# Supplementary material for: TYK2–STAT1–BCL2 Pathway Dependence in T-cell Acute Lymphoblastic Leukemia
Source: Oxford University Press journal article supplement (doi:10.1158/2159-8290.cd-12-0504), 2013-03-07
Supplement: 21598290cd120504-sup-tab1.xls [file 21598290cd120504-sup-tab1.xls]

## Sheet: Table S1
Supplementary Table 1: Cell viability profile by RAPID assay.
Gene Target	Mean	Standard Error	p-Value (Compared with Control siRNA)
ABL1	124.483	19.2382	0.684034
ABL2	128.31	21.0229	0.625575
ACK1	133.241	13.442	0.419831
ALK	114.328	16.1033	0.921275
AXL	116.447	10.7047	0.822562
BLK	130.052	8.59713	0.382414
BMX	125.554	5.94543	0.42885
BTK	136.172	10.0457	0.293913
TP53RK	121.633	11.1304	0.656314
CSF1R	101.17	4.5607	0.44714
CSK	103.918	2.25807	0.324955
DDR1	103.341	3.32596	0.432647
DDR2	85.9618	9.03866	0.0255814
STYK1	95.2481	7.08455	0.319532
EGFR	84.4052	8.04483	0.222424
EPHA1	89.5945	7.63648	0.286018
EPHA2	103.919	10.2403	0.694764
EPHA3	101.777	6.80969	0.45211
EPHA4	99.8854	7.08996	0.309558
EPHA7	102.756	7.62959	0.551701
EPHA8	96.5149	3.83172	0.0979007
EPHB1	97.522	4.80444	0.257744
EPHB2	92.7806	5.56727	0.263203
EPHB3	82.3409	7.30593	0.169771
EPHB4	92.6824	4.22222	0.0847493
EPHB6	103.052	1.64333	0.335711
ERBB2	100.667	3.4213	0.15574
ERBB3	94.0529	4.67465	0.305341
ERBB4	95.3854	5.04767	0.278668
FER	103.085	10.5175	0.651468
FES	90.9922	1.22477	0.122821
FGFR1	90.6958	5.2572	0.0796834
FGFR2	88.2494	4.86319	0.0933702
FGFR3	90.2845	1.31033	0.133902
FGFR4	92.5917	4.83313	0.0638766
FGR	98.5322	3.92088	0.26157
FLT1	94.3588	4.11985	0.212799
FLT3	91.4717	4.31496	0.186763
FLT4	94.8709	6.7863	0.363871
FRK	104.781	15.3666	0.766898
FYN	93.3943	1.2247	0.193004
HCK	81.5578	3.5044	0.0273058
IGF1R	88.7078	5.2126	0.193463
INSR	89.2438	7.99072	0.0649537
ITK	84.0149	5.3828	0.0239963
JAK1	93.4077	1.58604	0.182115
JAK2	96.7714	2.52341	0.214131
JAK3	101.378	6.09548	0.378658
KDR	108.302	6.05924	0.813754
KIT	118.292	8.61715	0.617275
LMTK2	96.613	3.48037	0.301374
LCK	91.1738	2.51652	0.155326
LTK	87.2447	1.57	0.129825
LYN	86.3085	1.16226	0.0699995
MATK	87.5518	1.49789	0.105224
MERTK	80.1181	3.91619	0.0532448
MET	81.3036	2.1565	0.0452524
MST1R	91.0719	2.55002	0.0719366
MUSK	95.6806	5.59834	0.0433082
NTRK1	93.9041	1.23559	0.160503
NTRK2	104.083	6.97168	0.0266199
NTRK3	105.707	4.79264	0.314119
PDGFRA	118.643	4.63733	0.192342
PDGFRB	125.22	8.07632	0.194172
PTK2	118.888	3.92653	0.389832
PTK2B	110.94	8.76098	0.90793
PTK6	99.7129	6.32767	0.124136
PTK7	97.8805	7.35587	0.0589272
PTK9	105.142	4.70231	0.260103
PTK9L	100.871	0.221213	0.32745
RET	107.047	4.0452	0.736631
ROR1	118.738	3.79523	0.601323
ROR2	122.218	6.98458	0.557859
ROS1	134.071	2.72122	0.161345
RYK	140.464	9.38915	0.242919
SRC	111.35	8.20703	0.988082
SYK	114.758	9.95832	0.878909
TEC	103.24	9.88027	0.684418
TEK	96.1466	4.30323	0.326111
TIE	92.1865	5.0707	0.128832
TNK1	126.25	8.89735	0.440083
TXK	107.468	6.58487	0.792614
TYK2	47.4745	4.57562	0.0373077
TYRO3	106.703	7.53204	0.76561
YES1	108.833	6.86166	0.869808
ZAP0	106.561	7.44849	0.0952135
N-RAS	101.073	1.40212	0.269104
K-RAS	89.6188	5.22672	0.104332
EPHA5	104.236	5.30893	0.630552
EPHA6	101.589	4.87262	0.523033
SRMS	94.984	3.24418	0.2727
AATK	103.667	9.49488	0.0346954
LMTK3	111.823	3.39908	0.975183
CONTROL 1	110.055	16.8585	N/A
CONTROL 2	111.626	8.20978	N/A
