# Supplementary material for: TYK2–STAT1–BCL2 Pathway Dependence in T-cell Acute Lymphoblastic Leukemia
Source: Oxford University Press journal article supplement (doi:10.1158/2159-8290.cd-12-0504), 2013-03-07
Supplement: 21598290cd120504-sup-tab4.xls [file 21598290cd120504-sup-tab4.xls]

## Sheet: Table S4
Supplementary Table 4. Sensitivities to TYK2 knockdown and JAK Inhibitor I treatment, and phosphorylation status of downstream signaling molecules in T-ALL cell lines and Ba/F3 clones.
Cell lines		TYK2 genetic status	Growth rate after TYK2 knock-down (day7/day3: % of control shRNA)	IC50 (mM) for JAK Inhibitor I at day 3	Phosphorylation status of signaling molecules
					p-STAT1 (Y701)	p-STAT2 (Y689)	p-STAT3 (Y705)	p-STAT4 (Y693)	p-STAT5 (Y964)	p-AKT (S473)	p-ERK1/2 (T202/Y204)	p-CRKL (Y207)
T-ALL	CCRF-CEM	mut	47.5485	3-10	+-	-	+	-	-	+	-	+
	DND-41	wt	49.2913	1-3	+	-	+	+	+	-	-	+
	DU.528	wt	50.4112	<1.0	+	-	-	-	+	-	-	-
	HPB-ALL	wt	53.3536	1-3	+	-	+	-	-	+	-	+
	H-SB2	wt	N/A (*1)	>30	+	+-	+	+	+	-	+	+
	JURKAT	wt	49.9198	3-10	+	-	+	+	-	+	+	+
	ALL-SIL	wt	N/A (*1)	3-10	+	-	-	-	+	-	-	+
	KOPT-K1	wt	39.7471	3-10	+	-	+	+	-	-	-	+
	LOUCY	wt	98.0765	>30	+	-	+	-	-	-	-	+
	MOLT-16	mut	53.6635	10-30	+	-	+	-	-	-	-	+
	MOLT-4	mut	53.6791	10-30	+	-	+	-	-	+	-	+
	P12-ICHIKAWA	wt	65.461	3-10	-	-	+	-	-	+	-	-
	PEER	wt	59.1578	<1.0	+	-	+	-	+	-	-	+
	PF-382	wt	59.4298	10-30	+	-	+	-	-	-	-	+
	RPMI-8402	mut	59.7979	10-30	+	-	+	+	-	+	+-	+
	SKW-3/KE-37	wt	65.8268	3-10	+	-	+	-	-	+	-	+
	SUP-T11	wt	N/A (*1)	>30	-	-	-	-	-	-	-	-
	SUP-T13	wt	52.7494	1-3	+	-	-	+	+	+	-	+
	TALL-1	wt	98.1782	10-30	+	-	+	-	-	-	-	+
Ba/F3	Ba/F3 TEL-JAK1		N/A	<1.0	-	N/A	-	N/A	+	+	+-	N/A
	Ba/F3 TEL-JAK2		N/A	<1.0	-	N/A	+	N/A	+	+	-	N/A
	Ba/F3 TEL-JAK3		N/A	3-10	-	N/A	+	N/A	+	+	-	N/A
	Ba/F3 TYK2 E957D		N/A	<1.0	+	N/A	+	N/A	+	+-	+	N/A
	Ba/F3 TEL-ABL		N/A	>30	-	N/A	+-	N/A	+	+-	-	N/A
	wt: wild-type
	N/A: not accessed
	*1: not accessed due to the poor transduction efficiency
