# Supplementary material for: TYK2–STAT1–BCL2 Pathway Dependence in T-cell Acute Lymphoblastic Leukemia
Source: Oxford University Press journal article supplement (doi:10.1158/2159-8290.cd-12-0504), 2013-03-07
Supplement: 21598290cd120504-sup-tab5.xls [file 21598290cd120504-sup-tab5.xls]

## Sheet: All genes filtered (30988)
Supplementary Table 5: Gene expression profile after TYK2 and STAT1 knockdown in JURKAT cells (All genes filtered)
KD: knockdown, FC: fold-change
Gene Information					control vs TYK2 KD								control vs STAT1 KD								Normalized signal
probe set	gene	Accession	EntrezGene	Description	control mean	KD mean	fold change	lower bound of FC	upper bound of FC	difference of means	t statistic	P value	control mean	KD mean	fold change	lower bound of FC	upper bound of FC	difference of means	t statistic	P value	GFP_dup1	GFP_dup2	Luc_dup1	Luc_dup2	TYK2_#2_dup1	TYK2_#2_dup2	TYK2_#3_dup1	TYK2_#3_dup2	STAT1_#2_dup1	STAT1_#2_dup2	STAT1_#3_dup1	STAT1_#3_dup2
1007_s_at	DDR1: discoidin domain receptor family, member 1	U48705	780	U48705mRNA	331.98	485.13	1.46	1.13	1.82	153.15	2.33	0.086466	331.98	412.7	1.24	0.97	1.54	80.72	1.48	0.213352	386.22	336.33	287.23	318.13	598.32	587.9	377.6	376.7	561.86	385.17	360.72	343.04
1053_at	RFC2: replication factor C (activator 1) 2, 40kDa	M87338	5982	M87338	1541.12	1430.68	-1.08	-0.97	-1.2	-110.45	-1.205	0.288278	1541.12	1305.83	-1.18	-1.09	-1.28	-235.29	-3.571	0.012576	1425.75	1540.82	1578.51	1619.41	1299.74	1281.83	1542.4	1598.73	1285.53	1451.47	1273.02	1213.32
121_at	PAX8: paired box 8	X69699	7849	X69699	79.53	76.35	-1.04	-0.85	-1.25	-3.18	-0.35	0.742485	79.53	62.68	-1.27	-0.99	-1.63	-16.85	-1.584	0.16577	60.62	98.11	72.73	86.65	78.03	67.8	86.38	73.2	60.1	82.62	52.87	55.11
1294_at	UBA7: ubiquitin-like modifier activating enzyme 7	L13852	7318	L13852	223.54	206.69	-1.08	-1	-1.17	-16.85	-1.58	0.166267	223.54	218.39	-1.02	-0.88	-1.21	-5.15	-0.251	0.814308	242.46	224.44	202.96	224.3	211.97	191.48	223.35	199.95	219.28	172.74	216.21	265.32
1316_at	THRA: thyroid hormone receptor, alpha (erythroblastic leukemia viral (v-erb-a) oncogene homolog, avian)	X55005	7067	X55005mRNA	167.56	172.14	1.03	0.92	1.13	4.58	0.43	0.688543	167.56	183.88	1.1	0.98	1.22	16.32	1.328	0.25778	163.09	158.9	169.59	178.66	178.34	145.22	191.43	173.56	199	207.91	161.34	167.29
1431_at	CYP2E1: cytochrome P450, family 2, subfamily E, polypeptide 1	J02843	1571	J02843cds	27.04	38.36	1.42	1.09	1.93	11.32	2.183	0.073518	27.04	41.61	1.54	1.17	2.1	14.57	2.598	0.04078	25.86	38.67	20.85	22.79	36.39	47.09	38.62	31.34	45.58	34.06	36.16	50.64
1487_at	ESRRA: estrogen-related receptor alpha	L38487	2101	L38487mRNA	1300.59	974.84	-1.33	-1.23	-1.44	-325.74	-5.663	0.003186	1300.59	1513.65	1.16	1	1.33	213.06	1.692	0.163829	1334.13	1429.57	1218.76	1219.88	934.74	941.65	1052.34	970.64	1229.76	1435.31	1635.35	1754.16
1494_f_at	CYP2A6: cytochrome P450, family 2, subfamily A, polypeptide 6	M33318	1548	M33318mRNA	74.17	62.58	-1.19	-1.07	-1.32	-11.59	-2.923	0.040514	74.17	61.8	-1.2	-1	-1.49	-12.38	-1.666	0.185718	76.71	70.77	77.29	71.93	66.55	66.44	65.55	51.79	75.57	72.58	46.19	52.84
160020_at	MMP14: matrix metallopeptidase 14 (membrane-inserted)	Z48481	4323	4870053	35.87	34.51	-1.04	-0.83	-1.27	-1.36	-0.298	0.780238	35.87	37.53	1.05	0.78	1.39	1.66	0.259	0.804265	28.8	37.67	30.03	47	37.7	32.1	37.58	30.65	51.52	36.35	30.12	32.15
1729_at	TRADD: TNFRSF1A-associated via death domain	L41690	8717	L41690	242.01	304.58	1.26	1.13	1.4	62.57	3.537	0.013092	242.01	232.41	-1.04	-0.89	-1.24	-9.6	-0.403	0.704847	244.67	214.38	268.95	240.04	285.61	276.57	326.31	329.83	170.15	246.69	262.09	250.71
1861_at	BAD: BCL2-antagonist of cell death	U66879	572	U66879	445.38	625.23	1.4	1.31	1.5	179.85	8.142	0.00022	445.38	392.17	-1.14	-1.01	-1.28	-53.21	-1.849	0.12716	420.28	431.18	445.31	484.75	659.43	645.28	612.77	583.44	317.35	416.61	410.65	424.09
200000_s_at	PRPF8: PRP8 pre-mRNA processing factor 8 homolog (S. cerevisiae)	NM_006445	10594	g5453983	3492.15	3620.2	1.04	0.95	1.13	128.05	0.686	0.530469	3492.15	4076.79	1.17	1.1	1.23	584.64	4.375	0.006986	3584.73	3293.1	3485.51	3605.26	3936.79	3900.52	3331.94	3311.56	4300.51	3767.98	4073.34	4165.35
200001_at	CAPNS1: calpain, small subunit 1	NM_001749	826	g4502564	1571.4	1649.71	1.05	0.97	1.13	78.31	1.08	0.330558	1571.4	1588.72	1.01	0.85	1.17	17.32	0.115	0.914837	1666.28	1589.56	1494.14	1535.61	1736.89	1727.2	1665.84	1468.92	1403.27	1289.18	1749.46	1912.98
200002_at	RPL35: ribosomal protein L35	NM_007209	11224	g6005859	12177	12775.7	1.05	1.02	1.08	598.73	2.655	0.038045	12177	12939.8	1.06	1.03	1.1	762.82	2.965	0.027868	12291	12289.1	11727.2	12400.6	13083.8	12945.2	12754.4	12319.5	12717.7	12541.6	13009.2	13490.8
200003_s_at	RPL28: ribosomal protein L28	NM_000991	6158	g4506626	16178	16217.7	1	0.98	1.03	39.79	0.181	0.862498	16178	16740.6	1.03	0.98	1.09	562.65	1.059	0.356291	16522	16185.2	15775.6	16229	15868.2	16125.3	16626	16251.5	15614.9	16153.5	17487.4	17706.6
200004_at	EIF4G2: eukaryotic translation initiation factor 4 gamma, 2	NM_001418	1982	g4503538	11498.8	9732.34	-1.18	-0.96	-1.54	-1766.43	-1.271	0.289128	11498.8	10643.7	-1.08	-0.97	-1.22	-855.07	-1.115	0.33464	11411.3	10922.2	11702.4	11959.2	12026.3	12185	7470.56	7247.6	9518.85	9239.57	11788.9	12027.5
200005_at	EIF3D: eukaryotic translation initiation factor 3, subunit D	NM_003753	8664	g4503522	5488.94	4731.62	-1.16	-1.14	-1.19	-757.32	-11.508	2.8e-05	5488.94	5745.74	1.05	1.03	1.06	256.8	4.635	0.004155	5490.88	5574.81	5368.3	5521.76	4870.23	4639.66	4718.44	4698.16	5723.86	5745.66	5675.76	5837.67
200006_at	PARK7: Parkinson disease (autosomal recessive, early onset) 7	NM_007262	11315	g6005748	9423.34	10425.4	1.11	1.07	1.15	1002.08	4.433	0.00476	9423.34	10177.4	1.08	1.04	1.13	754.09	2.979	0.028303	9778.33	9539.02	9163.54	9212.45	10345.7	10889.6	10051.4	10415	10614.4	10377.9	9654.81	10062.6
200007_at	SRP14: signal recognition particle 14kDa (homologous Alu RNA binding protein)	NM_003134	6727	g4507210	9507.39	10378.1	1.09	1.03	1.15	870.67	2.601	0.04071	9507.39	10055.9	1.06	0.98	1.13	548.47	1.293	0.249124	9507.05	8823.81	9801.24	9897.45	10878.5	10634.8	10133.9	9865.11	9238.44	9783.51	10357	10844.5
200008_s_at	GDI2: GDP dissociation inhibitor 2	D13988	2665	g285974	2157.17	2245.93	1.04	0.87	1.21	88.76	0.399	0.714953	2157.17	2026.49	-1.06	-0.92	-1.27	-130.68	-0.662	0.551919	2063.66	2144.52	2257.1	2163.4	2670.87	2572.09	1922.69	1818.08	1447.93	2206.42	2192.28	2259.32
200009_at	GDI2: GDP dissociation inhibitor 2	NM_001494	2665	g6598322	6932.8	7146.53	1.03	0.94	1.13	213.73	0.53	0.629935	6932.8	7680.59	1.11	1.06	1.15	747.8	4.003	0.013076	6864.01	6726.64	7060.14	7080.4	7843.42	7814.48	6499.82	6428.39	8160.39	7532.14	7629.7	7400.15
200010_at	RPL11: ribosomal protein L11	NM_000975	6135	g4506594	14009.8	14386	1.03	1	1.06	376.19	1.589	0.163887	14009.8	14284.7	1.02	0.97	1.07	274.92	0.689	0.528357	14425.5	13710.9	14068	13834.7	14722.4	14513.7	14417.7	13890	13252.7	14356.8	14557.8	14971.4
200011_s_at	ARF3: ADP-ribosylation factor 3	NM_001659	377	g4502202	1924.19	2181.79	1.13	1.02	1.25	257.61	1.919	0.133816	1924.19	1983.58	1.03	0.89	1.18	59.39	0.349	0.747455	1803.76	1923.34	1974.98	1994.67	2411.48	2382.07	2033.89	1899.73	1789.18	1621.81	2231.66	2291.67
200012_x_at	LOC653737 /// LOC728501 /// LOC729402 /// LOC731567 /// RPL21: ribosomal protein L21 /// similar to ribosomal protein L21 /// 60S ribosomal protein L21 pseudogene /// similar to 60S ribosomal protein L21	NM_000982	6144 /// 653737 /// 728501 /// 729402 /// 731567	g4506610	14033.1	14187.4	1.01	0.97	1.06	154.35	0.414	0.700306	14033.1	14214.9	1.01	0.99	1.03	181.85	1.012	0.352166	14358.6	14153.5	13734.4	13885.8	14668.2	14798.5	13984.1	13298.9	13914.5	14296.9	14190.9	14457.4
200013_at	RPL24: ribosomal protein L24	NM_000986	6152	g4506618	17131.5	13656.5	-1.25	-1.02	-1.64	-3474.98	-1.782	0.172088	17131.5	17289.2	1.01	0.96	1.06	157.72	0.322	0.766405	17421.4	16982.2	16887.9	17234.5	10347.5	10226.6	17173	16878.9	15869.4	17700	17718.2	17869.4
200014_s_at	HNRNPC: heterogeneous nuclear ribonucleoprotein C (C1/C2)	NM_004500	3183	g4758543	9088.86	8816.6	-1.03	-1.01	-1.05	-272.27	-2.254	0.070047	9088.86	8887.24	-1.02	-0.97	-1.08	-201.62	-0.689	0.535685	8883.96	9149.98	9129.69	9191.82	8896.3	9057.62	8680.21	8632.25	8213.73	8617.78	9362.94	9354.52
200015_s_at	SEPT2: septin 2	NM_004404	4735	g4758157	5442.41	6288.26	1.16	1.03	1.29	845.85	1.978	0.116961	5442.41	5334.58	-1.02	-0.8	-1.4	-107.83	-0.122	0.910233	5909.07	5499.33	5182.08	5179.17	7104.55	6811.47	5610.92	5626.13	3574.21	4111.63	6787.46	6865.03
200016_x_at	HNRNPA1: heterogeneous nuclear ribonucleoprotein A1	NM_002136	3178	g4504444	16743	16102.4	-1.04	-1.02	-1.06	-640.6	-2.798	0.032025	16743	17245.1	1.03	1.01	1.05	502.05	2.208	0.070199	16357.8	17074.5	16825.4	16714.5	16135.8	16342.2	16331.2	15600.5	17549.1	16828.3	17099.3	17503.6
200017_at	RPS27A: ribosomal protein S27a	NM_002954	6233	g4506712	15800.4	15673.6	-1.01	-0.96	-1.06	-126.79	-0.278	0.795031	15800.4	16115.5	1.02	1	1.04	315.17	1.571	0.172292	15325.8	15853	16047.6	15975.1	15784.7	16729.1	15516.8	14663.6	15914.6	16203.4	15939.1	16405
200018_at	RPS13: ribosomal protein S13	NM_001017	6207	g4506684	17362.9	17689.5	1.02	1	1.04	326.63	1.63	0.1895	17362.9	17999.8	1.04	1.02	1.05	636.92	4.491	0.011097	17291.7	17267.7	17390	17502.4	17990.6	18040.4	17467.1	17260.1	18018.8	17634.6	18254.5	18091.5
200019_s_at	FAU: Finkel-Biskis-Reilly murine sarcoma virus (FBR-MuSV) ubiquitously expressed	NM_001997	2197	g4503658	13502.4	14546.7	1.08	1.02	1.13	1044.28	2.336	0.079876	13502.4	14076.2	1.04	1	1.09	573.84	1.678	0.156904	13700.1	13401.6	13070.6	13837.3	15239	15285.7	13835.3	13826.7	13833.2	13414	14256.4	14801.5
200020_at	TARDBP: TAR DNA binding protein	NM_007375	23435	g6678270	5462.47	5235.51	-1.04	-1.01	-1.08	-226.96	-1.898	0.129089	5462.47	5718.3	1.05	1	1.1	255.83	1.512	0.182596	5243.83	5317.51	5713.8	5574.73	5267.96	5232.17	5333.92	5107.98	5566.35	5444.52	5858.94	6003.38
200021_at	CFL1: cofilin 1 (non-muscle)	NM_005507	1072	g5031634	11714.3	13009.4	1.11	1.05	1.18	1295.08	2.846	0.04392	11714.3	12767.3	1.09	1.03	1.15	1053.04	2.356	0.074156	11464.3	11352	11862.9	12178	13568.4	13854.5	12450.7	12164	13945.5	12152.6	12340.1	12631.1
200022_at	RPL18: ribosomal protein L18	NM_000979	6141	g4506606	13790.2	14195	1.03	1.01	1.05	404.86	2.018	0.090285	13790.2	14541	1.05	0.99	1.12	750.89	1.42	0.238502	14069.3	13917.4	13392.1	13781.9	13945.2	14004	14546.6	14284.3	13181.3	14394.7	15073	15515.2
200023_s_at	EIF3F: eukaryotic translation initiation factor 3, subunit F	NM_003754	8665	g4503518	9976.78	8660.94	-1.15	-0.97	-1.41	-1315.84	-1.327	0.267331	9976.78	10458.2	1.05	0.99	1.11	481.41	1.467	0.192978	10455.6	10320.9	9594.34	9536.3	6936.54	7052.99	10371.4	10282.8	9908.3	10275.5	10809.7	10839.3
200024_at	LOC392424 /// RPS5: ribosomal protein S5 /// similar to ribosomal protein S5	NM_001009	392424 /// 6193	g4506728	13031.2	13684.7	1.05	1	1.1	653.51	1.726	0.167003	13031.2	13440.1	1.03	1	1.06	408.9	1.596	0.178374	13236.4	13052	12701.4	13135	14426.4	14092.6	13411	12808.8	13149.5	13005.9	13590.7	14014.4
200025_s_at	RPL27: ribosomal protein L27	NM_000988	6155	g4506622	15065.4	14773.1	-1.02	-0.98	-1.06	-292.26	-0.852	0.432128	15065.4	15893.7	1.05	1.03	1.08	828.27	3.364	0.015699	15095.7	14546.8	15185.6	15433.5	14821.3	15569.3	14361.1	14340.8	16228.7	15461.2	15983.8	15901
200026_at	LOC342994 /// LOC651249 /// LOC729536 /// RPL34: ribosomal protein L34 /// similar to ribosomal protein L34 /// hypothetical protein LOC729536	NM_000995	342994 /// 6164 /// 651249 /// 729536	g4506636	11967.2	12461.2	1.04	1.01	1.07	493.99	2.24	0.07436	11967.2	12451.6	1.04	1.01	1.07	484.41	2.348	0.062233	12233.5	11988.9	11657.7	11988.5	12692.2	12695.6	12544	11912.8	12107.1	12310.1	12486.8	12902.4
200027_at	NARS: asparaginyl-tRNA synthetase	NM_004539	4677	g7262387	6322.97	4748.81	-1.33	-1.13	-1.62	-1574.17	-2.964	0.049768	6322.97	4835.13	-1.31	-1.01	-1.85	-1487.84	-1.701	0.182891	6189.98	5988.85	6563.28	6549.78	5606.2	5664.28	3882.7	3842.04	6631.01	5992.11	3460.59	3256.82
200028_s_at	STARD7: StAR-related lipid transfer (START) domain containing 7	NM_020151	56910	g9910251	5010.71	5538.93	1.11	1.07	1.14	528.22	4.573	0.016026	5010.71	5694.78	1.14	1.09	1.18	684.07	4.999	0.013146	5074.95	4961.85	4983.6	5022.46	5329.9	5363.56	5684.1	5778.16	5522.26	5409.86	5893.67	5953.35
200029_at	RPL19: ribosomal protein L19	NM_000981	6143	g4506608	15452.6	15180.8	-1.02	-1	-1.04	-271.74	-1.5	0.188266	15452.6	15565.8	1.01	0.97	1.05	113.23	0.301	0.778246	15608	15750.7	15089.3	15362.3	14981	15084.9	15483.5	15173.9	15015.5	14936.1	16310.8	16000.8
200030_s_at	SLC25A3: solute carrier family 25 (mitochondrial carrier; phosphate carrier), member 3	NM_002635	5250	g4505774	9756.77	9174.55	-1.06	-1	-1.14	-582.22	-1.588	0.190277	9756.77	10599.2	1.09	0.98	1.2	842.46	1.287	0.282076	10109	9796.84	9560.28	9560.94	8660.74	8506.82	9797.95	9732.69	9306.18	9705.02	11502.4	11883.3
200031_s_at	RPS11: ribosomal protein S11	NM_001015	6205	g4506680	17475	18713.2	1.07	1.02	1.13	1238.22	2.096	0.118124	17475	18015.8	1.03	0.98	1.08	540.85	1.098	0.34249	17298.1	17369.6	17357.8	17874.3	19836.9	19568.3	17822.4	17625.1	16919.3	17533.2	18716.7	18894
200032_s_at	RPL9: ribosomal protein L9	NM_000661	6133	g4506664	16693	17310.2	1.04	1.01	1.06	617.18	2.353	0.079079	16693	17376.5	1.04	1.02	1.06	683.56	3.585	0.016272	16894.2	16495.9	16556.4	16825.5	17948.3	17345.2	17167.5	16779.7	16927.9	17528.2	17363.2	17686.9
200033_at	DDX5: DEAD (Asp-Glu-Ala-Asp) box polypeptide 5	NM_004396	1655	g13514826	10482.2	10700.8	1.02	1	1.04	218.54	1.959	0.099872	10482.2	10559.8	1.01	0.98	1.03	77.54	0.502	0.635942	10594.9	10578.8	10529.4	10225.8	10656.2	10840.4	10782.3	10524.2	10508.8	10879.4	10258.9	10591.9
200034_s_at	RPL6: ribosomal protein L6	NM_000970	6128	g4506656	15489.4	15988.1	1.03	1	1.07	498.74	1.444	0.205364	15489.4	16242.7	1.05	1.02	1.08	753.34	2.45	0.0718	15570.1	14680.8	16020.6	15686	16528.6	15969.8	15830.1	15624	16021	16320.5	16105.1	16524.3
200035_at	DULLARD: dullard homolog (Xenopus laevis)	NM_015343	23399	g7661721	2981.03	2747.57	-1.08	-0.94	-1.28	-233.46	-0.91	0.417058	2981.03	3219.64	1.08	0.99	1.17	238.61	1.535	0.182155	3171.05	3085.81	2803.38	2863.87	2345.66	2330.1	3271.06	3043.45	3156.67	2886.27	3372.79	3462.83
200036_s_at	RPL10A: ribosomal protein L10a	NM_007104	4736	g6325471	10701.3	9141.27	-1.17	-1.06	-1.31	-1560.01	-2.579	0.053122	10701.3	11171.9	1.04	0.99	1.1	470.64	1.415	0.219595	11188.2	11193.2	10051.5	10372.1	8116.5	8384.57	9737.81	10326.2	10706.8	11286.5	11464.5	11229.9
200037_s_at	CBX3 /// LOC653972: chromobox homolog 3 (HP1 gamma homolog, Drosophila) /// similar to chromobox homolog 3	NM_016587	11335 /// 653972	g7705406	8853.28	6771.07	-1.31	-1.19	-1.45	-2082.21	-4.966	0.010442	8853.28	8615.23	-1.03	-0.96	-1.1	-238.05	-0.693	0.527839	9098.58	8859.66	8933.56	8521.32	7488.94	7436.83	5987.49	6171.02	9089.1	9246.68	8108.57	8016.58
200038_s_at	RPL17: ribosomal protein L17	NM_000985	6139	g4506616	17012.3	16348.4	-1.04	-1.02	-1.07	-663.88	-2.686	0.054121	17012.3	17368.9	1.02	0.99	1.05	356.65	1.095	0.341835	17257.1	16874.3	17077	16840.7	16178.5	15861.4	16940.3	16413.4	16812.5	17035.3	17399.1	18228.8
200039_s_at	PSMB2: proteasome (prosome, macropain) subunit, beta type, 2	NM_002794	5690	g4506194	7566.95	7857.48	1.04	1.02	1.06	290.53	3.261	0.034087	7566.95	7302.25	-1.04	-1.01	-1.06	-264.7	-2.526	0.07317	7583.81	7605.35	7478.14	7600.5	7886.58	7653.35	7829.54	8060.45	7244.34	7094.17	7295.69	7574.79
200040_at	KHDRBS1: KH domain containing, RNA binding, signal transduction associated 1	NM_006559	10657	g5730026	6543.75	6003.92	-1.09	-1.01	-1.17	-539.83	-1.861	0.137845	6543.75	7137.42	1.09	1.01	1.18	593.67	1.805	0.127029	6175.27	5995.31	7093.61	6910.81	6229.16	6141.18	5843.55	5801.79	6627.37	7101.4	7325.65	7495.26
200041_s_at	BAT1: HLA-B associated transcript 1	NM_004640	7919	g4758111	2755.78	2082.05	-1.32	-1.25	-1.4	-673.73	-8.457	0.000149	2755.78	3629.11	1.32	0.77	1.87	873.33	0.951	0.411181	2868.53	2826.47	2622.6	2705.54	2216.3	2014.75	1966.76	2130.39	6377.74	2753.76	2713.45	2671.5
200042_at	C22orf28: chromosome 22 open reading frame 28	NM_014306	51493	g7657014	3151.92	2445.19	-1.29	-1.09	-1.57	-706.74	-2.629	0.074139	3151.92	3157.53	1	0.96	1.04	5.61	0.073	0.94441	3180.57	3209.92	3195.67	3021.54	1954.8	2018.09	2899.1	2908.75	3324.51	3184.7	3066.66	3054.25
200043_at	ERH: enhancer of rudimentary homolog (Drosophila)	NM_004450	2079	g4758301	12168.6	13073.1	1.07	1.05	1.1	904.5	4.964	0.010995	12168.6	11784.9	-1.03	-0.99	-1.08	-383.73	-1.127	0.338598	12058.6	12118.5	12279.5	12217.9	13420	13261.4	12992.9	12618.3	12015.5	12607.8	11063.3	11453
200044_at	SFRS9: splicing factor, arginine/serine-rich 9	NM_003769	8683	g4506902	5926.92	6308.46	1.06	1.01	1.12	381.54	1.877	0.151954	5926.92	5892.3	-1.01	-0.97	-1.05	-34.61	-0.237	0.826583	6029.95	5889.37	5901.94	5886.42	6774.53	6498.22	5899.46	6061.64	5567.5	5761.41	6208.85	6031.46
200045_at	ABCF1: ATP-binding cassette, sub-family F (GCN20), member 1	NM_001090	23	g10947134	670.08	702.31	1.05	1.01	1.08	32.23	2.269	0.063759	670.08	796.33	1.19	1.06	1.32	126.25	2.384	0.091249	653.81	676.69	695.54	654.28	698.67	711.57	722.98	676.05	935.24	815.92	707.2	726.96
200046_at	DAD1: defender against cell death 1	NM_001344	1603	g4503252	4370.16	5591.31	1.28	1.22	1.34	1221.15	9.115	0.000136	4370.16	4205.07	-1.04	-0.97	-1.11	-165.09	-0.932	0.397954	4321.78	4202.57	4360.43	4595.86	5755.41	5792.22	5406.11	5411.52	3863.58	4615.07	4109.25	4232.39
200047_s_at	YY1: YY1 transcription factor	NM_003403	7528	g6042207	6918.98	6382.93	-1.08	-0.97	-1.23	-536.06	-1.163	0.328289	6918.98	6651.57	-1.04	-0.98	-1.11	-267.42	-1.016	0.382301	6948.83	6997.2	6876.16	6853.75	5454.09	5732.18	7126.83	7218.62	5972.03	6544.28	7177.82	6912.13
200048_s_at	JTB: jumping translocation breakpoint	NM_006694	10899	g5729888	8616.05	8890.11	1.03	0.99	1.07	274.05	1.353	0.231069	8616.05	8635.72	1	0.97	1.04	19.67	0.115	0.912015	8600.09	8329.78	8648.95	8885.38	8390.88	9011.91	9053.12	9104.51	8322.28	8540.25	8804.03	8876.34
200049_at	MYST2: MYST histone acetyltransferase 2	NM_007067	11143	g5901961	594.54	683.44	1.15	1.03	1.27	88.9	2.028	0.127586	594.54	638.13	1.07	0.99	1.16	43.59	1.407	0.239718	602.31	570.83	614.7	590.31	776.76	720.91	658.86	577.21	658.36	552.97	651.87	689.32
200050_at	ZNF146: zinc finger protein 146	NM_007145	7705	g6005965	4235.55	3545.82	-1.19	-1.11	-1.3	-689.74	-3.967	0.017675	4235.55	3399.91	-1.25	-1.03	-1.56	-835.64	-1.978	0.138367	4162.52	4182.89	4422.56	4174.25	3316.42	3226	3749.04	3891.82	2664.47	2698.76	4240.66	3995.76
200051_at	SART1: squamous cell carcinoma antigen recognized by T cells	NM_005146	9092	g10863888	1094.5	1014.66	-1.08	-1.01	-1.16	-79.84	-1.904	0.142313	1094.5	997.59	-1.1	-1.04	-1.16	-96.91	-3.086	0.040411	1104.32	1118.4	1082.86	1072.42	1061.3	1086.12	902.95	1008.27	1046.6	1048.82	963.17	931.76
200052_s_at	ILF2: interleukin enhancer binding factor 2, 45kDa	NM_004515	3608	g4758601	4353.52	4250.94	-1.02	-0.95	-1.11	-102.58	-0.496	0.652465	4353.52	3776.85	-1.15	-1	-1.36	-576.68	-1.628	0.200453	4283.55	4361.16	4331.25	4438.14	4738.02	4431.27	3852.86	3981.62	2922.82	4636.59	3883.8	3664.18
200053_at	SPAG7: sperm associated antigen 7	NM_004890	9552	g4757715	1622.13	1282.67	-1.26	-1.06	-1.51	-339.46	-2.235	0.067901	1622.13	1397.95	-1.16	-0.73	-2.64	-224.18	-0.459	0.674278	1855.72	1781.88	1461.36	1389.55	1073.36	1156.48	1470.81	1430.04	511.37	649.58	2120.23	2310.63
200054_at	LOC442240 /// ZNF259: zinc finger protein 259 /// similar to zinc finger protein 259	NM_003904	442240 /// 8882	g4508020	1599.84	1154.88	-1.39	-1.26	-1.52	-444.96	-5.307	0.004922	1599.84	1650.32	1.03	0.92	1.16	50.49	0.448	0.669771	1691.62	1375.54	1642.19	1690.01	1205.13	1226.69	1110.89	1076.82	1835.24	1743.6	1480.44	1542.02
200055_at	TAF10: TAF10 RNA polymerase II, TATA box binding protein (TBP)-associated factor, 30kDa	NM_006284	6881	g5454105	3674.85	3103.73	-1.18	-1.16	-1.21	-571.13	-14.182	0.000175	3674.85	3665.65	-1	-0.88	-1.16	-9.2	-0.03	0.977593	3634.85	3690.95	3700.68	3672.93	3201.73	3123.17	3050.02	3039.98	4568.5	3319.44	3368.33	3406.35
200056_s_at	C1D: nuclear DNA-binding protein	NM_006333	10438	g5453582	3655.73	3750.77	1.03	0.87	1.18	95.04	0.277	0.798878	3655.73	2953.89	-1.24	-1.04	-1.53	-701.84	-2.044	0.12917	3646.39	3589.91	3810.23	3576.39	3149.12	3187.35	4236.92	4429.68	2064.93	2785.73	3520.42	3444.5
200057_s_at	NONO: non-POU domain containing, octamer-binding	NM_007363	4841	g7657382	8481.57	8885	1.05	0.98	1.12	403.43	1.165	0.309242	8481.57	9733.93	1.15	1.11	1.19	1252.36	6.799	0.000496	8376.64	8163.48	8712.93	8673.23	9559.99	9304.21	8390.37	8285.43	9783.32	9586.82	9486.32	10079.3
200058_s_at	ASCC3L1: activating signal cointegrator 1 complex subunit 3-like 1	BC001417	23020	g12655128	5955.7	6275.11	1.05	1.02	1.09	319.42	2.331	0.060864	5955.7	6503.23	1.09	1.03	1.15	547.54	2.661	0.053779	6156.75	6022.85	5874.2	5768.98	6055.31	6147.48	6365.41	6532.25	6189.17	6176.65	6749.52	6897.58
200059_s_at	RHOA: ras homolog gene family, member A	BC001360	387	g12655024	8859.44	9770.95	1.1	1.05	1.16	911.51	3.125	0.046046	8859.44	9054.14	1.02	0.95	1.1	194.7	0.476	0.665093	8981.55	8840.77	8690.71	8924.73	10373.6	10138.9	9243.89	9327.41	7945.89	8961.94	9629.76	9678.97
200060_s_at	RNPS1: RNA binding protein S1, serine-rich domain	BC001659	10921	g12804496	4768	5219.44	1.09	1.01	1.19	451.44	1.933	0.12103	4768	5858.44	1.23	1.1	1.37	1090.43	2.949	0.029375	5143.41	5111.09	4507.54	4309.98	4977.69	5155.57	5440.54	5303.96	6607.67	6089.72	5300.15	5436.22
200061_s_at	RPS24: ribosomal protein S24	BC000523	6229	g12653502	16135.1	16810.8	1.04	1	1.08	675.74	1.703	0.176512	16135.1	16486.2	1.02	1.01	1.04	351.12	2.56	0.042904	16421.1	16102	16001.1	16016.2	17696.6	17210.3	16210	16126.4	16250.1	16458.9	16716.7	16519.1
200062_s_at	RPL30: ribosomal protein L30	L05095	6156	g388034	17033.2	17997.3	1.06	1.02	1.09	964.2	2.713	0.066319	17033.2	17707.3	1.04	1.02	1.06	674.16	2.976	0.044927	17107.4	16927	16892.6	17205.6	18588.1	18531.3	17737.2	17132.8	17363.3	17314	18027.1	18124.8
200063_s_at	NPM1: nucleophosmin (nucleolar phosphoprotein B23, numatrin)	BC002398	4869	g12803184	14128.6	14613.2	1.03	0.97	1.1	484.63	0.874	0.424372	14128.6	14118.2	-1	-0.94	-1.06	-10.36	-0.02	0.985211	13195.1	13397	14914.2	15008	15092.3	15055.2	14305.8	13999.4	13614.8	13946	14383.3	14528.7
200064_at	HSP90AB1: heat shock protein 90kDa alpha (cytosolic), class B member 1	AF275719	3326	g9082288	10594.3	10073.4	-1.05	-1.03	-1.08	-520.9	-3.719	0.013003	10594.3	10334.5	-1.03	-0.99	-1.06	-259.77	-1.314	0.258926	10688.3	10401.1	10546.8	10741.1	10207.8	9749.35	10278.7	10057.8	10185.2	10034.2	10254.6	10864.1
200065_s_at	ARF1: ADP-ribosylation factor 1	AF052179	375	g3360490	7241.43	7328.71	1.01	0.94	1.08	87.28	0.281	0.794229	7241.43	6244.94	-1.16	-1.04	-1.3	-996.49	-2.383	0.088352	6977.55	7212.31	7416.35	7359.51	6667.96	7018.82	7667.85	7960.21	6655.49	7168.54	5766.53	5389.2
200066_at	IK: IK cytokine, down-regulator of HLA II	AF182645	3550	g5901877	2344.08	2665.6	1.14	1.08	1.19	321.52	4.649	0.011944	2344.08	2286.39	-1.03	-0.97	-1.08	-57.69	-0.782	0.473513	2432.12	2480.04	2219.18	2244.99	2621.89	2710.91	2694.59	2634.99	2190.8	2344.7	2320.05	2289.99
200067_x_at	SNX3: sorting nexin 3	AL078596	8724	Hs.12102.0	3152.79	4004.85	1.27	1.19	1.35	852.05	6.334	0.000725	3152.79	3209.85	1.02	0.8	1.24	57.05	0.136	0.899495	2990.61	3056.51	3422.97	3141.09	3800.86	4083.44	3905.06	4230.03	2318.76	2726.3	4007.22	3787.1
200068_s_at	CANX: calnexin	M94859	821	g179831	8500.02	8841.54	1.04	0.98	1.1	341.53	1.166	0.293292	8500.02	8250.84	-1.03	-0.88	-1.24	-249.18	-0.293	0.787416	8320.89	8131.55	8687.39	8860.23	8499.79	8374.46	9379.35	9112.58	6598.45	7029.86	9631.78	9743.26
200069_at	SART3: squamous cell carcinoma antigen recognized by T cells 3	AI656011	9733	Hs.116875.0	1383.75	1123.36	-1.23	-1.11	-1.38	-260.39	-3.609	0.034373	1383.75	1314.51	-1.05	-0.92	-1.23	-69.25	-0.589	0.596847	1384.53	1364.5	1375.45	1410.52	1185.94	1294.67	987.81	1025.01	1084.42	1148.87	1567.74	1456.99
200070_at	C2orf24: chromosome 2 open reading frame 24	BC001393	27013	g12655084	2081.1	2231.15	1.07	1.01	1.14	150.05	1.838	0.115797	2081.1	2181.45	1.05	0.98	1.12	100.34	1.145	0.296143	2013.44	1959.36	2128.13	2223.47	2195.61	2119.46	2386.98	2222.57	2018.52	2207.64	2167.07	2332.56
200071_at	SMNDC1: survival motor neuron domain containing 1	BF224259	10285	Hs.79968.0	3388.86	3070.9	-1.1	-1.07	-1.13	-317.95	-6.009	0.001099	3388.86	3463.42	1.02	0.99	1.05	74.56	1.3	0.241321	3401.39	3326.58	3499.83	3327.63	2975.86	3130.93	3077.39	3099.43	3463.01	3482.8	3550.93	3356.93
200072_s_at	HNRPM: heterogeneous nuclear ribonucleoprotein M	AF061832	4670	g3126877	6053.49	5858.48	-1.03	-1	-1.07	-195	-1.531	0.193821	6053.49	6227.12	1.03	0.97	1.09	173.63	0.776	0.473771	5971.31	5871.51	5984.61	6386.51	5991.1	5876.46	5712.81	5853.56	5678.41	6239.36	6505.27	6485.44
200073_s_at	HNRPD: heterogeneous nuclear ribonucleoprotein D (AU-rich element RNA binding protein 1, 37kDa)	M94630	3184	g181913	8802.12	8252.43	-1.07	-1.01	-1.13	-549.69	-2.034	0.093603	8802.12	9010.4	1.02	0.99	1.06	208.28	1.192	0.292421	8647.8	8440.27	9030.7	9089.7	8293.13	8832.93	7775.74	8107.93	9017.22	9071.82	9163.78	8788.77
200074_s_at	LOC649821 /// RPL14 /// RPL14L: ribosomal protein L14 /// ribosomal protein L14-like /// similar to 60S ribosomal protein L14 (CAG-ISL 7)	U16738	144581 /// 649821 /// 9045	g608516	10583.4	11085	1.05	1.03	1.07	501.59	3.7	0.010115	10583.4	11150.6	1.05	0.94	1.17	567.18	0.788	0.486538	10759.1	10744.6	10437.9	10392	11028.4	11163.7	10854.5	11293.1	9058.89	11419.9	12038.3	12085.2
200075_s_at	GUK1: guanylate kinase 1	BC006249	2987	g13623296	2817.13	3529.91	1.25	1.04	1.47	712.78	1.96	0.13764	2817.13	3126.05	1.11	1.04	1.19	308.92	2.481	0.051516	3002.95	2856.06	2745.05	2664.47	4097.59	4189.91	2842.38	2989.77	2834.74	3219.65	3289.72	3160.09
200076_s_at	C19orf50: chromosome 19 open reading frame 50	BC006479	79036	g13623702	750.58	821.25	1.09	0.99	1.2	70.68	1.558	0.199606	750.58	666.56	-1.13	-1.02	-1.25	-84.02	-1.977	0.12241	724.5	741.25	742.98	793.58	751.4	742.92	899.4	891.29	760.64	703.15	589.48	612.96
200077_s_at	OAZ1: ornithine decarboxylase antizyme 1	D87914	4946	g1590807	11280.3	12391.2	1.1	1.07	1.13	1110.91	5.875	0.006031	11280.3	11786.5	1.04	1.01	1.08	506.24	2.187	0.073559	10923.9	11017	11544.2	11636.1	12407.5	12530.5	12361.9	12265	11388.5	11892.1	12070.4	11795.2
200078_s_at	ATP6V0B: ATPase, H+ transporting, lysosomal 21kDa, V0 subunit b	BC005876	533	g13543437	3585.08	4588.1	1.28	1.2	1.37	1003.02	5.499	0.008635	3585.08	3946.87	1.1	0.99	1.21	361.79	1.531	0.217348	3499.12	3569.86	3562.39	3708.96	4372.28	4203.1	4903.32	4873.7	3445.94	3699.37	4155.6	4486.57
200079_s_at	KARS: lysyl-tRNA synthetase	AF285758	3735	g11095908	5642.11	3887.68	-1.45	-1.12	-2.06	-1754.43	-2.489	0.085607	5642.11	5158.88	-1.09	-1.06	-1.13	-483.22	-4.864	0.01061	5698.21	5851.46	5397.44	5621.32	2702.44	2659.09	4973.76	5215.43	5159.65	5244.51	5122.43	5108.93
200080_s_at	H3F3A /// LOC440926 /// LOC644914: H3 histone, family 3A /// H3 histone, family 3A pseudogene /// similar to H3 histone, family 3B	AI955655	3020 /// 440926 /// 644914	Hs.181307.5	14632.6	12238.5	-1.2	-0.91	-1.74	-2394.02	-1.028	0.378728	14632.6	15089.6	1.03	1.01	1.06	457.04	2.131	0.107115	14236.3	14325.2	14977.4	14991.3	16426.2	16076.4	7935.28	8516.27	15145.1	14905.9	15091.2	15216.1
200081_s_at	RPS6: ribosomal protein S6	BE741754	6194	Hs.241507.3	18122.8	17681.5	-1.02	-1.01	-1.04	-441.32	-2.228	0.072291	18122.8	18163.2	1	0.95	1.05	40.35	0.074	0.94531	18368.8	17895.4	17962.8	18264.4	17720.6	17346.7	18108.4	17550.3	16607.9	19003.1	18395.8	18646
200082_s_at	LOC644315 /// RPS7: ribosomal protein S7 /// similar to 40S ribosomal protein S7 (S8)	AI805587	6201 /// 644315	Hs.301547.2	17745.6	18148.7	1.02	1	1.05	403.09	1.575	0.174675	17745.6	17751.7	1	0.98	1.02	6.13	0.027	0.979614	17953.7	17387.7	17666	17975.1	18373.3	18626.8	17919.1	17675.6	17683.9	18172.8	17295.5	17854.7
200083_at	USP22: ubiquitin specific peptidase 22	AA621731	23326	Hs.12064.0	4084.09	4584.14	1.12	1.06	1.18	500.05	3.44	0.016562	4084.09	4016.65	-1.02	-0.88	-1.2	-67.44	-0.179	0.868395	4319.16	4067.79	4014.13	3935.29	4851.36	4714.67	4343.52	4427.01	3126.46	3700.71	4586.22	4653.21
200084_at	C11orf58: chromosome 11 open reading frame 58	BE748698	10944	Hs.78050.1	5784.75	5773.41	-1	-0.97	-1.03	-11.34	-0.103	0.922215	5784.75	5790.92	1	0.97	1.03	6.17	0.062	0.952538	5821.14	5882.55	5812.19	5623.12	5977.72	5892.29	5606.98	5616.67	5828.25	6005.31	5679.81	5650.3
200085_s_at	TCEB2: transcription elongation factor B (SIII), polypeptide 2 (18kDa, elongin B)	NM_007108	6923	Hs.172772.2	6215.33	7233.8	1.16	1.08	1.24	1018.47	3.426	0.036184	6215.33	6486.52	1.04	1.01	1.08	271.19	1.892	0.125107	6219.15	6261.35	6040.04	6340.76	7521.14	7901.96	6870.71	6641.38	6345.1	6354.76	6374.82	6871.39
200086_s_at	COX4I1: cytochrome c oxidase subunit IV isoform 1	AA854966	1327	Hs.113205.2	8407.28	8460.25	1.01	0.99	1.03	52.97	0.501	0.637329	8407.28	8308.44	-1.01	-0.99	-1.04	-98.83	-0.795	0.456969	8496.87	8611.13	8217.95	8303.16	8589.95	8343.67	8513.97	8393.4	8211.87	8566.5	8216.3	8239.09
200087_s_at	TMED2: transmembrane emp24 domain trafficking protein 2	AK024976	10959	Hs.75914.0	6768.02	6163.49	-1.1	-1.01	-1.2	-604.53	-1.96	0.138473	6768.02	6321.65	-1.07	-1.01	-1.13	-446.37	-2.103	0.11341	6757.36	6712.78	6934.72	6667.21	5823.85	5482.88	6701.88	6645.34	6046.09	5900.27	6629.89	6710.36
200088_x_at	RPL12: ribosomal protein L12	AK026491	6136	Hs.182979.1	14309.8	13765	-1.04	-0.96	-1.13	-544.73	-0.795	0.462347	14309.8	14766.5	1.03	0.98	1.09	456.71	1.016	0.352696	15062.5	14678.5	13375.1	14123	12726.8	12800.7	14683.1	14849.6	14014.5	14859.5	15197.2	14994.8
200089_s_at	RPL4: ribosomal protein L4	AI953886	6124	Hs.286.4	16930	15480	-1.09	-1.02	-1.18	-1449.98	-2.089	0.12688	16930	17493.6	1.03	1.02	1.04	563.62	5.187	0.004234	17065.6	16949.4	16817.2	16887.7	14251.4	14312.5	16624.4	16731.8	17261.5	17423.2	17601.4	17688.4
200090_at	FNTA: farnesyltransferase, CAAX box, alpha	BG168896	2339	Hs.138381.1	3151.06	3866.56	1.23	1.06	1.4	715.51	2.284	0.081988	3151.06	4012.17	1.27	1.19	1.37	861.12	6.386	0.004145	3478.49	3230.38	2950.39	2944.98	4329.91	4381.46	3269.3	3485.58	4055.74	4013.92	4087.01	3892.02
200091_s_at	RPS25: ribosomal protein S25	AA888388	6230	Hs.113029.1	15901.1	13469	-1.18	-0.99	-1.45	-2432.18	-1.579	0.211855	15901.1	15810.5	-1.01	-0.96	-1.05	-90.58	-0.218	0.840333	15695.2	16076.5	16044.4	15788.4	15962.5	16295.8	10723.6	10894	15028.8	15194.3	16543.3	16475.9
200092_s_at	RPL37: ribosomal protein L37	BF216701	6167	Hs.179779.1	17372.5	16856.4	-1.03	-0.99	-1.07	-516.15	-1.345	0.238839	17372.5	17921.4	1.03	1.01	1.05	548.86	2.54	0.056381	17177.9	17198.2	17944.6	17169.5	16218.8	16354.4	17321.5	17530.8	17942.3	18157.5	17923.8	17662
200093_s_at	HINT1: histidine triad nucleotide binding protein 1	N32864	3094	Hs.256697.2	10991	10559.3	-1.04	-1.01	-1.07	-431.72	-2.468	0.081372	10991	11291.8	1.03	0.98	1.07	300.85	1.02	0.380062	11057.4	11042.5	10876.2	10987.9	10593.6	10901.7	10090.3	10651.4	10540.5	11117.9	11751.3	11757.6
200094_s_at	EEF2: eukaryotic translation elongation factor 2	AI004246	1938	Hs.75309.1	10897.7	10455.3	-1.04	-0.99	-1.1	-442.41	-1.302	0.252282	10897.7	11515.9	1.06	1.03	1.09	618.15	3.329	0.02714	11046.3	11305.1	10613.4	10626	9911.4	10031.7	10715	11163.1	11718	11426.5	11548.5	11370.4
200095_x_at	RPS10: ribosomal protein S10	AA320764	6204	Hs.76230.2	16574.4	17232.7	1.04	1.01	1.07	658.26	2.011	0.124947	16574.4	16782.4	1.01	1	1.03	207.96	1.571	0.167363	16456.9	16840	16465.3	16535.3	17797.4	17715	16919.6	16498.6	16513.2	16824.2	16817.4	16974.6
200096_s_at	ATP6V0E1: ATPase, H+ transporting, lysosomal 9kDa, V0 subunit e1	AI862255	8992	Hs.24322.2	2276.53	3551.05	1.56	1.39	1.77	1274.52	7.653	0.003288	2276.53	2462.75	1.08	0.82	1.38	186.22	0.495	0.644823	1929.34	2070.63	2530.6	2575.55	3541.36	3615.81	3594.58	3452.44	1543.68	2356.65	2964.17	2986.5
200097_s_at	HNRPK: heterogeneous nuclear ribonucleoprotein K	AI701949	3190	Hs.129548.1	7185.33	7316.89	1.02	0.89	1.18	131.57	0.214	0.839911	7185.33	7715.39	1.07	0.94	1.24	530.06	0.854	0.435394	7773.87	5551.47	7834.86	7581.11	7976.26	7582.12	6906.45	6802.74	7045.34	7489.87	7911.3	8415.04
200098_s_at	ANAPC5: anaphase promoting complex subunit 5	T33068	51433	Hs.7101.1	2981.24	3261.04	1.09	1	1.2	279.8	1.616	0.157166	2981.24	3205.61	1.08	1	1.16	224.37	1.747	0.163066	3215.42	2637.65	3022.55	3049.33	3456.59	3486.87	3084.65	3016.03	3216.98	3114.9	3184.88	3305.67
200099_s_at	LOC439992 /// RPS3A: ribosomal protein S3A /// similar to ribosomal protein S3a	AL356115	439992 /// 6189	Hs.307132.0	20596.2	20433.2	-1.01	-0.99	-1.02	-162.99	-0.897	0.418119	20596.2	20924	1.02	0.98	1.05	327.87	0.733	0.504938	20501.2	20733.2	20961.2	20188.9	20622	20287.5	20488.8	20334.3	19724.6	21610	21052.3	21309.1
200593_s_at	HNRNPU: heterogeneous nuclear ribonucleoprotein U (scaffold attachment factor A)	BC003621	3192	g13177672	5497.29	5354.47	-1.03	-0.98	-1.07	-142.82	-1.007	0.382144	5497.29	4021.22	-1.37	-1.1	-1.8	-1476.07	-2.528	0.085104	5455.51	5521.1	5441.66	5570.91	5724.5	5248.95	5068.42	5376.03	2478.42	3758.94	4944.13	4903.41
200594_x_at	HNRNPU: heterogeneous nuclear ribonucleoprotein U (scaffold attachment factor A)	NM_004501	3192	g4758545	10670.6	10631.4	-1	-0.98	-1.03	-39.21	-0.238	0.826664	10670.6	9751.48	-1.09	-0.98	-1.23	-919.14	-1.391	0.258084	10659.1	10603.4	10705.9	10714.1	10786.8	11003.5	10458.7	10276.6	8151.65	9185.68	10880.3	10788.3
200595_s_at	EIF3A: eukaryotic translation initiation factor 3, subunit A	NM_003750	8661	g4503508	4613.72	4171.41	-1.11	-1.06	-1.16	-442.32	-3.453	0.027737	4613.72	4322.39	-1.07	-0.82	-1.52	-291.33	-0.368	0.736379	4781.37	4394.01	4857.2	4422.32	4225.4	4265.95	4126.09	4068.19	5833.23	5512.46	3033.89	2910
200596_s_at	EIF3A: eukaryotic translation initiation factor 3, subunit A	BE614908	8661	Hs.198899.0	4732.28	4989.67	1.05	0.98	1.13	257.39	1.27	0.286233	4732.28	4386.42	-1.08	-0.92	-1.3	-345.86	-0.77	0.496623	4826.1	4709.12	4621.7	4772.21	5323.71	5227.29	4441.14	4966.55	4853.32	5412.61	3726.01	3553.73
200597_at	EIF3A: eukaryotic translation initiation factor 3, subunit A	AI123320	8661	Hs.198899.0	741.92	661.75	-1.12	-0.98	-1.3	-80.17	-1.366	0.226933	741.92	795.68	1.07	0.82	1.34	53.76	0.465	0.668973	828.02	702.41	758.47	678.77	756.57	733.38	570.59	586.46	995.77	974.47	646.57	565.91
200598_s_at	HSP90B1: heat shock protein 90kDa beta (Grp94), member 1	AI582238	7184	Hs.82689.0	6414.84	6668.76	1.04	0.9	1.21	253.92	0.434	0.680671	6414.84	5775.08	-1.11	-0.93	-1.33	-639.76	-0.971	0.368908	6607.59	5056.48	7062.1	6933.18	6302.35	5849.15	7397.36	7126.17	4481.38	5722.09	6610.82	6286.01
200599_s_at	HSP90B1: heat shock protein 90kDa beta (Grp94), member 1	NM_003299	7184	g4507676	6950.2	7204.78	1.04	0.93	1.15	254.58	0.538	0.616488	6950.2	6735.3	-1.03	-0.92	-1.16	-214.9	-0.448	0.67541	7152.87	6315.54	7077.32	7255.07	6611.58	6354.96	8029.26	7823.33	6086.35	5908.78	7378.98	7567.11
200600_at	MSN: moesin	NM_002444	4478	g4505256	7592.64	7206.63	-1.05	-0.95	-1.18	-386.01	-0.796	0.47857	7592.64	7145.13	-1.06	-1.03	-1.1	-447.51	-2.797	0.03129	7531.48	7295.69	7757.64	7785.74	6344.09	6443.57	8113.79	7925.08	6886.65	7040.29	7385.54	7268.03
200601_at	ACTN4: actinin, alpha 4	U48734	81	g3157975	413.21	494.42	1.2	1.08	1.32	81.21	3.013	0.023828	413.21	715.96	1.73	1.08	2.41	302.75	1.851	0.15853	402.82	361.7	449.33	438.99	536.81	470.56	512.12	458.22	1191.6	462.95	580.63	628.68
200602_at	APP: amyloid beta (A4) precursor protein (peptidase nexin-II, Alzheimer disease)	NM_000484	351	g4502166	22.32	24.77	1.11	0.85	1.52	2.45	0.62	0.56294	22.32	42.6	1.91	1.36	2.71	20.28	3.01	0.03117	30.57	14.45	20.18	24.08	27.9	28.41	19.94	22.84	38.51	28.05	53.47	50.38
200603_at	PRKAR1A: protein kinase, cAMP-dependent, regulatory, type I, alpha (tissue specific extinguisher 1)	AL050038	5573	Hs.183037.0	4148.61	4415.18	1.06	1	1.13	266.57	1.733	0.158142	4148.61	2948.69	-1.41	-1.21	-1.69	-1199.92	-3.996	0.02433	4256.75	4064.44	4242.37	4030.88	4108.15	4243.49	4609.37	4699.72	2326.04	2567.59	3494.55	3406.58
200604_s_at	PRKAR1A: protein kinase, cAMP-dependent, regulatory, type I, alpha (tissue specific extinguisher 1)	M18468	5573	g1526988	200.55	272.21	1.36	1.18	1.56	71.65	3.578	0.013791	200.55	134.69	-1.49	-1.27	-1.75	-65.86	-4.216	0.005754	209.79	228.71	176.51	187.2	233.93	256.41	297.96	300.52	106.83	138.07	157.09	136.78
200605_s_at	PRKAR1A: protein kinase, cAMP-dependent, regulatory, type I, alpha (tissue specific extinguisher 1)	NM_002734	5573	g4506062	3204.8	3673.33	1.15	1.07	1.23	468.53	3.209	0.02432	3204.8	2353.8	-1.36	-1.06	-1.91	-851.01	-2.048	0.127216	3245.89	3043.48	3393.12	3136.72	3394.22	3529.82	3877.22	3892.06	1345.97	2032.09	3040.73	2996.39
200607_s_at	RAD21: RAD21 homolog (S. pombe)	BG289967	5885	Hs.81848.0	2742.53	2711.4	-1.01	-0.93	-1.1	-31.13	-0.223	0.834082	2742.53	2914.96	1.06	0.95	1.18	172.44	0.891	0.428241	2867.17	2779.65	2739.94	2583.35	3002.45	2446.87	2834.59	2561.68	2364.79	3060.99	3144.74	3089.34
200608_s_at	RAD21: RAD21 homolog (S. pombe)	NM_006265	5885	g5453993	7313.87	6703.12	-1.09	-1	-1.19	-610.75	-1.725	0.172991	7313.87	7802.97	1.07	1.03	1.11	489.1	2.903	0.03507	7216.16	7466.68	7447.6	7125.03	6245.71	6003.76	7440.49	7122.49	8027.09	8043.37	7432.54	7708.89
200609_s_at	WDR1: WD repeat domain 1	NM_017491	9948	g9257256	7874.25	6840.23	-1.15	-1.07	-1.25	-1034.02	-3.072	0.039203	7874.25	6769.82	-1.16	-1.07	-1.27	-1104.43	-3.196	0.035515	8176.47	7637.26	7945.7	7737.56	7409.38	7358.14	6244.57	6348.85	6080.85	6356.24	7256.88	7385.29
200610_s_at	NCL: nucleolin	NM_005381	4691	g4885510	11652.6	11335.3	-1.03	-0.99	-1.07	-317.28	-1.247	0.27945	11652.6	10698.7	-1.09	-0.97	-1.25	-953.85	-1.142	0.334261	11534.3	11549.3	11575.7	11951	11630.8	11813	11094.4	10803	9450.91	9089.86	12010.7	12243.5
200611_s_at	WDR1: WD repeat domain 1	AB010427	9948	g5103672	3274.82	2641.1	-1.24	-1.18	-1.3	-633.72	-7.247	0.000496	3274.82	2287.4	-1.43	-1.37	-1.5	-987.42	-12.249	8.8e-05	3120.07	3248.84	3270.45	3459.9	2698.49	2486.17	2669.86	2709.86	2300.02	2395.33	2228.71	2225.53
200612_s_at	AP2B1: adaptor-related protein complex 2, beta 1 subunit	NM_001282	163	g4557468	1436.54	1156.19	-1.24	-0.98	-1.7	-280.35	-1.459	0.229873	1436.54	1711.35	1.19	1.01	1.38	274.81	1.713	0.169606	1570.37	1448.65	1357.38	1369.77	821.23	848.06	1487.49	1467.98	2104.17	1787.98	1406.64	1546.63
200613_at	AP2M1: adaptor-related protein complex 2, mu 1 subunit	NM_004068	1173	g4757993	1055.1	712.8	-1.48	-1.12	-2.18	-342.3	-2.442	0.088788	1055.1	1512.28	1.43	0.91	1.96	457.18	1.373	0.262645	1015.33	1066.4	1031	1107.66	986.36	917.07	480.1	467.66	2488.61	1001.24	1312.22	1247.04
200614_at	CLTC: clathrin, heavy chain (Hc)	NM_004859	1213	g4758011	4947.36	5978.83	1.21	0.9	1.7	1031.47	1.036	0.343535	4947.36	6613.97	1.34	1.05	1.83	1666.61	2.05	0.129053	3548.79	3559.01	6335.77	6345.89	4974.18	4954.45	7019.99	6966.69	6313.52	6584.18	6679.45	6878.74
200615_s_at	AP2B1: adaptor-related protein complex 2, beta 1 subunit	AL567295	163	Hs.74626.0	365.89	385.47	1.05	0.88	1.24	19.57	0.491	0.653946	365.89	305.86	-1.2	-1.1	-1.31	-60.04	-3.452	0.018381	365.01	341.47	384.48	372.62	323.29	314.95	437.2	466.43	282.11	286.6	347.13	307.59
200616_s_at	KIAA0152: KIAA0152	BC000371	9761	g12653206	3287.78	2767.61	-1.19	-1.11	-1.28	-520.16	-4.289	0.011053	3287.78	2418.11	-1.36	-1.12	-1.73	-869.67	-2.748	0.066791	3325.34	3139.32	3307.64	3378.82	2955.92	2949.55	2522.16	2642.83	1763.74	2004.34	2964	2940.37
200617_at	KIAA0152: KIAA0152	NM_014730	9761	g7661947	1034.48	596.27	-1.73	-1.48	-2.1	-438.21	-6.95	0.005745	1034.48	830.95	-1.24	-1.07	-1.49	-203.52	-2.425	0.092827	1049.28	1023.44	1025.38	1039.8	741.95	658.69	507.71	476.73	957.48	586.49	864.01	915.82
200618_at	LASP1: LIM and SH3 protein 1	NM_006148	3927	g5453709	3004.93	3172.43	1.06	0.76	1.36	167.5	0.303	0.780552	3004.93	2936.91	-1.02	-0.93	-1.13	-68.02	-0.387	0.716116	2938.03	2810.87	3179.72	3091.1	2230.44	2224.96	4167.19	4067.12	2546.69	2826.79	3205.88	3168.29
200619_at	SF3B2: splicing factor 3b, subunit 2, 145kDa	NM_006842	10992	g5803154	3078.56	2678.2	-1.15	-1.09	-1.21	-400.36	-4.594	0.00877	3078.56	3528.69	1.15	1.11	1.18	450.13	7.369	0.000447	3179.77	3050.96	3006.38	3077.14	2877.65	2596.17	2515.75	2723.22	3549.15	3386.36	3604.63	3574.63
200620_at	TMEM59: transmembrane protein 59	NM_004872	9528	g4758571	2012.25	2501.3	1.24	1.16	1.33	489.05	4.939	0.00408	2012.25	1663.32	-1.21	-0.94	-1.69	-348.93	-1.21	0.307828	2069.82	2134.01	1926.11	1919.05	2578.8	2698.59	2382.91	2344.9	1149.95	1195.71	2133.61	2174
200621_at	CSRP1: cysteine and glycine-rich protein 1	NM_004078	1465	g4758085	632.06	726.79	1.15	1.07	1.23	94.73	3.14	0.046759	632.06	723.01	1.14	0.89	1.4	90.95	0.916	0.42681	620.61	623.64	643.07	640.91	649.54	711.22	774.77	771.64	1003.76	721.82	580.31	586.16
200622_x_at	CALM3: calmodulin 3 (phosphorylase kinase, delta)	AV685208	808	Hs.141011.0	861.27	924.9	1.07	0.79	1.37	63.63	0.423	0.69654	861.27	630.37	-1.37	-1.16	-1.64	-230.9	-3.16	0.021364	788.94	793.3	886.24	976.59	692.92	662.64	1211.37	1132.66	467.97	739.26	639.11	675.14
200623_s_at	CALM3: calmodulin 3 (phosphorylase kinase, delta)	NM_005184	808	g4885108	1668.51	1890.98	1.13	1.07	1.21	222.47	3.43	0.017835	1668.51	2146.15	1.29	1.15	1.43	477.63	3.453	0.02535	1744.94	1506.97	1711.28	1710.86	1992.48	1844.33	1885.17	1841.94	2498.09	1891.19	2081.26	2114.05
200624_s_at	MATR3: matrin 3	AA577695	9782	Hs.78825.0	4796.95	4796.98	1	0.95	1.05	0.03	0	0.999852	4796.95	4753.45	-1.01	-0.93	-1.1	-43.5	-0.174	0.87084	4671	4917.78	4973.49	4625.53	4556.65	4621.83	5021.54	4987.9	4138.68	5227.91	4977.92	4669.28
200625_s_at	CAP1: CAP, adenylate cyclase-associated protein 1 (yeast)	NM_006367	10487	g10938021	3891.13	3579.61	-1.09	-1.03	-1.14	-311.52	-2.791	0.033321	3891.13	3304.07	-1.18	-0.98	-1.47	-587.06	-1.468	0.233398	3978.02	3796.79	4037.94	3751.77	3436.65	3432.8	3787.93	3661.06	2673.4	2572.42	4012.83	3957.63
200626_s_at	MATR3: matrin 3	NM_018834	9782	g10047081	6875.47	7083.81	1.03	0.98	1.09	208.34	0.89	0.424688	6875.47	7662.66	1.11	1.05	1.18	787.19	3.296	0.028256	7128.02	6269.99	7247.39	6856.5	7127.1	6866.71	7279.65	7061.79	7791.94	7863.32	7452.7	7542.7
200627_at	PTGES3: prostaglandin E synthase 3 (cytosolic)	BC003005	10728	g12804292	11323.9	12173.2	1.08	1.06	1.09	849.31	7.056	0.002004	11323.9	8530.73	-1.33	-1.1	-1.68	-2793.19	-2.561	0.082843	11373.8	11216	11427.5	11278.4	12346.5	12346	12116.6	11883.8	5939.65	7515.24	10309.7	10358.3
200628_s_at	WARS: tryptophanyl-tRNA synthetase	M61715	7453	g340367	485.92	423.35	-1.15	-1.06	-1.24	-62.58	-2.868	0.033036	485.92	405.02	-1.2	-1	-1.49	-80.91	-1.626	0.181303	453.98	456.59	525.57	507.56	455.33	421.66	420.61	395.79	287.18	375.02	485.5	472.37
200629_at	WARS: tryptophanyl-tRNA synthetase	NM_004184	7453	g7710155	1270.14	1081.57	-1.17	-1.11	-1.24	-188.57	-4.292	0.011737	1270.14	1255.08	-1.01	-0.89	-1.16	-15.06	-0.149	0.888845	1327.13	1351.03	1203.52	1198.88	1032.44	1079.23	1114.67	1099.95	1174.82	1032.26	1377.58	1435.67
200630_x_at	SET: SET translocation (myeloid leukemia-associated)	AV702810	6418	Hs.145279.0	10934.1	11339.3	1.04	0.98	1.09	405.2	1.103	0.345221	10934.1	9227.85	-1.18	-1.09	-1.3	-1706.23	-3.541	0.035662	11032	10830.2	10791.3	11082.7	12288.5	11507.8	10821.5	10739.2	10213.3	9850.97	8236.4	8610.72
200631_s_at	SET: SET translocation (myeloid leukemia-associated)	NM_003011	6418	g4506890	8982.9	8817.49	-1.02	-0.97	-1.07	-165.41	-0.625	0.555378	8982.9	6386.75	-1.41	-1.28	-1.56	-2596.15	-6.299	0.002756	8512.17	8949.1	9208.38	9261.96	9049.03	9266.61	8452.16	8502.18	6715.92	7287.38	5847.77	5695.96
200632_s_at	NDRG1: N-myc downstream regulated gene 1	NM_006096	10397	g5174656	413.36	426.56	1.03	0.67	1.41	13.19	0.143	0.894814	413.36	332.62	-1.24	-0.94	-1.81	-80.74	-1.245	0.290884	462.58	396.25	410.46	384.17	565.18	600.71	278.17	262.17	448.05	433.46	221.87	227.09
200633_at	UBB: ubiquitin B	NM_018955	7314	g11024713	13579.5	14668.3	1.08	1.03	1.13	1088.8	2.927	0.02738	13579.5	14065.6	1.04	0.97	1.11	486.06	0.855	0.438294	13327.2	13053.5	13829	14108.5	15255.8	15060.2	14171	14186.3	13449.3	12940.3	14809	15063.8
200634_at	PFN1: profilin 1	NM_005022	5216	g4826897	9139.88	7500.82	-1.22	-1.18	-1.26	-1639.06	-9.935	9.3e-05	9139.88	9779.75	1.07	0.9	1.24	639.87	0.667	0.551004	8818.18	9134.13	9144.26	9462.93	7636.11	7243	7447.05	7677.1	12631.3	8821.04	8865.22	8801.42
200635_s_at	PTPRF: protein tyrosine phosphatase, receptor type, F	AU145351	5792	Hs.75216.0	63.82	54.06	-1.18	-0.79	-1.79	-9.76	-0.695	0.513301	63.82	43.01	-1.48	-1.02	-2.13	-20.81	-1.738	0.142706	45.89	47.45	75.2	86.74	54.56	78.65	31.4	51.65	57.06	36.29	29.16	49.53
200638_s_at	YWHAZ: tyrosine 3-monooxygenase/tryptophan 5-monooxygenase activation protein, zeta polypeptide	BC003623	7534	g13177678	5992.21	6813.37	1.14	1.1	1.17	821.15	7.049	0.000411	5992.21	4114.03	-1.46	-1.2	-1.86	-1878.19	-3.463	0.037865	6098.3	6018.68	6095.3	5756.57	6665.35	6862.44	7029.45	6696.23	4617.84	5386.57	3253.65	3198.05
200639_s_at	YWHAZ: tyrosine 3-monooxygenase/tryptophan 5-monooxygenase activation protein, zeta polypeptide	NM_003406	7534	g4507952	5975.65	6115.7	1.02	0.95	1.1	140.04	0.499	0.644083	5975.65	4288.99	-1.39	-1.35	-1.44	-1686.66	-14.491	8.4e-05	6056.18	5682.67	6176.34	5987.43	6737.1	6344.57	5614.99	5766.12	4408.21	4326.69	4241.33	4179.73
200640_at	YWHAZ: tyrosine 3-monooxygenase/tryptophan 5-monooxygenase activation protein, zeta polypeptide	NM_003406	7534	g4507952	4698.32	4853.82	1.03	0.93	1.14	155.49	0.521	0.635389	4698.32	2943.14	-1.6	-1.49	-1.72	-1755.19	-12.309	0.000106	4901.29	4631.06	4625.09	4635.86	5372.05	5315.31	4528.62	4199.29	2604.17	2901.96	3124.34	3142.08
200641_s_at	YWHAZ: tyrosine 3-monooxygenase/tryptophan 5-monooxygenase activation protein, zeta polypeptide	U28964	7534	g899458	2439.25	2981.03	1.22	1.15	1.3	541.78	5.761	0.00667	2439.25	1188.78	-2.05	-1.49	-3.27	-1250.47	-4.434	0.013748	2544.71	2170.11	2500.68	2541.51	3001.83	3046.06	2936.73	2939.51	702.08	1951.34	1047.58	1054.09
200642_at	SOD1: superoxide dismutase 1, soluble (amyotrophic lateral sclerosis 1 (adult))	NM_000454	6647	g4507148	12047.9	12981.5	1.08	0.96	1.19	933.6	1.107	0.344996	12047.9	10039.5	-1.2	-1	-1.5	-2008.33	-1.622	0.200993	11992.7	11876.9	11864.8	12457.1	14287.7	14549.1	11530.6	11558.4	7383.11	8509.07	12149.6	12116.3
200643_at	HDLBP: high density lipoprotein binding protein (vigilin)	NM_005336	3069	g4885408	772.91	768.72	-1.01	-0.83	-1.27	-4.19	-0.042	0.968753	772.91	878.66	1.14	1.02	1.26	105.75	1.904	0.117174	719.53	729.42	816.21	826.47	619.77	594.35	978.92	881.85	1018.08	799.42	844.8	852.35
200644_at	MARCKSL1: MARCKS-like 1	NM_023009	65108	g13491173	5786.67	4265.18	-1.36	-1.09	-1.79	-1521.49	-2.367	0.086764	5786.67	4848.41	-1.19	-1.1	-1.29	-938.26	-3.695	0.010184	5659.55	5358.35	6150.6	5978.19	5428.52	5237.89	3254.68	3139.63	4569.48	4493.77	5148.15	5182.25
200645_at	GABARAP: GABA(A) receptor-associated protein	NM_007278	11337	g6005763	4145.48	4071.31	-1.02	-0.96	-1.08	-74.18	-0.514	0.630051	4145.48	4294.56	1.04	0.96	1.11	149.07	0.79	0.473696	4284.04	4171.47	3941.82	4184.61	3909.69	3813.2	4337.38	4224.97	4371.16	3816.72	4337.42	4652.92
200646_s_at	NUCB1: nucleobindin 1	NM_006184	4924	g5453817	54.77	51.81	-1.06	-0.86	-1.27	-2.96	-0.464	0.664525	54.77	48.38	-1.13	-0.91	-1.38	-6.39	-0.967	0.378717	62.29	50.85	40.57	65.35	44.51	51.28	58.73	52.72	40.64	57.17	48.02	47.69
200647_x_at	EIF3C /// EIF3CL: eukaryotic translation initiation factor 3, subunit C /// eukaryotic translation initiation factor 3, subunit C-like	NM_003752	728689 /// 8663	g5579457	7585.81	5204.59	-1.46	-1.23	-1.79	-2381.21	-4.031	0.024494	7585.81	8315.24	1.1	1.03	1.17	729.43	2.341	0.084287	7641.43	7365.97	7493.05	7842.78	4228.36	4168.57	6282.38	6139.06	8629.9	7434.26	8555.21	8641.59
200648_s_at	GLUL: glutamate-ammonia ligase (glutamine synthetase)	NM_002065	2752	g4504026	903.26	455.36	-1.98	-1.85	-2.12	-447.9	-13.028	0.000573	903.26	516.25	-1.75	-1.37	-2.39	-387.01	-4.314	0.012886	832.8	868.78	985.66	925.81	460.77	446.22	439.76	474.7	561.98	727.86	427.37	347.81
200649_at	NUCB1: nucleobindin 1	BC002356	4924	g12803104	204.75	232.02	1.13	0.98	1.29	27.27	1.416	0.24166	204.75	204.68	-1	-0.88	-1.15	-0.07	-0.004	0.996811	190.89	206.72	212.43	208.95	195.63	204.46	259.15	268.85	230.84	161.02	223.89	202.96
200650_s_at	LDHA: lactate dehydrogenase A	NM_005566	3939	g5031856	13403.3	13479.3	1.01	0.96	1.05	75.97	0.195	0.855642	13403.3	13181.5	-1.02	-1	-1.04	-221.89	-1.459	0.19874	13229.2	13161.4	13652.2	13570.5	14150.4	14048.4	13078.2	12640.2	13328.9	13344.3	12992.7	13059.9
200651_at	GNB2L1: guanine nucleotide binding protein (G protein), beta polypeptide 2-like 1	NM_006098	10399	g5174446	14996.4	14876.5	-1.01	-0.98	-1.04	-119.9	-0.42	0.689717	14996.4	15524.8	1.04	1.01	1.06	528.36	2.748	0.050677	15198.7	14920	14533	15333.8	14557.5	14489.4	15454.1	15005	15655.6	15337	15638.2	15468.3
200652_at	SSR2: signal sequence receptor, beta (translocon-associated protein beta)	NM_003145	6746	g6552341	3258.69	3644.11	1.12	0.93	1.31	385.42	1.046	0.369531	3258.69	3379.66	1.04	0.95	1.13	120.97	0.66	0.549162	3212.54	3197.79	3200.89	3423.54	3016.38	3009.46	4260.05	4290.57	2881.62	3392.99	3599.29	3644.76
200653_s_at	CALM1: calmodulin 1 (phosphorylase kinase, delta)	M27319	801	g179809	2308.96	2704.82	1.17	0.95	1.39	395.86	1.293	0.283531	2308.96	2478.02	1.07	0.95	1.2	169.06	0.942	0.409402	2229.12	2425.2	2282.91	2298.62	2287.21	2114.81	3017.06	3400.21	1965.57	2591.33	2751.82	2603.37
200654_at	P4HB: procollagen-proline, 2-oxoglutarate 4-dioxygenase (proline 4-hydroxylase), beta polypeptide	J02783	5034	g339646	2820.57	2827.62	1	0.78	1.28	7.05	0.017	0.987022	2820.57	2341.79	-1.2	-0.98	-1.45	-478.78	-1.5	0.208767	3400.82	3260.05	2325.9	2295.51	2328.67	2329.34	3449.38	3203.1	2623.19	2454.68	2102.91	2186.37
200655_s_at	CALM1: calmodulin 1 (phosphorylase kinase, delta)	NM_006888	801	g5901911	4693.23	4151.81	-1.13	-0.93	-1.44	-541.42	-0.992	0.392183	4693.23	5097.7	1.09	0.98	1.2	404.47	1.302	0.276217	4491.63	4771.83	4786.71	4722.75	3054.12	3389.99	5045.07	5118.06	5697.57	5524.41	4712.61	4456.2
200656_s_at	P4HB: procollagen-proline, 2-oxoglutarate 4-dioxygenase (proline 4-hydroxylase), beta polypeptide	NM_000918	5034	g4505566	1595.66	1512.77	-1.05	-0.82	-1.37	-82.89	-0.346	0.741226	1595.66	1254.32	-1.27	-1.06	-1.49	-341.33	-2.122	0.113614	1874.64	1856.62	1326.13	1325.24	1226.44	1172.27	1853.63	1798.74	1258.75	1364.36	1203.9	1190.28
200657_at	SLC25A5: solute carrier family 25 (mitochondrial carrier; adenine nucleotide translocator), member 5	NM_001152	292	g4502098	9125.35	6673.77	-1.37	-0.98	-2.24	-2451.58	-1.551	0.218458	9125.35	8957.41	-1.02	-0.98	-1.06	-167.94	-0.884	0.428242	9289.77	9179.06	8994.26	9038.29	3901.95	3976.32	9294.1	9522.71	8447.64	9022.43	9093.11	9266.45
200658_s_at	PHB: prohibitin	AL560017	5245	Hs.75323.0	5300.92	5230.83	-1.01	-0.97	-1.05	-70.09	-0.558	0.61219	5300.92	4058.74	-1.31	-1.17	-1.48	-1242.18	-4.282	0.02256	5337.11	5358.85	5256.83	5250.88	5467.3	5391.98	4934.62	5129.43	3250.41	4039.73	4520.74	4424.07
200659_s_at	PHB: prohibitin	NM_002634	5245	g6031190	1356.89	1095.13	-1.24	-1.14	-1.34	-261.76	-3.793	0.029967	1356.89	1504.86	1.11	1.01	1.22	147.97	1.808	0.128226	1463.64	1485.74	1228.02	1250.17	1109.68	1072.2	1113.05	1085.59	1637.38	1435.7	1467.99	1478.35
200661_at	CTSA: cathepsin A	NM_000308	5476	g4505988	783.83	1219.43	1.56	1.37	1.76	435.6	5.342	0.004169	783.83	909.32	1.16	0.95	1.39	125.5	1.219	0.291364	879.35	803.93	705.71	746.32	1076.42	1115.09	1322.94	1363.27	770.44	719.27	1055.39	1092.19
200662_s_at	TOMM20: translocase of outer mitochondrial membrane 20 homolog (yeast)	NM_014765	9804	g7657256	6704.94	6117.66	-1.1	-0.99	-1.2	-587.29	-1.503	0.209455	6704.94	7246.74	1.08	0.92	1.26	541.79	0.819	0.448748	7316.63	5660.16	7053.14	6789.85	5934.81	5822.22	6390.2	6323.4	6162.14	6427.87	8193.1	8203.84
200663_at	CD63: CD63 molecule	NM_001780	967	g4502678	2064.09	2455.54	1.19	1.14	1.24	391.45	7.039	0.002903	2064.09	2092.8	1.01	0.82	1.21	28.72	0.116	0.915087	2107.18	2078.34	2026.95	2043.87	2498.05	2556.73	2457.49	2309.89	1440.2	1979.42	2439.7	2511.9
200664_s_at	DNAJB1: DnaJ (Hsp40) homolog, subfamily B, member 1	BG537255	3337	Hs.82646.0	916.55	788.49	-1.16	-1.08	-1.25	-128.06	-3.341	0.023213	916.55	616.77	-1.49	-1.21	-1.9	-299.77	-3.46	0.02542	827.37	901.22	969.85	967.75	756.08	763.16	799.78	834.93	436.35	531.24	774.03	725.49
200665_s_at	SPARC: secreted protein, acidic, cysteine-rich (osteonectin)	NM_003118	6678	g4507170	559.02	698.41	1.25	1.17	1.32	139.39	5.547	0.009096	559.02	641.2	1.15	0.69	1.6	82.19	0.53	0.633045	573.38	550.95	551.1	560.63	659.95	657.65	759.97	716.05	363.93	385.47	954.69	860.73
200666_s_at	DNAJB1: DnaJ (Hsp40) homolog, subfamily B, member 1	NM_006145	3337	g5453689	2213.2	1980.62	-1.12	-1.03	-1.22	-232.58	-2.167	0.074305	2213.2	1671.3	-1.32	-0.98	-2.01	-541.9	-1.528	0.215203	2058.51	2090.91	2381.42	2321.98	1866.6	1853.89	2125.39	2076.6	1142.27	1007.81	2274.71	2260.42
200667_at	UBE2D3: ubiquitin-conjugating enzyme E2D 3 (UBC4/5 homolog, yeast)	BF448062	7323	Hs.118797.0	3260.98	3135.58	-1.04	-0.94	-1.14	-125.4	-0.631	0.570168	3260.98	4119.69	1.26	1.15	1.4	858.71	4.298	0.0195	2929.04	2935.49	3704.92	3474.47	3132.98	3177.13	3194.08	3038.16	4192.09	4187.65	4034.25	4064.76
200668_s_at	UBE2D3: ubiquitin-conjugating enzyme E2D 3 (UBC4/5 homolog, yeast)	BC003395	7323	g13097281	6318.97	7366.21	1.17	1.02	1.35	1047.24	1.965	0.140262	6318.97	6957.2	1.1	0.96	1.28	638.24	1.14	0.321684	5278.91	5542.37	7224.17	7230.43	7509.77	7488.2	7274.62	7192.26	6506.79	7426.65	6963.52	6931.86
200669_s_at	UBE2D3: ubiquitin-conjugating enzyme E2D 3 (UBC4/5 homolog, yeast)	NM_003340	7323	g4507776	5559.34	6250.74	1.12	0.99	1.29	691.4	1.504	0.20259	5559.34	5794.48	1.04	0.86	1.26	235.14	0.361	0.730572	4757.35	4927.98	6227.25	6324.77	6642.05	6535.84	5927.03	5898.03	4293.12	6294.41	6295.77	6294.59
200670_at	XBP1: X-box binding protein 1	NM_005080	7494	g4827057	3098.15	2036.6	-1.52	-1.33	-1.77	-1061.56	-5.929	0.00585	3098.15	1521.1	-2.04	-1.81	-2.33	-1577.06	-12.482	0.000181	3202.13	3125.35	3111.91	2953.24	1731.56	1749.08	2313.73	2352.01	1696.11	1737.05	1376.22	1275.01
200671_s_at	SPTBN1: spectrin, beta, non-erythrocytic 1	N92501	6711	Hs.107164.0	490.47	532.87	1.09	0.68	1.5	42.4	0.35	0.74833	490.47	265.37	-1.85	-1.65	-2.08	-225.1	-8.746	0.000206	497.66	510.45	523.85	429.94	770.31	706.45	325.52	329.18	297.11	282.42	230.2	251.75
200672_x_at	SPTBN1: spectrin, beta, non-erythrocytic 1	NM_003128	6711	g4507194	1176.17	994.85	-1.18	-0.91	-1.68	-181.31	-1.001	0.387896	1176.17	440.92	-2.67	-1.99	-4.02	-735.25	-7.825	0.00237	1241.04	1196.14	1118.44	1149.04	1344.96	1258.4	738.38	637.66	172.25	553.54	508.23	529.64
200673_at	LAPTM4A: lysosomal-associated protein transmembrane 4 alpha	NM_014713	9741	g13518239	2820.82	5002.98	1.77	1.26	2.92	2182.17	3.023	0.039354	2820.82	4476.84	1.59	1.04	2.7	1656.02	1.814	0.119937	1583.42	1751.33	4077.74	3870.78	4408.38	4677.52	5543.47	5382.57	3091.31	3758.48	5521.76	5535.8
200674_s_at	hCG_18290 /// RPL32: ribosomal protein L32 /// hCG18290	NM_000994	6161 /// 644907	g4506634	13669.1	14411.8	1.05	1.02	1.09	742.67	2.598	0.04745	13669.1	14948.5	1.09	1.06	1.13	1279.35	4.435	0.006589	13655.8	13258.6	13766.5	13995.5	14863.6	14725.6	14252.8	13805	15051.1	14242.5	15356.8	15143.4
200675_at	CD81: CD81 molecule	NM_004356	975	g4757943	5500.93	5618.6	1.02	0.9	1.14	117.67	0.288	0.790961	5500.93	5734.49	1.04	0.97	1.11	233.56	1.025	0.365023	5561.44	5435.1	5312.72	5694.46	6335.75	6287.38	4974.84	4876.44	5734.53	5133.56	6051.37	6018.5
200676_s_at	UBE2L3: ubiquitin-conjugating enzyme E2L 3	NM_003347	7332	g4507788	334.83	302.99	-1.11	-0.89	-1.45	-31.85	-0.719	0.522279	334.83	460.77	1.38	1.08	1.68	125.94	2.077	0.127377	346.12	345.74	321.39	326.08	348.34	404.14	225.27	234.2	636.94	438.19	371.92	396.03
200677_at	PTTG1IP: pituitary tumor-transforming 1 interacting protein	NM_004339	754	g11038670	3602.96	4356.7	1.21	1.11	1.3	753.74	3.663	0.031407	3602.96	2443.68	-1.47	-1.03	-2.56	-1159.28	-1.833	0.163584	3667.06	3503.51	3585.26	3656.01	3923.06	4101.09	4701.4	4701.27	1146.47	1575.95	3473.75	3578.56
200678_x_at	GRN: granulin	NM_002087	2896	g4504150	740.28	1075.01	1.45	1.19	1.72	334.73	2.841	0.060809	740.28	720.18	-1.03	-0.75	-1.63	-20.09	-0.123	0.909358	798.61	739.63	723.65	699.22	852.02	897.89	1269.54	1280.58	419.13	469	1053.84	938.75
200679_x_at	HMGB1: high-mobility group box 1	BE311760	3146	Hs.274472.0	12510.2	13553.6	1.08	0.99	1.18	1043.33	1.534	0.190427	12510.2	11708.8	-1.07	-0.96	-1.2	-801.4	-0.984	0.379876	11754.3	12230.7	12838.9	13217	14496.3	14678.9	12486.7	12552.3	9615.14	11702.3	13002.8	12515.1
200680_x_at	HMGB1: high-mobility group box 1	NM_002128	3146	g4504424	15960.7	16912.6	1.06	0.99	1.13	951.88	1.343	0.251087	15960.7	15729.1	-1.01	-0.97	-1.06	-231.65	-0.535	0.613177	15839.4	15288.3	16163.3	16552	18255.3	17676	16394.3	15324.9	15030.3	15326.5	16016.9	16542.7
200681_at	GLO1: glyoxalase I	NM_006708	2739	g5729841	5320.23	5256.66	-1.01	-0.96	-1.06	-63.57	-0.401	0.706405	5320.23	6751.03	1.27	1.15	1.39	1430.81	3.841	0.018864	5710.52	5273.56	5247.15	5049.67	5080.9	5179.96	5372.07	5393.69	7677.57	6879.64	6232.98	6213.94
200682_s_at	UBE2L3: ubiquitin-conjugating enzyme E2L 3	BG531983	7332	Hs.108104.0	6113.88	7011.29	1.15	1.06	1.24	897.41	2.713	0.037247	6113.88	5368.29	-1.14	-0.98	-1.36	-745.59	-1.382	0.240044	6095.25	5559.39	6309.16	6491.71	7576.53	7309.51	6433.41	6725.72	3916.83	5517.19	5901.19	6137.95
200683_s_at	UBE2L3: ubiquitin-conjugating enzyme E2L 3	BE964689	7332	Hs.108104.0	1445.39	1419.79	-1.02	-0.93	-1.13	-25.6	-0.298	0.781946	1445.39	1458.67	1.01	0.97	1.05	13.28	0.431	0.686783	1484.29	1494.29	1376.01	1426.98	1581.47	1523.21	1225.23	1349.24	1484.88	1426.33	1479.05	1444.43
200684_s_at	UBE2L3: ubiquitin-conjugating enzyme E2L 3	AI819709	7332	Hs.108104.0	467.19	409.59	-1.14	-0.92	-1.48	-57.6	-0.98	0.388152	467.19	552.75	1.18	1.09	1.28	85.55	3.441	0.013787	449.82	518.29	462.46	438.2	524.34	486.95	318.2	308.88	601.45	526.29	528.96	554.29
200685_at	SFRS11: splicing factor, arginine/serine-rich 11	AU146237	9295	Hs.11482.0	1221.37	1219.27	-1	-0.8	-1.32	-2.1	-0.012	0.991406	1221.37	1262.33	1.03	0.87	1.2	40.96	0.335	0.754817	1309.12	1285.21	1173.05	1118.09	1526.45	1515.01	863.12	972.5	1328.17	1554.11	1109.36	1057.66
200686_s_at	SFRS11: splicing factor, arginine/serine-rich 11	NM_004768	9295	g4759099	7673.58	7809.11	1.02	0.98	1.06	135.53	0.75	0.504094	7673.58	8020.11	1.05	1	1.09	346.53	1.705	0.181671	7691.44	7650.76	7757.82	7594.3	8146.16	8013.86	7344.4	7732.03	7562.92	7812.77	8285.99	8418.75
200687_s_at	SF3B3: splicing factor 3b, subunit 3, 130kDa	NM_012426	23450	g11034822	2308.58	1992.9	-1.16	-1.1	-1.23	-315.68	-4.536	0.005811	2308.58	2822.83	1.22	1.13	1.32	514.25	3.898	0.022225	2230.24	2269.13	2402.73	2332.24	1988.49	1830.77	2096.67	2055.69	2969.56	2444.62	2953.11	2924.04
200688_at	SF3B3: splicing factor 3b, subunit 3, 130kDa	D13642	23450	g285998	361.87	358.22	-1.01	-0.86	-1.19	-3.65	-0.103	0.921258	361.87	427.24	1.18	0.95	1.44	65.37	1.281	0.259276	334.06	311.14	377.78	424.5	399.1	403.6	309.42	320.75	324.34	384.81	480.42	519.38
200689_x_at	EEF1G /// LOC729998: eukaryotic translation elongation factor 1 gamma /// elongation factor 1 gamma pseudogene	NM_001404	1937 /// 729998	g4503480	11102	11261.7	1.01	0.98	1.05	159.72	0.66	0.549379	11102	11805.4	1.06	1.01	1.12	703.34	2.125	0.07778	11506.6	11312.8	10445.9	11142.7	11313.5	11211.1	11431.2	11091	11691.2	11265.4	11853.1	12411.6
200690_at	HSPA9: heat shock 70kDa protein 9 (mortalin)	AA927701	3313	Hs.3069.0	1131.65	1064.06	-1.06	-1.01	-1.12	-67.59	-1.79	0.162304	1131.65	1071.41	-1.06	-0.94	-1.19	-60.24	-0.78	0.47316	1202.71	1164.65	1127.97	1031.28	1062.47	1075.67	1077.65	1040.45	1235.2	1128.65	980	941.78
200691_s_at	HSPA9: heat shock 70kDa protein 9 (mortalin)	BC000478	3313	g12653414	5899.03	5953.28	1.01	0.97	1.05	54.25	0.395	0.707525	5899.03	5821.06	-1.01	-0.93	-1.11	-77.97	-0.248	0.816995	6219.29	5749.29	5831.14	5796.38	6037.77	6150.39	5835.57	5789.38	6363.55	6297.69	5259.95	5363.04
200692_s_at	HSPA9: heat shock 70kDa protein 9 (mortalin)	NM_004134	3313	g4758569	5051.4	5035.93	-1	-0.96	-1.04	-15.47	-0.127	0.903482	5051.4	4268.97	-1.18	-1.04	-1.36	-782.43	-2.254	0.102977	4920.18	5223.79	5094.31	4967.31	5197.94	5210.71	4931.08	4804.01	3316.35	4900.93	4302.08	4556.54
200693_at	YWHAQ: tyrosine 3-monooxygenase/tryptophan 5-monooxygenase activation protein, theta polypeptide	NM_006826	10971	g5803226	8825.83	9562.49	1.08	1.01	1.16	736.66	1.926	0.131475	8825.83	8740.83	-1.01	-0.98	-1.05	-85	-0.459	0.662627	8660.34	8569.34	9113.76	8959.87	10210.6	10144.9	9097.7	8796.68	8613.9	9088.4	8462.16	8798.85
200694_s_at	DDX24: DEAD (Asp-Glu-Ala-Asp) box polypeptide 24	NM_020414	57062	g13787212	5072.15	4129.41	-1.23	-1.05	-1.48	-942.75	-2.202	0.113429	5072.15	4969.55	-1.02	-0.97	-1.07	-102.61	-0.681	0.538986	5080.29	4958.35	5118.16	5131.81	4945.74	4785.16	3410.63	3376.11	4847.49	4615.69	5222.6	5192.4
200695_at	PPP2R1A: protein phosphatase 2 (formerly 2A), regulatory subunit A , alpha isoform	NM_014225	5518	g7657474	504.48	489.46	-1.03	-0.8	-1.46	-15.02	-0.171	0.874616	504.48	663.29	1.31	1.03	1.6	158.81	1.809	0.165848	485.65	488.84	518.28	525.16	691.92	577.42	351.75	336.77	826.3	416.41	693.42	717.04
200696_s_at	GSN: gelsolin (amyloidosis, Finnish type)	NM_000177	2934	g4504164	208.23	303.56	1.46	1.2	1.73	95.34	2.913	0.053171	208.23	292.34	1.4	1.25	1.57	84.12	4.561	0.008347	219.02	184.35	211.19	218.34	373.97	339.04	261.48	239.78	336.3	263.76	299.07	270.24
200697_at	HK1: hexokinase 1	NM_000188	3098	g4504390	807.53	1114.6	1.38	1.13	1.64	307.07	2.505	0.083192	807.53	767.76	-1.05	-1	-1.11	-39.77	-1.618	0.159608	775.44	793.61	863.85	797.21	1349.65	1297.12	907.33	904.29	772	794.19	780.32	724.53
200698_at	KDELR2: KDEL (Lys-Asp-Glu-Leu) endoplasmic reticulum protein retention receptor 2	AL542253	11014	Hs.118778.0	915.73	1454.08	1.59	0.99	2.35	538.35	1.611	0.184036	915.73	547.98	-1.67	-1.1	-2.85	-367.75	-2.053	0.086094	760.13	661.72	1183.33	1057.75	911.59	921.22	2029.93	1953.6	252.19	404.59	775.41	759.73
200699_at	KDELR2: KDEL (Lys-Asp-Glu-Leu) endoplasmic reticulum protein retention receptor 2	BE962456	11014	Hs.118778.0	709.71	1055.36	1.49	1.11	2.06	345.65	2.27	0.063639	709.71	545.54	-1.3	-0.85	-2.14	-164.17	-1.021	0.347204	531.05	515.53	905.21	887.06	854.66	885.91	1266.43	1214.45	308.96	372.5	724.19	776.51
200700_s_at	KDELR2: KDEL (Lys-Asp-Glu-Leu) endoplasmic reticulum protein retention receptor 2	NM_006854	11014	g8051609	1045.13	1329.37	1.27	0.94	1.63	284.24	1.325	0.263285	1045.13	700.26	-1.49	-1.14	-2.1	-344.88	-2.546	0.055673	1021.19	873.31	1144.13	1141.9	984.57	967.3	1721.15	1644.47	411.52	597.81	911.22	880.49
200701_at	NPC2: Niemann-Pick disease, type C2	NM_006432	10577	g5453677	2171.83	3290.28	1.51	1.45	1.59	1118.45	14.526	1.1e-05	2171.83	2211.91	1.02	0.83	1.21	40.08	0.163	0.880139	2263.25	2229.89	2055.36	2138.82	3377.33	3406.38	3149.57	3227.83	1537.34	2200	2616.42	2493.87
200702_s_at	DDX24: DEAD (Asp-Glu-Ala-Asp) box polypeptide 24	BG421209	57062	Hs.155986.0	2837.62	2422.67	-1.17	-0.94	-1.55	-414.95	-1.126	0.330719	2837.62	2697.8	-1.05	-0.91	-1.23	-139.83	-0.568	0.598416	2675.25	2633.94	3025.24	3016.06	3068.65	2994.06	1884.86	1743.13	2146.67	2533.19	3003.64	3107.69
200703_at	DYNLL1: dynein, light chain, LC8-type 1	NM_003746	8655	g4505812	10602.2	11546.3	1.09	1.07	1.11	944.1	7.857	0.000549	10602.2	10620.5	1	0.92	1.09	18.31	0.034	0.974971	10597.2	10316.2	10778.1	10717.1	11650.8	11444.5	11430.8	11659	9302.07	10220	11431	11528.8
200704_at	LITAF: lipopolysaccharide-induced TNF factor	AB034747	9516	g12862475	56.94	53.55	-1.06	-0.79	-1.38	-3.4	-0.361	0.73289	56.94	37.82	-1.51	-1.12	-1.95	-19.13	-2.196	0.094089	67.62	73.67	45.96	40.53	42.68	66	52.33	53.19	32.68	38.53	46.72	33.34
200705_s_at	EEF1B2 /// hCG_1983058: eukaryotic translation elongation factor 1 beta 2 /// hCG1983058	NM_001959	1933 /// 644820	g4503476	12906.5	12102.5	-1.07	-1.02	-1.12	-804	-2.293	0.063412	12906.5	13669.4	1.06	1.03	1.09	762.91	3.026	0.032376	13506.3	12435.3	12829.8	12854.6	11811.3	11495.7	12431.8	12671.3	13338.3	13842.7	13647.1	13849.6
200706_s_at	LITAF: lipopolysaccharide-induced TNF factor	NM_004862	9516	g4758913	43.57	48.28	1.11	0.9	1.43	4.71	0.764	0.486762	43.57	36.07	-1.21	-0.85	-1.79	-7.5	-0.878	0.414206	35.72	37.97	40.25	60.32	54.06	42.08	48.24	48.73	25.79	53.37	38.08	27.03
200707_at	PRKCSH: protein kinase C substrate 80K-H	NM_002743	5589	g4506076	208.27	145.54	-1.43	-1.23	-1.68	-62.73	-3.935	0.007677	208.27	310.23	1.49	0.67	2.33	101.96	0.978	0.398567	235.91	213.04	201.69	182.46	129.58	123.64	157.28	171.66	616.23	157.15	239.39	228.14
200708_at	GOT2: glutamic-oxaloacetic transaminase 2, mitochondrial (aspartate aminotransferase 2)	NM_002080	2806	g4504068	2998.59	3111.83	1.04	0.98	1.1	113.24	1.068	0.345806	2998.59	3309.89	1.1	1.05	1.16	311.3	3.09	0.035139	3113.41	2922.05	2979.43	2979.45	2986.04	2907.13	3315.02	3239.1	3518.14	3071.48	3299.03	3350.9
200709_at	FKBP1A: FK506 binding protein 1A, 12kDa	NM_000801	2280	g4503724	2512.94	1382.24	-1.82	-1.36	-2.65	-1130.69	-3.624	0.013181	2512.94	2948.24	1.17	0.8	1.58	435.31	0.742	0.503536	2707.16	1975.06	2742.52	2627.01	1858.71	1784.64	931.94	953.68	4612.87	2217.96	2452.11	2510.04
200710_at	ACADVL: acyl-Coenzyme A dehydrogenase, very long chain	NM_000018	37	g4557234	1082.77	969.03	-1.12	-1.01	-1.24	-113.74	-1.831	0.135703	1082.77	906.15	-1.19	-1.04	-1.39	-176.62	-2.187	0.098683	1104.91	1147.87	1028.91	1049.4	891.21	856.25	1082.11	1046.56	862.01	711.27	1002.95	1048.37
200711_s_at	SKP1: S-phase kinase-associated protein 1	NM_003197	6500	g6006030	3859.73	4141.96	1.07	0.89	1.26	282.23	0.639	0.56698	3859.73	3917.85	1.02	0.88	1.15	58.13	0.181	0.867155	3991.02	3871.94	3739.08	3836.87	4869.32	4932.65	3392.55	3373.31	3326.81	3415.03	4443.4	4486.18
200712_s_at	MAPRE1: microtubule-associated protein, RP/EB family, member 1	AI633566	22919	Hs.234279.0	1315.51	1284.19	-1.02	-0.95	-1.11	-31.32	-0.528	0.626847	1315.51	1038.33	-1.27	-1.07	-1.56	-277.17	-2.343	0.095695	1261.03	1349.09	1304.97	1346.94	1263.95	1147.38	1415.69	1309.75	692.13	1115.1	1191.35	1154.75
200713_s_at	MAPRE1: microtubule-associated protein, RP/EB family, member 1	NM_012325	22919	g6912493	4674.07	3944.36	-1.19	-0.92	-1.67	-729.71	-1.045	0.37136	4674.07	4627.84	-1.01	-0.84	-1.27	-46.23	-0.079	0.941733	4832.02	4742.07	4561.8	4560.38	5292.18	4990.47	2835.07	2659.71	3714	3540.36	5549.61	5707.38
200714_x_at	OS9: amplified in osteosarcoma	NM_006812	10956	g5803108	1137.55	1484.36	1.3	1.16	1.46	346.81	3.496	0.025477	1137.55	1371.48	1.21	1.06	1.36	233.93	2.34	0.080396	1201.22	1201.97	1081.7	1065.32	1634.81	1637.85	1400.08	1264.71	1370.8	1114.43	1455.34	1545.34
200715_x_at	RPL13A: ribosomal protein L13a	BC000514	23521	g12653484	10088.4	8871.73	-1.14	-0.92	-1.46	-1216.67	-0.958	0.385626	10088.4	11954.7	1.18	1.08	1.32	1866.27	2.99	0.047185	11179.6	11031.4	8807.35	9335.23	6879.83	6986.67	10884.6	10735.8	11502.5	11840.1	12178.8	12297.3
200716_x_at	RPL13A: ribosomal protein L13a	NM_012423	23521	g6912633	15233	15727.8	1.03	1.01	1.06	494.75	2.028	0.089096	15233	16086.3	1.06	1.01	1.1	853.24	1.994	0.113542	15581.5	15349.3	14739	15262.3	15458.5	15419.5	16017.1	16016	15224.4	15654.1	16892.5	16574
200717_x_at	RPL7: ribosomal protein L7	NM_000971	6129	g4506658	18450.7	18826.5	1.02	0.97	1.08	375.89	0.616	0.577444	18450.7	19316.4	1.05	0.99	1.11	865.71	1.43	0.242223	19180.7	16679.4	18844.8	19097.7	18784.2	18899	19135.1	18487.9	19033.1	19268.7	19388.6	19575.1
200718_s_at	SKP1: S-phase kinase-associated protein 1	AA927664	6500	Hs.171626.0	12938.8	13847.7	1.07	0.97	1.17	908.87	1.152	0.327664	12938.8	12281.4	-1.05	-1	-1.11	-657.4	-1.752	0.153299	13210.5	13173.8	12625.8	12745.1	15409.8	14949.4	12561.9	12469.5	11634	11763.7	12691.8	13036
200719_at	SKP1: S-phase kinase-associated protein 1	BE964043	6500	Hs.171626.0	740.41	818.99	1.11	0.96	1.27	78.58	1.176	0.291372	740.41	853.73	1.15	0.94	1.38	113.33	1.174	0.306345	673.9	695.02	834.39	758.33	921.17	911.14	729.43	714.21	748.79	655.64	1000.74	1009.77
200720_s_at	ACTR1A: ARP1 actin-related protein 1 homolog A, centractin alpha (yeast)	AL532341	10121	Hs.153961.0	496.77	639.99	1.29	1.12	1.5	143.22	3.08	0.026559	496.77	385.03	-1.29	-1.1	-1.5	-111.74	-2.553	0.057132	401.52	464.15	560.87	560.55	652.71	705.76	594.87	606.61	330.66	383.88	422.24	403.35
200721_s_at	ACTR1A: ARP1 actin-related protein 1 homolog A, centractin alpha (yeast)	NM_005736	10121	g13325058	638.18	975.77	1.53	1.32	1.81	337.59	5.181	0.005791	638.18	839.31	1.32	1.03	1.67	201.13	1.808	0.129696	530.87	543.6	765.07	713.17	1030.24	1013.62	922.28	936.94	1112.79	812.38	729.44	702.62
200722_s_at	CAPRIN1: cell cycle associated protein 1	BG258784	4076	Hs.278672.0	684.59	503.79	-1.36	-1.24	-1.49	-180.79	-5.75	0.00128	684.59	440.5	-1.55	-1.27	-1.99	-244.09	-3.957	0.018947	632.66	671.1	709.25	725.33	550.87	532.92	485.07	446.31	268.86	525.51	477.21	490.4
200723_s_at	CAPRIN1: cell cycle associated protein 1	NM_005898	4076	g5174502	6197.72	4741.36	-1.31	-1.26	-1.36	-1456.36	-11.383	5.9e-05	6197.72	4861.59	-1.27	-1.11	-1.5	-1336.13	-3.021	0.049075	5982.1	6053.24	6371.7	6383.85	4830.44	4878.3	4705.56	4551.17	3574.9	5229.17	5287.83	5354.48
200725_x_at	RPL10: ribosomal protein L10	NM_006013	6134	g5174430	13961.6	14207.6	1.02	0.98	1.05	245.98	0.851	0.431418	13961.6	14570.2	1.04	1.01	1.08	608.61	2.11	0.084904	14254.3	14168.5	13519.2	13904.3	14568.1	14664.2	13755.2	13842.7	14202.5	14120.7	14990.4	14967.1
200726_at	PPP1CC: protein phosphatase 1, catalytic subunit, gamma isoform	NM_002710	5501	g4506006	8243.79	7636.41	-1.08	-0.92	-1.3	-607.38	-0.762	0.499831	8243.79	6561.68	-1.26	-1.21	-1.31	-1682.11	-9.975	0.000105	8319.83	8466.41	8003.5	8185.42	6175.06	6361.95	9022.54	8986.08	6165.41	6701.32	6777.49	6602.5
200727_s_at	ACTR2: ARP2 actin-related protein 2 homolog (yeast)	AA699583	10097	Hs.42915.0	960.38	1072.39	1.12	1.01	1.23	112.01	1.791	0.126125	960.38	905.37	-1.06	-0.92	-1.23	-55.02	-0.694	0.520368	1024.33	949.23	1013.1	854.87	1212.92	988.94	1059.55	1028.16	734.23	1040.23	991.23	855.76
200728_at	ACTR2: ARP2 actin-related protein 2 homolog (yeast)	BE566290	10097	Hs.42915.0	8040.22	8175.19	1.02	0.95	1.08	134.98	0.437	0.678879	8040.22	7562.78	-1.06	-0.98	-1.15	-477.44	-1.301	0.253352	8130.29	7567.42	8430.89	8032.28	8311.7	8747.93	8104.72	7536.43	6606.5	7789.41	7925.34	7929.87
200729_s_at	ACTR2: ARP2 actin-related protein 2 homolog (yeast)	NM_005722	10097	g5031570	5424.33	5310.63	-1.02	-1	-1.04	-113.7	-1.599	0.172009	5424.33	4567.46	-1.19	-1	-1.46	-856.87	-1.633	0.198612	5272.38	5476.72	5557.75	5390.46	5400.3	5288.46	5226.51	5327.26	3036.49	5304.09	5135.62	4793.62
200730_s_at	PTP4A1: protein tyrosine phosphatase type IVA, member 1	BF576710	7803	Hs.227777.0	623.8	510.89	-1.22	-1	-1.44	-112.91	-1.667	0.189853	623.8	438.94	-1.42	-1.02	-2.13	-184.85	-1.734	0.135735	538.24	481.31	745.31	730.33	489.37	535.55	520.76	497.88	222.48	401.11	534.99	597.2
200731_s_at	PTP4A1: protein tyrosine phosphatase type IVA, member 1	AW165960	7803	Hs.227777.0	695.89	565.37	-1.23	-1.16	-1.31	-130.52	-5.742	0.001232	695.89	551.67	-1.26	-0.94	-1.93	-144.22	-1.234	0.302239	677.34	703.5	736.22	666.49	529.72	548.23	578.55	604.98	310.22	397.68	768.88	729.91
200732_s_at	PTP4A1: protein tyrosine phosphatase type IVA, member 1	AL578310	7803	Hs.227777.0	2523.82	1708	-1.48	-1.29	-1.72	-815.81	-5.447	0.008663	2523.82	2295.04	-1.1	-0.84	-1.58	-228.77	-0.539	0.626623	2497.33	2444.84	2624.66	2528.44	1394.18	1533.32	1995.25	1909.26	1531.32	1611.53	3168.68	2868.64
200733_s_at	PTP4A1: protein tyrosine phosphatase type IVA, member 1	U48296	7803	g1777754	2845.22	2657.12	-1.07	-0.88	-1.28	-188.1	-0.604	0.572627	2845.22	2772.85	-1.03	-0.84	-1.25	-72.37	-0.211	0.840306	3069.6	2059.67	3233.61	3018.02	2355.57	2400.95	2884.11	2987.84	2400.28	2394.27	3183.53	3113.31
200734_s_at	ARF3: ADP-ribosylation factor 3	BG341906	377	Hs.119177.0	2141.32	2336.74	1.09	0.97	1.21	195.42	1.25	0.284756	2141.32	1828.29	-1.17	-1.11	-1.23	-313.03	-4.898	0.003152	2219.92	2236.21	2051.17	2057.99	2085.61	2082.13	2530.01	2649.2	1923.86	1861.02	1776.71	1751.57
200735_x_at	NACA: nascent polypeptide-associated complex alpha subunit	NM_005594	4666	g5031930	15724	16332.9	1.04	1.02	1.06	608.94	3.942	0.007626	15724	16346.2	1.04	1.01	1.07	622.25	2.111	0.102842	15587.1	15610.2	15642.5	16056	16575	16447.9	16121.6	16187	15537.4	16588.9	16730.1	16528.4
200736_s_at	GPX1: glutathione peroxidase 1	NM_000581	2876	g10834975	4514.86	4860.43	1.08	1.01	1.15	345.58	1.885	0.126669	4514.86	3947.05	-1.14	-1.05	-1.25	-567.8	-2.771	0.049507	4350.42	4453.23	4525.27	4730.5	5022.26	5246.73	4590.74	4582.01	3534.43	3820.51	3999.02	4434.25
200737_at	PGK1: phosphoglycerate kinase 1	NM_000291	5230	g4505762	4413.82	3396.15	-1.3	-1.18	-1.44	-1017.68	-4.558	0.004425	4413.82	3543.12	-1.25	-1.11	-1.41	-870.71	-3.28	0.022264	4646.75	4583.24	4391.95	4033.36	3530.11	2889.19	3695.53	3469.76	2864.65	3814.77	3732.38	3760.66
200738_s_at	PGK1: phosphoglycerate kinase 1	NM_000291	5230	g4505762	12105.4	11283.5	-1.07	-1.05	-1.1	-821.95	-5.149	0.002754	12105.4	11633.6	-1.04	-1.02	-1.06	-471.77	-3.656	0.010713	12382.1	12057.1	12016.8	11965.5	10930.5	11301.6	11354.8	11546.9	11678.1	11379.6	11688.1	11788.7
200739_s_at	SUMO3: SMT3 suppressor of mif two 3 homolog 3 (S. cerevisiae)	BG338532	6612	Hs.85119.0	630.11	593.67	-1.06	-0.96	-1.17	-36.44	-0.99	0.372352	630.11	447.43	-1.41	-1.11	-1.87	-182.68	-2.499	0.061096	568.74	580.76	670.01	700.92	568.04	564.71	605.75	636.19	354.02	315.91	558.59	561.18
200740_s_at	SUMO3: SMT3 suppressor of mif two 3 homolog 3 (S. cerevisiae)	NM_006936	6612	g5902095	4714.03	3601.52	-1.31	-1.03	-1.62	-1112.51	-1.857	0.131793	4714.03	4014.03	-1.17	-0.82	-1.81	-700	-0.725	0.499525	3677.89	3883.96	5650.22	5644.03	3944.82	4138.24	3238.29	3084.72	2633.96	2622.59	5333.59	5465.96
200741_s_at	RPS27: ribosomal protein S27 (metallopanstimulin 1)	NM_001030	6232	g4506710	17182.9	17140.2	-1	-0.97	-1.04	-42.72	-0.126	0.904382	17182.9	17105	-1	-0.97	-1.04	-77.86	-0.232	0.825553	17356.6	17583.1	17012.4	16779.3	17571	17699.4	16671.5	16618.7	16342.1	17034.8	17651.3	17391.9
200742_s_at	TPP1: tripeptidyl peptidase I	BG231932	1200	Hs.20478.0	118.05	105.58	-1.12	-0.86	-1.61	-12.47	-0.633	0.571375	118.05	125.56	1.06	0.75	1.38	7.51	0.333	0.760876	118.04	120.08	119.42	114.67	77.34	80.69	162.24	102.06	82.89	90.54	167.1	161.72
200743_s_at	TPP1: tripeptidyl peptidase I	NM_000391	1200	g5597012	555.81	616.98	1.11	0.87	1.36	61.17	0.743	0.507438	555.81	647.63	1.17	0.89	1.44	91.82	1.002	0.385815	597.69	562.55	514.94	548.04	452.41	505.83	739.97	769.71	475.13	509.11	799.89	806.4
200744_s_at	GNB1: guanine nucleotide binding protein (G protein), beta polypeptide 1	AI741124	2782	Hs.215595.0	1218.83	1160.77	-1.05	-0.66	-2.4	-58.06	-0.144	0.894098	1218.83	959.27	-1.27	-1.06	-1.55	-259.56	-2.132	0.07762	1037.2	1129.94	1378.48	1329.7	457.15	496.41	1795	1894.51	703.92	960.49	1115.51	1057.17
200745_s_at	GNB1: guanine nucleotide binding protein (G protein), beta polypeptide 1	AF070603	2782	Hs.215595.0	2648.23	2339.4	-1.13	-0.82	-1.58	-308.82	-0.644	0.54332	2648.23	2852.84	1.08	0.84	1.41	204.61	0.48	0.648788	2051.43	2103.63	3250.97	3186.88	1639.63	1883.73	3125.11	2709.14	2336.89	2454.86	3185.32	3434.29
200746_s_at	GNB1: guanine nucleotide binding protein (G protein), beta polypeptide 1	NM_002074	2782	g11321584	4004.86	3587.15	-1.12	-0.84	-1.59	-417.72	-0.611	0.572791	4004.86	4531.1	1.13	0.96	1.33	526.23	1.251	0.258249	3561.63	3489.53	4551.84	4416.45	2585.23	2437.02	4779.14	4547.19	4103.78	3877.73	5069.58	5073.3
200747_s_at	NUMA1: nuclear mitotic apparatus protein 1	NM_006185	4926	g5453819	565.59	593.52	1.05	0.94	1.15	27.92	0.777	0.492094	565.59	743.04	1.31	1.25	1.38	177.45	7.827	0.003053	563.53	573.78	572.71	552.34	534.59	531.58	671.39	636.5	739.07	698.44	730.68	803.97
200748_s_at	FTH1: ferritin, heavy polypeptide 1	NM_002032	2495	g4503794	9596.92	13202.4	1.38	1.31	1.44	3605.5	9.316	0.001532	9596.92	11456	1.19	1.11	1.28	1859.07	3.808	0.027633	9882.48	9467.06	9472.47	9565.66	14036.1	13634.2	12574.7	12564.6	10313	11021.9	12184.5	12304.6
200749_at	RAN: RAN, member RAS oncogene family	BF112006	5901	Hs.10842.0	5691.44	5649.22	-1.01	-0.89	-1.15	-42.22	-0.096	0.929279	5691.44	6993.11	1.23	1.13	1.32	1301.67	4.01	0.022067	5838.55	5577.81	5820.72	5528.67	6467.3	6326.32	4870.52	4932.75	7424.18	7627.58	6584.41	6336.27
200750_s_at	RAN: RAN, member RAS oncogene family	AF054183	5901	g4092053	13504.8	15317.2	1.13	1.07	1.2	1812.4	3.69	0.015538	13504.8	13654.7	1.01	0.97	1.05	149.94	0.441	0.674609	13040	13260.5	13562.5	14156.1	16114.6	15912.9	14280.5	14960.7	12970.9	14009	13953.8	13685.1
200751_s_at	HNRNPC: heterogeneous nuclear ribonucleoprotein C (C1/C2)	BE898861	3183	Hs.182447.0	9939.67	9471.08	-1.05	-1	-1.1	-468.59	-1.665	0.15086	9939.67	9059.35	-1.1	-0.97	-1.26	-880.32	-1.198	0.309007	9920.34	9485.2	10066.1	10287	9347.53	9016.73	9429.31	10090.8	6916.24	9729.65	9856.08	9735.41
200752_s_at	CAPN1: calpain 1, (mu/I) large subunit	NM_005186	823	g12408655	166.62	191.93	1.15	1.09	1.22	25.31	3.913	0.008037	166.62	196.38	1.18	0.86	1.5	29.76	0.917	0.4244	154.68	169.94	175.04	166.82	200.35	182.19	200.03	185.15	279.16	123.28	200.42	182.66
200753_x_at	SFRS2: splicing factor, arginine/serine-rich 2	BE866585	6427	Hs.73965.0	4515.6	3958.84	-1.14	-1.1	-1.18	-556.75	-6.52	0.006638	4515.6	3696.99	-1.22	-1.15	-1.3	-818.61	-6.185	0.008184	4511.16	4502.39	4547.41	4501.43	4036.53	4157.06	3857.76	3784.02	3306.2	3853.63	3768.5	3859.63
200754_x_at	SFRS2: splicing factor, arginine/serine-rich 2	NM_003016	6427	g4506898	8750.08	8529.72	-1.03	-0.99	-1.06	-220.35	-1.195	0.287897	8750.08	9207.46	1.05	1.01	1.1	457.39	1.916	0.127565	8772.4	8506.4	8768.91	8952.59	8947.76	8541.05	8455.86	8174.21	9255.26	8573.09	9448.28	9553.24
200755_s_at	CALU: calumenin	BF939365	813	Hs.7753.0	507.22	434.98	-1.17	-1.04	-1.3	-72.24	-2.114	0.100452	507.22	570.44	1.12	0.97	1.3	63.22	1.307	0.240211	507.49	418.66	546.52	556.22	474.97	415.17	428.88	420.91	484.39	533.84	634.52	629.02
200756_x_at	CALU: calumenin	U67280	813	g2809323	173.37	142.54	-1.22	-1.08	-1.4	-30.83	-2.737	0.064455	173.37	129.73	-1.34	-1.05	-1.82	-43.64	-2.058	0.129405	166.04	175.87	176.1	175.47	138.17	113.98	165.05	152.98	72.59	126.41	170.48	149.44
200757_s_at	CALU: calumenin	NM_001219	813	g6005991	1256.93	1020.98	-1.23	-1.17	-1.29	-235.95	-7.026	0.001052	1256.93	1523.64	1.21	1.11	1.32	266.71	3.52	0.024401	1301.89	1246.78	1300.34	1178.72	1008.06	1060.45	981.93	1033.48	1528.73	1370.21	1707.77	1487.82
200758_s_at	NFE2L1: nuclear factor (erythroid-derived 2)-like 1	AI361227	4779	Hs.83469.0	1477.87	1422.35	-1.04	-0.93	-1.18	-55.52	-0.542	0.621179	1477.87	1271.54	-1.16	-0.98	-1.42	-206.33	-1.448	0.238136	1490.25	1537.19	1415.74	1468.29	1256.86	1244.73	1605.79	1582.01	975.5	1112.44	1597.81	1400.41
200759_x_at	NFE2L1: nuclear factor (erythroid-derived 2)-like 1	NM_003204	4779	g4505378	2523.35	2482.94	-1.02	-0.93	-1.11	-40.4	-0.299	0.780734	2523.35	2134.8	-1.18	-1.05	-1.35	-388.54	-2.319	0.090843	2597.36	2607.26	2426.44	2462.32	2267.8	2258.24	2711.93	2693.8	1739.61	2065.36	2512.59	2221.65
200760_s_at	ARL6IP5: ADP-ribosylation-like factor 6 interacting protein 5	N92494	10550	Hs.92384.0	2841.43	2634.58	-1.08	-0.92	-1.29	-206.85	-0.754	0.489699	2841.43	2478.18	-1.15	-0.86	-1.68	-363.25	-0.746	0.503767	2986.02	2495.19	3026.96	2857.55	2359.08	2079.96	3033.79	3065.5	1354.21	2051.23	3349.04	3158.23
200761_s_at	ARL6IP5: ADP-ribosylation-like factor 6 interacting protein 5	NM_006407	10550	g7669496	2929.07	2071.51	-1.41	-0.97	-2.54	-857.55	-1.5	0.221944	2929.07	2482.26	-1.18	-0.86	-1.83	-446.81	-0.819	0.466903	3106.78	2549.39	3087.96	2972.13	1107.68	1107.08	2997.94	3073.35	1463.32	1676.87	3490.26	3298.58
200762_at	DPYSL2: dihydropyrimidinase-like 2	NM_001386	1808	g4503376	2719.29	2776.45	1.02	0.95	1.1	57.16	0.441	0.67603	2719.29	2958.36	1.09	0.92	1.26	239.06	0.874	0.431014	2629.96	2497.04	2993.11	2757.06	2730.04	2999.32	2694.7	2681.75	3395.62	3383.69	2624.52	2429.59
200763_s_at	RPLP1: ribosomal protein, large, P1	NM_001003	6176	g4506668	17780.8	18768.3	1.06	1.02	1.1	987.44	2.345	0.071359	17780.8	18498.1	1.04	1	1.08	717.23	1.593	0.181158	18291.1	17416.1	17546.5	17869.7	19646.6	19086.2	17967.1	18373.1	17527.2	18160.9	18972.7	19331.5
200764_s_at	CTNNA1: catenin (cadherin-associated protein), alpha 1, 102kDa	AI826881	1495	Hs.178452.0	1435.82	1817.4	1.27	1.04	1.5	381.57	1.947	0.131487	1435.82	1312.29	-1.09	-0.93	-1.31	-123.54	-0.904	0.413935	1361.54	1326.58	1466.72	1588.45	2177.8	2102.38	1495.3	1494.1	956.39	1340.68	1503.32	1448.76
200765_x_at	CTNNA1: catenin (cadherin-associated protein), alpha 1, 102kDa	NM_001903	1495	g4503126	1386.22	1877.61	1.35	1.16	1.55	491.39	3.048	0.046877	1386.22	1423.07	1.03	0.95	1.11	36.85	0.576	0.586048	1363.52	1283.53	1474.6	1423.24	2196.59	2086.08	1674.34	1553.45	1323.25	1354.52	1506.51	1508.01
200766_at	CTSD: cathepsin D	NM_001909	1509	g4503142	205.29	241.73	1.18	0.91	1.45	36.44	1.109	0.342962	205.29	235.11	1.15	0.91	1.39	29.82	1.005	0.382701	202.99	191.47	222.85	203.84	191.17	184.07	314.84	276.82	316.08	178.55	221.74	224.06
200767_s_at	FAM120A: family with sequence similarity 120A	NM_014612	23196	g8922113	943.86	1016.29	1.08	0.95	1.22	72.43	1.003	0.355518	943.86	1041.89	1.1	1	1.23	98.03	1.643	0.175307	1049.51	1019.08	893.07	813.78	1108.03	892.74	1064.38	1000.02	1006.42	1031.39	1109.58	1020.17
200768_s_at	MAT2A: methionine adenosyltransferase II, alpha	BC001686	4144	g12804546	7127.18	6556.39	-1.09	-0.97	-1.23	-570.79	-1.212	0.30673	7127.18	7825.5	1.1	1.06	1.14	698.32	4.378	0.006356	6981.72	7000.88	7159.02	7367.09	5705.46	5807.6	7339.42	7373.06	8198.16	7797.39	7580.34	7726.11
200769_s_at	MAT2A: methionine adenosyltransferase II, alpha	NM_005911	4144	g5174528	318.42	239.52	-1.33	-0.95	-2.1	-78.91	-1.384	0.238275	318.42	293.3	-1.09	-0.88	-1.38	-25.12	-0.618	0.562782	321.55	378.99	292.87	280.29	155.59	142.37	317.07	343.03	211.43	378.24	284.9	298.63
200770_s_at	LAMC1: laminin, gamma 1 (formerly LAMB2)	J03202	3915	g186916	54.13	55.12	1.02	0.85	1.24	0.99	0.158	0.880256	54.13	47.71	-1.13	-0.92	-1.38	-6.42	-1.021	0.35365	62.46	62.75	40.56	50.75	58.37	48.32	51.05	62.76	38.9	47.25	49.55	55.12
200772_x_at	PTMA: prothymosin, alpha (gene sequence 28)	BF686442	5757	Hs.250655.0	16917.8	15979.4	-1.06	-0.93	-1.21	-938.47	-0.734	0.49235	16917.8	17834.8	1.05	0.98	1.14	916.99	1.122	0.330608	15334.2	15837.5	18124	18375.7	14051.6	14411.8	17535.9	17918.1	17280.2	18019	18434.2	17606
200773_x_at	LOC643287 /// PTMA: prothymosin, alpha (gene sequence 28) /// similar to prothymosin, alpha (gene sequence 28)	NM_002823	5757 /// 643287	g4506276	15815.6	15388.6	-1.03	-0.97	-1.09	-427.02	-0.793	0.459075	15815.6	16175.1	1.02	0.99	1.06	359.57	0.982	0.382134	15205.1	15266.1	16265.9	16525.2	14713.6	14909.5	16576.1	15355.1	16348.1	15866.2	16028	16458.4
200774_at	FAM120A: family with sequence similarity 120A	BE963765	23196	Hs.76666.0	8004.96	8036.34	1	0.96	1.05	31.38	0.134	0.897868	8004.96	8752.63	1.09	1.05	1.14	747.67	3.666	0.016665	8446.63	8050.45	7948.49	7574.25	7925.98	7660.48	8285.4	8273.5	8773.87	9017.25	8640.27	8579.14
200775_s_at	HNRPK: heterogeneous nuclear ribonucleoprotein K	BC000355	3190	g12653174	8074.42	8130.87	1.01	0.96	1.05	56.45	0.246	0.814798	8074.42	7862.24	-1.03	-0.99	-1.07	-212.18	-1.124	0.304134	8334.81	7744.04	8005.59	8213.25	8621.37	8237.06	7837.64	7827.41	7658.27	7949.4	7628.49	8212.79
200776_s_at	BZW1 /// LOC151579: basic leucine zipper and W2 domains 1 /// similar to basic leucine zipper and W2 domains 1	AL518328	151579 /// 9689	Hs.155291.0	2017.96	1980.05	-1.02	-0.85	-1.27	-37.9	-0.159	0.883239	2017.96	1513.21	-1.33	-1.18	-1.53	-504.74	-4.159	0.021185	2057.81	1961.8	2065.18	1987.03	1582.9	1565.36	2460.43	2311.53	1209.78	1789.52	1524.52	1529.04
200777_s_at	BZW1 /// LOC151579: basic leucine zipper and W2 domains 1 /// similar to basic leucine zipper and W2 domains 1	NM_014670	151579 /// 9689	g7661849	5889.39	5350.92	-1.1	-0.92	-1.37	-538.47	-0.849	0.456947	5889.39	5780.23	-1.02	-0.97	-1.07	-109.15	-0.653	0.547561	5854.28	5860.11	6085.31	5757.84	4321.04	4212.95	6254.82	6614.85	5715.74	6204.47	5719.24	5481.49
200778_s_at	SEPT2: septin 2	AI191427	4735	Hs.155595.0	948.09	1165.83	1.23	1.08	1.41	217.74	2.631	0.039991	948.09	922.37	-1.03	-0.8	-1.4	-25.72	-0.164	0.877131	1061.82	787.63	1035.11	907.78	1284.06	1193.39	1159.69	1026.16	608.91	750.32	1170.16	1160.07
200779_at	ATF4: activating transcription factor 4 (tax-responsive enhancer element B67)	NM_001675	468	g4502264	9406.11	8240.98	-1.14	-0.97	-1.38	-1165.13	-1.34	0.269946	9406.11	10516.1	1.12	1.09	1.15	1109.98	7.547	0.000316	9414.73	9284.64	9208.26	9716.81	6632.07	6899.69	10017	9415.15	10381.3	10348.2	10575.5	10759.4
200780_x_at	GNAS: GNAS complex locus	NM_000516	2778	g8659565	12903.1	14064	1.09	1.01	1.17	1160.85	1.767	0.170247	12903.1	13183.8	1.02	0.98	1.06	280.69	0.834	0.454303	13134	12855.9	12616.9	13005.7	15301	15045.7	13148.9	12760.5	13367.4	12246.5	13477.1	13644.4
200781_s_at	RPS15A: ribosomal protein S15a	NM_001019	6210	g4506688	14061.1	13361	-1.05	-0.97	-1.14	-700.14	-1.056	0.347387	14061.1	14654.5	1.04	1.01	1.08	593.35	2.009	0.121275	14688.8	13406.4	13832.2	14317.2	12270.2	12411.6	14666.4	14095.9	14818.7	14422.2	14795.1	14582
200782_at	ANXA5: annexin A5	NM_001154	308	g4809273	730.69	654.14	-1.12	-0.65	-3.99	-76.54	-0.267	0.806809	730.69	778.67	1.07	0.84	1.3	47.98	0.478	0.66265	678.74	708.77	770.92	764.32	148.01	169.55	1127.49	1171.53	595.11	632.45	996.76	890.36
200783_s_at	STMN1: stathmin 1/oncoprotein 18	NM_005563	3925	g13518023	9706.48	10043.8	1.03	0.96	1.11	337.28	0.758	0.497622	9706.48	9538.9	-1.02	-0.98	-1.05	-167.58	-0.809	0.454629	9930.9	9403.21	9780.96	9710.86	10654.6	10906.9	9415.69	9197.86	9799.38	9771.91	9044.29	9540.04
200786_at	PSMB7: proteasome (prosome, macropain) subunit, beta type, 7	NM_002799	5695	g4506202	7123	7603.15	1.07	1.04	1.1	480.14	4.226	0.010184	7123	6987.54	-1.02	-0.94	-1.11	-135.46	-0.385	0.722415	7084.73	6894.93	7129.15	7383.19	7710.59	7532.45	7494.01	7675.54	6054.55	6943.2	7388.07	7564.36
200787_s_at	PEA15: phosphoprotein enriched in astrocytes 15	BC002426	8682	g12803230	248.55	270.71	1.09	0.75	1.45	22.17	0.423	0.697794	248.55	253.49	1.02	0.76	1.29	4.94	0.123	0.908282	261.05	226.41	227.31	279.43	173.24	193.17	351.19	365.26	345.16	285.89	196.98	185.92
200788_s_at	PEA15: phosphoprotein enriched in astrocytes 15	NM_003768	8682	g4505704	969.2	1044.1	1.08	0.83	1.33	74.89	0.508	0.646211	969.2	996.33	1.03	0.73	1.33	27.12	0.155	0.886757	962.25	973.12	960.24	981.19	781.13	797.22	1289.04	1308.99	1401.98	1174.73	682.39	726.2
200789_at	ECH1: enoyl Coenzyme A hydratase 1, peroxisomal	NM_001398	1891	g4503446	3590.92	3954.38	1.1	1.02	1.19	363.47	2.012	0.099425	3590.92	3786.48	1.05	0.84	1.27	195.57	0.42	0.700346	3824.18	3667.44	3387.59	3484.45	3726.85	3694.27	4340.35	4056.06	2816.04	3210.44	4471.65	4647.81
200790_at	ODC1: ornithine decarboxylase 1	NM_002539	4953	g4505488	6785.32	4974.96	-1.36	-1.2	-1.57	-1810.35	-3.962	0.00758	6785.32	8237.91	1.21	1.02	1.42	1452.6	1.833	0.14036	6279.18	6260.65	7118.33	7483.11	4245.57	4551.77	5570.09	5532.43	7320.9	6677.11	9298.52	9655.13
200791_s_at	IQGAP1: IQ motif containing GTPase activating protein 1	NM_003870	8826	g4506786	1578.66	965.16	-1.64	-1.46	-1.85	-613.5	-8.841	0.002846	1578.66	1715.2	1.09	0.98	1.19	136.54	1.396	0.256385	1589.41	1563.1	1589.42	1572.72	842.27	848.88	1079.98	1089.52	1626.89	1485.24	1912.97	1835.71
200792_at	XRCC6: X-ray repair complementing defective repair in Chinese hamster cells 6 (Ku autoantigen, 70kDa)	NM_001469	2547	g4503840	8874.31	8777.04	-1.01	-0.92	-1.13	-97.26	-0.176	0.871311	8874.31	9062.43	1.02	1.01	1.04	188.12	2.374	0.055401	9018.11	8753.6	8815.01	8910.51	9684.27	9768.55	7922.27	7733.09	9008.13	8959.12	9073.23	9209.23
200793_s_at	ACO2: aconitase 2, mitochondrial	NM_001098	50	g4501866	1140.79	1172.12	1.03	1	1.06	31.32	1.42	0.224301	1140.79	1081.13	-1.06	-0.96	-1.17	-59.66	-0.934	0.408129	1182.25	1116.52	1098.11	1166.28	1199.73	1163.98	1166.79	1157.96	1027.44	935.11	1186.24	1175.75
200794_x_at	DAZAP2: DAZ associated protein 2	NM_014764	9802	g7661885	7182.58	8062.2	1.12	0.94	1.31	879.61	1.111	0.343515	7182.58	6917.8	-1.04	-0.87	-1.29	-264.78	-0.322	0.767824	7017.09	6892.81	7446.73	7373.72	6730.69	6698.28	9551.5	9268.33	5157.94	5916.41	8255.84	8341.03
200797_s_at	MCL1: myeloid cell leukemia sequence 1 (BCL2-related)	AI275690	4170	Hs.86386.0	3270.61	3382.23	1.03	0.91	1.16	111.62	0.444	0.686545	3270.61	3554.96	1.09	1.01	1.17	284.35	1.798	0.163642	3311.43	3227.78	3211.76	3331.47	3858.72	3758.98	3044.38	2866.82	3334.85	3241.9	3841.51	3801.59
200798_x_at	MCL1: myeloid cell leukemia sequence 1 (BCL2-related)	NM_021960	4170	g11386164	898.46	849.5	-1.06	-0.81	-1.51	-48.96	-0.312	0.773737	898.46	764.31	-1.18	-0.96	-1.49	-134.15	-1.329	0.256357	892.1	803.16	979.33	919.26	583.42	586.44	1110.34	1117.81	544.77	674.34	888.05	950.09
200800_s_at	HSPA1A /// HSPA1B: heat shock 70kDa protein 1A /// heat shock 70kDa protein 1B	NM_005345	3303 /// 3304	g5579469	936.55	785.55	-1.19	-1.1	-1.3	-151	-3.47	0.015108	936.55	727.05	-1.29	-1.06	-1.64	-209.5	-2.147	0.109108	896.74	1001.51	892.45	955.51	765.25	713.49	880.46	783	500.93	643.62	873.14	890.52
200801_x_at	ACTB: actin, beta	NM_001101	60	g5016088	16804.5	17043.2	1.01	0.95	1.08	238.71	0.349	0.746024	16804.5	17442.2	1.04	1	1.07	637.72	1.814	0.122514	16304.7	16609.8	17027.5	17276	18536.6	17708.9	16104.6	15822.7	18110.3	16885.4	17669.7	17103.5
200802_at	SARS: seryl-tRNA synthetase	NM_006513	6301	g5730028	2428.98	2252.15	-1.08	-0.93	-1.29	-176.83	-0.795	0.481091	2428.98	2907.93	1.2	1.08	1.32	478.95	2.777	0.061183	2475.12	2381.3	2343.37	2516.13	1877.92	1871.38	2671.81	2587.5	2949.25	2430.8	3044.43	3207.25
200803_s_at	TEGT: testis enhanced gene transcript (BAX inhibitor 1)	AF033095	7009	g2645728	1734.39	1617.89	-1.07	-0.68	-2.48	-116.5	-0.208	0.848361	1734.39	1297.51	-1.34	-1.13	-1.63	-436.88	-3.025	0.052035	1780	1767.88	1724.34	1665.32	656.05	643.94	2616.38	2555.2	936.19	1204.97	1516.22	1532.65
200804_at	TEGT: testis enhanced gene transcript (BAX inhibitor 1)	NM_003217	7009	g4507432	5115.43	4976.78	-1.03	-0.85	-1.28	-138.66	-0.229	0.83058	5115.43	6101.18	1.19	1.1	1.29	985.75	3.807	0.010235	5608.63	5304.71	4806.76	4741.63	4039.72	3949.55	6047.18	5870.67	6381.53	5698.03	6017.89	6307.27
200805_at	LMAN2: lectin, mannose-binding 2	NM_006816	10960	g5803022	1271.06	1537.08	1.21	1.15	1.28	266.02	6.466	0.003182	1271.06	923.09	-1.38	-1.24	-1.53	-347.97	-5.461	0.001998	1171.37	1283.61	1271.72	1357.53	1531.02	1497.28	1565.57	1554.45	796.14	1043.36	942.89	909.95
200806_s_at	HSPD1: heat shock 60kDa protein 1 (chaperonin)	BE256479	3329	Hs.79037.0	9953.75	9779.72	-1.02	-0.97	-1.07	-174.03	-0.59	0.578586	9953.75	9432.54	-1.06	-0.95	-1.18	-521.21	-0.847	0.450786	10344.3	9496.58	9994.24	9979.9	10401	9268.99	9840.86	9608.02	7899.56	9109.23	10403.4	10318
200807_s_at	HSPD1: heat shock 60kDa protein 1 (chaperonin)	NM_002156	3329	g4504520	16941.1	16998.8	1	0.98	1.03	57.73	0.242	0.817412	16941.1	17154.9	1.01	0.98	1.05	213.8	0.591	0.584812	17249.2	16864.8	16551.8	17098.6	17219.6	17137	17190.7	16448	16667.2	16572.9	17419.6	17959.8
200808_s_at	ZYX: zyxin	NM_003461	7791	g4508046	168.47	104.26	-1.62	-1.44	-1.82	-64.21	-7.199	0.000364	168.47	142.02	-1.19	-0.98	-1.49	-26.45	-1.444	0.226287	170.39	170.87	151.31	181.31	98.49	99.44	95.88	123.22	178.17	152.38	95.71	141.82
200809_x_at	RPL12: ribosomal protein L12	NM_000976	6136	g4506596	12787.3	12199.5	-1.05	-0.96	-1.15	-587.87	-0.876	0.419688	12787.3	13216.1	1.03	0.97	1.1	428.77	0.839	0.433887	13512.4	13262.4	11907.8	12466.6	11165.5	11309.1	13336.5	12986.7	12193	13314.1	13790.9	13566.4
200810_s_at	CIRBP: cold inducible RNA binding protein	NM_001280	1153	g4502846	3423.3	3614.72	1.06	0.89	1.23	191.42	0.542	0.622318	3423.3	3948.14	1.15	1.11	1.2	524.85	5.743	0.001772	3447.74	3624.67	3292.18	3328.59	2945.88	3107.78	4075.08	4330.12	4024.89	3800.48	4020.42	3946.78
200811_at	CIRBP: cold inducible RNA binding protein	NM_001280	1153	g4502846	1773.54	1668.33	-1.06	-0.9	-1.3	-105.22	-0.571	0.607551	1773.54	1854.64	1.05	1.02	1.08	81.1	2.455	0.076181	1772.3	1793.96	1782.52	1745.4	1306.77	1398.54	2022.14	1945.86	1799.63	1943.64	1825.78	1849.52
200812_at	CCT7: chaperonin containing TCP1, subunit 7 (eta)	NM_006429	10574	g5453606	7284.78	7202.36	-1.01	-0.97	-1.05	-82.42	-0.483	0.654177	7284.78	7079.04	-1.03	-0.97	-1.09	-205.74	-0.798	0.476327	7482.36	7182.23	7222.03	7252.51	7453.09	7475.8	7041.4	6839.14	6644.22	6668.96	7381.22	7621.78
200813_s_at	PAFAH1B1: platelet-activating factor acetylhydrolase, isoform Ib, alpha subunit 45kDa	BE256969	5048	Hs.77318.0	429.68	406.06	-1.06	-0.99	-1.13	-23.62	-1.482	0.190019	429.68	377.68	-1.14	-0.8	-1.98	-52	-0.53	0.631687	450.06	428.08	396.1	444.5	390.2	394.98	436.05	403.01	174.06	248.28	548.26	540.11
200814_at	PSME1: proteasome (prosome, macropain) activator subunit 1 (PA28 alpha)	NM_006263	5720	g5453989	5491.79	6181.95	1.13	1.02	1.24	690.15	2.073	0.083533	5491.79	5341.93	-1.03	-0.93	-1.13	-149.86	-0.481	0.64817	5715.55	6056.18	5076.25	5119.19	6710.79	6434.21	5766.51	5816.27	4806.25	5258.23	5644.38	5658.87
200815_s_at	PAFAH1B1: platelet-activating factor acetylhydrolase, isoform Ib, alpha subunit 45kDa	L13386	5048	g349825	987.59	1135	1.15	0.85	1.45	147.41	0.828	0.46692	987.59	701.31	-1.41	-1.32	-1.51	-286.28	-8.732	0.000178	962.64	954.95	1043.11	989.67	841.54	816.13	1433.46	1448.88	753.72	736.55	669.61	645.35
200816_s_at	PAFAH1B1: platelet-activating factor acetylhydrolase, isoform Ib, alpha subunit 45kDa	NM_000430	5048	g6031206	1832.26	2052.01	1.12	1.07	1.17	219.75	3.913	0.007905	1832.26	1744.85	-1.05	-0.73	-1.84	-87.42	-0.192	0.859751	1834.76	1732.89	1922.16	1839.25	1980.13	1983.05	2121.71	2123.16	786.01	1155.05	2516.81	2521.52
200817_x_at	RPS10: ribosomal protein S10	NM_001014	6204	g4506678	16030.9	17010.6	1.06	1.03	1.1	979.73	2.901	0.054808	16030.9	16533.4	1.03	1.01	1.06	502.56	2.003	0.122609	16104.1	15981.1	15838	16200.3	17745.9	17317.8	16730.6	16248.2	16120.4	16121.6	16921.5	16970.2
200818_at	ATP5O: ATP synthase, H+ transporting, mitochondrial F1 complex, O subunit (oligomycin sensitivity conferring protein)	NM_001697	539	g4502302	8335.34	8553.49	1.03	1.01	1.05	218.14	2.327	0.06192	8335.34	8807.87	1.06	1.02	1.09	472.53	2.626	0.055685	8320.92	8434.41	8129.98	8456.06	8518.34	8559.82	8431.84	8703.94	8620.78	8481.14	8909.93	9219.64
200819_s_at	RPS15: ribosomal protein S15	NM_001018	6209	g4506686	16040.8	16699	1.04	0.99	1.1	658.14	1.243	0.289381	16040.8	16960	1.06	1.03	1.08	919.13	4.093	0.006414	16149.7	16066.5	15604.2	16342.9	17714.7	17419.7	15910.7	15750.7	17251	16528.2	16908.7	17152
200820_at	PSMD8: proteasome (prosome, macropain) 26S subunit, non-ATPase, 8	NM_002812	5714	g4506232	4633.1	4935.33	1.07	1	1.13	302.23	1.686	0.171245	4633.1	4672.81	1.01	0.98	1.04	39.71	0.482	0.64735	4664.91	4714.16	4452.62	4700.71	5239.05	5170.21	4510.75	4821.32	4517.67	4730.3	4770.37	4672.9
200821_at	LAMP2: lysosomal-associated membrane protein 2	NM_013995	3920	g7669502	2252.1	2444.07	1.09	1.02	1.16	191.97	2.191	0.104438	2252.1	2450.06	1.09	0.95	1.24	197.96	1.007	0.367267	2400.94	2368.89	2204.71	2033.86	2484.76	2402.25	2483.43	2405.82	2180.66	2108.46	2722.77	2788.35
200822_x_at	TPI1: triosephosphate isomerase 1	NM_000365	7167	g4507644	6123.77	6688.09	1.09	1.01	1.18	564.32	1.828	0.139501	6123.77	6165.7	1.01	0.88	1.14	41.94	0.085	0.936995	6008.27	5834.32	6270.41	6382.07	7208.6	7141.77	6141.5	6260.49	5477.56	5214.86	6905.79	7064.6
200823_x_at	RPL29: ribosomal protein L29	NM_000992	6159	g4506628	11438.7	10755.1	-1.06	-0.98	-1.15	-683.55	-1.298	0.263362	11438.7	12287.9	1.07	1.03	1.12	849.19	2.778	0.032446	11941.8	11477.3	10941.1	11394.6	10116.7	9742.94	11698.3	11462.6	11859.9	11939.1	12750.7	12601.9
200824_at	GSTP1: glutathione S-transferase pi	NM_000852	2950	g6552334	6791.2	7580.75	1.12	0.99	1.25	789.55	1.5	0.223056	6791.2	7024.95	1.03	0.94	1.13	233.75	0.585	0.594322	6676.64	6667.83	6697.58	7122.72	8658.05	8259.52	6786.84	6618.57	6181.82	6646.08	7345.12	7926.77
200825_s_at	HYOU1: hypoxia up-regulated 1	NM_006389	10525	g13699861	3626.41	3626.13	-1	-0.83	-1.18	-0.28	-0.001	0.999452	3626.41	2896.03	-1.25	-1.02	-1.53	-730.37	-1.758	0.13624	3859.94	2600.87	3968.98	4075.84	3407.55	3254.26	3935.1	3907.59	2390.09	2635.38	3160.99	3397.67
200826_at	SNRPD2: small nuclear ribonucleoprotein D2 polypeptide 16.5kDa	NM_004597	6633	g7242206	11152.4	12269.8	1.1	1.03	1.17	1117.46	2.497	0.077953	11152.4	11579.4	1.04	1	1.07	427.01	1.756	0.145575	11410.1	10897.7	11049.6	11252	12919	13110.1	11440.7	11609.5	11067.2	11383	11987.5	11879.8
200827_at	PLOD1: procollagen-lysine 1, 2-oxoglutarate 5-dioxygenase 1	NM_000302	5351	g4557836	107.31	109.01	1.02	0.86	1.18	1.7	0.166	0.875112	107.31	90.73	-1.18	-0.91	-1.66	-16.58	-1.018	0.373428	98.12	112.08	117.84	101.19	99.83	87.86	125.33	123.01	73.85	56.14	124.27	108.66
200828_s_at	ZNF207: zinc finger protein 207	BE871379	7756	Hs.62112.0	3606.94	3381.9	-1.07	-1.03	-1.11	-225.04	-2.919	0.040212	3606.94	3025.76	-1.19	-1.07	-1.35	-581.18	-2.75	0.067054	3641.25	3648.59	3509.84	3628.08	3450.6	3523.07	3354.03	3199.9	2625.92	2705.91	3354.74	3416.47
200829_x_at	ZNF207: zinc finger protein 207	NM_003457	7756	g4508016	5058.84	4687.17	-1.08	-1.02	-1.14	-371.67	-2.19	0.07279	5058.84	4409.25	-1.15	-0.99	-1.37	-649.59	-1.49	0.22279	5273.17	5171.69	5012.25	4778.26	4851.74	4966.04	4426.53	4504.36	3694.35	3670.33	5019.14	5253.18
200830_at	PSMD2: proteasome (prosome, macropain) 26S subunit, non-ATPase, 2	NM_002808	5708	g4506226	4424.11	4456.35	1.01	0.98	1.03	32.23	0.46	0.6621	4424.11	3863.07	-1.15	-1.02	-1.31	-561.04	-1.89	0.149246	4506.83	4303.22	4362.89	4523.5	4478.39	4445.33	4558.3	4343.37	3399.75	3317.98	4400.87	4333.67
200831_s_at	SCD: stearoyl-CoA desaturase (delta-9-desaturase)	AA678241	6319	Hs.119597.0	637.89	547.43	-1.17	-0.92	-1.57	-90.45	-1.022	0.367956	637.89	571.72	-1.12	-0.99	-1.27	-66.17	-1.47	0.192622	662.8	560.26	701.74	626.74	437.67	373.72	669.19	709.16	517.79	663.9	578.49	526.69
200832_s_at	SCD: stearoyl-CoA desaturase (delta-9-desaturase)	AB032261	6319	g7415720	6803.44	5068.09	-1.34	-1.16	-1.59	-1735.35	-3.48	0.030857	6803.44	6269.85	-1.09	-1.04	-1.13	-533.59	-3.292	0.025152	7183.23	6867.39	6604.06	6559.07	4109.64	4393.63	5763.09	6006	6433.17	6252.03	6319.45	6074.75
200833_s_at	hCG_1757335 /// RAP1B: RAP1B, member of RAS oncogene family /// hCG1757335	NM_015646	5908 /// 643752	g7661677	6252.22	6006.12	-1.04	-0.98	-1.1	-246.1	-1.151	0.318583	6252.22	6151.57	-1.02	-0.92	-1.13	-100.65	-0.269	0.798448	6713.43	6466.42	5954.8	5874.23	6147.62	6060.71	5999.94	5816.22	6697.39	6691.97	5537.53	5679.4
200834_s_at	RPS21: ribosomal protein S21	NM_001024	6227	g4506698	17348.2	18004.6	1.04	0.99	1.09	656.35	1.244	0.300161	17348.2	17757.6	1.02	1.01	1.04	409.38	2.293	0.090215	17407.5	17358.3	17188.9	17438.1	18978.2	18824.1	17304.2	16911.7	17615.9	17385.8	17847.9	18180.7
200835_s_at	MAP4: microtubule-associated protein 4	AI553791	4134	Hs.239298.0	642.28	533.12	-1.2	-1.05	-1.38	-109.16	-2.182	0.078803	642.28	689.78	1.07	0.91	1.27	47.5	0.701	0.510939	535.18	648.84	739.04	646.07	519.8	460.45	576.54	575.7	563.97	679.9	690.39	824.85
200836_s_at	MAP4: microtubule-associated protein 4	NM_002375	4134	g4505098	148.16	150.47	1.02	0.87	1.16	2.31	0.178	0.867977	148.16	165.22	1.12	1.04	1.19	17.06	2.602	0.040676	148.26	148.91	158.77	136.71	119.81	145.66	158.54	177.87	168.85	155.57	176.8	159.65
200837_at	BCAP31: B-cell receptor-associated protein 31	NM_005745	10134	g10047078	2935.56	3534.5	1.2	1.05	1.39	598.94	2.236	0.070487	2935.56	3202.93	1.09	0.92	1.3	267.36	0.84	0.433182	2583.7	2548.03	3236.95	3373.56	3874.5	3721.1	3357.49	3184.9	2903.42	2731.4	3431.87	3745.01
200838_at	CTSB: cathepsin B	NM_001908	1508	g4503138	344.34	325.5	-1.06	-0.73	-1.83	-18.85	-0.221	0.838036	344.34	388.73	1.13	0.94	1.33	44.39	1.134	0.310736	293.79	351.28	387.99	344.31	442.78	493.75	182.36	183.09	351.2	314.33	463.12	426.29
200839_s_at	CTSB: cathepsin B	NM_001908	1508	g4503138	822	849.7	1.03	0.54	1.53	27.69	0.113	0.917154	822	977.92	1.19	0.98	1.4	155.92	1.522	0.219044	824.82	773.6	820.32	869.27	1291.64	1254.13	439.79	413.22	917.8	721.41	1165.96	1106.53
200840_at	KARS: lysyl-tRNA synthetase	NM_005548	3735	g5031814	12068.2	9496.3	-1.27	-1.07	-1.57	-2571.86	-2.323	0.098267	12068.2	11845.5	-1.02	-0.99	-1.05	-222.62	-1.095	0.328994	12195.6	12499	11922	11656	7613.67	7601.95	11548	11221.5	12064.6	11641.5	11756.4	11919.7
200841_s_at	EPRS: glutamyl-prolyl-tRNA synthetase	AI142677	2058	Hs.55921.0	639.02	527.59	-1.21	-1.05	-1.43	-111.43	-2.287	0.105085	639.02	686.55	1.07	0.87	1.28	47.53	0.587	0.598522	641.5	627.43	643.34	643.83	631.12	589.67	442.34	447.25	481.87	631.68	814.65	818.01
200842_s_at	EPRS: glutamyl-prolyl-tRNA synthetase	AI475965	2058	Hs.55921.0	3707.83	3248.59	-1.14	-1.08	-1.21	-459.24	-3.817	0.016067	3707.83	3782.81	1.02	0.84	1.2	74.98	0.182	0.866767	3796.13	3562.73	3775.14	3697.35	3351.9	3481.48	3177.35	2983.64	3228.58	2945.42	4368.7	4588.54
200843_s_at	EPRS: glutamyl-prolyl-tRNA synthetase	NM_004446	2058	g4758293	2348.24	2078.86	-1.13	-1.05	-1.22	-269.37	-2.634	0.039313	2348.24	2674.17	1.14	0.96	1.32	325.94	1.263	0.285125	2532.99	2362.91	2277	2220.04	2157.4	2203.28	2094.52	1860.26	2270.55	2216.8	3113	3096.36
200844_s_at	PRDX6: peroxiredoxin 6	BE869583	9588	Hs.120.0	3140.67	3617.56	1.15	1.02	1.29	476.89	1.882	0.137416	3140.67	3196.02	1.02	0.9	1.14	55.35	0.244	0.818947	3336.56	3221.56	2952	3052.57	4034.87	4014.35	3308.35	3112.68	2640.57	3103.86	3520.26	3519.39
200845_s_at	PRDX6: peroxiredoxin 6	NM_004905	9588	g4758637	3288.72	3517.78	1.07	1	1.15	229.06	1.599	0.16091	3288.72	2740.96	-1.2	-1.05	-1.4	-547.76	-2.228	0.086914	3517.65	3400.92	3115.49	3120.81	3724.3	3655.08	3380.55	3311.18	3126.83	3128.79	2395.27	2312.94
200846_s_at	PPP1CA: protein phosphatase 1, catalytic subunit, alpha isoform	NM_002708	5499	g4506002	3070.43	2877.74	-1.07	-0.98	-1.17	-192.69	-1.214	0.295014	3070.43	2960.55	-1.04	-0.96	-1.13	-109.88	-0.734	0.504777	2933.98	3132.66	3036.96	3178.11	3241.45	3000.62	2610.49	2658.39	2932.53	2576.12	3171.92	3161.64
200847_s_at	TMEM66: transmembrane protein 66	NM_016127	51669	g7706384	4212.91	5346.6	1.27	1.2	1.35	1133.69	7.398	0.003495	4212.91	4249.08	1.01	0.91	1.11	36.18	0.141	0.892793	4492	4351.19	4207.17	3801.26	5312.63	5431.41	5374.24	5268.11	3766.13	4061.52	4702.35	4466.33
200848_at	AHCYL1: S-adenosylhomocysteine hydrolase-like 1	AA479488	10768	Hs.4113.0	2531.7	2570.2	1.02	0.91	1.12	38.5	0.234	0.827214	2531.7	2330.32	-1.09	-1	-1.19	-201.38	-1.616	0.17634	2455.26	2426.44	2649.62	2595.48	2886.85	2778.94	2245.52	2369.49	2004.15	2424.18	2514.95	2378.01
200849_s_at	AHCYL1: S-adenosylhomocysteine hydrolase-like 1	AI589266	10768	Hs.4113.0	3248.35	3236.52	-1	-0.9	-1.14	-11.83	-0.051	0.962628	3248.35	3273.71	1.01	0.97	1.04	25.37	0.374	0.722007	3292.34	3137.37	3243.24	3320.44	3534.36	3724.23	2841.02	2846.48	3303.56	3115.11	3313.07	3363.1
200850_s_at	AHCYL1: S-adenosylhomocysteine hydrolase-like 1	NM_006621	10768	g5729723	2369.28	2514.65	1.06	0.93	1.2	145.37	0.746	0.508401	2369.28	2340.89	-1.01	-0.97	-1.06	-28.39	-0.434	0.687755	2342.61	2333.06	2433.02	2368.43	2912.67	2780.26	2191.85	2173.8	2178.85	2312.65	2442.15	2429.91
200851_s_at	KIAA0174: KIAA0174	NM_014761	9798	g7661971	1783.85	1908.12	1.07	1.02	1.12	124.27	2.288	0.06364	1783.85	2031.36	1.14	1.07	1.21	247.51	3.216	0.022631	1751.43	1707.73	1902.61	1773.64	1846.46	1853.39	1985.79	1946.85	1903.58	1943.09	2103.59	2175.19
200852_x_at	GNB2: guanine nucleotide binding protein (G protein), beta polypeptide 2	NM_005273	2783	g4885282	1293.04	1276.53	-1.01	-0.88	-1.18	-16.52	-0.147	0.89212	1293.04	1386.3	1.07	0.96	1.19	93.26	1.043	0.366199	1241.02	1295.15	1344.99	1291.01	1133.98	1044.03	1431.31	1496.78	1318.69	1179.77	1576.96	1469.79
200853_at	H2AFZ: H2A histone family, member Z	NM_002106	3015	g4504254	14698.7	15757.7	1.07	1.03	1.12	1058.99	2.549	0.056708	14698.7	14487.2	-1.01	-0.98	-1.05	-211.48	-0.621	0.560456	14961	14146.9	14741.7	14945.3	16486.1	16294	15032.8	15217.9	13697.1	14839.1	14470.6	14942.2
200854_at	NCOR1: nuclear receptor co-repressor 1	AB028970	9611	Hs.144904.0	1994.19	1738.95	-1.15	-1.09	-1.21	-255.24	-4.667	0.00394	1994.19	2029.04	1.02	0.82	1.21	34.85	0.147	0.892367	2089.97	1938.45	1993.13	1955.21	1649.16	1689.7	1839.6	1777.35	1625.04	1619.87	2472.37	2398.88
200855_at	C20orf191 /// NCOR1: nuclear receptor co-repressor 1 /// chromosome 20 open reading frame 191	AW771910	149934 /// 9611	Hs.144904.0	228.49	225.14	-1.01	-0.77	-1.48	-3.36	-0.077	0.943037	228.49	174.31	-1.31	-1.14	-1.52	-54.18	-3.365	0.018253	252.1	218.48	232.74	210.66	305.35	292.08	155.79	147.33	145.84	159.61	204.81	187
200856_x_at	C20orf191 /// NCOR1: nuclear receptor co-repressor 1 /// chromosome 20 open reading frame 191	BF437948	149934 /// 9611	Hs.144904.0	309.68	272.65	-1.14	-0.89	-1.53	-37.03	-0.829	0.452373	309.68	257.81	-1.2	-1.07	-1.33	-51.86	-2.642	0.057556	350.41	316.35	309.68	262.27	322.26	360.8	215.71	191.82	249.18	246.02	256.81	279.24
200857_s_at	NCOR1: nuclear receptor co-repressor 1	NM_006311	9611	g5454137	841.04	809.45	-1.04	-0.96	-1.12	-31.59	-0.804	0.452496	841.04	697.94	-1.21	-0.94	-1.66	-143.09	-1.22	0.302237	764.23	852.08	872.28	875.56	888.32	818.89	773.35	757.23	469.02	552.58	803.28	966.89
200858_s_at	RPS8: ribosomal protein S8	NM_001012	6202	g4506742	18460.6	18353.3	-1.01	-0.98	-1.03	-107.23	-0.429	0.684578	18460.6	18642.3	1.01	0.99	1.03	181.69	0.784	0.472517	18549	17854.7	18736.2	18702.5	18193.7	18204	18775.9	18239.8	18604.9	18519.8	18491.5	18952.9
200859_x_at	FLNA: filamin A, alpha (actin binding protein 280)	NM_001456	2316	g4503744	1080.78	631.21	-1.71	-1.39	-2.17	-449.56	-4.432	0.004464	1080.78	991.28	-1.09	-0.9	-1.35	-89.5	-0.713	0.506387	983.68	944.18	1165.19	1230.05	753.87	757.16	552.57	461.26	991.25	700.8	1087.16	1185.89
200860_s_at	CNOT1: CCR4-NOT transcription complex, subunit 1	BC000779	23019	g12653966	2771.39	2687.53	-1.03	-0.87	-1.26	-83.86	-0.277	0.79824	2771.39	3078	1.11	1.06	1.16	306.61	3.989	0.018657	2967.51	2686.27	2640.96	2790.81	2198.32	2157.45	3207.89	3186.44	3153.21	3051.66	3042.51	3064.6
200861_at	CNOT1: CCR4-NOT transcription complex, subunit 1	NM_016284	23019	g7706213	989.25	780.47	-1.27	-0.97	-1.8	-208.78	-1.417	0.231601	989.25	1251.32	1.26	1.07	1.48	262.07	2.266	0.078629	1139.91	974.72	951.78	890.58	591.6	516.63	1103.86	909.78	1550.24	1167.02	1084.92	1203.11
200862_at	DHCR24: 24-dehydrocholesterol reductase	NM_014762	1718	g13375617	2034.63	1960.65	-1.04	-0.9	-1.21	-73.98	-0.42	0.695019	2034.63	2429.01	1.19	1.09	1.3	394.38	3.338	0.017027	2203.61	2108.62	1919.44	1906.87	1664.54	1702.09	2239.25	2236.73	2582.77	2168.39	2424.93	2539.95
200863_s_at	RAB11A: RAB11A, member RAS oncogene family	AI215102	8766	Hs.75618.0	4479.44	5088.82	1.14	1.11	1.16	609.38	8.056	0.000682	4479.44	4327.77	-1.04	-1	-1.07	-151.67	-1.603	0.184367	4526.63	4392.79	4448.56	4549.77	5197.46	5005.66	5206.44	4945.73	4151.74	4562.85	4254.54	4341.95
200864_s_at	RAB11A: RAB11A, member RAS oncogene family	NM_004663	8766	g4758983	1098.01	1300.79	1.18	1.1	1.28	202.78	3.638	0.012106	1098.01	1280.23	1.17	1.03	1.31	182.23	2.047	0.098741	1178.83	1167.82	1040.24	1005.15	1268.36	1399.7	1246.83	1288.25	1206.15	1110.55	1464.25	1339.99
200866_s_at	PSAP: prosaposin (variant Gaucher disease and variant metachromatic leukodystrophy)	M32221	5660	g337761	2078.22	2239.9	1.08	0.92	1.24	161.68	0.827	0.45441	2078.22	2224.73	1.07	1	1.15	146.5	1.71	0.152169	1914.9	1987.51	2190.6	2219.88	2550.22	2550.4	1980.27	1878.72	2282.7	2308.18	2144.67	2163.34
200867_at	ZNF313: zinc finger protein 313	AL031685	55905	Hs.10590.0	823.7	820.65	-1	-0.9	-1.14	-3.05	-0.052	0.96111	823.7	834.68	1.01	0.94	1.09	10.98	0.286	0.786571	779.38	850.22	862.4	802.79	866.78	953.19	711.99	750.65	832.4	922.33	821.56	762.42
200868_s_at	ZNF313: zinc finger protein 313	NM_018683	55905	g8923897	868.66	919.8	1.06	0.94	1.21	51.14	0.773	0.486383	868.66	702.26	-1.24	-1.06	-1.44	-166.39	-2.193	0.076961	739.66	782.33	971.83	980.81	861.89	934.42	959.54	923.33	595.4	671.9	766.43	775.32
200869_at	LOC390354 /// RPL18A: ribosomal protein L18a /// similar to ribosomal protein L18a; 60S ribosomal protein L18a	NM_000980	390354 /// 6142	g11415025	15240.2	13410.8	-1.14	-1.08	-1.2	-1829.38	-4.008	0.015417	15240.2	15961.3	1.05	0.98	1.11	721.15	1.225	0.294449	15627.8	15223.8	14760.9	15348.3	12822.5	12559.5	14149.3	14111.8	14448.4	15774.6	16787.4	16835
200870_at	STRAP: serine/threonine kinase receptor associated protein	NM_007178	11171	g6005931	5091.1	5686.35	1.12	0.99	1.28	595.25	1.515	0.212628	5091.1	5884.73	1.16	1.03	1.32	793.63	2.113	0.124701	5177.7	4026.26	5767.74	5392.71	5478.76	5523.81	5763.48	5979.33	5916.64	5842.63	5906.93	5872.73
200871_s_at	PSAP: prosaposin (variant Gaucher disease and variant metachromatic leukodystrophy)	NM_002778	5660	g11386146	4381.3	5214.29	1.19	1.04	1.35	832.99	2.077	0.113605	4381.3	5145.78	1.17	1.11	1.24	764.48	5.132	0.003172	4355.27	4041.55	4571.56	4556.81	5865.09	5882.11	4617.38	4492.58	5385.68	5110.88	5002.04	5084.51
200872_at	S100A10: S100 calcium binding protein A10	NM_002966	6281	g4506760	1306	1056.6	-1.24	-1.15	-1.33	-249.4	-5.212	0.008186	1306	1150.92	-1.13	-1.04	-1.25	-155.08	-2.337	0.092839	1286.92	1320.32	1341.49	1275.26	1124.6	1138.59	949.18	1014.01	1004.86	1209.45	1298.35	1091.02
200873_s_at	CCT8: chaperonin containing TCP1, subunit 8 (theta)	NM_006585	10694	g6005726	10631.2	10542.3	-1.01	-0.97	-1.05	-88.94	-0.348	0.740435	10631.2	10652.4	1	0.97	1.04	21.2	0.091	0.930649	11079.2	10149	10528.1	10768.6	10772.7	10864.3	10182.8	10349.4	10434.7	10473.3	10960.4	10741.3
200874_s_at	NOL5A: nucleolar protein 5A (56kDa with KKE/D repeat)	BE796327	10528	Hs.296585.0	1287.61	924.61	-1.39	-1.3	-1.49	-363.01	-8.481	0.000181	1287.61	1177.52	-1.09	-1.04	-1.15	-110.09	-2.748	0.033656	1211.81	1302.05	1296.54	1340.06	887.11	850.33	984.43	976.56	1089.71	1195.51	1210.91	1213.96
200875_s_at	NOL5A: nucleolar protein 5A (56kDa with KKE/D repeat)	NM_006392	10528	g5453793	8901.78	6749.62	-1.32	-1.27	-1.38	-2152.16	-11.154	3.1e-05	8901.78	9034.76	1.01	0.99	1.04	132.97	0.91	0.415133	8868.59	8536.22	9041.71	9160.61	6404.76	6659.82	6922.29	7011.61	8984.01	8955.31	9006.69	9193.02
200876_s_at	PSMB1: proteasome (prosome, macropain) subunit, beta type, 1	NM_002793	5689	g4506192	9627.09	10395.3	1.08	1.03	1.13	768.21	2.658	0.038654	9627.09	9169.68	-1.05	-0.91	-1.25	-457.42	-0.517	0.63802	9265.33	9354.2	9874.83	10014	9971.19	10056.4	10773.4	10780.2	6793.57	8979.48	10431.9	10473.7
200877_at	CCT4: chaperonin containing TCP1, subunit 4 (delta)	NM_006430	10575	g5453604	9045.38	8631.22	-1.05	-0.98	-1.13	-414.16	-1.124	0.342312	9045.38	9237.09	1.02	1.01	1.04	191.71	2.423	0.082123	9047.87	8996.9	9035.57	9101.17	9351.58	9179.04	8009.65	7984.6	9234.17	9090.92	9175.53	9447.74
200878_at	EPAS1: endothelial PAS domain protein 1	AF052094	2034	Hs.8136.0	773.99	1129.16	1.46	1.27	1.72	355.17	4.824	0.009808	773.99	424.51	-1.82	-1.44	-2.34	-349.47	-4.14	0.007741	907.28	879.5	649.01	660.15	1081.33	1090.82	1165.56	1178.91	467.63	535.04	380.36	315.01
200880_at	DNAJA1: DnaJ (Hsp40) homolog, subfamily A, member 1	AL534104	3301	Hs.94.0	6910.26	5699.12	-1.21	-1.05	-1.43	-1211.14	-2.297	0.102021	6910.26	6632.41	-1.04	-0.9	-1.24	-277.85	-0.436	0.691932	6699.26	7018.61	6937.6	6985.57	4733.73	4861.91	6512.14	6688.72	5465.49	5610.46	7827.32	7626.36
200881_s_at	DNAJA1: DnaJ (Hsp40) homolog, subfamily A, member 1	NM_001539	3301	g4504510	8318.8	8511.13	1.02	0.98	1.06	192.32	0.943	0.399481	8318.8	7161.68	-1.16	-1.02	-1.35	-1157.12	-1.877	0.154361	8134.4	8253.25	8462.41	8425.15	8869.84	8739.79	8023.61	8411.27	5573.16	6829.67	8200.3	8043.6
200882_s_at	PSMD4: proteasome (prosome, macropain) 26S subunit, non-ATPase, 4	NM_002810	5710	g5292160	3045.61	3202.38	1.05	1	1.1	156.77	1.715	0.140654	3045.61	2478.29	-1.23	-0.97	-1.66	-567.33	-1.447	0.238024	2861.08	3013.83	3204	3103.54	3120.6	3361.95	3191.43	3135.54	1721.69	1908.36	3089.86	3193.22
200883_at	UQCRC2: ubiquinol-cytochrome c reductase core protein II	NM_003366	7385	g4507842	2908.04	1604.78	-1.81	-1.7	-1.93	-1303.26	-13.604	0.000173	2908.04	2643.22	-1.1	-1.03	-1.18	-264.82	-2.323	0.061044	3036.12	3083.19	2780.7	2732.13	1701.71	1619.05	1556.57	1541.78	2502.16	2801.58	2725.49	2543.65
200884_at	CKB: creatine kinase, brain	NM_001823	1152	g4502850	142.87	199.39	1.4	1.04	1.78	56.51	1.84	0.149246	142.87	160.45	1.12	0.96	1.31	17.58	1.248	0.260906	146.97	117.19	153.37	153.97	246.64	253.68	154.49	142.73	192.69	150.76	155.6	142.75
200885_at	RHOC: ras homolog gene family, member C	NM_005167	389	g4885066	1812.97	1864.52	1.03	0.99	1.07	51.55	1.103	0.325531	1812.97	1562.69	-1.16	-0.95	-1.49	-250.28	-1.19	0.317909	1827.14	1860.9	1758.62	1805.21	1802.51	1795.19	1971.52	1888.85	1123.06	1294.92	1846.6	1986.19
200886_s_at	hCG_2015138 /// PGAM1: phosphoglycerate mutase 1 (brain) /// phosphoglycerate mutase 1 pseudogene	NM_002629	5223 /// 642969	g4505752	9360.71	8593.17	-1.09	-1	-1.2	-767.54	-1.628	0.198217	9360.71	7859.18	-1.19	-0.94	-1.64	-1501.53	-1.155	0.331309	9435.77	9510.9	9203.65	9292.53	7701	7895.28	9210.39	9566.02	5427.21	5807.61	10257.3	9944.56
200887_s_at	STAT1: signal transducer and activator of transcription 1, 91kDa	NM_007315	6772	g6274551	1417.4	1607.24	1.13	1.07	1.2	189.83	3.285	0.027295	1417.4	601.72	-2.36	-1.99	-2.88	-815.68	-11.495	0.000417	1433.21	1426.07	1463.52	1346.81	1542.65	1495.53	1710.46	1680.3	411.65	609.86	703.75	681.62
200888_s_at	RPL23: ribosomal protein L23	NM_000978	9349	g4506604	11293.9	10703.3	-1.06	-1.01	-1.1	-590.6	-2.078	0.09183	11293.9	11062.4	-1.02	-0.97	-1.08	-231.54	-0.646	0.551638	11179.8	11719.2	11014.4	11262.2	10214.8	10411.4	10909.2	11277.7	10139.1	11112.7	11626.7	11370.9
200889_s_at	SSR1: signal sequence receptor, alpha (translocon-associated protein alpha)	AI016620	6745	Hs.250773.0	1297.72	1380.33	1.06	1.03	1.1	82.61	2.824	0.030204	1297.72	876.09	-1.48	-1.26	-1.8	-421.63	-4.451	0.017249	1261.04	1355.96	1279.13	1294.76	1409.05	1355.86	1421.46	1334.93	625.96	846.83	1007.51	1024.06
200890_s_at	SSR1: signal sequence receptor, alpha (translocon-associated protein alpha)	AW006345	6745	Hs.250773.0	835.86	774.62	-1.08	-0.99	-1.17	-61.25	-1.47	0.19876	835.86	529.87	-1.58	-1.31	-1.95	-305.99	-4.471	0.007093	755.13	828.34	924.13	835.86	798.88	705.58	803.83	790.19	361.84	533.38	617.81	606.46
200891_s_at	SSR1: signal sequence receptor, alpha (translocon-associated protein alpha)	NM_003144	6745	g6552340	6035.61	5630.7	-1.07	-0.98	-1.19	-404.9	-1.201	0.310517	6035.61	4785.24	-1.26	-1.04	-1.6	-1250.36	-2.006	0.136621	6222.65	5942.85	5990.56	5986.36	6206.04	6191.33	4951.5	5173.94	3804.11	3629.78	5981.87	5725.21
200892_s_at	SFRS10: splicing factor, arginine/serine-rich 10 (transformer 2 homolog, Drosophila)	BC000451	6434	g12653362	6423.02	6051.94	-1.06	-1.04	-1.08	-371.08	-6.308	0.001296	6423.02	5767.91	-1.11	-1.03	-1.21	-655.11	-2.328	0.100035	6401.79	6426.68	6354.78	6508.83	6139.42	5988.94	5947.2	6132.21	5083.41	6452	5745.64	5790.58
200893_at	SFRS10: splicing factor, arginine/serine-rich 10 (transformer 2 homolog, Drosophila)	NM_004593	6434	g4759097	9406.1	8624.73	-1.09	-1.05	-1.14	-781.38	-3.476	0.014397	9406.1	9285.72	-1.01	-0.95	-1.08	-120.38	-0.324	0.762258	9041.79	9336.91	9641.68	9604.04	8198.37	8659.92	8580.82	9059.81	9808.59	9936.98	8833.27	8564.05
200894_s_at	FKBP4: FK506 binding protein 4, 59kDa	AA894574	2288	Hs.848.0	491.35	337.53	-1.46	-1.32	-1.6	-153.82	-5.825	0.004633	491.35	339	-1.45	-1.25	-1.69	-152.35	-4.323	0.004973	459.29	472.27	469.29	564.57	326.93	366.5	330.23	326.47	285.65	306.33	377.16	386.87
200895_s_at	FKBP4: FK506 binding protein 4, 59kDa	NM_002014	2288	g4503728	2703.37	2157.1	-1.25	-1.18	-1.34	-546.26	-6.139	0.000968	2703.37	2267.64	-1.19	-1.09	-1.31	-435.72	-3.422	0.022941	2766.05	2535.38	2732.77	2779.27	2343.17	2113.42	2155.06	2016.75	2154.99	2029.62	2331.37	2554.58
200896_x_at	HDGF: hepatoma-derived growth factor (high-mobility group protein 1-like)	NM_004494	3068	g4758515	4576.86	4854.32	1.06	1.03	1.09	277.47	3.445	0.01385	4576.86	5761.33	1.26	1.15	1.37	1184.47	3.78	0.028646	4638.68	4399.48	4631.03	4638.24	4973.46	4917.24	4787.1	4739.5	6650.5	5354.7	5698.77	5341.33
200897_s_at	PALLD: palladin, cytoskeletal associated protein	NM_016081	23022	g7706354	1638.42	1770.17	1.08	0.79	1.38	131.75	0.446	0.683484	1638.42	1673.15	1.02	0.92	1.13	34.72	0.323	0.758192	1779.03	1699.68	1589.2	1485.77	1296.49	1245	2279.92	2259.28	1773.95	1863.2	1542.56	1512.86
200898_s_at	MGEA5: meningioma expressed antigen 5 (hyaluronidase)	AK002091	10724	Hs.5734.0	130.98	166.54	1.27	0.91	1.76	35.56	1.205	0.277015	130.98	142.55	1.09	0.84	1.44	11.56	0.536	0.613482	98.02	106.21	174.01	145.69	133.75	118.37	209.64	204.42	111.31	159.27	134.74	164.86
200899_s_at	MGEA5: meningioma expressed antigen 5 (hyaluronidase)	NM_012215	10724	g11024697	657.9	675.61	1.03	0.92	1.15	17.71	0.389	0.714639	657.9	907.56	1.38	1.23	1.56	249.66	4.653	0.003636	598.22	580.46	741.9	711.02	624.79	656.42	708.36	712.89	915.03	999.27	828.63	887.28
200900_s_at	M6PR: mannose-6-phosphate receptor (cation dependent)	AI583537	4074	Hs.75709.0	1201.45	1537.43	1.28	1.17	1.4	335.98	4.556	0.004897	1201.45	1280.99	1.07	0.88	1.26	79.54	0.57	0.602332	1072.96	1253.19	1250.16	1229.49	1482.37	1399.86	1599.13	1668.36	995.7	1122.9	1443.73	1561.64
200901_s_at	M6PR: mannose-6-phosphate receptor (cation dependent)	NM_002355	4074	g10947032	1312.1	1522.79	1.16	1.04	1.29	210.69	2.145	0.097906	1312.1	1556.92	1.19	1.08	1.3	244.83	2.857	0.041115	1380.35	1346.28	1317.8	1203.96	1425.57	1316.38	1681.77	1667.43	1438.12	1412.83	1711.91	1664.83
200902_at	SEP15: 15 kDa selenoprotein	NM_004261	9403	g4759095	6867.08	6138.49	-1.12	-1.05	-1.2	-728.59	-2.853	0.052724	6867.08	5677.61	-1.21	-1.09	-1.36	-1189.48	-3.159	0.045503	6737.2	7087.18	6824.39	6819.56	5541.79	6142.64	6133.57	6735.97	5873.37	6564.89	5467.28	4804.89
200903_s_at	AHCY: S-adenosylhomocysteine hydrolase	NM_000687	191	g9951914	3102.06	2993.27	-1.04	-0.92	-1.18	-108.78	-0.487	0.656958	3102.06	2880.06	-1.08	-0.95	-1.24	-222	-0.953	0.405481	3193.39	2987.09	3058.08	3169.67	2566.02	2672.75	3423.1	3311.23	2300.04	2751.51	3137.51	3331.18
200904_at	HLA-E: major histocompatibility complex, class I, E	X56841	3133	Hs.181392.0	644.45	610.49	-1.06	-0.85	-1.3	-33.96	-0.427	0.684812	644.45	433.46	-1.49	-1.2	-1.84	-210.98	-2.939	0.032149	813.67	652.87	562.99	548.26	536.25	510.72	716.79	678.19	337.5	520.77	424	451.58
200905_x_at	HLA-E: major histocompatibility complex, class I, E	NM_005516	3133	g5031744	1234.7	1236.22	1	0.78	1.24	1.53	0.009	0.993372	1234.7	929.68	-1.33	-1.2	-1.46	-305.02	-4.373	0.017707	1427.24	1223.47	1115.46	1172.61	1001.96	923.79	1529.77	1489.37	918.3	902.57	921.5	976.34
200906_s_at	PALLD: palladin, cytoskeletal associated protein	AK025843	23022	Hs.194431.0	844.28	902.11	1.07	0.78	1.36	57.83	0.39	0.721683	844.28	834.39	-1.01	-0.9	-1.15	-9.89	-0.163	0.878446	884.24	878.46	816.76	797.66	651.08	644.94	1164.54	1147.88	948.05	914.05	750.8	724.67
200907_s_at	PALLD: palladin, cytoskeletal associated protein	AU157932	23022	Hs.194431.0	822.5	861.59	1.05	0.75	1.36	39.09	0.261	0.808891	822.5	729.72	-1.13	-0.98	-1.3	-92.78	-1.438	0.20319	897.25	885.18	743.69	763.88	633.06	590.95	1107.98	1114.38	630.71	867.3	684.47	736.38
200908_s_at	RPLP2: ribosomal protein, large, P2	BC005354	6181	Hs.119500.0	44.62	41.87	-1.07	-0.85	-1.31	-2.75	-0.488	0.645938	44.62	71.43	1.6	0.6	2.7	26.81	0.982	0.394842	47.01	51.83	48.95	30.69	36.82	38.95	41.02	50.68	151.15	33.42	52.8	48.34
200909_s_at	RPLP2: ribosomal protein, large, P2	NM_001004	6181	g4506670	17079	17892.1	1.05	1.02	1.08	813.08	2.664	0.038616	17079	17868.7	1.05	1	1.09	789.69	1.633	0.175804	17231.8	17238.7	16501.7	17344	18145.7	18417.4	17398.5	17606.8	16880.6	17363.8	18674.9	18555.6
200910_at	CCT3: chaperonin containing TCP1, subunit 3 (gamma)	NM_005998	7203	g5174726	8919.92	7471.2	-1.19	-1.17	-1.22	-1448.72	-12.398	2e-05	8919.92	9375.06	1.05	1.02	1.09	455.14	2.504	0.057415	8936.6	8665.99	9058.41	9018.67	7316.11	7378.64	7536.33	7653.71	9419.6	8970.41	9364.93	9745.28
200911_s_at	TACC1: transforming, acidic coiled-coil containing protein 1	NM_006283	6867	g5454099	4027.14	2197.01	-1.83	-1.7	-1.97	-1830.13	-13.906	1.5e-05	4027.14	3708.89	-1.09	-1.02	-1.16	-318.25	-2.039	0.088067	4303.49	4064.33	3822.72	3918.01	2271.73	2385.71	2081.44	2049.15	3920.05	3896	3477.89	3541.61
200912_s_at	EIF4A2: eukaryotic translation initiation factor 4A, isoform 2	NM_001967	1974	g9945313	7411.43	7086.75	-1.05	-0.98	-1.12	-324.68	-1.129	0.302409	7411.43	8976.89	1.21	1.16	1.27	1565.47	7.815	0.002437	7962.64	7164.61	7131.82	7386.65	6591.1	6949.43	7607.91	7198.57	8901.51	8960.24	8905.15	9140.67
200913_at	PPM1G: protein phosphatase 1G (formerly 2C), magnesium-dependent, gamma isoform	NM_002707	5496	g4505998	2417.23	1884.48	-1.28	-1.17	-1.42	-532.74	-4.865	0.015682	2417.23	2127.56	-1.14	-1.07	-1.22	-289.67	-3.384	0.040502	2417.36	2383.23	2434.32	2433.99	1728.73	1665.87	2068.46	2074.87	1897.34	2122.3	2193.06	2297.54
200914_x_at	KTN1: kinectin 1 (kinesin receptor)	BF589024	3895	Hs.211577.0	3285.37	2621.8	-1.25	-1.1	-1.44	-663.57	-3.024	0.033045	3285.37	3282.08	-1	-0.94	-1.07	-3.29	-0.026	0.980438	3332.12	3023.77	3519.27	3266.31	3028.6	2866.18	2210.08	2382.34	3468.38	3254.28	3311.34	3094.33
200915_x_at	KTN1: kinectin 1 (kinesin receptor)	NM_004986	3895	g4826813	4409.88	3244.58	-1.36	-1.13	-1.71	-1165.31	-2.807	0.053195	4409.88	3982.52	-1.11	-1.05	-1.17	-427.36	-3.052	0.044199	4648.2	4520.5	4441.65	4029.19	3922.15	3928.15	2556.6	2571.41	4045.99	3901.67	4060.45	3921.99
200916_at	TAGLN2: transgelin 2	NM_003564	8407	g4507356	2799.15	2836.15	1.01	0.88	1.18	37	0.15	0.886996	2799.15	2983.07	1.07	0.93	1.24	183.92	0.753	0.488746	3280.53	3048.29	2406.01	2461.77	3105.26	2941.43	2730.57	2567.33	3263.31	3050.91	2738.27	2879.78
200917_s_at	SRPR: signal recognition particle receptor ('docking protein')	BG474541	6734	Hs.75730.0	236.63	204.76	-1.16	-0.92	-1.52	-31.87	-1.014	0.366977	236.63	232.75	-1.02	-0.81	-1.35	-3.88	-0.108	0.919285	266.33	205.9	241.03	233.26	165.15	146.03	262.46	245.41	277.1	303.36	178.66	171.87
200918_s_at	SRPR: signal recognition particle receptor ('docking protein')	NM_003139	6734	g4507222	3807.92	2639.81	-1.44	-1	-2.55	-1168.11	-1.641	0.190307	3807.92	2985.38	-1.28	-1.05	-1.59	-822.55	-2.14	0.095412	4190.9	3919.52	3435.82	3685.45	1452.12	1429	3913.36	3764.78	3656.18	3518.92	2403.71	2362.69
200919_at	PHC2: polyhomeotic homolog 2 (Drosophila)	NM_004427	1912	g4758241	1313.11	1475.43	1.12	0.92	1.35	162.32	0.969	0.385328	1313.11	1409.62	1.07	0.84	1.33	96.51	0.499	0.644951	1215.54	1201.21	1499.19	1336.5	1718.63	1755.47	1264.91	1162.73	1077.69	1125.81	1641.46	1793.54
200920_s_at	BTG1: B-cell translocation gene 1, anti-proliferative	AL535380	694	Hs.77054.0	503.7	553.93	1.1	0.8	1.41	50.22	0.539	0.622944	503.7	287.89	-1.75	-1.45	-2.16	-215.81	-5.418	0.001925	503.69	434.46	547.11	529.55	768.18	635.2	386.24	426.09	210.5	349.26	326	265.8
200921_s_at	BTG1: B-cell translocation gene 1, anti-proliferative	NM_001731	694	g4502472	1217.41	1200.3	-1.01	-0.86	-1.23	-17.1	-0.13	0.902771	1217.41	799.61	-1.52	-1.38	-1.68	-417.79	-6.633	0.001147	1315.49	1134.56	1303.77	1115.8	1346.8	1443.06	1100.08	911.27	821.32	881.66	767.17	728.29
200922_at	KDELR1: KDEL (Lys-Asp-Glu-Leu) endoplasmic reticulum protein retention receptor 1	NM_006801	10945	g5803047	167.73	129.19	-1.3	-0.93	-2.14	-38.54	-1.244	0.300367	167.73	177.99	1.06	0.89	1.23	10.26	0.602	0.587026	160.24	164.83	173.59	172.26	94.67	61.06	168.25	192.8	188.43	128.97	189.83	204.72
200923_at	LGALS3BP: lectin, galactoside-binding, soluble, 3 binding protein	NM_005567	3959	g6006016	800.09	1008.2	1.26	1.03	1.63	208.12	1.879	0.150136	800.09	808.49	1.01	0.78	1.35	8.41	0.064	0.951058	939.09	483.79	831.42	946.05	1061.28	1011.92	1003.03	956.57	706.37	664.47	903.49	959.65
200924_s_at	SLC3A2: solute carrier family 3 (activators of dibasic and neutral amino acid transport), member 2	NM_002394	6520	g4505140	1479.6	1494.45	1.01	0.85	1.24	14.85	0.088	0.935498	1479.6	2084.18	1.41	1.15	1.77	604.58	2.811	0.032306	1638.52	991.25	1543.96	1744.66	1548.41	1448.24	1517.48	1463.67	1877.77	1841.09	2224.27	2393.57
200925_at	COX6A1: cytochrome c oxidase subunit VIa polypeptide 1	NM_004373	1337	g10047079	9501.66	10720.3	1.13	1.05	1.21	1218.61	2.712	0.064296	9501.66	9962.34	1.05	1.03	1.07	460.68	3.933	0.017754	9404.04	9583.64	9258.52	9760.45	11416.6	11531.8	9987.35	9945.28	9907.31	10011	9873.57	10057.4
200926_at	RPS23: ribosomal protein S23	NM_001025	6228	g4506700	20731.9	21244	1.02	1	1.05	512.12	1.466	0.214892	20731.9	21397.5	1.03	1.01	1.06	665.6	1.997	0.112832	20628.2	20411.2	21067.1	20821.1	21874.8	21602.6	21077.2	20421.4	20554.2	21560.3	21482.8	21992.8
200927_s_at	RAB14: RAB14, member RAS oncogene family	AA919115	51552	Hs.5807.0	1774.87	1849.17	1.04	0.79	1.3	74.3	0.269	0.804859	1774.87	1865.78	1.05	0.82	1.29	90.91	0.356	0.744277	1748.31	1684.97	1866.53	1799.68	2342.23	2303.7	1365.31	1385.46	1457.79	1407.3	2375.46	2222.57
200928_s_at	RAB14: RAB14, member RAS oncogene family	AL162081	51552	g7328165	72.5	54.25	-1.34	-0.99	-2.05	-18.24	-1.556	0.208085	72.5	81.02	1.12	0.95	1.29	8.53	1.152	0.314308	69.43	70.1	80.73	69.72	64.76	81.27	38.12	32.86	60.86	87.81	91.2	84.22
200929_at	TMED10: transmembrane emp24-like trafficking protein 10 (yeast)	NM_006827	10972	g5803200	2906.02	2812.33	-1.03	-0.86	-1.3	-93.69	-0.266	0.807234	2906.02	2458.36	-1.18	-1.13	-1.24	-447.66	-5.934	0.001307	2928.85	3022.33	2861.98	2810.91	2173.93	2239.99	3406.95	3428.45	2296.47	2442.89	2523.76	2570.31
200930_s_at	VCL: vinculin	AA156675	7414	Hs.75350.0	9.18	8.81	-1.04	-0.69	-1.65	-0.37	-0.162	0.876709	9.18	9.16	-1	-0.73	-1.34	-0.02	-0.011	0.991456	8.26	8.05	7.12	13.28	8.47	8.11	13.65	5.02	7.04	8.79	9.31	11.51
200931_s_at	VCL: vinculin	NM_014000	7414	g7669549	233.21	221.76	-1.05	-0.79	-1.54	-11.46	-0.264	0.807473	233.21	120.49	-1.94	-1.72	-2.19	-112.73	-9.465	0.000122	261.47	222.4	227.72	221.27	138.55	159.21	300.91	288.36	111.49	141.21	110.43	118.81
200932_s_at	DCTN2: dynactin 2 (p50)	NM_006400	10540	g13259506	2694.99	2587.63	-1.04	-0.98	-1.1	-107.36	-1.179	0.299231	2694.99	2459.98	-1.1	-1.02	-1.18	-235.01	-2.21	0.092583	2769.18	2716.52	2711.57	2582.69	2404.76	2520.8	2636.21	2788.73	2743.12	2431.54	2373.96	2291.3
200933_x_at	RPS4X: ribosomal protein S4, X-linked	NM_001007	6191	g4506724	16188	16593.9	1.03	1	1.05	405.88	1.665	0.183335	16188	16966.3	1.05	1.02	1.07	778.26	3.093	0.045585	16052.3	16343.8	16137.4	16218.6	16511	17269.4	16416	16179.2	16740.2	16450.1	17092	17582.9
200934_at	DEK: DEK oncogene (DNA binding)	NM_003472	7913	g4503248	5672.91	5582.29	-1.02	-0.83	-1.24	-90.63	-0.133	0.898324	5672.91	5691.57	1	0.79	1.25	18.66	0.023	0.982109	4978	4796.74	6597.33	6319.58	6364.17	6533.7	4747.01	4684.26	6876.62	6752.35	4563.72	4573.58
200935_at	CALR: calreticulin	NM_004343	811	g5921996	178.66	79.3	-2.25	-1.96	-2.62	-99.37	-10.546	4.9e-05	178.66	164.25	-1.09	-0.62	-4.18	-14.42	-0.194	0.858121	197.21	166.15	168.89	182.41	69.9	71.29	79.29	96.7	385.6	81.62	95.66	94.1
200936_at	RPL8: ribosomal protein L8	NM_000973	6132	g4506662	12767.5	13484.7	1.06	1.04	1.07	717.18	6.581	0.001727	12767.5	13604.5	1.07	1.02	1.11	836.99	2.61	0.075646	12774.2	12756	12645.5	12894.2	13519.3	13607.6	13202.6	13609.1	12964.8	13162.9	14229.1	14061.1
200937_s_at	RPL5: ribosomal protein L5	NM_000969	6125	g4506654	17002.6	16629.8	-1.02	-0.97	-1.07	-372.79	-0.758	0.501553	17002.6	17283.2	1.02	0.99	1.05	280.68	0.872	0.442355	17008.5	16885.2	17188.2	16928.3	15793.3	15857	17077.6	17791.2	16597.7	18120.2	17265.5	17149.5
200940_s_at	RERE: arginine-glutamic acid dipeptide (RE) repeats	AB036737	473	g8096339	326.03	462.19	1.42	1.32	1.52	136.16	8.24	0.000308	326.03	425.35	1.3	1.11	1.51	99.32	2.546	0.075089	336.91	346.95	312.01	308.25	440.63	436.88	483.99	487.25	337.54	389.76	469.68	504.42
200941_at	HSBP1: heat shock factor binding protein 1	AK026575	3281	Hs.250899.0	1736.37	1326.88	-1.31	-1.2	-1.42	-409.49	-4.479	0.020139	1736.37	2521.55	1.45	1.25	1.68	785.18	3.844	0.015373	1611.03	1550.47	1913.06	1870.94	1318.57	1349.58	1316.63	1322.76	2931.98	2723.34	2167.33	2263.57
200942_s_at	HSBP1: heat shock factor binding protein 1	NM_001537	3281	g4557646	3445.04	4775.31	1.39	1.18	1.63	1330.27	3.214	0.023277	3445.04	3287.23	-1.05	-0.9	-1.22	-157.81	-0.501	0.634094	3598.89	2791.52	3634.37	3755.39	4219.72	4123.77	5303.81	5453.92	2733.48	3831.79	3334.36	3249.27
200943_at	HMGN1: high-mobility group nucleosome binding domain 1	NM_004965	3150	g4826757	8571.76	8736.28	1.02	0.96	1.08	164.53	0.532	0.622325	8571.76	8298.26	-1.03	-0.92	-1.17	-273.5	-0.452	0.671891	8300.12	7908.8	8957.39	9120.71	8966.5	8934.77	8497.47	8546.4	7060.53	7755.52	9095.82	9281.16
200944_s_at	HMGN1: high-mobility group nucleosome binding domain 1	NM_004965	3150	g4826757	10680.8	10857.6	1.02	0.99	1.04	176.8	1.031	0.359591	10680.8	10213.8	-1.05	-0.95	-1.16	-466.99	-0.773	0.489463	10440.2	10477.5	11125.8	10679.8	10970.6	10748.1	10732	10979.7	8869.94	9604.66	11154.2	11226.4
200945_s_at	SEC31A: SEC31 homolog A (S. cerevisiae)	NM_014933	22872	g7662369	1928.45	1821.39	-1.06	-0.97	-1.16	-107.06	-1.103	0.33052	1928.45	2258.13	1.17	1.04	1.3	329.68	2.234	0.099922	1927.16	1888.15	2038.08	1860.41	1921.04	2007.13	1748.44	1608.95	2664.84	2237.94	2099.91	2029.84
200946_x_at	GLUD1: glutamate dehydrogenase 1	AI339331	2746	Hs.77508.0	1488.71	830.13	-1.79	-1.5	-2.21	-658.58	-6.683	0.004546	1488.71	1461.08	-1.02	-0.92	-1.14	-27.63	-0.294	0.785767	1534.66	1495.4	1506.18	1418.59	697.58	660.91	1074.37	887.65	1193.77	1529.3	1522.93	1598.31
200947_s_at	GLUD1: glutamate dehydrogenase 1	NM_005271	2746	g4885280	2974.6	1551.26	-1.92	-1.54	-2.55	-1423.34	-6.043	0.008151	2974.6	3197.2	1.07	0.98	1.17	222.6	1.25	0.294693	3054.98	2997.78	2931.23	2914.43	1165.77	1129.05	1949.24	1960.98	3719.98	3054.04	3038.73	2976.06
200948_at	MLF2: myeloid leukemia factor 2	NM_005439	8079	g4885486	1547.94	1683.43	1.09	0.98	1.19	135.5	1.395	0.237139	1547.94	1749.06	1.13	0.98	1.28	201.12	1.446	0.233243	1477.78	1527.92	1646.23	1539.82	1730.52	1918.65	1561.24	1523.32	2078.81	1452.18	1831.65	1633.61
200949_x_at	RPS20: ribosomal protein S20	NM_001023	6224	g4506696	14941.9	16824.6	1.13	1.07	1.19	1882.72	3.801	0.009332	14941.9	16045	1.07	1.03	1.12	1103.1	2.697	0.037897	14411.9	14354.7	15536.8	15464	17630.9	17169.7	16608.8	15888.9	15488	15768.7	16358	16565.2
200950_at	ARPC1A: actin related protein 2/3 complex, subunit 1A, 41kDa	NM_006409	10552	g5454077	1511.56	1471.11	-1.03	-0.87	-1.25	-40.46	-0.247	0.81866	1511.56	1965.51	1.3	1.14	1.46	453.95	3.18	0.038757	1607.88	1562.3	1432.07	1444	1766.77	1719.91	1177.82	1219.93	1594.44	1946.68	2222.92	2098.02
200953_s_at	CCND2: cyclin D2	NM_001759	894	g4502616	63.06	38.34	-1.64	-1.12	-2.67	-24.72	-2.152	0.075178	63.06	63.14	1	0.7	1.39	0.08	0.006	0.995153	75.05	71.93	64.55	40.71	61.36	40.67	26.61	24.73	45.7	44.87	79.06	82.94
200954_at	ATP6V0C: ATPase, H+ transporting, lysosomal 16kDa, V0 subunit c	NM_001694	527	g4502312	1363.68	1674.79	1.23	1.17	1.29	311.11	7.127	0.000555	1363.68	1643.4	1.21	1.12	1.29	279.72	3.992	0.016839	1318.28	1376.82	1328.31	1431.31	1710.5	1570.81	1694.93	1722.92	1831.1	1534.69	1622.64	1585.16
200955_at	IMMT: inner membrane protein, mitochondrial (mitofilin)	NM_006839	10989	g5803114	3254.63	2911.5	-1.12	-0.86	-1.6	-343.14	-0.64	0.566473	3254.63	3606.95	1.11	1.04	1.18	352.31	2.632	0.05199	3206.49	3196.45	3436.26	3179.35	3845.3	3821.69	2017.55	1961.46	3889.92	3702.27	3488.27	3347.33
200956_s_at	SSRP1: structure specific recognition protein 1	BE795648	6749	Hs.79162.0	4242.49	3457.78	-1.23	-1.15	-1.31	-784.7	-4.869	0.004768	4242.49	4418.79	1.04	0.96	1.13	176.3	0.85	0.428155	4384.73	3850.65	4259.04	4475.52	3635.1	3558.67	3357.24	3280.13	4854.1	4386.44	4128.65	4305.97
200957_s_at	SSRP1: structure specific recognition protein 1	NM_003146	6749	g4507240	4436.56	3390.1	-1.31	-1.26	-1.36	-1046.46	-11.528	6.7e-05	4436.56	4812.88	1.08	0.99	1.18	376.32	1.456	0.227526	4518.18	4603.48	4353.45	4271.11	3479.42	3443	3386.76	3251.21	5528.25	4748.19	4437	4538.06
200958_s_at	SDCBP: syndecan binding protein (syntenin)	NM_005625	6386	g5032082	4494.16	4676.1	1.04	0.92	1.17	181.95	0.54	0.620553	4494.16	3930.12	-1.14	-0.95	-1.44	-564.04	-1.143	0.329685	4602.93	4720.08	4400.97	4252.66	4098.5	4147.29	5172.74	5285.88	4777.96	4748.35	3190.5	3003.65
200959_at	FUS: fusion (involved in t(12;16) in malignant liposarcoma)	NM_004960	2521	g4826733	5827	5834.38	1	0.97	1.03	7.38	0.065	0.950592	5827	5704.99	-1.02	-0.95	-1.1	-122.01	-0.477	0.661928	5688.73	5852.86	5758.38	6008.03	5640.82	5760.45	5868.95	6067.3	5114.31	5509.27	5971.85	6224.54
200960_x_at	CLTA: clathrin, light chain (Lca)	NM_007096	1211	g6005992	4055.32	4906.3	1.21	1.17	1.25	850.98	8.87	0.000221	4055.32	4470.37	1.1	0.93	1.27	415.05	1.003	0.38747	4140.22	4127.11	3903.63	4050.34	5048.29	5008.58	4698.71	4869.62	3634.81	3923.19	5342.9	4980.58
200961_at	SEPHS2: selenophosphate synthetase 2	NM_012248	22928	g7657612	3049.91	3155.49	1.03	0.84	1.34	105.58	0.249	0.81857	3049.91	3110.92	1.02	0.83	1.32	61.01	0.146	0.893334	3678.25	1828.46	3459.21	3233.72	3218.37	3277.94	3196.99	2928.67	3027.24	3199.19	3057.99	3159.26
200962_at	RPL31: ribosomal protein L31	AI348010	6160	Hs.184014.0	165.69	140.63	-1.18	-0.73	-2.82	-25.06	-0.492	0.653405	165.69	319.68	1.93	1.64	2.27	153.99	6.2	0.00219	191.48	179.34	146.85	145.09	52.8	56.96	219.89	232.88	272.26	297.31	337.45	371.7
200963_x_at	RPL31: ribosomal protein L31	NM_000993	6160	g4506632	18971.7	18596.9	-1.02	-0.97	-1.07	-374.81	-0.705	0.513937	18971.7	19859.6	1.05	1.02	1.07	887.84	2.89	0.034679	19163	19372.7	18198.1	19153.1	17607.3	18013.6	19319.2	19447.5	19529.7	19647.1	20096	20165.5
200964_at	UBA1: ubiquitin-like modifier activating enzyme 1	NM_003334	7317	g4507762	2817.17	2452.48	-1.15	-1.07	-1.24	-364.69	-3.325	0.026242	2817.17	2984.36	1.06	0.9	1.22	167.19	0.607	0.584216	2706.59	2795.71	2831.46	2934.91	2545.24	2687.18	2276.69	2300.8	3446.95	2199.36	3134.32	3156.8
200965_s_at	ABLIM1: actin binding LIM protein 1	NM_006720	3983	g5921987	1894.38	1283.33	-1.48	-1.07	-2.32	-611.05	-2.082	0.115116	1894.38	1373.14	-1.38	-1.07	-1.91	-521.24	-2.143	0.102544	2098.06	1962.08	1781.28	1736.09	1773.43	1767.37	816.59	775.91	1766.62	1770.02	952.88	1003.03
200966_x_at	ALDOA: aldolase A, fructose-bisphosphate	NM_000034	226	g4557304	9132.22	8354.93	-1.09	-1.07	-1.12	-777.29	-7.039	0.000532	9132.22	9276.6	1.02	0.95	1.08	144.38	0.408	0.708574	9106.8	9001.86	9097.58	9322.64	8520.63	8114.36	8431.56	8353.19	9313.59	8284.91	9708.1	9799.81
200967_at	PPIB: peptidylprolyl isomerase B (cyclophilin B)	NM_000942	5479	g4758949	7509.5	7748.1	1.03	0.93	1.14	238.61	0.52	0.624386	7509.5	5878.37	-1.28	-1.11	-1.49	-1631.12	-2.97	0.034859	7629.12	6807.95	7555.64	8045.27	7079.83	7100.38	8371.18	8441.02	4864.7	5232.95	6668.3	6747.53
200968_s_at	PPIB: peptidylprolyl isomerase B (cyclophilin B)	NM_000942	5479	g4758949	5152.5	5422.45	1.05	0.92	1.19	269.95	0.628	0.56402	5152.5	3640.34	-1.42	-1.16	-1.79	-1512.16	-3.127	0.038268	4981.85	4939.05	5048.43	5640.68	4708.93	4769.24	5999.08	6212.55	2539.8	3251.44	4311.38	4458.75
200969_at	SERP1: stress-associated endoplasmic reticulum protein 1	BG107676	27230	Hs.76698.0	2193.64	2245.73	1.02	0.89	1.2	52.09	0.26	0.805032	2193.64	2881.06	1.31	1.14	1.53	687.42	3.246	0.019832	2016.24	1825.1	2595.43	2337.78	2369.96	2465.53	2010.74	2136.69	3085.77	3087.11	2775.42	2575.93
200970_s_at	SERP1: stress-associated endoplasmic reticulum protein 1	AL136807	27230	g12053124	3464.88	3498.48	1.01	0.97	1.05	33.6	0.366	0.727491	3464.88	3488.83	1.01	0.95	1.06	23.95	0.211	0.842016	3376.06	3389.82	3619.42	3474.23	3484.45	3612.33	3599.11	3298.03	3679.33	3636.29	3356.34	3283.36
200971_s_at	SERP1: stress-associated endoplasmic reticulum protein 1	NM_014445	27230	g7657551	4795.98	5079.1	1.06	1.03	1.09	283.12	3.217	0.02825	4795.98	3991.67	-1.2	-1.12	-1.29	-804.32	-4.546	0.008351	4997.27	4621.47	4742.84	4822.36	5059.66	4989.53	5088.35	5178.87	3603.75	3867.81	4201.04	4294.06
200972_at	TSPAN3: tetraspanin 3	BC000704	10099	g12653830	3851.83	4616.13	1.2	1.08	1.31	764.3	2.844	0.062999	3851.83	4057.67	1.05	0.71	1.4	205.85	0.255	0.815386	3803.26	3950.57	3811.78	3841.72	4909.44	5188.71	4004.57	4361.8	2557.56	2766.22	5529.74	5377.18
200973_s_at	TSPAN3: tetraspanin 3	NM_005724	10099	g5032200	805.77	1123.28	1.39	1.1	1.7	317.51	2.177	0.111886	805.77	805.6	-1	-0.64	-2.24	-0.17	-0.001	0.999531	769.01	870.49	756.46	827.13	1412.34	1327.29	878.92	874.59	234.7	450.14	1288.65	1248.91
200974_at	ACTA2: actin, alpha 2, smooth muscle, aorta	NM_001613	59	g4501882	79.57	66.03	-1.21	-0.9	-1.74	-13.54	-1.013	0.362708	79.57	81.35	1.02	0.84	1.24	1.78	0.191	0.854827	77.48	96.78	68.44	75.58	55.16	44.02	99.19	65.75	63.19	91.7	93.46	77.06
200975_at	PPT1: palmitoyl-protein thioesterase 1 (ceroid-lipofuscinosis, neuronal 1, infantile)	NM_000310	5538	g4506030	4404.03	2913.33	-1.51	-1	-3.06	-1490.7	-1.648	0.19453	4404.03	5051.71	1.15	1.08	1.21	647.68	4.027	0.007326	4155.97	4229.94	4634.29	4595.92	1271.15	1456.03	4397.31	4528.85	5287.21	4787.35	5027.55	5104.71
200976_s_at	TAX1BP1: Tax1 (human T-cell leukemia virus type I) binding protein 1	NM_006024	8887	g5803188	1395.36	1324.47	-1.05	-0.84	-1.42	-70.89	-0.343	0.75374	1395.36	1444.95	1.04	0.97	1.1	49.6	0.883	0.423181	1403.62	1379.51	1458.17	1340.13	1002.34	940.94	1731.26	1623.34	1347.52	1585.89	1412.52	1433.88
200977_s_at	TAX1BP1: Tax1 (human T-cell leukemia virus type I) binding protein 1	AF090891	8887	g6690159	1587.38	1492.47	-1.06	-0.83	-1.49	-94.91	-0.364	0.739078	1587.38	1678.12	1.06	0.99	1.13	90.74	1.445	0.204318	1618.14	1481.66	1641.55	1608.18	1052.21	1038.66	1926.68	1952.34	1613.89	1820.36	1686.24	1592
200978_at	MDH1: malate dehydrogenase 1, NAD (soluble)	NM_005917	4190	g5174538	6121.14	6202	1.01	0.9	1.13	80.86	0.193	0.859133	6121.14	5794.87	-1.06	-0.98	-1.14	-326.27	-1.264	0.293295	6192.42	6127.37	6048.95	6115.82	6926.16	6924.04	5438.49	5519.3	5034.87	5977.94	6157.45	6009.24
200979_at	MAP3K15: CDNA FLJ34891 fis, clone NT2NE2017562 /// Mitogen-activated protein kinase kinase kinase 15	BF739979	389840	Hs.1023.0	393.24	404.75	1.03	0.95	1.11	11.51	0.631	0.551473	393.24	457.36	1.16	1.01	1.32	64.12	1.74	0.160133	418.15	411.99	377.67	365.16	381.7	384.29	419.55	433.47	397.71	398.15	525.88	507.69
200980_s_at	PDHA1: pyruvate dehydrogenase (lipoamide) alpha 1	NM_000284	5160	g4505684	1921.43	2036.64	1.06	0.97	1.15	115.21	1.133	0.329341	1921.43	1799.03	-1.07	-0.91	-1.3	-122.41	-0.63	0.571893	1927.94	1846.18	1931.65	1979.96	2283.28	2103.35	1896.54	1863.39	1324.44	1649.68	2142.08	2079.9
200981_x_at	GNAS: GNAS complex locus	NM_016592	2778	g7706588	12375.9	13467.5	1.09	1	1.18	1091.65	1.659	0.185598	12375.9	12588.7	1.02	0.97	1.07	212.79	0.578	0.592165	12767.4	12194.5	12051.5	12490.1	14542.3	14594.8	12510.9	12222.2	12670.6	11630	12948.5	13105.5
200982_s_at	ANXA6: annexin A6	NM_001155	309	g4809274	2433.46	2286.37	-1.06	-1.03	-1.11	-147.09	-2.775	0.039398	2433.46	2245.16	-1.08	-0.93	-1.29	-188.3	-0.866	0.448186	2388.62	2427.75	2404.63	2512.83	2190.72	2240.38	2397.46	2316.9	2049.82	1735.31	2523.74	2671.78
200983_x_at	CD59: CD59 molecule, complement regulatory protein	BF983379	966	Hs.119663.0	781.39	1218.72	1.56	1.51	1.61	437.34	21.498	1.5e-05	781.39	788.8	1.01	0.66	1.36	7.42	0.045	0.96704	767.49	767.94	785.32	804.8	1168.9	1213.72	1243.14	1249.14	363.48	691.9	1067.78	1032.05
200984_s_at	CD59: CD59 molecule, complement regulatory protein	X16447	966	Hs.119663.0	727.57	1111.7	1.53	1.45	1.61	384.13	15.09	1.3e-05	727.57	850.89	1.17	0.82	1.53	123.32	0.788	0.486416	738.47	679.34	714.14	778.33	1127.27	1086.36	1087.93	1145.23	471.61	730.31	1048.78	1152.86
200985_s_at	CD59: CD59 molecule, complement regulatory protein	NM_000611	966	g10835164	1236.52	1834.58	1.48	1.42	1.55	598.06	14.236	5.7e-05	1236.52	1654.58	1.34	1.02	1.66	418.06	1.736	0.179741	1249.54	1178.36	1250.51	1267.66	1727.3	1860.99	1897.21	1852.84	1212.79	1268.51	2115.1	2021.92
200987_x_at	PSME3: proteasome (prosome, macropain) activator subunit 3 (PA28 gamma; Ki)	AA758755	10197	Hs.152978.0	1114.38	786.35	-1.42	-1.03	-2.19	-328.03	-1.85	0.140556	1114.38	955.74	-1.17	-1.03	-1.31	-158.64	-2.084	0.089536	995.16	1037.14	1279.68	1145.54	517.24	482.97	1054.34	1090.85	1033.72	1021.95	873.07	894.21
200988_s_at	PSME3: proteasome (prosome, macropain) activator subunit 3 (PA28 gamma; Ki)	NM_005789	10197	g5031996	440.72	223.01	-1.98	-1.26	-4.45	-217.71	-2.792	0.058356	440.72	578.16	1.31	1.03	1.6	137.45	1.856	0.147209	418.13	396.91	488.48	459.35	88.77	96.85	346.6	359.81	790.87	495.24	503.69	522.85
200989_at	HIF1A: hypoxia-inducible factor 1, alpha subunit (basic helix-loop-helix transcription factor)	NM_001530	3091	g4504384	4113.31	4206.61	1.02	0.82	1.23	93.3	0.183	0.865911	4113.31	4288.92	1.04	0.99	1.1	175.61	1.225	0.266351	4060.97	3968.06	4410.84	4013.38	5188.99	4946.75	3265.13	3425.56	4160.37	4078.35	4512.04	4404.91
200990_at	TRIM28: tripartite motif-containing 28	NM_005762	10155	g5032178	981.83	728.36	-1.35	-1.19	-1.54	-253.47	-4.275	0.00857	981.83	1356.85	1.38	1.08	1.69	375.01	2.063	0.12628	899.7	977.24	1016.85	1033.53	846.78	781.34	641.03	644.29	1871.4	1046.44	1211.58	1297.97
200991_s_at	SNX17: sorting nexin 17	NM_014748	9784	g7661889	1281	1352.3	1.06	0.9	1.21	71.3	0.589	0.592422	1281	1223.63	-1.05	-0.97	-1.14	-57.37	-0.953	0.383683	1202.75	1337.02	1330.66	1253.56	1568.95	1539.25	1161.82	1139.17	1335.17	1276.48	1107.89	1174.98
200992_at	IPO7: importin 7	AL137335	10527	Hs.5151.0	2728.87	2401.45	-1.14	-1.05	-1.24	-327.43	-2.546	0.045478	2728.87	2125.26	-1.28	-0.95	-1.98	-603.62	-1.316	0.274625	2874.21	2842.25	2527.26	2671.78	2187.63	2354.54	2670.76	2392.87	1129.04	1593.81	2931.36	2846.82
200993_at	IPO7: importin 7	AA939270	10527	Hs.5151.0	2750.2	2192.73	-1.25	-1.18	-1.33	-557.47	-6.056	0.004488	2750.2	2016.86	-1.36	-1.02	-2.04	-733.34	-1.781	0.165141	2820.72	2955.54	2660.15	2564.39	2172	2190.69	2129.23	2279	1144.05	1533.74	2817.8	2571.85
200994_at	IPO7: Importin 7	BG291787	10527	Hs.5151.0	2357.5	1701.02	-1.39	-1.23	-1.56	-656.48	-4.541	0.005071	2357.5	1869.69	-1.26	-0.92	-1.97	-487.81	-1.155	0.320744	2533.17	2552.24	2293.24	2051.35	1819.22	1860.14	1505.85	1618.86	1073.73	1273.43	2654.14	2477.45
200995_at	IPO7: Importin 7	AI741392	10527	Hs.5151.0	930.26	675.8	-1.38	-1.24	-1.51	-254.46	-4.881	0.008184	930.26	788.83	-1.18	-0.85	-1.89	-141.43	-0.764	0.494105	1004.08	1005.12	909.58	802.27	719.13	698.07	632.37	653.63	460.07	500.67	1130.64	1063.95
200996_at	ACTR3: ARP3 actin-related protein 3 homolog (yeast)	NM_005721	10096	g7262289	6165.51	5241.29	-1.18	-0.98	-1.46	-924.22	-1.483	0.233874	6165.51	5589.34	-1.1	-1.05	-1.17	-576.17	-3.095	0.045998	6146.93	6050.08	6253.6	6211.44	4207.55	4122.18	6309.62	6325.8	5060.57	5727.11	5877.57	5692.1
200997_at	RBM4: RNA binding motif protein 4	NM_002896	5936	g4506444	3483.34	3790.14	1.09	0.98	1.2	306.8	1.39	0.214246	3483.34	3481.9	-1	-0.91	-1.1	-1.44	-0.007	0.994522	3652.17	3028.33	3482.22	3770.66	3992.14	4093.92	3589.34	3485.16	3201.33	3398.03	3577.72	3750.51
200998_s_at	CKAP4: cytoskeleton-associated protein 4	AW029619	10970	Hs.74368.0	94.93	93.88	-1.01	-0.88	-1.19	-1.04	-0.121	0.910385	94.93	100.95	1.06	0.79	1.35	6.02	0.373	0.732488	99.62	87.52	96.62	95.95	110.93	93.21	99.71	71.69	67.76	79.7	127.16	129.16
200999_s_at	CKAP4: cytoskeleton-associated protein 4	NM_006825	10970	g5803112	172.04	109.98	-1.56	-1.15	-2.17	-62.06	-2.379	0.057546	172.04	167.05	-1.03	-0.58	-3.49	-4.98	-0.067	0.950155	141.82	131.24	203.99	211.09	120.55	150.36	84.59	84.41	38.18	48.97	295.98	285.07
201000_at	AARS: alanyl-tRNA synthetase	NM_001605	16	g4501840	2465.1	2079.45	-1.19	-1.11	-1.27	-385.65	-4.361	0.005272	2465.1	2873.19	1.17	1.11	1.23	408.09	5.078	0.002281	2598.03	2495.2	2332.48	2434.68	2244.95	2140.42	1968.54	1963.88	2898.64	2714.3	2992.85	2886.97
201001_s_at	TMEM189-UBE2V1 /// UBE2V1: ubiquitin-conjugating enzyme E2 variant 1 /// TMEM189-UBE2V1	BG164064	387522 /// 7335	Hs.75875.0	1456.4	1465.33	1.01	0.95	1.06	8.93	0.194	0.85707	1456.4	1413.16	-1.03	-0.92	-1.17	-43.24	-0.414	0.705885	1472.7	1443.53	1476.36	1433	1584.54	1404.63	1389.54	1482.61	1271.71	1231.87	1684.84	1464.21
201002_s_at	TMEM189-UBE2V1 /// UBE2V1: ubiquitin-conjugating enzyme E2 variant 1 /// TMEM189-UBE2V1	U39361	387522 /// 7335	g1066081	2683.48	2539.4	-1.06	-1.01	-1.11	-144.08	-1.906	0.11399	2683.48	3120.37	1.16	1.07	1.26	436.89	2.826	0.045171	2856.15	2689.23	2633.12	2555.43	2651.41	2464.89	2543.3	2498.02	3213.48	2700.88	3288.97	3278.17
201003_x_at	LOC730052 /// RNPEP /// TMEM189 /// TMEM189-UBE2V1 /// UBE2V1: arginyl aminopeptidase (aminopeptidase B) /// ubiquitin-conjugating enzyme E2 variant 1 /// transmembrane protein 189 /// TMEM189-UBE2V1 /// similar to ubiquitin-conjugating enzyme E2 variant 1 isoform d	NM_003349	387521 /// 387522 /// 6051 /// 730052 /// 7335	g12025659	968.88	1026.02	1.06	0.89	1.25	57.13	0.557	0.602049	968.88	1030.6	1.06	0.86	1.28	61.71	0.506	0.637415	942.93	832.44	1075.64	1024.53	1160.15	1184.16	938.64	821.13	818.39	868.54	1177.51	1257.94
201004_at	SSR4: signal sequence receptor, delta (translocon-associated protein delta)	NM_006280	6748	g5454089	5092.66	5731.83	1.13	1.07	1.19	639.17	3.642	0.011072	5092.66	4709.55	-1.08	-0.94	-1.26	-383.11	-0.915	0.418954	5249.6	5125.17	4753.62	5242.24	5952.3	5945.49	5609.85	5419.67	3896.62	4150.57	5277.2	5513.8
201005_at	CD9: CD9 molecule	NM_001769	928	g4502692	55.88	24.38	-2.29	-1.96	-2.76	-31.5	-11.394	0.000167	55.88	109.31	1.96	0.6	3.32	53.43	1.158	0.330635	59.62	54.68	55.32	53.89	27.73	29.36	19.44	20.98	50.44	76.16	246.79	63.83
201006_at	PRDX2: peroxiredoxin 2	NM_005809	7001	g5902725	27.84	30.84	1.11	0.82	1.47	3	0.573	0.589491	27.84	17.89	-1.56	-1.17	-2.12	-9.94	-2.521	0.046728	22.79	22.99	35.42	30.13	18.21	33.82	36.83	34.47	25.12	15.16	14.05	17.25
201007_at	HADHB: hydroxyacyl-Coenzyme A dehydrogenase/3-ketoacyl-Coenzyme A thiolase/enoyl-Coenzyme A hydratase (trifunctional protein), beta subunit	NM_000183	3032	g4504326	2501.14	3548.41	1.42	1.3	1.55	1047.27	6.401	0.001385	2501.14	3396.54	1.36	1.28	1.44	895.39	9.537	0.000584	2406.89	2343.38	2734.56	2519.74	3317.43	3297.88	3806.73	3771.61	3453.7	3290.69	3448.32	3393.45
201009_s_at	TXNIP: thioredoxin interacting protein	AI439556	10628	Hs.179526.0	89.77	59.83	-1.5	-1.2	-1.93	-29.94	-2.983	0.02459	89.77	60.72	-1.48	-1.26	-1.71	-29.05	-3.833	0.017905	103.78	70.92	89.2	95.16	70.19	39.33	69.83	59.97	58.99	54.86	59.93	69.1
201010_s_at	TXNIP: thioredoxin interacting protein	NM_006472	10628	g5454161	36.04	33.26	-1.08	-0.52	-2.06	-2.78	-0.208	0.842267	36.04	38.65	1.07	0.48	2.32	2.61	0.163	0.875866	54.6	12.19	24.18	53.19	49.99	11.86	31.4	39.8	38.35	30.32	14.58	71.34
201011_at	RPN1: ribophorin I	NM_002950	6184	g4506674	3359.32	3720.3	1.11	1.06	1.15	360.98	4.095	0.008863	3359.32	3129.08	-1.07	-1.02	-1.14	-230.24	-2.117	0.095831	3492.73	3365.51	3289.72	3289.32	3795.72	3891.73	3604.58	3589.15	3139.22	2850.12	3275.36	3251.6
201012_at	ANXA1: annexin A1	NM_000700	301	g4502100	5530.17	3434.14	-1.61	-1.22	-2.15	-2096.04	-2.765	0.036419	5530.17	2130.27	-2.6	-1.84	-3.95	-3399.9	-4.567	0.005357	6731.8	6458.71	4378.81	4551.39	4368.64	3995.6	2688.2	2684.11	2495.17	3128.13	1489.88	1407.89
201013_s_at	PAICS: phosphoribosylaminoimidazole carboxylase, phosphoribosylaminoimidazole succinocarboxamide synthetase	AA902652	10606	Hs.117950.0	8472.63	5978.77	-1.42	-1.21	-1.71	-2493.86	-3.957	0.023011	8472.63	7763.56	-1.09	-0.99	-1.22	-709.07	-1.435	0.231076	8830.62	8142.2	8618.26	8299.43	4984.03	4859.31	7040.27	7031.46	8752.93	8374.31	6899.46	7027.52
201014_s_at	PAICS: phosphoribosylaminoimidazole carboxylase, phosphoribosylaminoimidazole succinocarboxamide synthetase	NM_006452	10606	g5453538	4609.43	3312.06	-1.39	-1.34	-1.45	-1297.36	-14.357	7e-06	4609.43	2767	-1.67	-1.46	-1.94	-1842.43	-7.666	0.002867	4495.83	4773.09	4536.56	4632.23	3261.98	3326.35	3173.24	3486.67	2450.87	3451.02	2661	2505.1
201015_s_at	JUP: junction plakoglobin	NM_021991	3728	g12056467	39.37	41.68	1.06	0.87	1.27	2.3	0.484	0.649964	39.37	25.82	-1.52	-1.25	-1.9	-13.55	-3.69	0.010706	38.87	43.16	42.62	32.85	36.84	32.98	51.07	45.82	24.96	33.68	24.22	20.43
201016_at	EIF1AX: eukaryotic translation initiation factor 1A, X-linked	BE542684	1964	Hs.4310.0	2474.74	2391.29	-1.03	-0.82	-1.39	-83.45	-0.225	0.836344	2474.74	2452.08	-1.01	-0.96	-1.07	-22.66	-0.277	0.792188	2389.64	2442.79	2608.69	2457.85	1788.89	1731.19	2889.44	3155.65	2309.35	2539.79	2589.78	2369.4
201017_at	EIF1AX: eukaryotic translation initiation factor 1A, X-linked	BG149698	1964	Hs.4310.0	1469.19	1402.84	-1.05	-0.96	-1.14	-66.35	-0.891	0.418503	1469.19	1275.27	-1.15	-0.98	-1.38	-193.92	-1.472	0.226566	1537.12	1457.47	1502.06	1380.12	1296.7	1279.79	1526.1	1508.78	1367.76	1591.67	1104.95	1036.71
201018_at	EIF1AX: eukaryotic translation initiation factor 1A, X-linked	AL079283	1964	Hs.4310.0	2608.82	2060.73	-1.27	-1.18	-1.35	-548.09	-5.075	0.011468	2608.82	2307.34	-1.13	-0.9	-1.51	-301.48	-0.836	0.455435	2877.53	2667.59	2486.79	2403.36	2094.58	2080.12	2080.3	1987.92	2954.11	2852.22	1732.51	1690.5
201019_s_at	EIF1AP1 /// EIF1AX: eukaryotic translation initiation factor 1A, X-linked /// eukaryotic translation initiation factor 1A pseudogene 1	NM_001412	1964 /// 280661	g4503498	4518.35	4505.37	-1	-0.89	-1.14	-12.98	-0.039	0.97087	4518.35	4414.22	-1.02	-0.96	-1.09	-104.13	-0.628	0.558358	4415.41	4579.85	4728.66	4349.47	4012.28	3913.08	4904.2	5191.94	4471.81	4770.89	4323.16	4091.02
201020_at	YWHAH: tyrosine 3-monooxygenase/tryptophan 5-monooxygenase activation protein, eta polypeptide	NM_003405	7533	g4507950	2352	2573.43	1.09	1.05	1.14	221.43	3.538	0.013359	2352	1928.72	-1.22	-0.84	-2.21	-423.28	-0.803	0.479838	2270.91	2315.2	2327.12	2494.77	2649.14	2524.44	2629.32	2490.81	755.78	1329.89	2780.34	2848.87
201021_s_at	DSTN: destrin (actin depolymerizing factor)	BF697964	11034	Hs.82306.0	4565.3	3805	-1.2	-1.1	-1.32	-760.3	-3.397	0.026717	4565.3	3370.76	-1.35	-1.08	-1.8	-1194.54	-2.321	0.098043	4555.67	4802.92	4379.11	4523.51	3458.92	3454.22	4046.94	4259.91	1864.59	3774.31	4075.82	3768.32
201022_s_at	DSTN: destrin (actin depolymerizing factor)	NM_006870	11034	g6466447	6092.37	5115.23	-1.19	-1.14	-1.25	-977.14	-6.395	0.00082	6092.37	5965.43	-1.02	-0.97	-1.08	-126.94	-0.655	0.537954	6409.44	6113.86	5999.43	5846.74	4974.21	4927.6	5256.45	5302.66	5536.97	5972.07	6238.46	6114.21
201023_at	TAF7: TAF7 RNA polymerase II, TATA box binding protein (TBP)-associated factor, 55kDa	NM_005642	6879	g5032148	2274.33	2186.7	-1.04	-0.85	-1.3	-87.63	-0.312	0.767568	2274.33	2761.5	1.21	0.93	1.53	487.17	1.215	0.2909	2257.69	1844.78	2514.7	2480.14	1747.09	1812.44	2587.65	2599.62	3502.32	3293.85	2141.13	2108.71
201024_x_at	EIF5B: eukaryotic translation initiation factor 5B	BG261322	9669	Hs.158688.0	5062.59	4675.3	-1.08	-1.03	-1.14	-387.29	-2.647	0.048252	5062.59	5320.63	1.05	0.97	1.13	258.04	1.09	0.343276	5268.16	5053.68	4956.59	4971.94	4378.95	4546.76	4870.83	4904.67	4732.02	5799.02	5497.15	5254.32
201025_at	EIF5B: eukaryotic translation initiation factor 5B	AB018284	9669	Hs.158688.0	1245.8	966.5	-1.29	-1.24	-1.35	-279.3	-10.427	7.6e-05	1245.8	1496.79	1.2	1.02	1.38	251	1.834	0.161518	1247.77	1289.31	1230.82	1215.3	908.5	998.56	999.84	959.09	1883.07	1484.35	1344.69	1275.06
201026_at	EIF5B: eukaryotic translation initiation factor 5B	AB018284	9669	Hs.158688.0	537.56	418.08	-1.29	-1.24	-1.33	-119.48	-10.87	0.000236	537.56	583.12	1.08	0.96	1.21	45.56	1.106	0.34149	534.67	562.38	538.74	514.47	410.27	417.55	412.39	432.13	695.11	584.84	536.12	516.44
201027_s_at	EIF5B: eukaryotic translation initiation factor 5B	NM_015904	9669	g7706231	1814.91	1453.95	-1.25	-1.17	-1.33	-360.96	-6.063	0.00216	1814.91	1942.59	1.07	1	1.14	127.69	1.76	0.151344	1856.31	1862.24	1736.86	1804.21	1538.74	1333.63	1542.68	1400.74	1789.26	2113.45	1942.64	1925.02
201028_s_at	CD99: CD99 molecule	U82164	4267	g2149134	4016.98	4052.25	1.01	0.78	1.24	35.26	0.064	0.953052	4016.98	3512.53	-1.14	-1.02	-1.29	-504.45	-2.016	0.125834	4114.07	4137.82	3876.98	3939.07	5272.11	4661.5	2931.17	3344.2	2877.85	4032.1	3675.86	3464.32
201029_s_at	CD99: CD99 molecule	NM_002414	4267	g4505182	9216.43	9809.14	1.06	0.93	1.2	592.71	0.784	0.488	9216.43	9480.27	1.03	0.98	1.08	263.84	1.028	0.359542	9518.14	9207.03	9039.01	9101.54	11090.4	11114	8398.61	8633.58	10169.1	9314.61	9129.73	9307.63
201030_x_at	LDHB: lactate dehydrogenase B	NM_002300	3945	g4557031	15717.8	15381.7	-1.02	-0.94	-1.12	-336.15	-0.4	0.713737	15717.8	15504	-1.01	-0.99	-1.03	-213.8	-1.139	0.312573	15705.6	15452	15518.9	16194.8	17023.4	16543.4	14249	13711	15627.1	15405.8	15319.2	15664
201031_s_at	HNRPH1: heterogeneous nuclear ribonucleoprotein H1 (H)	NM_005520	3187	g5031752	9466.54	9262.22	-1.02	-1	-1.04	-204.33	-1.68	0.160501	9466.54	9413.45	-1.01	-0.97	-1.05	-53.1	-0.233	0.826057	9334.08	9331.04	9785.75	9415.3	9205.1	9426.77	9187.46	9229.54	9850.84	9658.06	9096.76	9048.14
201032_at	BLCAP: bladder cancer associated protein	NM_006698	10904	g5729737	1236.58	1697.61	1.37	1.13	1.62	461.03	2.527	0.081039	1236.58	1706.64	1.38	1.16	1.61	470.06	2.845	0.060307	1202.65	1167.71	1280.76	1295.19	1328.76	1453.64	2052.63	1955.4	1362.37	1499.22	2018.81	1946.16
201033_x_at	RPLP0: ribosomal protein, large, P0	NM_001002	6175	g4506666	14423.7	15346.4	1.06	1.02	1.11	922.69	2.302	0.094882	14423.7	15112	1.05	1.02	1.07	688.31	3.173	0.029141	14663	14389.4	14187.4	14454.9	15939.6	16074.6	14854.7	14516.6	15092.8	14578.8	15310.4	15466
201034_at	ADD3: adducin 3 (gamma)	BE545756	120	Hs.8110.0	1888.95	3154.18	1.67	1.56	1.8	1265.23	14.124	4.1e-05	1888.95	2517.84	1.33	0.92	1.76	628.89	1.319	0.27452	2114.53	1805.13	1862.01	1774.13	3046.88	3114.74	3209.69	3245.42	1567.88	1855.01	3405.8	3242.68
201035_s_at	HADH: hydroxyacyl-Coenzyme A dehydrogenase	BC000306	3033	g12653080	1544.21	1494.43	-1.03	-0.91	-1.19	-49.79	-0.403	0.711919	1544.21	1300.82	-1.19	-1.04	-1.38	-243.39	-2.193	0.105911	1527.86	1575.17	1597.69	1476.12	1670.15	1733.92	1299.39	1274.23	990.01	1322.97	1457.37	1432.93
201036_s_at	HADH: hydroxyacyl-Coenzyme A dehydrogenase	NM_005327	3033	g4885386	3598.52	2928.25	-1.23	-1.15	-1.31	-670.27	-4.843	0.011178	3598.52	3854.27	1.07	1.01	1.14	255.75	1.892	0.147372	3875.4	3768.63	3422.55	3327.48	2904.96	3024.9	2951.77	2831.37	3934.9	3806.31	3838.85	3837
201037_at	PFKP: phosphofructokinase, platelet	NM_002627	5214	g11321600	4356.68	4570.77	1.05	0.88	1.22	214.1	0.488	0.656644	4356.68	4097.67	-1.06	-1	-1.13	-259	-1.654	0.156381	4314.01	4179.7	4337.24	4595.76	5327.9	5302.67	3853.99	3798.53	4359.63	4282.13	3850.26	3898.68
201038_s_at	ANP32A: Acidic (leucine-rich) nuclear phosphoprotein 32 family, member A	T67821	8125	Hs.285013.0	4293.81	3781.53	-1.14	-1.07	-1.21	-512.28	-3.46	0.016299	4293.81	4391.65	1.02	0.96	1.09	97.84	0.573	0.592443	4107.17	4221.71	4498.45	4347.91	3524.28	3739.81	3749.79	4112.23	4049.04	4297.31	4756.35	4463.92
201039_s_at	RAD23A: RAD23 homolog A (S. cerevisiae)	BF572938	5886	Hs.180455.0	2081.04	1335.49	-1.56	-1.1	-2.64	-745.55	-2.224	0.109201	2081.04	2308.95	1.11	0.92	1.3	227.91	0.963	0.401893	2097.04	2178.24	2095.85	1953.05	817.46	707.3	1875.03	1942.18	3003.1	2120.38	2031.98	2080.33
201040_at	GNAI2: guanine nucleotide binding protein (G protein), alpha inhibiting activity polypeptide 2	NM_002070	2771	g4504040	502.55	506.6	1.01	0.87	1.19	4.05	0.087	0.935226	502.55	563.24	1.12	0.69	1.6	60.68	0.448	0.679145	423.72	450.9	514.5	621.09	542.28	472.45	522.53	489.14	942.4	491.27	431.18	388.09
201041_s_at	DUSP1: dual specificity phosphatase 1	NM_004417	1843	g7108342	547.52	654.08	1.19	1.04	1.36	106.56	2.032	0.113379	547.52	377.99	-1.45	-1.34	-1.57	-169.53	-7.324	0.000632	601.14	517.77	550.39	520.79	714.34	753.96	541.7	606.34	377.85	368.63	412.87	352.63
201043_s_at	ANP32A: acidic (leucine-rich) nuclear phosphoprotein 32 family, member A	NM_006305	8125	g5453879	3198.49	2885.15	-1.11	-1.02	-1.2	-313.34	-2.099	0.094146	3198.49	2480.67	-1.29	-1.04	-1.67	-717.82	-1.991	0.119223	2971.67	3006.56	3285.3	3530.43	2979.56	3006.46	2692.19	2862.36	1475.6	2856.62	2839.48	2751
201046_s_at	RAD23A: RAD23 homolog A (S. cerevisiae)	NM_005053	5886	g4826963	3360.11	2312.46	-1.45	-1	-2.65	-1047.64	-1.633	0.196257	3360.11	3580.16	1.07	0.95	1.19	220.05	0.906	0.412561	3583.99	3490.03	3150.34	3216.07	1229.11	1207.13	3315.19	3498.43	4143.37	3704.07	3178.14	3295.06
201047_x_at	LOC150786 /// RAB6A: RAB6A, member RAS oncogene family /// RAB6C-like	BC003617	150786 /// 5870	g13177663	2935.94	2977.45	1.01	0.81	1.22	41.51	0.113	0.917388	2935.94	3463.09	1.18	1.09	1.27	527.15	3.419	0.035766	2964.92	2865.06	2893.8	3019.95	2391.87	2299.82	3514.08	3704.02	3145.12	3268.87	3736.92	3701.43
201049_s_at	RP5-1033B10.18 /// RPS18: ribosomal protein S18 /// similar to ribosomal protein S18	NM_022551	6222 /// 730754	g11968181	16936.9	17053.6	1.01	0.99	1.03	116.71	0.585	0.598146	16936.9	17169.5	1.01	0.99	1.03	232.58	1.096	0.350724	16871.6	17000	16965.4	16910.5	17393.5	17325.6	16961.2	16534.1	16822.1	16789.8	17563.3	17502.7
201050_at	PLD3: phospholipase D family, member 3	NM_012268	23646	g7110640	117.39	88.12	-1.33	-1.09	-1.68	-29.27	-2.38	0.062365	117.39	123.07	1.05	0.83	1.29	5.68	0.351	0.742938	121.6	129.09	120.35	98.5	75.23	68.73	115.01	93.51	129.85	79.76	136.95	145.7
201051_at	ANP32A: acidic (leucine-rich) nuclear phosphoprotein 32 family, member A	BE560202	8125	Hs.285013.0	7517.9	6457.21	-1.16	-1.11	-1.22	-1060.69	-5.507	0.003702	7517.9	7313.94	-1.03	-0.92	-1.16	-203.96	-0.403	0.708868	7234.43	7212.01	7849.62	7775.54	6575.1	6200.58	6578.9	6474.25	6173.3	6888.65	8005.72	8188.11
201052_s_at	PSMF1: proteasome (prosome, macropain) inhibitor subunit 1 (PI31)	BG029917	9491	Hs.75925.0	1780.53	1850.8	1.04	0.94	1.14	70.28	0.646	0.562551	1780.53	1914.17	1.08	1.04	1.11	133.65	3.98	0.013058	1812.58	1740.25	1775.69	1793.58	1750.47	1634.44	1882.48	2135.83	1977.41	1833.35	1921.67	1924.26
201053_s_at	PSMF1: proteasome (prosome, macropain) inhibitor subunit 1 (PI31)	NM_006814	9491	g5803122	1631.18	1514.69	-1.08	-0.93	-1.24	-116.49	-0.818	0.44953	1631.18	1707.61	1.05	0.92	1.2	76.43	0.568	0.597322	1847.65	1304.87	1764.09	1608.11	1418.11	1388.62	1730.18	1521.85	1557.73	1664.1	1766.81	1841.79
201054_at	HNRNPA0: heterogeneous nuclear ribonucleoprotein A0	BE966599	10949	Hs.77492.0	3733.99	3237.76	-1.15	-0.92	-1.52	-496.23	-0.998	0.375965	3733.99	4601.64	1.23	0.95	1.53	867.65	1.338	0.26109	3475.17	3370.23	4020.2	4070.37	4082.63	3994.72	2454.65	2419.06	3338.92	3736.32	5814.36	5516.97
201055_s_at	HNRNPA0: heterogeneous nuclear ribonucleoprotein A0	NM_006805	10949	g5803035	3187.02	3028.85	-1.05	-1.03	-1.07	-158.17	-4.369	0.011132	3187.02	3171.02	-1.01	-0.95	-1.07	-16.01	-0.138	0.897757	3129.61	3131.02	3231.84	3255.63	2985.82	3040.49	3051.62	3037.48	2904.18	3390.27	3076.72	3312.9
201056_at	GOLGB1: golgin B1, golgi integral membrane protein	N53479	2804	Hs.7844.0	429.34	511.37	1.19	1.03	1.38	82.03	1.95	0.099344	429.34	460.78	1.07	0.87	1.31	31.44	0.559	0.600707	470.66	484.08	365.09	397.53	514.67	597.37	468.22	465.24	483.66	588.19	388.82	382.45
201057_s_at	GOLGB1: golgin B1, golgi integral membrane protein	NM_004487	2804	g4758453	358.33	533.31	1.49	1.34	1.64	174.98	5.822	0.004852	358.33	428.04	1.19	1.13	1.26	69.71	5.442	0.002565	361.38	330.42	382.63	358.88	479.22	528.28	611.67	514.07	439.79	438.27	424.32	409.77
201059_at	CTTN: cortactin	NM_005231	2017	g4885204	82.43	466.77	5.66	2.18	9.3	384.34	2.208	0.11416	82.43	315.54	3.83	3.08	4.68	233.11	6.994	0.004905	98.73	82.19	71.96	76.85	780.23	755.53	178.57	152.73	358.79	384.48	257.52	261.37
201060_x_at	STOM: stomatin	AI537887	2040	Hs.160483.0	206.79	183.88	-1.12	-0.95	-1.3	-22.91	-1.185	0.309932	206.79	182.37	-1.13	-0.95	-1.34	-24.42	-1.162	0.302236	200.61	159.94	248.92	217.68	181.91	179.85	199.56	174.2	162.07	182.75	209.07	175.59
201061_s_at	STOM: stomatin	M81635	2040	g181183	555.18	442.94	-1.25	-1.16	-1.35	-112.24	-4.295	0.016763	555.18	475.16	-1.17	-1.05	-1.3	-80.01	-2.372	0.055829	522.04	507.4	616.74	574.53	451.03	456.76	440.7	423.26	481.2	463.99	532.21	423.26
201063_at	RCN1: reticulocalbin 1, EF-hand calcium binding domain	NM_002901	5954	g4506454	791.44	798.81	1.01	0.87	1.15	7.37	0.112	0.917622	791.44	739.32	-1.07	-0.88	-1.37	-52.11	-0.525	0.634416	831.43	782.93	771.55	779.84	689.08	690.05	942.5	873.6	962.65	845.27	590.97	558.39
201064_s_at	PABPC4: poly(A) binding protein, cytoplasmic 4 (inducible form)	NM_003819	8761	g6552335	4360.79	4182.07	-1.04	-0.92	-1.21	-178.71	-0.511	0.642593	4360.79	4720.37	1.08	0.96	1.21	359.59	1.081	0.353742	4478.87	4217.44	4460.79	4286.05	3555.06	3618.63	4782.22	4772.38	4299.4	4027.77	5249.31	5305
201065_s_at	GTF2I /// GTF2IP1 /// LOC100093631 /// LOC732437: general transcription factor II, i /// general transcription factor II, i, pseudogene 1 /// similar to general transcription factor II, i isoform 1 /// general transcription factor II, i, pseudogene	NM_001518	100093631 /// 2969 /// 2970 /// 732437	g4504202	2499.42	2726.44	1.09	0.82	1.37	227.02	0.551	0.617578	2499.42	2307.76	-1.08	-0.84	-1.5	-191.66	-0.484	0.659384	2424.74	2312.14	2669.34	2591.46	3376.25	3471.52	2103.52	1954.48	1404.69	1917.55	2912.08	2996.7
201066_at	CYC1: cytochrome c-1	NM_001916	1537	g4503184	3627.42	3423.68	-1.06	-1	-1.12	-203.74	-1.622	0.190803	3627.42	4085.82	1.13	1.07	1.19	458.39	3.709	0.029449	3902.18	3746.58	3366.48	3494.46	3349.42	3418.75	3513.79	3412.75	4161.32	4061.87	4049.78	4070.3
201067_at	Hs.61153.0	BF215487		Hs.61153.0	847.43	928.46	1.1	0.87	1.32	81.03	0.694	0.53584	847.43	1210.08	1.43	1.35	1.51	362.65	9.69	0.000511	863.4	878.3	840.64	807.4	1156.29	1099.04	739.82	718.71	1291.71	1125.27	1204.95	1218.4
201068_s_at	PSMC2: proteasome (prosome, macropain) 26S subunit, ATPase, 2	NM_002803	5701	g4506208	6702.38	6436.02	-1.04	-0.97	-1.12	-266.36	-0.931	0.398092	6702.38	6688.62	-1	-0.92	-1.09	-13.76	-0.041	0.968494	6657.26	6013.18	6975.43	7163.65	6746.83	6574.36	6200.01	6222.87	6089.66	7135.55	6724.17	6805.11
201070_x_at	SF3B1: splicing factor 3b, subunit 1, 155kDa	AI739389	23451	Hs.13453.0	1806.21	2030.38	1.12	0.94	1.31	224.17	1.091	0.347786	1806.21	1470.62	-1.23	-1.06	-1.45	-335.59	-2.357	0.082572	1839.96	1885.71	1829.88	1669.28	2518.03	2194.77	1739.78	1668.96	1656.3	1745.74	1245.62	1234.82
201071_x_at	SF3B1: splicing factor 3b, subunit 1, 155kDa	NM_012433	23451	g6912653	6716.38	7105.75	1.06	1.01	1.11	389.37	2.037	0.104538	6716.38	6089.11	-1.1	-1	-1.23	-627.27	-1.634	0.192178	6780.4	6765.32	6854.22	6465.57	6770.89	7552.73	7175.61	6923.76	6656.59	6798.05	5595.13	5306.65
201072_s_at	SMARCC1: SWI/SNF related, matrix associated, actin dependent regulator of chromatin, subfamily c, member 1	AW152160	6599	Hs.172280.0	3383.47	3546.28	1.05	0.87	1.24	162.81	0.427	0.689546	3383.47	3520.71	1.04	0.93	1.17	137.24	0.575	0.586479	3817.91	2997.79	3398.26	3319.91	4387.51	3748.42	3259.13	2790.06	3513.3	3973.54	3436.98	3159.01
201073_s_at	SMARCC1: SWI/SNF related, matrix associated, actin dependent regulator of chromatin, subfamily c, member 1	AL040633	6599	Hs.172280.0	1202.99	1086.56	-1.11	-1.01	-1.22	-116.42	-1.813	0.137318	1202.99	1094.81	-1.1	-1.04	-1.16	-108.18	-2.843	0.030111	1224.57	1122.46	1257.36	1207.56	1195.86	1165.28	1035.92	949.2	1046.64	1162.29	1099	1071.32
201074_at	SMARCC1: SWI/SNF related, matrix associated, actin dependent regulator of chromatin, subfamily c, member 1	AA593983	6599	Hs.172280.0	2850.49	2534.79	-1.12	-1.04	-1.23	-315.7	-2.416	0.071304	2850.49	2922.7	1.03	0.93	1.12	72.2	0.457	0.673034	2775.87	2751.4	2973.73	2900.96	2629.47	2828.94	2359.29	2321.44	3312.79	2998.29	2700.2	2679.5
201075_s_at	SMARCC1: SWI/SNF related, matrix associated, actin dependent regulator of chromatin, subfamily c, member 1	NM_003074	6599	g4507078	1674.98	1529.35	-1.1	-0.95	-1.29	-145.63	-1.04	0.363092	1674.98	1459.78	-1.15	-0.97	-1.39	-215.2	-1.369	0.252729	1610.5	1591.99	1745.49	1751.95	1873.55	1601.07	1362.85	1279.92	1018.7	1688.11	1515.02	1617.28
201076_at	NHP2L1: NHP2 non-histone chromosome protein 2-like 1 (S. cerevisiae)	NM_005008	4809	g4826859	1886.97	1557.03	-1.21	-1.13	-1.3	-329.94	-4.362	0.012739	1886.97	2244.06	1.19	1.05	1.34	357.09	2.283	0.078056	1929.31	2066.21	1753.25	1799.09	1567.87	1531.08	1500.44	1628.73	1931.66	2085.24	2467.7	2491.65
201077_s_at	NHP2L1: NHP2 non-histone chromosome protein 2-like 1 (S. cerevisiae)	AF155235	4809	g6318598	6836.39	6847.25	1	0.96	1.04	10.86	0.067	0.949156	6836.39	6198.83	-1.1	-0.99	-1.23	-637.56	-1.553	0.199037	6502.03	6727.62	6952.82	7163.1	6832.4	7061.19	6715.38	6780.04	5202.4	5983.7	6746.63	6862.59
201078_at	TM9SF2: transmembrane 9 superfamily member 2	NM_004800	9375	g4758873	1974.47	2318.27	1.17	1.09	1.26	343.8	3.3	0.038358	1974.47	1945.04	-1.02	-0.84	-1.28	-29.42	-0.121	0.91105	2035.77	1943.67	1995.91	1922.51	2158.68	2130.27	2516.53	2467.59	1301	1848.68	2341.51	2288.99
201079_at	SYNGR2: synaptogyrin 2	NM_004710	9144	g4759201	731.62	800.7	1.09	0.87	1.33	69.08	0.683	0.540045	731.62	764.93	1.05	0.84	1.26	33.31	0.356	0.743055	712.39	682.62	762.74	768.72	987.12	954.92	654.22	606.56	641.29	576.28	917.29	924.84
201080_at	PIP4K2B: phosphatidylinositol-5-phosphate 4-kinase, type II, beta	BF338509	8396	Hs.6335.0	1002.58	1031.24	1.03	0.95	1.11	28.66	0.6	0.572405	1002.58	1149.26	1.15	1.07	1.23	146.68	3.307	0.02286	926.41	954.09	1095.51	1034.32	962.56	1017.43	1047.17	1097.81	1135.52	1093.03	1186.73	1181.79
201081_s_at	PIP4K2B: phosphatidylinositol-5-phosphate 4-kinase, type II, beta	NM_003559	8396	g4505818	63.12	63.33	1	0.69	1.44	0.21	0.016	0.988013	63.12	45.5	-1.39	-1	-1.86	-17.62	-1.663	0.164385	40.13	57.16	84.25	70.93	47.93	44.66	83.58	77.16	41.3	34.25	55.75	50.69
201082_s_at	DCTN1: dynactin 1 (p150, glued homolog, Drosophila)	NM_004082	1639	g13259509	224.36	156.49	-1.43	-1.29	-1.59	-67.86	-5.427	0.002334	224.36	311.21	1.39	0.95	1.84	86.86	1.461	0.234993	196.61	221.24	241.97	237.6	164.17	136.03	157.82	167.97	486.66	245.97	259.16	253.07
201083_s_at	BCLAF1: BCL2-associated transcription factor 1	AA740754	9774	Hs.80338.0	1853.06	1626.07	-1.14	-1.03	-1.26	-226.99	-2.114	0.07909	1853.06	1523.88	-1.22	-1.11	-1.33	-329.18	-3.617	0.013271	1684.17	1830.69	2045.18	1852.2	1461.19	1542.48	1689.28	1811.31	1418.83	1516.63	1669.61	1490.44
201084_s_at	BCLAF1: BCL2-associated transcription factor 1	NM_014739	9774	g7661957	5960.23	5077.74	-1.17	-1.13	-1.22	-882.49	-6.115	0.002355	5960.23	5911.4	-1.01	-0.96	-1.06	-48.83	-0.265	0.799827	5809.75	5757.95	6323.33	5949.89	5251.24	5115.16	4954.57	4990	5567.14	5838.82	6097.83	6141.81
201085_s_at	SON: SON DNA binding protein	AA664291	6651	Hs.92909.0	1903.35	1936.58	1.02	0.89	1.17	33.23	0.213	0.838614	1903.35	1563.05	-1.22	-0.94	-1.67	-340.3	-1.239	0.277348	2207.47	1611.83	1924.49	1869.59	1722.14	1883.55	2188.75	1951.88	994.74	1353.93	2120.61	1782.93
201086_x_at	SON: SON DNA binding protein	NM_003103	6651	g4507152	3111.96	3018.56	-1.03	-0.96	-1.11	-93.4	-0.705	0.514189	3111.96	2674.19	-1.16	-0.93	-1.56	-437.77	-1.056	0.365217	3268.56	2952.48	3134.91	3091.88	2853.49	2816.23	3312.4	3092.13	1898.86	2036.69	3321.61	3439.58
201087_at	PXN: paxillin	NM_002859	5829	g4506344	200.28	294.81	1.47	1.34	1.62	94.53	6.248	0.002003	200.28	229.21	1.14	0.94	1.35	28.93	1.18	0.31045	203.59	178.96	210.66	207.93	305.62	289.25	323.44	260.93	194.44	183.3	271.05	268.05
201088_at	KPNA2: karyopherin alpha 2 (RAG cohort 1, importin alpha 1)	NM_002266	3838	g4504896	8907.11	9014.44	1.01	0.98	1.05	107.33	0.588	0.591076	8907.11	8288.1	-1.07	-1.01	-1.14	-619.01	-2.039	0.128263	8842.39	8895.24	9067.65	8823.15	8759.97	8887.46	9528.01	8882.31	8655.47	8890.52	7578.54	8027.85
201089_at	ATP6V1B2: ATPase, H+ transporting, lysosomal 56/58kDa, V1 subunit B2	NM_001693	526	g4502310	2011.07	1952.68	-1.03	-0.96	-1.1	-58.39	-0.691	0.524316	2011.07	2399.55	1.19	1.09	1.31	388.48	3.141	0.021764	1895.08	1870.31	2174.41	2104.47	1966.22	2026.97	1969.79	1847.75	2630.93	2171.21	2330.17	2465.89
201090_x_at	TUBA1B: tubulin, alpha 1b	NM_006082	10376	g5174476	13845.5	14391.7	1.04	0.97	1.11	546.23	0.94	0.412315	13845.5	13481.7	-1.03	-1	-1.05	-363.79	-1.962	0.102047	13799.4	13642.1	13786.5	14153.9	15557	15129.2	13755.4	13125.2	13837.3	13108.2	13536.9	13444.4
201091_s_at	CBX3 /// LOC653972: chromobox homolog 3 (HP1 gamma homolog, Drosophila) /// similar to chromobox homolog 3	BE748755	11335 /// 653972	Hs.278554.0	7790.18	6498.97	-1.2	-1.04	-1.41	-1291.21	-2.157	0.112992	7790.18	6543.94	-1.19	-1.13	-1.26	-1246.24	-5.242	0.003727	7543.29	7700.69	7807.05	8109.67	7531.91	7450.26	5200.43	5813.27	6086.68	7060.59	6634.89	6393.59
201092_at	RBBP7: retinoblastoma binding protein 7	NM_002893	5931	g13259504	6170.65	5685.19	-1.09	-0.93	-1.3	-485.46	-0.849	0.450836	6170.65	7034.69	1.14	1.08	1.2	864.04	4.137	0.006121	6455.15	5746.17	6210.85	6270.41	6626.68	6653.98	4701.99	4758.09	6771.3	6801.07	7242.66	7323.71
201093_x_at	SDHA /// SDHALP1 /// SDHALP2: succinate dehydrogenase complex, subunit A, flavoprotein (Fp) /// succinate dehydrogenase complex, subunit A, flavoprotein pseudogene 1 /// succinate dehydrogenase complex, subunit A, flavoprotein pseudogene 2	NM_004168	255812 /// 6389 /// 727956	g4759079	1476.4	1865.19	1.26	1.13	1.4	388.79	3.155	0.046043	1476.4	1666.8	1.13	1.07	1.19	190.4	3.501	0.021576	1482.05	1427.16	1539.86	1456.54	2107.47	2035.77	1692.54	1624.97	1584.1	1590.89	1704.71	1787.52
201094_at	RPS29: ribosomal protein S29	NM_001032	6235	g4506716	16053.8	13269	-1.21	-0.94	-1.68	-2784.78	-1.213	0.301934	16053.8	17215.8	1.07	1	1.15	1162.04	1.612	0.164638	16887.7	14296.7	16659.9	16371	9340.7	9525.57	17332.3	16877.5	16396.7	16697.4	17606.9	18162.3
201095_at	DAP: death-associated protein	NM_004394	1611	g4758119	1042	1007.2	-1.03	-0.83	-1.37	-34.8	-0.234	0.829862	1042	1055.57	1.01	0.97	1.05	13.58	0.561	0.609453	1037.01	1030.75	1039.82	1060.41	719.03	783.31	1273.52	1252.93	1038.78	1041.27	1018.33	1123.91
201096_s_at	ARF4: ADP-ribosylation factor 4	AL537042	378	Hs.75290.0	2539.92	3167.79	1.25	1.19	1.31	627.87	7.644	0.000601	2539.92	2039.49	-1.25	-1.06	-1.51	-500.43	-2.244	0.104086	2575.42	2633.18	2521.89	2429.19	3331.18	3133.01	2998.05	3208.91	1391.35	2271.19	2330.79	2164.63
201097_s_at	ARF4: ADP-ribosylation factor 4	NM_001660	378	g6995998	4815.75	6086.12	1.26	1.22	1.31	1270.37	10.122	6.9e-05	4815.75	4924.79	1.02	0.98	1.06	109.04	0.922	0.392457	5048.4	4694.21	4777.84	4742.55	6264.61	6216.98	6022.21	5840.66	4738.41	4830.74	4996.92	5133.08
201098_at	COPB2: coatomer protein complex, subunit beta 2 (beta prime)	NM_004766	9276	g4758031	3113.3	3787.14	1.22	1.16	1.27	673.84	7.257	0.000388	3113.3	2995.8	-1.04	-0.96	-1.13	-117.5	-0.777	0.479453	3111.95	2963.32	3258.88	3119.06	3589.33	3825.63	3810.01	3923.59	2638.78	2989.99	3313.65	3040.78
201099_at	USP9X: ubiquitin specific peptidase 9, X-linked	AA824386	8239	Hs.77578.0	638.78	768.63	1.2	1.08	1.34	129.86	2.759	0.043006	638.78	735.34	1.15	1.03	1.28	96.56	2.029	0.102797	594.62	604.63	677.62	678.23	674.56	724.44	842.61	832.92	616.71	789.79	736.62	798.24
201100_s_at	USP9X: ubiquitin specific peptidase 9, X-linked	NM_004652	8239	g11641424	1157.16	1441.63	1.25	1.14	1.37	284.47	4.404	0.009173	1157.16	1222.2	1.06	0.96	1.17	65.04	0.951	0.384581	1197.3	999.05	1272.09	1160.21	1382.1	1404.23	1472.95	1507.25	1236.04	1321.06	1170.05	1161.68
201101_s_at	BCLAF1: BCL2-associated transcription factor 1	BE963370	9774	Hs.80338.0	5243.23	5057.68	-1.04	-0.98	-1.1	-185.55	-0.985	0.372081	5243.23	5244.87	1	0.9	1.11	1.64	0.005	0.996227	5086.75	4930.28	5689.82	5266.05	5254.84	5169.38	4949.19	4857.29	4630.01	4888.45	5697.77	5763.24
201102_s_at	PFKL: phosphofructokinase, liver	NM_002626	5211	g4505746	196.57	201.04	1.02	0.88	1.18	4.47	0.247	0.814691	196.57	211.65	1.08	0.95	1.22	15.07	0.972	0.37007	220.66	180.74	204.26	180.63	215.14	230.68	198.56	159.78	193.44	188.31	231.35	233.49
201103_x_at	LOC728980 /// NBPF10 /// NBPF11 /// NBPF15 /// NBPF16 /// NBPF20 /// NBPF8 /// XXyac-YX155B6.1: neuroblastoma breakpoint family, member 11 /// neuroblastoma breakpoint family, member 15 /// neuroblastoma breakpoint family, member 20 /// neuroblastoma breakpoint family, member 10 /// neuroblastoma breakpoint family, member 8 /// CLIP-190-like /// neuroblastoma breakpoint family, member 16 /// hypo…	BE299495	200030 /// 284565 /// 400818 /// 440673 /// 641559 /// 728912 /// 728936 /// 728980	Hs.218329.0	3755.15	4126.35	1.1	1.04	1.16	371.2	2.796	0.034369	3755.15	4173.98	1.11	1.01	1.22	418.83	1.79	0.140092	4027.62	3553.52	3619.41	3820.05	4233.09	4193.64	4185.76	3892.93	3769.63	3866.91	4465.14	4594.25
201104_x_at	LOC728980 /// LOC730476 /// NBPF10 /// NBPF11 /// NBPF14 /// NBPF15 /// NBPF16 /// NBPF20 /// NBPF8 /// XXyac-YX155B6.1: neuroblastoma breakpoint family, member 14 /// neuroblastoma breakpoint family, member 11 /// neuroblastoma breakpoint family, member 15 /// neuroblastoma breakpoint family, member 20 /// neuroblastoma breakpoint family, member 10 /// neuroblastoma breakpoint family, member 8 /…	NM_015383	200030 /// 25832 /// 284565 /// 400818 /// 440673 /// 641559 /// 728912 /// 728936 /// 728980 /// 730476	g7657016	1041.81	1216.8	1.17	1.04	1.29	175	2.248	0.10476	1041.81	973.62	-1.07	-0.78	-1.69	-68.18	-0.314	0.774158	1040.3	1047.72	1006.33	1072.87	1411.79	1250.34	1153.47	1051.61	346.09	1037.87	1191.66	1318.89
201105_at	LGALS1: lectin, galactoside-binding, soluble, 1 (galectin 1)	NM_002305	3956	g6006015	316.54	859.22	2.71	1.48	4.31	542.68	2.351	0.092857	316.54	416.29	1.32	0.92	1.89	99.75	1.259	0.257528	250.82	224.09	359.07	432.17	1248.06	1251.68	486.74	450.4	298.98	317.42	537.26	511.48
201106_at	GPX4: glutathione peroxidase 4 (phospholipid hydroperoxidase)	NM_002085	2879	g4504106	3985.38	4880.72	1.22	1.02	1.43	895.34	1.8	0.161684	3985.38	3739.25	-1.07	-0.91	-1.29	-246.13	-0.624	0.571541	3823.83	3818.59	4033.42	4265.68	5795.37	5644.02	3979.71	4103.76	2920.73	3265.2	4339.56	4431.49
201111_at	CSE1L: CSE1 chromosome segregation 1-like (yeast)	AF053641	1434	g3560556	2722.26	2457.21	-1.11	-0.97	-1.29	-265.05	-1.206	0.297275	2722.26	2938.35	1.08	0.97	1.19	216.09	1.241	0.276991	2908.84	2611.34	2786.82	2582.06	2845.63	2777.58	2056.3	2149.34	2668.99	2666.72	3199.61	3218.06
201112_s_at	CSE1L: CSE1 chromosome segregation 1-like (yeast)	NM_001316	1434	g4503072	6046.26	6377.97	1.05	0.82	1.29	331.71	0.391	0.721425	6046.26	5977.75	-1.01	-0.98	-1.04	-68.52	-0.673	0.527876	6045.02	5923.85	6212.04	6004.15	7928.46	7746.7	5056.41	4780.31	6074.01	6156.83	5860.18	5819.97
201113_at	TUFM: Tu translation elongation factor, mitochondrial	NM_003321	7284	g4507732	4179.44	3458.07	-1.21	-1.15	-1.27	-721.37	-6.988	0.002593	4179.44	4356.63	1.04	0.97	1.12	177.19	0.964	0.401155	4197.02	4273.37	4138.52	4108.85	3204.04	3416.79	3572.1	3639.36	4602.88	3821.04	4499.67	4502.93
201114_x_at	PSMA7: proteasome (prosome, macropain) subunit, alpha type, 7	NM_002792	5688	g4506188	8416.31	9066	1.08	0.99	1.16	649.69	1.497	0.219109	8416.31	8589.6	1.02	0.98	1.07	173.29	0.745	0.490937	8237.17	8203.58	8529.94	8694.56	9816.14	9761.9	8323.13	8362.85	8188.3	8337	8768.8	9064.31
201115_at	POLD2: polymerase (DNA directed), delta 2, regulatory subunit 50kDa	NM_006230	5425	g5453923	2611.38	2581.8	-1.01	-0.93	-1.1	-29.58	-0.214	0.838113	2611.38	3250.13	1.24	1.05	1.46	638.74	2.03	0.116511	2759.88	2816.36	2506.53	2362.75	2752.76	2714.64	2423.98	2435.81	4120.42	3117.16	2835.63	2927.3
201118_at	PGD: phosphogluconate dehydrogenase	NM_002631	5226	g4505758	1637.52	1297.03	-1.26	-1.15	-1.39	-340.5	-4.334	0.005637	1637.52	1472.67	-1.11	-0.89	-1.47	-164.86	-0.743	0.506999	1555.4	1775.38	1593.26	1626.05	1254.71	1152.21	1336.05	1445.14	950.5	1282.09	1818.23	1839.85
201119_s_at	COX8A: cytochrome c oxidase subunit 8A (ubiquitous)	NM_004074	1351	g4758043	6785.21	8061.19	1.19	1.1	1.28	1275.98	3.423	0.031203	6785.21	6921.94	1.02	0.98	1.06	136.73	0.793	0.458134	7105.69	6693.92	6568.25	6773	8794.82	8534.52	7554.38	7361.05	7089.85	7109.81	6555.19	6932.92
201120_s_at	PGRMC1: progesterone receptor membrane component 1	AL547946	10857	Hs.90061.0	770.3	807.11	1.05	0.54	1.56	36.81	0.155	0.886431	770.3	294.92	-2.61	-2.05	-3.58	-475.38	-8.678	0.000459	708.84	742.83	818.19	811.33	1292.56	1131.07	399.32	405.47	151.58	334.31	348.62	345.16
201121_s_at	PGRMC1: progesterone receptor membrane component 1	NM_006667	10857	g6857798	3586.93	3384.61	-1.06	-0.73	-1.87	-202.32	-0.224	0.836437	3586.93	1434.66	-2.5	-2.29	-2.72	-2152.27	-13.138	0.000481	3341.39	3289.72	3807.68	3908.95	4967.98	4882.78	1860.45	1827.24	1309.44	1473.49	1472.12	1483.59
201122_x_at	EIF5A: eukaryotic translation initiation factor 5A	BC000751	1984	g12653914	8258.51	7987.39	-1.03	-0.97	-1.11	-271.11	-0.795	0.481697	8258.51	8549.92	1.04	0.99	1.08	291.42	1.2	0.307519	8297.29	8364.63	8091.36	8280.75	8903.59	8066.98	7570.66	7408.34	8975.13	7990.4	8331.46	8902.69
201123_s_at	EIF5A: eukaryotic translation initiation factor 5A	NM_001970	1984	g4503544	9808.5	9720.73	-1.01	-0.93	-1.09	-87.77	-0.189	0.858811	9808.5	9089.04	-1.08	-0.91	-1.31	-719.45	-0.727	0.51613	9512.08	10028.2	9430.5	10263.2	10776.7	9928.97	8814.57	9362.68	6264.28	9387.91	10260	10444
201126_s_at	MGAT1: mannosyl (alpha-1,3-)-glycoprotein beta-1,2-N-acetylglucosaminyltransferase	NM_002406	4245	g6031182	307.6	350.38	1.14	0.87	1.42	42.78	0.851	0.448914	307.6	380.62	1.24	0.97	1.52	73.02	1.448	0.231001	338.99	319.19	298.21	274.02	465.36	394.92	274.47	266.76	481.41	248.51	402.7	389.87
201127_s_at	ACLY: ATP citrate lyase	AI971281	47	Hs.174140.0	1497.02	1442.57	-1.04	-0.99	-1.08	-54.45	-1.407	0.214492	1497.02	897.6	-1.67	-1.07	-3.71	-599.41	-1.984	0.139453	1420.19	1477.2	1521.99	1568.69	1506.68	1434.93	1405.79	1422.87	305.35	455.51	1443.89	1385.66
201128_s_at	ACLY: ATP citrate lyase	NM_001096	47	g4501864	5495.15	5016.73	-1.1	-1.04	-1.16	-478.42	-2.717	0.035468	5495.15	3431.14	-1.6	-1.05	-3.4	-2064.01	-1.862	0.15758	5352.92	5281.75	5796.88	5549.06	4985.23	4657.23	5159.32	5265.14	1268.42	1792.41	5307.88	5355.85
201129_at	SFRS7: splicing factor, arginine/serine-rich 7, 35kDa	NM_006276	6432	g6857827	1012.73	687.88	-1.47	-1.18	-1.93	-324.85	-3.077	0.03641	1012.73	1182.46	1.17	1.02	1.33	169.73	1.845	0.131975	961.03	936.53	1120.43	1032.94	860.18	852.02	516.38	522.95	1099.07	995.54	1354.31	1280.93
201132_at	HNRPH2: heterogeneous nuclear ribonucleoprotein H2 (H')	NM_019597	3188	g9624997	3374.13	3616.46	1.07	1	1.15	242.33	1.634	0.153437	3374.13	3443.05	1.02	0.95	1.1	68.92	0.436	0.678068	3695.09	3291.31	3261.22	3248.9	3518.47	3375.6	3801.99	3769.78	3153.2	3406.41	3712.79	3499.81
201133_s_at	PJA2: praja 2, RING-H2 motif containing	AA142966	9867	Hs.279849.0	956.53	1160.74	1.21	1.12	1.32	204.21	4.238	0.017069	956.53	1077.81	1.13	1.02	1.24	121.28	2.039	0.089496	1005.84	900.33	1059.7	860.25	1196	1140.4	1136.03	1170.53	1059.88	1065.39	1182.5	1003.48
201134_x_at	COX7C: cytochrome c oxidase subunit VIIc	NM_001867	1350	g4502992	11001.9	12395.8	1.13	1.07	1.18	1393.94	3.757	0.031969	11001.9	11518.5	1.05	1.01	1.08	516.69	2.35	0.096009	11078.7	10974.8	10919.3	11034.7	12883.5	13168.9	11706.2	11824.6	11067.6	11250.5	11752.1	12004
201135_at	ECHS1: enoyl Coenzyme A hydratase, short chain, 1, mitochondrial	NM_004092	1892	g12707569	1574	1868.36	1.19	1.14	1.23	294.36	7.66	0.000328	1574	1923.06	1.22	1.03	1.41	349.07	1.927	0.146433	1535.7	1529.6	1615.32	1615.36	1897.28	1938.52	1808.91	1828.74	1687.99	1545.13	2208.73	2250.4
201136_at	PLP2: proteolipid protein 2 (colonic epithelium-enriched)	NM_002668	5355	g4505892	741.81	1193.5	1.61	1.47	1.78	451.69	9.418	0.000154	741.81	1470.17	1.98	1.53	2.46	728.36	3.663	0.030849	636.88	727.95	789.64	812.77	1237.9	1118.13	1230.74	1187.23	1116.58	1150.47	1838.52	1775.11
201138_s_at	SSB: Sjogren syndrome antigen B (autoantigen La)	BG532929	6741	Hs.83715.0	4267.44	4257.95	-1	-0.92	-1.1	-9.49	-0.043	0.968247	4267.44	4009.06	-1.06	-0.91	-1.28	-258.39	-0.639	0.567999	4309.9	4219.24	4299.13	4241.51	4609.56	4638.57	3752.75	4030.93	4393.82	4947.26	3509.85	3185.29
201139_s_at	SSB: Sjogren syndrome antigen B (autoantigen La)	NM_003142	6741	g10835066	4051.87	3911.86	-1.04	-0.97	-1.12	-140.02	-0.821	0.469934	4051.87	3711.18	-1.09	-0.94	-1.31	-340.7	-0.921	0.42458	4013.37	4115.83	4050.94	4027.36	4018.89	4293.55	3485.38	3849.61	4118.94	4540.67	3184	3001.1
201140_s_at	RAB5C: RAB5C, member RAS oncogene family	NM_004583	5878	g4759019	508.74	372.16	-1.37	-1.06	-1.92	-136.58	-2.09	0.126496	508.74	571.57	1.12	0.82	1.43	62.82	0.674	0.548088	503.04	506.43	500.52	524.98	276.46	243.74	476.63	491.83	794.8	342.7	602.22	546.55
201141_at	GPNMB: glycoprotein (transmembrane) nmb	NM_002510	10457	g4505404	124.25	198.67	1.6	0.71	2.52	74.42	1.11	0.346021	124.25	155.61	1.25	1.07	1.46	31.36	2.333	0.063801	132.07	102.38	136.77	125.79	77.61	89.42	321.24	306.4	138.31	186.23	157.41	140.48
201142_at	EIF2S1: eukaryotic translation initiation factor 2, subunit 1 alpha, 35kDa	AA577698	1965	Hs.151777.0	2351.4	1962.23	-1.2	-1.1	-1.3	-389.17	-3.39	0.02889	2351.4	2179.14	-1.08	-0.77	-1.76	-172.26	-0.332	0.760076	2650.84	2229.26	2355.74	2169.76	1928.67	2038.69	2020.48	1861.08	3179.02	2928.72	1329.73	1279.09
201143_s_at	EIF2S1: eukaryotic translation initiation factor 2, subunit 1 alpha, 35kDa	BC002513	1965	g12803384	736.74	626.98	-1.18	-1.11	-1.24	-109.77	-4.401	0.009334	736.74	664.02	-1.11	-0.82	-1.72	-72.72	-0.506	0.646399	692.03	797.91	735.24	721.8	600.88	655.18	629.06	622.79	913.19	906.68	405.18	431.04
201144_s_at	EIF2S1: eukaryotic translation initiation factor 2, subunit 1 alpha, 35kDa	NM_004094	1965	g4758255	3829.26	3782.46	-1.01	-0.94	-1.09	-46.8	-0.276	0.796709	3829.26	3225	-1.19	-1.04	-1.38	-604.26	-2.214	0.104716	3717.07	3761.26	4002.39	3836.31	3556.77	3529.79	3835.37	4207.92	3677.19	3689.34	2824	2709.47
201145_at	HAX1: HCLS1 associated protein X-1	NM_006118	10456	g13435355	3435.86	3646.41	1.06	0.97	1.16	210.55	1.133	0.300369	3435.86	3690.41	1.07	0.96	1.2	254.55	1.029	0.350603	3716.01	3585.92	3156.05	3285.45	3460.36	3376.2	3857.58	3891.51	3191.96	3491.22	4024.17	4054.27
201146_at	NFE2L2: nuclear factor (erythroid-derived 2)-like 2	NM_006164	4780	g5453775	3405.44	3502.03	1.03	0.93	1.13	96.59	0.454	0.675564	3405.44	3391.51	-1	-0.78	-1.39	-13.93	-0.024	0.982276	3520.92	3511.59	3268.92	3320.32	3871.37	3825.23	3230.95	3080.58	2076.63	2777.07	4396.54	4315.78
201149_s_at	TIMP3: TIMP metallopeptidase inhibitor 3 (Sorsby fundus dystrophy, pseudoinflammatory)	U67195	7078	g1519557	15.48	16.37	1.06	0.74	1.56	0.89	0.253	0.808578	15.48	12.38	-1.25	-0.82	-1.94	-3.09	-0.877	0.414768	15.95	17.35	20.6	8.01	21.76	13.96	18.37	11.4	18.51	8.56	13.33	9.14
201151_s_at	MBNL1: muscleblind-like (Drosophila)	BF512200	4154	Hs.28578.0	897.81	879.53	-1.02	-0.59	-1.59	-18.28	-0.072	0.944997	897.81	780.95	-1.15	-0.66	-1.88	-116.85	-0.454	0.667875	596.55	470.99	1320.31	1203.37	619	676.59	1142.93	1079.59	348.88	927.2	947.09	900.66
201152_s_at	MBNL1: muscleblind-like (Drosophila)	N31913	4154	Hs.28578.0	4587.4	4851.03	1.06	0.82	1.39	263.63	0.355	0.735512	4587.4	4896.68	1.07	0.86	1.38	309.28	0.472	0.659476	3762.62	3398.52	5538.46	5650.01	4177.53	3954.99	5687.52	5584.09	4120.97	4768.15	5318.22	5379.39
201153_s_at	MBNL1: muscleblind-like (Drosophila)	NM_021038	4154	g10518339	4246.41	4219.91	-1.01	-0.75	-1.33	-26.49	-0.037	0.972097	4246.41	4665.28	1.1	0.9	1.41	418.87	0.722	0.518474	3278.47	3264.63	5403.35	5039.18	3455.33	3422.64	5029.59	4972.1	4336.1	4651.29	4831.38	4842.33
201154_x_at	RPL4: ribosomal protein L4	NM_000968	6124	g4506652	16381.6	15446.4	-1.06	-1	-1.12	-935.27	-1.749	0.157804	16381.6	17032.6	1.04	1.01	1.07	650.97	2.252	0.065951	16615.5	16647	15825.5	16438.6	14641.5	14523.1	16307.8	16313.1	16411	17058.1	17336	17325.3
201155_s_at	MFN2: mitofusin 2	NM_014874	9927	g7662003	765.14	850.17	1.11	0.96	1.26	85.03	1.207	0.311932	765.14	891.34	1.16	1.07	1.27	126.2	2.723	0.067927	760.1	783.83	746.68	769.94	752.27	710.54	996.34	941.53	789.25	840.46	980.47	955.18
201156_s_at	RAB5C: RAB5C, member RAS oncogene family	AF141304	5878	Hs.479.0	468.56	363.9	-1.29	-1.07	-1.61	-104.66	-2.303	0.09646	468.56	406.36	-1.15	-1.04	-1.28	-62.2	-2.404	0.073297	454.06	494.41	450.96	474.8	287.99	286.31	441.47	439.83	419.02	336.33	428.06	442.02
201157_s_at	NMT1: N-myristoyltransferase 1	AF020500	4836	Hs.111039.0	956.81	846.49	-1.13	-0.86	-1.56	-110.32	-0.705	0.511508	956.81	881.83	-1.09	-0.92	-1.25	-74.98	-0.855	0.446449	818.5	805.83	1122.23	1080.69	631.04	605.73	1088.43	1060.76	904.65	809.67	889.23	923.8
201158_at	NMT1: N-myristoyltransferase 1	AI570834	4836	Hs.111039.0	1209.44	1294.72	1.07	0.92	1.26	85.28	0.722	0.500305	1209.44	1766.41	1.46	1.29	1.68	556.97	5.6	0.007877	1090.22	1001.52	1372.19	1373.83	1167.53	1198.49	1461.82	1351.03	1823.66	1778.47	1700.84	1762.67
201159_s_at	NMT1: N-myristoyltransferase 1	NM_021079	4836	g10835072	61.03	76.73	1.26	1.03	1.57	15.69	1.881	0.112878	61.03	105.39	1.73	1.43	2.14	44.36	5.181	0.002355	43.99	57.38	68.49	74.28	89.62	75.44	65.2	76.64	98.29	102.28	121.28	99.71
201160_s_at	CSDA: cold shock domain protein A	AL556190	8531	Hs.1139.0	8468.32	9577.92	1.13	1.05	1.21	1109.6	2.881	0.028063	8468.32	7907.7	-1.07	-1	-1.15	-560.62	-1.646	0.155967	8966.85	8913.26	7876.04	8117.13	9962.4	10100.5	9240.87	9007.86	8130.64	8350.58	7617.42	7532.16
201161_s_at	CSDA: cold shock domain protein A	NM_003651	8531	g4503070	5239.59	6549.93	1.25	1.05	1.48	1310.34	2.134	0.078639	5239.59	4504.76	-1.16	-1.01	-1.32	-734.83	-1.783	0.153624	6057.37	5746.8	4592.89	4561.3	7677.08	6999.1	5809.64	5713.89	4330.92	4919.62	4347.5	4421.01
201164_s_at	PUM1: pumilio homolog 1 (Drosophila)	BG474429	9698	Hs.153834.0	1559.06	1710.62	1.1	1	1.2	151.56	1.637	0.186184	1559.06	1705	1.09	1.05	1.14	145.94	3.475	0.013977	1599.88	1480.38	1574.46	1581.5	1843.35	1880.23	1592.82	1526.06	1622.21	1745.35	1686.32	1766.12
201165_s_at	PUM1: pumilio homolog 1 (Drosophila)	BE670915	9698	Hs.153834.0	3044.6	3132.01	1.03	0.97	1.09	87.42	0.843	0.443265	3044.6	2953.51	-1.03	-0.91	-1.18	-91.09	-0.396	0.717078	3033.84	2926.55	3140.52	3077.48	3333.3	3234.23	3042.02	2918.5	2284.03	3268.87	3160.11	3101.01
201166_s_at	PUM1: pumilio homolog 1 (Drosophila)	NM_014676	9698	g13491165	3971.08	4045.17	1.02	0.97	1.07	74.1	0.628	0.553436	3971.08	3987.71	1	0.95	1.06	16.64	0.13	0.900923	4192.83	3943.88	3923.5	3824.09	4098.59	4264.07	3961.14	3856.9	3789.88	4269.63	3947.56	3943.77
201167_x_at	ARHGDIA: Rho GDP dissociation inhibitor (GDI) alpha	D13989	396	g285978	253.15	142.75	-1.77	-1.7	-1.85	-110.4	-26.339	0	253.15	188.48	-1.34	-1.24	-1.46	-64.67	-6.709	0.003814	260.05	246.51	254.77	251.27	137.9	145.68	137.41	149.99	191.52	184.8	211.09	166.5
201168_x_at	ARHGDIA /// LOC728908: Rho GDP dissociation inhibitor (GDI) alpha /// similar to Rho GDP dissociation inhibitor (GDI) alpha	NM_004309	396 /// 728908	g4757767	1376.01	847.43	-1.62	-1.48	-1.79	-528.58	-9.007	0.000105	1376.01	1712.45	1.24	0.93	1.57	336.44	1.26	0.292977	1325.43	1284.39	1451.22	1443.01	951.6	768.46	872.41	797.26	2472.09	1311.7	1405.01	1660.98
201170_s_at	BHLHB2: basic helix-loop-helix domain containing, class B, 2	NM_003670	8553	g4503298	450.54	107.15	-4.2	-3.25	-5.38	-343.39	-6.522	0.005695	450.54	207.83	-2.17	-1.5	-3.44	-242.71	-3.57	0.012246	566.91	494.94	411.9	328.4	138.05	90.27	99.94	100.34	280.08	272.8	187.68	90.77
201171_at	ATP6V0E1: ATPase, H+ transporting, lysosomal 9kDa, V0 subunit e1	NM_003945	8992	Hs.24322.0	128.94	204.55	1.59	1.36	1.89	75.62	5.186	0.002457	128.94	115.51	-1.12	-0.77	-1.85	-13.43	-0.455	0.672617	109.55	109.83	155.77	140.6	179.06	216.49	205.4	217.25	38.19	117.03	150.37	156.43
201172_x_at	ATP6V0E1: ATPase, H+ transporting, lysosomal 9kDa, V0 subunit e1	NM_003945	8992	g4502318	2189.8	3369.87	1.54	1.37	1.75	1180.07	7.177	0.003461	2189.8	2414.66	1.1	0.89	1.34	224.86	0.788	0.464996	1903.99	1931.49	2409.63	2514.09	3306.69	3402.75	3477.18	3292.85	1824.01	2236.82	2799.59	2798.21
201173_x_at	NUDC: nuclear distribution gene C homolog (A. nidulans)	NM_006600	10726	g5729952	4704.55	4372.9	-1.08	-1.02	-1.14	-331.65	-2.17	0.108851	4704.55	4084.38	-1.15	-1.07	-1.25	-620.17	-3.082	0.049569	4647.1	4684.42	4810.78	4675.89	4090.54	4183.12	4472.45	4745.5	3552.56	4016.34	4348.62	4419.99
201174_s_at	TERF2IP: telomeric repeat binding factor 2, interacting protein	NM_018975	54386	g9507032	4186.45	3910.81	-1.07	-0.97	-1.19	-275.64	-1.137	0.335181	4186.45	3856.24	-1.09	-0.98	-1.21	-330.21	-1.361	0.263273	4218.04	4249.63	4190.31	4087.81	4343.36	4302.84	3427.42	3569.62	4381.41	4144.54	3419.24	3479.75
201175_at	TXNDC14: thioredoxin domain containing 14	NM_015959	51075	g7705725	2694.33	2211.64	-1.22	-1.06	-1.43	-482.69	-2.321	0.075562	2694.33	2578.44	-1.04	-0.97	-1.12	-115.89	-1.004	0.356523	2639.38	2634.97	2960.47	2542.51	2678.53	1979.75	2338.06	1850.23	2774.14	2492.91	2461.13	2585.6
201176_s_at	ARCN1: archain 1	NM_001655	372	g11863153	2593.25	2078.85	-1.25	-1.02	-1.61	-514.4	-1.808	0.167184	2593.25	2539.59	-1.02	-0.91	-1.16	-53.67	-0.299	0.783935	2650.21	2549.1	2603.48	2570.22	2540.49	2598.7	1599.28	1576.92	2280.72	2187.53	2804.76	2885.34
201177_s_at	UBA2: ubiquitin-like modifier activating enzyme 2	NM_005499	10054	g4885648	5146.04	5453.26	1.06	0.98	1.15	307.22	1.21	0.287634	5146.04	5766.38	1.12	1.03	1.23	620.34	2.179	0.075731	5236.75	4477.69	5418.2	5451.51	5226.52	5340.2	5500.79	5745.54	5484.06	5456.82	6058.2	6066.44
201178_at	FBXO7: F-box protein 7	NM_012179	25793	g7106310	1637.79	2019.9	1.23	1.18	1.28	382.11	8.16	0.000411	1637.79	1974.13	1.21	1.13	1.28	336.34	4.559	0.011819	1682.9	1676.37	1612.95	1578.93	2069.34	2019.99	2081.84	1908.43	2088.04	1778.15	1976.74	2053.6
201179_s_at	GNAI3: guanine nucleotide binding protein (G protein), alpha inhibiting activity polypeptide 3	J03005	2773	g183183	1274.11	1602.87	1.26	1.2	1.32	328.76	7.655	0.002424	1274.11	1166.23	-1.09	-0.98	-1.24	-107.88	-1.268	0.29076	1311.03	1254.93	1271.45	1259.03	1701.1	1638.78	1524.94	1546.68	1010.85	1395.1	1182.86	1076.12
201180_s_at	GNAI3: guanine nucleotide binding protein (G protein), alpha inhibiting activity polypeptide 3	J03198	2773	g183224	3443.77	4381.68	1.27	1.22	1.33	937.91	8.285	0.000508	3443.77	3826.45	1.11	1.02	1.2	382.68	2.001	0.124383	3465.96	3583.92	3413.3	3311.91	4595.62	4496.21	4252.74	4182.15	4247.56	4015.99	3503.67	3538.57
201181_at	GNAI3: guanine nucleotide binding protein (G protein), alpha inhibiting activity polypeptide 3	NM_006496	2773	g5729849	325.45	303.64	-1.07	-1	-1.16	-21.81	-1.547	0.201963	325.45	329.24	1.01	0.97	1.05	3.79	0.479	0.650307	327.52	315.99	337.47	320.8	331.04	321.83	279.42	282.25	317.72	347.18	328.99	323.08
201182_s_at	CHD4: chromodomain helicase DNA binding protein 4	AI761771	1108	Hs.74441.0	1666.64	1871.15	1.12	1.02	1.23	204.51	1.989	0.129408	1666.64	1785.15	1.07	0.96	1.18	118.52	1.051	0.36292	1651.58	1624.1	1744.15	1646.72	1859.82	1692.89	2151.14	1780.75	1485.56	1758.61	1934.19	1962.26
201183_s_at	CHD4: chromodomain helicase DNA binding protein 4	AI613273	1108	Hs.74441.0	3003.82	3490.65	1.16	1.08	1.25	486.84	3.333	0.020709	3003.82	3260.75	1.09	0.97	1.21	256.94	1.192	0.301571	3086.83	2778.67	3035.29	3114.47	3361.17	3204.43	3707.27	3689.75	2763.54	3104.69	3619.89	3554.89
201184_s_at	CHD4: chromodomain helicase DNA binding protein 4	NM_001273	1108	g4557452	3329.71	3670.36	1.1	1	1.21	340.65	1.569	0.205421	3329.71	3612.91	1.09	1	1.18	283.21	1.578	0.199347	3282.25	3225.61	3351.12	3459.85	3334.74	3294.73	4145.25	3906.7	3419.59	3281.83	3686.29	4063.95
201186_at	LRPAP1: low density lipoprotein receptor-related protein associated protein 1	NM_002337	4043	g4505020	974.22	1236.41	1.27	1.21	1.33	262.2	8.089	0.001241	974.22	1109.66	1.14	0.98	1.3	135.44	1.419	0.248008	985.03	1004.34	950.62	956.88	1182.5	1186.85	1286.27	1290.04	941.95	955.87	1225.86	1314.95
201188_s_at	ITPR3: inositol 1,4,5-triphosphate receptor, type 3	D26351	3710	g450470	87.72	86.33	-1.02	-0.88	-1.19	-1.39	-0.172	0.870255	87.72	98.08	1.12	0.94	1.31	10.36	1.066	0.343204	85.32	77.17	93.01	95.39	85.04	74.69	79.46	106.14	89.59	83.53	123.41	95.81
201189_s_at	ITPR3: inositol 1,4,5-triphosphate receptor, type 3	NM_002224	3710	g4504794	427.1	429.05	1	0.95	1.06	1.95	0.141	0.892768	427.1	477.39	1.12	1.07	1.17	50.29	4.06	0.0071	443.78	399.74	433.11	431.76	451.69	414.21	410.05	440.24	485.94	453.59	484.34	485.68
201190_s_at	PITPNA: phosphatidylinositol transfer protein, alpha	H15647	5306	Hs.79709.0	2335.62	2867.54	1.23	0.97	1.49	531.92	1.427	0.244783	2335.62	2961.6	1.27	1.06	1.48	625.98	2.138	0.115284	2444.53	2424.87	2254.6	2218.46	3472.18	3537.66	2231.2	2229.11	2494.53	2435.83	3480.79	3435.23
201191_at	PITPNA: phosphatidylinositol transfer protein, alpha	H15647	5306	Hs.79709.0	711.82	895.02	1.26	0.93	1.59	183.2	1.292	0.283843	711.82	900.86	1.27	1.06	1.48	189.03	2.135	0.113909	763.56	667.73	704.05	711.96	1181.98	1089.78	667.5	640.81	766.5	738.07	1068.55	1030.31
201192_s_at	PITPNA: phosphatidylinositol transfer protein, alpha	NM_006224	5306	g5453907	748.37	823.18	1.1	1.03	1.17	74.81	2.511	0.047683	748.37	725.79	-1.03	-0.95	-1.13	-22.58	-0.575	0.592212	804.01	733.06	731.49	724.94	818.85	856.31	858.56	759.02	765.33	800.67	650.85	686.31
201193_at	IDH1: isocitrate dehydrogenase 1 (NADP+), soluble	NM_005896	3417	g5174470	1838.36	2390.41	1.3	0.99	1.63	552.05	1.615	0.191687	1838.36	2261.66	1.23	1.11	1.37	423.3	3.355	0.015787	2055.39	1931.74	1733.04	1633.27	2965.05	2952.43	1851.24	1792.9	2195	2059.3	2380.87	2411.46
201194_at	SEPW1: selenoprotein W, 1	NM_003009	6415	g4506886	2818.01	3598.63	1.28	1.04	1.65	780.62	2.017	0.133704	2818.01	3345.26	1.19	0.97	1.53	527.25	1.364	0.263217	3345.38	3599.69	2068.46	2258.52	3600.7	3657.52	3448.96	3687.33	3251.81	3283.36	3371.62	3474.24
201195_s_at	SLC7A5: solute carrier family 7 (cationic amino acid transporter, y+ system), member 5	AB018009	8140	g5926731	5052.67	4828.09	-1.05	-0.99	-1.11	-224.58	-1.267	0.269571	5052.67	6284.9	1.24	1.15	1.34	1232.23	4.341	0.016729	5142.65	5130.4	4825.08	5112.55	5151.64	4862.14	4911.72	4386.88	6997.54	6214.13	5665.26	6262.67
201196_s_at	AMD1: adenosylmethionine decarboxylase 1	M21154	262	g178517	1372.2	1010.21	-1.36	-1.1	-1.75	-362	-2.522	0.069344	1372.2	1239.05	-1.11	-0.9	-1.43	-133.15	-0.763	0.493779	1476.24	1421.73	1333.28	1257.57	770.25	781.88	1240.14	1248.56	1489.9	1566.65	956.89	942.76
201197_at	AMD1: adenosylmethionine decarboxylase 1	NM_001634	262	g5209326	4485.56	3586.95	-1.25	-1.16	-1.36	-898.61	-4.822	0.00387	4485.56	3941.59	-1.14	-1.09	-1.18	-543.97	-4.896	0.012568	4759.98	4335.48	4554.59	4292.18	3914.31	3776.5	3332.31	3324.68	3921.37	4018.56	3903.96	3922.47
201198_s_at	PSMD1: proteasome (prosome, macropain) 26S subunit, non-ATPase, 1	AI860431	5707	Hs.3887.0	3436.64	3446.72	1	0.94	1.06	10.08	0.08	0.939665	3436.64	3244.39	-1.06	-1.02	-1.1	-192.25	-2.624	0.042237	3441.49	3327.62	3379.53	3597.92	3681.74	3403.87	3542.9	3158.37	3200.38	3188.63	3213.1	3375.48
201199_s_at	PSMD1: proteasome (prosome, macropain) 26S subunit, non-ATPase, 1	NM_002807	5707	g4506224	4379.85	4624.67	1.06	1.01	1.1	244.82	2.134	0.092264	4379.85	4402.16	1.01	0.97	1.04	22.31	0.267	0.798647	4328.79	4264.77	4505.19	4420.64	4804.72	4759.83	4356.56	4577.58	4485.43	4234.91	4366.59	4521.71
201200_at	CREG1: cellular repressor of E1A-stimulated genes 1	NM_003851	8804	g4503036	1959.23	2533.89	1.29	0.98	1.72	574.66	1.522	0.180023	1959.23	2424.34	1.24	1.02	1.57	465.11	1.801	0.151824	2154.99	1236.35	2311.35	2134.22	2018.41	2061.54	2934.2	3121.42	2327.76	2632.32	2482.96	2254.3
201201_at	CSTB: cystatin B (stefin B)	NM_000100	1476	g4503116	4032.36	4432.73	1.1	1.03	1.17	400.37	2.3	0.070333	4032.36	3699.71	-1.09	-0.93	-1.31	-332.65	-0.874	0.440356	3905.37	3862.1	4115.17	4246.8	4176.5	4173.63	4682.95	4697.83	2826.74	3353.47	4217.71	4400.93
201202_at	PCNA: proliferating cell nuclear antigen	NM_002592	5111	g4505640	8085.65	7785.87	-1.04	-1	-1.07	-299.78	-1.849	0.116499	8085.65	8530.63	1.06	1.01	1.1	444.98	2.227	0.069171	8021.93	7756.38	8327.33	8236.96	7537.2	7931.24	7708.42	7966.61	8262.35	8924.37	8626.75	8309.05
201204_s_at	RRBP1: ribosome binding protein 1 homolog 180kDa (dog)	AA706065	6238	Hs.98614.0	332.43	369.01	1.11	0.99	1.24	36.58	1.455	0.206803	332.43	415.98	1.25	1.09	1.42	83.55	2.569	0.060985	318.8	303.02	354.76	353.16	315.82	353.87	413.49	392.86	401.88	338.34	450.08	473.64
201205_at	Hs.98614.0	AF006751		Hs.98614.0	85.53	87.46	1.02	0.88	1.17	1.93	0.259	0.806977	85.53	92.97	1.09	0.87	1.31	7.43	0.65	0.554669	93.04	89.34	77.18	82.58	83.81	90.06	72.26	103.71	111.55	64.56	108.36	87.39
201206_s_at	RRBP1: ribosome binding protein 1 homolog 180kDa (dog)	NM_004587	6238	g4759055	407.94	515.78	1.26	1.13	1.44	107.85	3.48	0.023036	407.94	397.02	-1.03	-0.82	-1.33	-10.92	-0.19	0.857029	349.02	375.38	473.08	434.27	506.12	547.34	485.79	523.9	325.6	296.41	480.15	485.92
201207_at	TNFAIP1: tumor necrosis factor, alpha-induced protein 1 (endothelial)	NM_021137	7126	g10863936	260.2	318.32	1.22	0.85	1.62	58.12	0.978	0.392922	260.2	317.92	1.22	0.75	1.71	57.72	0.767	0.495366	255.96	223.28	292.3	269.27	433.58	400.77	231.07	207.87	193.03	187.37	456.17	435.11
201209_at	HDAC1: histone deacetylase 1	NM_004964	3065	g13128859	7221.49	7862.79	1.09	1.03	1.15	641.3	2.41	0.089383	7221.49	7745.24	1.07	1.03	1.12	523.75	2.525	0.076964	7111.01	7168.23	7318.33	7288.37	8283.38	8305.86	7237.57	7624.34	7528.54	7299.59	8182.49	7970.33
201210_at	DDX3X: DEAD (Asp-Glu-Ala-Asp) box polypeptide 3, X-linked	NM_001356	1654	g13514812	6420.98	6482.66	1.01	0.98	1.04	61.68	0.599	0.590965	6420.98	6725.06	1.05	1.01	1.08	304.08	2.226	0.111428	6399.06	6439.04	6436.43	6409.38	6497	6243.49	6447.44	6742.71	7075.36	6557.73	6799.7	6467.43
201211_s_at	DDX3X: DEAD (Asp-Glu-Ala-Asp) box polypeptide 3, X-linked	AF061337	1654	g3523149	163.65	192.9	1.18	0.88	1.55	29.24	0.961	0.378489	163.65	146.95	-1.11	-0.85	-1.49	-16.7	-0.643	0.54417	201.78	124.78	180.83	147.23	175	131.16	244.69	220.73	97.18	173.23	182.31	135.09
201212_at	LGMN: legumain	D55696	5641	g1890049	548.17	412.42	-1.33	-0.86	-2.88	-135.75	-0.99	0.390765	548.17	339.16	-1.62	-1.38	-1.92	-209.01	-5.309	0.002017	580.32	530.88	596.07	485.4	650.92	640.56	187.83	170.35	285.38	328.22	425.94	317.1
201213_at	Hs.36587.0	AI090331		Hs.36587.0	168.25	222.67	1.32	1.19	1.47	54.41	4.058	0.010955	168.25	183.39	1.09	0.95	1.24	15.14	1.066	0.340189	175.54	169.65	178.5	149.33	195.08	212.21	236.96	246.42	147.4	184.84	202.84	198.48
201214_s_at	PPP1R7: protein phosphatase 1, regulatory (inhibitor) subunit 7	NM_002712	5510	g4506012	1440.75	1691.07	1.17	1.12	1.22	250.32	5.696	0.010259	1440.75	1350.61	-1.07	-1.05	-1.09	-90.14	-6.272	0.005125	1451.59	1439.31	1439.67	1432.44	1773.44	1751.16	1654.8	1584.9	1334.32	1341.72	1334.67	1391.72
201216_at	ERP29: endoplasmic reticulum protein 29	NM_006817	10961	g13124889	1693.77	1616.13	-1.05	-0.89	-1.27	-77.63	-0.447	0.683454	1693.77	1880.47	1.11	1	1.23	186.71	1.575	0.201371	1721.73	1756.89	1608.86	1687.59	1301.8	1341.25	1944.09	1877.39	1595.21	1814.8	1987.4	2124.49
201217_x_at	RPL3: ribosomal protein L3	NM_000967	6122	g4506648	15596.9	14329.4	-1.09	-0.99	-1.21	-1267.44	-1.412	0.229269	15596.9	16355.6	1.05	1	1.11	758.79	1.489	0.187116	16162.4	16266.4	14995.6	14963	12761.2	13067	15940.5	15549	15560.9	15964.4	17169.4	16727.9
201218_at	CTBP2: C-terminal binding protein 2	N23018	1488	Hs.171391.0	44.15	32.39	-1.36	-0.96	-2.24	-11.75	-1.429	0.225841	44.15	33.2	-1.33	-1.05	-1.75	-10.95	-1.999	0.097571	47.97	50.14	42.64	35.84	49.68	40.58	19.43	19.88	31.23	22.26	43.63	35.67
201219_at	CTBP2: C-terminal binding protein 2	AW269836	1488	Hs.171391.0	52.1	40.95	-1.27	-0.9	-2.06	-11.15	-1.09	0.334783	52.1	50.51	-1.03	-0.79	-1.41	-1.59	-0.181	0.86438	61.19	57.07	46.43	43.69	46.55	64.15	32.03	21.05	34.66	43.03	70.49	53.85
201220_x_at	CTBP2: C-terminal binding protein 2	NM_001329	1488	g4557498	93.44	90.39	-1.03	-0.87	-1.28	-3.05	-0.289	0.791417	93.44	80.32	-1.16	-1.13	-1.2	-13.12	-8.133	0.001579	92.92	95.05	92.57	93.22	104.69	110.96	65.94	79.97	82.84	76.79	82.85	78.79
201221_s_at	SNRP70: small nuclear ribonucleoprotein 70kDa polypeptide (RNP antigen)	NM_003089	6625	g4507118	3383.01	3116.73	-1.09	-1.05	-1.12	-266.28	-3.929	0.009228	3383.01	3438.61	1.02	0.98	1.06	55.6	0.681	0.521793	3368.76	3238.62	3427.89	3496.76	3189.06	3049.88	3182.56	3045.42	3548.43	3533.11	3302.97	3369.93
201222_s_at	RAD23B: RAD23 homolog B (S. cerevisiae)	AL527365	5887	Hs.178658.0	4824.12	4126.25	-1.17	-0.99	-1.41	-697.87	-1.563	0.200077	4824.12	3897.27	-1.24	-1.06	-1.48	-926.86	-2.297	0.086738	4427.64	4962.88	5062.43	4843.54	4659.34	5008.75	3200.35	3636.56	2909.85	3838.14	4108.47	4732.6
201223_s_at	RAD23B: RAD23 homolog B (S. cerevisiae)	NM_002874	5887	g4506386	2531.9	2187.71	-1.16	-0.98	-1.39	-344.19	-1.445	0.210472	2531.9	2460.09	-1.03	-0.89	-1.2	-71.81	-0.328	0.756181	2647.01	2175.37	2664.23	2641	2546.18	2543.4	1808.08	1853.2	2102.35	2185.68	2820.3	2732.03
201224_s_at	SRRM1: serine/arginine repetitive matrix 1	AU147713	10250	Hs.18192.0	1490.49	1490.26	-1	-0.93	-1.08	-0.23	-0.003	0.997465	1490.49	1581.41	1.06	0.98	1.15	90.91	1.179	0.317229	1500.94	1499.86	1515.92	1445.24	1492.52	1314.87	1625.69	1527.98	1694.68	1382.88	1544.89	1703.18
201225_s_at	SRRM1: serine/arginine repetitive matrix 1	NM_005839	10250	g5032118	4216.06	3934.29	-1.07	-1	-1.15	-281.77	-1.569	0.171969	4216.06	4305.99	1.02	0.95	1.09	89.93	0.509	0.629889	4479.23	4219.43	4209.48	3956.11	3893.66	3541.75	4169.69	4132.08	4478.15	3885.87	4437.83	4422.1
201226_at	NDUFB8: NADH dehydrogenase (ubiquinone) 1 beta subcomplex, 8, 19kDa	NM_005004	4714	g4826853	4030.92	4526.43	1.12	1.03	1.22	495.51	2.198	0.082974	4030.92	3215.63	-1.25	-1	-1.67	-815.29	-1.654	0.188175	4197.17	4171.63	3721.7	4033.18	4881.35	4854.41	4183.13	4186.82	2096.98	2730.46	4023.92	4011.16
201227_s_at	NDUFB8: NADH dehydrogenase (ubiquinone) 1 beta subcomplex, 8, 19kDa	NM_005004	4714	g4826853	5238.24	5641.5	1.08	0.99	1.16	403.27	1.516	0.213569	5238.24	4463.52	-1.17	-0.99	-1.43	-774.72	-1.586	0.206769	5349.97	5288.58	5297.21	5017.19	5969.73	6183.76	5187.95	5224.57	3480.9	3804.63	5128.17	5440.38
201228_s_at	ARIH2: ariadne homolog 2 (Drosophila)	AW074830	10425	Hs.241558.0	302.41	337.16	1.11	0.84	1.5	34.76	0.641	0.545582	302.41	299.6	-1.01	-0.74	-1.37	-2.8	-0.051	0.960983	265.33	206.28	357.86	380.16	259.84	294.35	381.03	413.43	225.41	247.11	352.97	372.93
201229_s_at	ARIH2: ariadne homolog 2 (Drosophila)	BC000422	10425	g12653306	1007.05	1077.9	1.07	0.92	1.26	70.84	0.716	0.500804	1007.05	935.63	-1.08	-0.9	-1.29	-71.42	-0.673	0.52619	810.68	985.08	1099.98	1132.47	959.9	973.43	1142.53	1235.73	753.46	867.05	1025.92	1096.1
201230_s_at	ARIH2: ariadne homolog 2 (Drosophila)	NM_006321	10425	g5453556	1147.78	1133.89	-1.01	-0.84	-1.26	-13.89	-0.102	0.924022	1147.78	1282.58	1.12	1	1.25	134.8	1.586	0.177012	1263.85	1073.39	1148.55	1105.35	1365.72	1350.21	912.75	906.88	1148.66	1159.96	1408.62	1413.08
201231_s_at	ENO1: enolase 1, (alpha)	NM_001428	2023	g4503570	12796.5	11542.1	-1.11	-1.07	-1.15	-1254.4	-4.639	0.004615	12796.5	12478.9	-1.03	-0.99	-1.06	-317.59	-1.37	0.220197	12863.3	12398.9	12765.8	13158	11820.4	12004.4	11265.8	11077.7	12688.6	11975.8	12699.3	12551.9
201232_s_at	PSMD13: proteasome (prosome, macropain) 26S subunit, non-ATPase, 13	NM_002817	5719	g4506222	3952.24	3796.95	-1.04	-1	-1.08	-155.28	-1.674	0.150478	3952.24	3133.89	-1.26	-1.21	-1.32	-818.35	-8.828	0.000203	3867.7	3851.13	4035.32	4054.8	3836.96	3960.23	3794.29	3596.35	3057.9	2963.8	3215.98	3297.86
201233_at	PSMD13: proteasome (prosome, macropain) 26S subunit, non-ATPase, 13	NM_002817	5719	g4506222	1605.5	1543.33	-1.04	-0.96	-1.14	-62.18	-0.758	0.493374	1605.5	1149.93	-1.4	-1.19	-1.68	-455.58	-3.763	0.027579	1606.35	1635.92	1529.16	1650.58	1682.17	1670.29	1386.53	1434.31	825.8	1127.55	1296.01	1350.34
201234_at	ILK: integrin-linked kinase	NM_004517	3611	g4758605	363.66	256.02	-1.42	-1.33	-1.52	-107.64	-8.153	0.000369	363.66	397.58	1.09	0.9	1.29	33.91	0.786	0.48263	361.24	355.26	343.42	394.74	262.96	264.91	262.03	234.2	522.63	352.49	358.44	356.74
201235_s_at	BTG2: BTG family, member 2	BG339064	7832	Hs.75462.0	31.42	45.71	1.45	1.13	1.9	14.29	2.438	0.05141	31.42	37.07	1.18	0.88	1.57	5.65	0.955	0.377467	25.76	42.67	27.52	29.75	33.62	50.71	53.67	44.85	28.14	44.71	30.49	44.95
201236_s_at	BTG2: BTG family, member 2	NM_006763	7832	g5802987	202.28	250.71	1.24	1.15	1.33	48.44	4.275	0.016009	202.28	313.73	1.55	1.35	1.76	111.45	4.504	0.018784	211.51	203.03	199.37	195.2	232.14	245.97	242.92	281.82	381.87	300.61	265.32	307.11
201237_at	CAPZA2: capping protein (actin filament) muscle Z-line, alpha 2	AV685920	830	Hs.75546.0	1874.16	2129.34	1.14	1.04	1.23	255.17	2.405	0.076614	1874.16	1891.67	1.01	0.96	1.06	17.51	0.315	0.763166	1815.75	1811.36	1968.28	1901.26	1932.15	1987.43	2269.84	2327.92	1909.26	1989.28	1876.07	1792.06
201238_s_at	CAPZA2: capping protein (actin filament) muscle Z-line, alpha 2	BC005338	830	g13529130	2955.91	3643.63	1.23	1.12	1.36	687.71	3.502	0.012872	2955.91	2805.23	-1.05	-0.96	-1.15	-150.68	-0.937	0.396364	2989.07	2563.12	3246.87	3024.58	3504.88	3355.69	3745.25	3968.68	2851.28	2951.84	2817.49	2600.32
201239_s_at	LOC653566 /// SPCS2: signal peptidase complex subunit 2 homolog (S. cerevisiae) /// signal peptidase complex subunit 2 homolog pseudogene	BF530535	653566 /// 9789	Hs.77665.0	4047.98	4122.43	1.02	0.99	1.05	74.45	1.035	0.340573	4047.98	3533.57	-1.15	-0.91	-1.53	-514.41	-0.944	0.41386	3985.96	4167.54	3938.95	4099.47	4158.65	4035.68	4049.53	4245.87	1927.79	3816.98	4173.58	4215.93
201240_s_at	SPCS2: signal peptidase complex subunit 2 homolog (S. cerevisiae)	NM_014752	9789	g7661907	5253.69	5161.66	-1.02	-0.96	-1.08	-92.03	-0.515	0.634346	5253.69	5422.84	1.03	0.94	1.13	169.15	0.555	0.614658	5298.34	5415.72	5150.45	5150.26	4796.21	4963.76	5472.83	5413.85	4537.23	5602.41	5777.58	5774.14
201241_at	DDX1: DEAD (Asp-Glu-Ala-Asp) box polypeptide 1	NM_004939	1653	g4826685	4259.79	4015.19	-1.06	-0.97	-1.17	-244.6	-1.078	0.355251	4259.79	3748.15	-1.14	-0.98	-1.35	-511.64	-1.414	0.24996	4380.7	4192.56	4246.3	4219.6	4422.99	4373	3700.71	3564.05	3064.95	3189.64	4376.73	4361.29
201242_s_at	ATP1B1: ATPase, Na+/K+ transporting, beta 1 polypeptide	BC000006	481	g12652534	79.97	115.01	1.44	1.05	2.12	35.04	1.887	0.111141	79.97	69.17	-1.16	-0.73	-1.9	-10.8	-0.522	0.620125	59.85	50.26	110.15	99.62	135.68	133.71	94.39	96.25	37.5	51.61	96.7	90.89
201243_s_at	ATP1B1: ATPase, Na+/K+ transporting, beta 1 polypeptide	NM_001677	481	g4502276	117.87	168.46	1.43	1.11	1.9	50.59	2.307	0.060551	117.87	128.21	1.09	0.86	1.43	10.34	0.563	0.598358	106.51	79.41	150.53	135.03	194.48	192.72	131.67	154.96	108.51	122.18	153.89	128.25
201244_s_at	RAF1: v-raf-1 murine leukemia viral oncogene homolog 1	NM_002880	5894	g4506400	1645.29	1923.29	1.17	1.1	1.24	278	4.055	0.011462	1645.29	1919.96	1.17	0.95	1.39	274.67	1.249	0.296879	1720	1649.16	1651.6	1560.42	2029	2024.3	1840.03	1799.85	2402.34	2173.45	1545.75	1558.32
201245_s_at	OTUB1: OTU domain, ubiquitin aldehyde binding 1	AL523776	55611	Hs.108504.0	538.07	502.79	-1.07	-1.02	-1.13	-35.28	-2.151	0.09571	538.07	548.59	1.02	0.89	1.15	10.53	0.241	0.824264	520.32	535.58	547.44	548.92	527.2	530.25	475.23	478.49	637.76	605.2	492.13	459.28
201246_s_at	OTUB1: OTU domain, ubiquitin aldehyde binding 1	NM_017670	55611	g8923113	76.39	55.03	-1.39	-1.06	-1.87	-21.36	-2.011	0.091021	76.39	79.51	1.04	0.62	1.52	3.12	0.152	0.887121	92.19	84.53	59.1	69.73	76.04	56.24	45.38	42.48	137.12	60.87	61.51	58.54
201247_at	Hs.108689.0	BE513151		Hs.108689.0	445.6	297.94	-1.5	-1.31	-1.72	-147.66	-5.405	0.002226	445.6	555.76	1.25	1.04	1.46	110.16	2.007	0.123976	473.16	473.19	413.81	422.26	272.88	248.35	333.67	336.87	686.13	433.01	574.04	529.88
201248_s_at	SREBF2: sterol regulatory element binding transcription factor 2	NM_004599	6721	g4759169	431.62	292.27	-1.48	-1.15	-2.03	-139.35	-2.775	0.056583	431.62	483.57	1.12	0.92	1.33	51.95	0.984	0.387649	416.16	398.83	444.75	466.72	208.58	210.68	385.22	364.59	635.19	440.01	429.11	429.97
201250_s_at	SLC2A1: solute carrier family 2 (facilitated glucose transporter), member 1	NM_006516	6513	g5730050	108.18	77.25	-1.4	-1.16	-1.71	-30.93	-3.038	0.023154	108.18	96.05	-1.13	-0.86	-1.57	-12.13	-0.701	0.521453	95.85	103.84	127.68	105.34	73.05	60.03	96.37	79.53	71.44	65.73	124.56	122.47
201251_at	PKM2: pyruvate kinase, muscle	NM_002654	5315	g4505838	1287.39	791.09	-1.63	-1.55	-1.71	-496.3	-14.883	3.1e-05	1287.39	1701.98	1.32	0.68	1.96	414.59	0.83	0.467002	1314.69	1229.06	1251.41	1354.41	821.72	746.35	784.54	811.75	3178.71	985.47	1335.57	1308.18
201252_at	LOC652826 /// PSMC4: proteasome (prosome, macropain) 26S subunit, ATPase, 4 /// similar to 26S protease regulatory subunit 6B (MIP224) (MB67-interacting protein) (TAT-binding protein 7) (TBP-7)	NM_006503	5704 /// 652826	g5729990	2732.31	2123.95	-1.29	-1.23	-1.35	-608.37	-9.04	0.00011	2732.31	2551.11	-1.07	-1	-1.15	-181.2	-1.719	0.151014	2600.21	2719.72	2772.38	2836.95	2188.53	2213.83	2046.16	2047.27	2670.44	2279.17	2667.86	2586.98
201253_s_at	CDIPT: CDP-diacylglycerol--inositol 3-phosphatidyltransferase (phosphatidylinositol synthase)	NM_006319	10423	g5453905	2348.68	2496.35	1.06	0.68	1.45	147.67	0.27	0.803636	2348.68	2658.73	1.13	1	1.28	310.05	1.642	0.161974	2257.31	2124.2	2569.3	2443.91	1545.69	1586.8	3349.64	3503.28	2331.21	2433.47	2955.04	2915.19
201254_x_at	RPS6: ribosomal protein S6	NM_001010	6194	g4506730	21203.4	21243.4	1	0.99	1.01	40	0.3	0.781203	21203.4	22008	1.04	1.02	1.05	804.59	3.868	0.027073	21264.9	21117.4	21270.9	21160.4	21201.6	21202.1	21592.6	20977.3	22045.8	21487.7	22011.3	22487.2
201255_x_at	BAT3: HLA-B associated transcript 3	NM_004639	7917	g4758109	2951.16	2903.34	-1.02	-0.96	-1.08	-47.82	-0.46	0.664011	2951.16	2998.58	1.02	0.89	1.15	47.42	0.203	0.849468	3170.23	2924.26	2752.06	2958.08	3068.7	2859.87	2891.5	2793.29	3648.53	2738.72	2770.63	2836.42
201256_at	COX7A2L: cytochrome c oxidase subunit VIIa polypeptide 2 like	NM_004718	9167	g4758041	2635.19	2758.7	1.05	0.85	1.27	123.51	0.376	0.721198	2635.19	2651.94	1.01	0.89	1.16	16.75	0.08	0.940389	3119.45	2185.87	2712.27	2523.18	2311.97	2291.5	3273.69	3157.66	2422.5	2671.4	2780.21	2733.66
201257_x_at	RPS3A: ribosomal protein S3A	NM_001006	6189	g4506722	20057.5	20417.4	1.02	0.99	1.05	359.9	1.12	0.30769	20057.5	20406.2	1.02	0.99	1.04	348.71	1.133	0.305427	20217.4	19319.7	20231.6	20461.4	20841.2	20615.6	20284.4	19928.5	20099.4	20297.2	20312.5	20915.7
201258_at	RPS16: ribosomal protein S16	NM_001020	6217	g4506690	12786.5	12931.6	1.01	0.99	1.03	145.11	1.074	0.335947	12786.5	13393.6	1.05	1.01	1.09	607.11	1.989	0.116789	12874.8	12431.9	12896.2	12943	13043.2	12786.3	13034.6	12862.2	12601.5	13389.1	13753.5	13830.3
201259_s_at	SYPL1: synaptophysin-like 1	AI768845	6856	Hs.80919.0	1569.72	1440.92	-1.09	-0.96	-1.24	-128.8	-1.104	0.315759	1569.72	950.01	-1.65	-1.28	-2.3	-619.71	-3.57	0.022744	1635.65	1729.59	1475.54	1438.11	1286.89	1268.06	1595.27	1613.46	507.48	926.69	1200.34	1165.53
201260_s_at	SYPL1: synaptophysin-like 1	NM_006754	6856	g5803184	2951.06	2735.44	-1.08	-0.88	-1.38	-215.61	-0.591	0.592388	2951.06	2801.4	-1.05	-0.95	-1.18	-149.65	-0.822	0.453113	3079.68	3096.1	2865.99	2762.46	2036.53	2210.05	3310.72	3384.47	2454.66	2601.02	3135.89	3014.05
201263_at	TARS: threonyl-tRNA synthetase	NM_003191	6897	g4507366	4868.36	4322.87	-1.13	-0.99	-1.3	-545.49	-1.523	0.221901	4868.36	5670.13	1.16	1.12	1.21	801.77	5.93	0.004485	4953.36	4946.5	4816.54	4757.04	3651.17	3768.46	4917.68	4954.17	5995.15	5385.1	5609.57	5690.7
201264_at	COPE: coatomer protein complex, subunit epsilon	NM_007263	11316	g6005734	1041.64	632.61	-1.65	-1.2	-2.61	-409.03	-2.874	0.062881	1041.64	1106.5	1.06	0.9	1.22	64.87	0.648	0.561985	1064.76	1050.99	1011.08	1039.7	418.48	359.18	908.51	844.26	1365.85	882.32	1073.17	1104.67
201266_at	TXNRD1: thioredoxin reductase 1	NM_003330	7296	g4507746	6472.56	6053.79	-1.07	-0.92	-1.24	-418.77	-0.739	0.489501	6472.56	4839.74	-1.34	-1.03	-1.82	-1632.81	-1.875	0.120413	5940.73	5507.51	7448.92	6993.07	6798.79	6465.49	5381.1	5569.76	5874.89	6356.99	3436.36	3690.75
201267_s_at	PSMC3: proteasome (prosome, macropain) 26S subunit, ATPase, 3	AL545523	5702	Hs.250758.0	2492.98	1984.75	-1.26	-1.02	-1.64	-508.23	-1.777	0.164864	2492.98	2060.7	-1.21	-0.99	-1.54	-432.29	-1.581	0.202535	2343.79	2589.32	2429.03	2609.78	1582.75	1437.86	2354.9	2563.47	1277.17	2187.35	2419.32	2358.94
201268_at	NME1-NME2 /// NME2: non-metastatic cells 2, protein (NM23B) expressed in /// NME1-NME2	NM_002512	4831 /// 654364	g4505408	8896.04	9273.11	1.04	1.02	1.06	377.06	3.202	0.030372	8896.04	9293.86	1.04	1	1.09	397.82	1.806	0.159746	9026.71	8872.63	8787.92	8896.91	9472.75	9416.15	9006.71	9196.81	8894	8951.55	9653.7	9676.19
201269_s_at	NUDCD3: NudC domain containing 3	AB028991	23386	Hs.4770.0	61.43	68.6	1.12	0.98	1.28	7.17	1.364	0.221596	61.43	62.26	1.01	0.85	1.19	0.83	0.133	0.89919	59.04	60.02	54.4	72.26	64.8	65.1	65.04	79.46	55.32	63.49	54.37	75.86
201270_x_at	NUDCD3: NudC domain containing 3	NM_015332	23386	g13357209	362.24	514.73	1.42	1.28	1.58	152.5	5.212	0.002946	362.24	535.63	1.48	1.31	1.67	173.4	4.924	0.005681	340.74	332.03	372.12	404.05	500.52	461.36	577.84	519.22	592.96	447.78	541.16	560.63
201271_s_at	RALY: RNA binding protein, autoantigenic (hnRNP-associated with lethal yellow homolog (mouse))	NM_016732	22913	g8051630	1255.26	991.85	-1.27	-0.99	-1.75	-263.41	-1.58	0.211579	1255.26	1239.89	-1.01	-0.87	-1.21	-15.37	-0.127	0.906621	1227.26	1263.42	1276.76	1253.58	1316.95	1239.71	728	682.72	1585.05	1211.03	1040.29	1123.19
201272_at	AKR1B1: aldo-keto reductase family 1, member B1 (aldose reductase)	NM_001628	231	g4502048	6082.66	5291.25	-1.15	-1.05	-1.26	-791.41	-2.716	0.068907	6082.66	6461.9	1.06	1.01	1.12	379.23	1.796	0.161873	6192.2	6020.47	6124.41	5993.57	4829.81	4762.62	5859.96	5712.6	6897.97	6724.31	6056.55	6168.75
201273_s_at	SRP9: signal recognition particle 9kDa	NM_003133	6726	g4507216	11585.2	11813	1.02	0.99	1.06	227.74	0.93	0.392563	11585.2	11603.5	1	0.97	1.03	18.25	0.093	0.928721	11393.7	11302.3	11836.4	11808.4	12124.3	11237.4	12060	11830.1	11259.5	11915.8	11537.4	11701.2
201274_at	PSMA5: proteasome (prosome, macropain) subunit, alpha type, 5	NM_002790	5686	g4506186	5491.28	4550.92	-1.21	-1.09	-1.35	-940.36	-3.149	0.042383	5491.28	4755.61	-1.15	-1.05	-1.28	-735.67	-2.571	0.070831	5534.56	5495.57	5277.89	5657.1	5068.62	5029.93	4075.51	4029.63	4126.52	4469.38	5137.95	5288.57
201275_at	FDPS: farnesyl diphosphate synthase (farnesyl pyrophosphate synthetase, dimethylallyltranstransferase, geranyltranstransferase)	NM_002004	2224	g4503684	5183.9	3542.31	-1.46	-1.37	-1.56	-1641.59	-10.493	7.6e-05	5183.9	4373.68	-1.19	-1.12	-1.26	-810.22	-4.876	0.00403	5256.41	5406.09	5083.91	4989.18	3534.98	3827.21	3214.59	3592.44	4589.02	4586.53	4310.36	4008.78
201276_at	RAB5B: RAB5B, member RAS oncogene family	AF267863	5869	g12006052	846.64	841.25	-1.01	-0.92	-1.11	-5.39	-0.115	0.913789	846.64	1094.36	1.29	1.21	1.38	247.72	6.137	0.002519	811.16	877.71	878.44	819.25	770.12	764.84	931.32	898.71	1153.73	1034.77	1159.63	1029.3
201277_s_at	HNRPAB: heterogeneous nuclear ribonucleoprotein A/B	NM_004499	3182	g4758541	9705.38	9869.38	1.02	0.97	1.07	164	0.557	0.599723	9705.38	8930.61	-1.09	-1.04	-1.14	-774.77	-2.866	0.029626	9787.61	9240.01	9720.23	10073.6	10316.7	10238.5	9381.94	9540.35	9290.11	9279.29	8486.57	8666.45
201278_at	DAB2: disabled homolog 2, mitogen-responsive phosphoprotein (Drosophila)	N21202	1601	Hs.81988.0	18.46	16.23	-1.14	-0.71	-1.72	-2.24	-0.49	0.644024	18.46	16.52	-1.12	-0.7	-1.71	-1.95	-0.42	0.690751	29.72	12.88	15.19	16.06	21.26	19.74	11.03	12.88	23.96	11.51	14.91	15.69
201281_at	ADRM1: adhesion regulating molecule 1	NM_007002	11047	g5901959	2395.2	2128.69	-1.13	-1.02	-1.25	-266.51	-1.897	0.107337	2395.2	2337.5	-1.02	-0.95	-1.1	-57.7	-0.53	0.619256	2194.02	2278.88	2556.06	2551.84	1922.54	1984.4	2366.27	2241.57	2448.8	2394.99	2189.93	2316.28
201282_at	OGDH: oxoglutarate (alpha-ketoglutarate) dehydrogenase (lipoamide)	NM_002541	4967	g4505492	177.87	233.74	1.31	0.94	1.99	55.87	1.337	0.236385	177.87	230.72	1.3	0.95	1.94	52.85	1.351	0.240691	171.67	83.56	243.99	212.26	279.07	246.18	240.78	168.92	226.7	185.3	238.43	272.46
201283_s_at	TRAK1: trafficking protein, kinesin binding 1	J03068	22906	g181629	14.4	15.66	1.09	0.58	1.97	1.26	0.243	0.816444	14.4	16.33	1.13	0.74	1.92	1.93	0.468	0.657634	18.99	8.51	21.31	8.79	14.76	6.54	25.84	15.49	11.72	21.09	19.86	12.67
201284_s_at	APEH: N-acylaminoacyl-peptide hydrolase	NM_001640	327	g9951916	1170.73	1052.96	-1.11	-1.08	-1.15	-117.76	-5.326	0.001843	1170.73	1004.95	-1.16	-1.04	-1.32	-165.77	-2.261	0.100328	1196.44	1197.15	1128.68	1160.64	1081.37	1055.9	1011.49	1063.09	1216.62	965.36	912.91	924.92
201285_at	MKRN1: makorin, ring finger protein, 1	NM_013446	23608	g7305272	801.87	1449.84	1.81	1.45	2.32	647.97	4.514	0.004115	801.87	1322.33	1.65	1.37	2.06	520.46	5.187	0.010092	681.35	594.02	993.58	938.52	1685.86	1563.15	1322.86	1227.49	1317.83	1277.21	1300.25	1394.01
201288_at	ARHGDIB: Rho GDP dissociation inhibitor (GDI) beta	NM_001175	397	g10835001	12620.8	12136.8	-1.04	-0.97	-1.12	-483.94	-0.871	0.431805	12620.8	11613.2	-1.09	-1.03	-1.14	-1007.6	-2.705	0.038261	12666.3	12693.7	12023	13100.1	13362.7	12505.1	11658.1	11021.5	12464.1	11288.3	11123.2	11577.1
201290_at	SEC11A: SEC11 homolog A (S. cerevisiae)	NM_014300	23478	g7657608	3088.98	3548.72	1.15	1.1	1.19	459.74	5.86	0.00112	3088.98	3569.05	1.16	1.07	1.25	480.08	2.851	0.051541	2967.19	3106.17	3222.46	3060.09	3603.94	3671.01	3403.76	3516.17	3728.34	3942.1	3293.5	3312.28
201291_s_at	TOP2A: topoisomerase (DNA) II alpha 170kDa	AU159942	7153	Hs.156346.0	5208.16	6599.49	1.27	1.16	1.38	1391.32	4.553	0.004447	5208.16	5623.77	1.08	0.97	1.2	415.61	1.144	0.30503	5049.81	4756.01	5589.68	5437.16	6928.47	7085.91	6280.44	6103.14	6034.24	6275.3	5104.38	5081.17
201292_at	TOP2A: topoisomerase (DNA) II alpha 170kDa	AL561834	7153	Hs.156346.0	4270.58	5071.88	1.19	1.11	1.26	801.3	4.341	0.007581	4270.58	4564.62	1.07	0.94	1.2	294.05	0.881	0.434138	4193.2	4249.65	4542.5	4096.96	5489.28	5140.63	4854.04	4803.57	5119.44	5090.87	4193.52	3854.68
201293_x_at	PPIA: peptidylprolyl isomerase A (cyclophilin A)	NM_021130	5478	g10863926	17246.9	17351.4	1.01	0.89	1.12	104.42	0.086	0.937141	17246.9	17416	1.01	0.97	1.05	169.03	0.378	0.728015	17182	17130.6	17093.9	17581.3	19596.5	19305.2	15421.5	15082.2	16741.6	16597.7	18241.6	18082.9
201294_s_at	WSB1: WD repeat and SOCS box-containing 1	N24643	26118	Hs.187991.0	76.9	71.96	-1.07	-0.85	-1.38	-4.95	-0.464	0.660847	76.9	48.98	-1.57	-1.28	-1.94	-27.93	-3.63	0.011952	74.22	87.69	84.66	61.05	81.55	86.85	72.25	47.17	37.84	45.62	60.39	52.05
201295_s_at	Hs.187991.0	BF111821		Hs.187991.0	85.32	80.51	-1.06	-0.83	-1.36	-4.8	-0.397	0.704926	85.32	46.76	-1.82	-1.41	-2.42	-38.55	-3.795	0.010184	74.33	75.9	108.97	82.07	84.29	103.6	72.8	61.36	29.18	47.27	56.63	53.98
201296_s_at	WSB1: WD repeat and SOCS box-containing 1	NM_015626	26118	g7661595	4141.07	4364.85	1.05	0.98	1.13	223.78	1.136	0.332979	4141.07	4456.15	1.08	1.03	1.12	315.07	2.98	0.042238	4090.93	4063.24	4225.91	4184.21	3803.27	4451.24	4524.48	4680.43	4209.87	4680.05	4519.71	4414.96
201297_s_at	MOBKL1B: MOB1, Mps One Binder kinase activator-like 1B (yeast)	AK023321	55233	Hs.196437.0	656.89	613.32	-1.07	-0.88	-1.35	-43.57	-0.551	0.611423	656.89	573.75	-1.14	-1	-1.33	-83.14	-1.604	0.166288	686.11	675.37	696.24	569.83	515.31	461.09	720.78	756.09	511.07	699.56	551.79	532.59
201298_s_at	MOBKL1B: MOB1, Mps One Binder kinase activator-like 1B (yeast)	BC003398	55233	g13097287	1768	2012.16	1.14	0.9	1.4	244.16	0.936	0.403414	1768	1337.67	-1.32	-1.05	-1.73	-430.32	-2.063	0.100454	1934.41	1502.41	1875.58	1759.6	1650.2	1537.58	2412.46	2448.41	1160.39	1890.36	1200.32	1099.63
201299_s_at	MOBKL1B: MOB1, Mps One Binder kinase activator-like 1B (yeast)	NM_018221	55233	g8922670	1791.57	1493.62	-1.2	-1.04	-1.4	-297.95	-2.141	0.083476	1791.57	1702.53	-1.05	-0.95	-1.17	-89.04	-0.818	0.444714	1959.56	1797.41	1818.87	1590.45	1450.36	1182.34	1697.09	1644.68	1789.06	1870.83	1622.59	1527.63
201300_s_at	PRNP: prion protein (p27-30) (Creutzfeldt-Jakob disease, Gerstmann-Strausler-Scheinker syndrome, fatal familial insomnia)	NM_000311	5621	g4506112	1786.38	1851.13	1.04	0.94	1.14	64.76	0.604	0.572266	1786.38	1473.28	-1.21	-1.01	-1.5	-313.09	-1.759	0.160089	1945.8	1783.71	1714.39	1701.61	1667.25	1736.27	2065.68	1935.34	1162.49	1211.57	1841.14	1677.93
201301_s_at	ANXA4: annexin A4	BC000182	307	g12652858	337.05	477.39	1.42	1.22	1.64	140.34	3.588	0.019224	337.05	318.23	-1.06	-0.8	-1.53	-18.82	-0.309	0.774804	384.4	343.01	315.58	305.2	528.98	539.83	448.15	392.6	180.65	262.14	417.1	413.04
201302_at	ANXA4: annexin A4	NM_001153	307	g4809272	295.97	398	1.34	1.19	1.54	102.03	4.005	0.008515	295.97	384.56	1.3	1.01	1.63	88.59	1.682	0.167096	342.03	311.97	284.74	245.12	400.57	439.28	379.72	372.41	294.1	313.75	496.94	433.44
201303_at	EIF4A3: eukaryotic translation initiation factor 4A, isoform 3	NM_014740	9775	g7661919	5941.22	5768.57	-1.03	-0.94	-1.13	-172.65	-0.543	0.623323	5941.22	6248.12	1.05	0.98	1.13	306.9	1.16	0.325576	5932.15	5821.16	5979.56	6032.02	6343.28	6273.87	5131.62	5325.5	5730.37	5873.37	6629.71	6759.04
201304_at	NDUFA5: NADH dehydrogenase (ubiquinone) 1 alpha subcomplex, 5, 13kDa	NM_005000	4698	g13699821	4496.19	5053.28	1.12	1.08	1.17	557.09	4.432	0.004723	4496.19	4671.48	1.04	0.94	1.14	175.29	0.639	0.561234	4634.98	4637.36	4371.13	4341.28	5203	5101.18	4772.05	5136.9	3896.61	5000.27	4980.72	4808.32
201305_x_at	ANP32B: acidic (leucine-rich) nuclear phosphoprotein 32 family, member B	AV712577	10541	Hs.84264.0	11253.3	12076.9	1.07	1.04	1.11	823.54	3.802	0.012046	11253.3	12062.8	1.07	1.04	1.1	809.51	4.238	0.00622	11365.4	10913.8	11292.3	11441.8	12541.4	12193	11796.2	11776.8	11871.8	11741.4	12348	12290.1
201306_s_at	ANP32B: acidic (leucine-rich) nuclear phosphoprotein 32 family, member B	NM_006401	10541	g5454087	10575.2	11428.2	1.08	1.04	1.12	853.01	3.681	0.012917	10575.2	11445.4	1.08	1.04	1.12	870.27	3.282	0.023718	10892.4	10673.3	10306.1	10428.9	11960.6	11452.8	11173.4	11125.9	10868.8	11275.9	11818	11819
201307_at	SEPT11: septin 11	AL534972	55752	Hs.8768.0	1399.48	956.72	-1.46	-0.93	-3.47	-442.76	-1.312	0.280101	1399.48	1297.16	-1.08	-0.97	-1.22	-102.32	-1.126	0.332602	1404.45	1342.65	1459.16	1391.64	374.66	372.57	1541.93	1537.71	1390.57	1494.23	1187.5	1116.33
201308_s_at	SEPT11: septin 11	NM_018243	55752	g8922711	42.43	38.53	-1.1	-0.68	-2.55	-3.9	-0.283	0.792891	42.43	32.22	-1.32	-1.05	-1.67	-10.22	-1.976	0.096315	35.43	36.52	51.52	46.27	15.77	19.82	72.89	45.64	23.25	39.82	32.46	33.34
201309_x_at	C5orf13: chromosome 5 open reading frame 13	U36189	9315	g1244509	567.92	425.04	-1.34	-0.78	-4.48	-142.88	-0.781	0.489901	567.92	373.48	-1.52	-1.28	-1.85	-194.44	-4.354	0.007199	511.75	623.52	583.98	552.42	749.16	728.92	107.79	114.28	281.61	463.96	357.39	390.95
201310_s_at	C5orf13: chromosome 5 open reading frame 13	NM_004772	9315	g4758865	4057.68	2917.39	-1.39	-0.85	-3.82	-1140.29	-1.008	0.387026	4057.68	4094.15	1.01	0.95	1.07	36.47	0.256	0.806804	4310.3	3948.37	3951.84	4020.23	4958	4782.67	923.5	1005.42	4324.86	3814.24	4222.56	4014.94
201311_s_at	SH3BGRL: SH3 domain binding glutamic acid-rich protein like	AL515318	6451	Hs.14368.0	1766.51	2219.27	1.26	1.12	1.4	452.76	3.237	0.031356	1766.51	1712.36	-1.03	-0.86	-1.29	-54.15	-0.257	0.811924	1880.56	1835.65	1653.66	1696.15	2513.91	2350.38	2054.4	1958.37	1122.36	1908.16	2038.75	1780.17
201312_s_at	SH3BGRL: SH3 domain binding glutamic acid-rich protein like	NM_003022	6451	g4506924	4709.06	5444.03	1.16	1.09	1.23	734.97	3.806	0.015177	4709.06	5150.54	1.09	1.05	1.14	441.48	3.667	0.010676	4783.9	4926.46	4558.82	4567.06	5786.61	5671.67	5058.4	5259.43	5064.25	5331.52	5232.92	4973.48
201313_at	ENO2: enolase 2 (gamma, neuronal)	NM_001975	2026	g5803010	564.26	793.97	1.41	1.3	1.53	229.71	8.102	0.000916	564.26	654.28	1.16	0.98	1.35	90.02	1.491	0.206018	518.09	522.83	599.1	617.02	774.78	812.77	817.39	770.94	730.97	492.66	708.38	685.11
201314_at	STK25: serine/threonine kinase 25 (STE20 homolog, yeast)	NM_006374	10494	g5454173	980.18	1004.22	1.02	0.96	1.1	24.05	0.586	0.579091	980.18	845.85	-1.16	-1.06	-1.27	-134.33	-2.736	0.03703	935.83	939.98	1061.03	983.87	1042.01	1065.29	957.54	952.06	782.92	772.06	910.16	918.28
201315_x_at	IFITM2: interferon induced transmembrane protein 2 (1-8D)	NM_006435	10581	g10835237	2622.06	3399.02	1.3	1.19	1.42	776.96	5.245	0.003863	2622.06	2149.79	-1.22	-1.06	-1.42	-472.27	-2.316	0.061507	2478.19	2394.48	2638.29	2977.28	3570.89	3269.21	3470.44	3285.55	1753.28	2043.02	2353.21	2449.66
201316_at	PSMA2: proteasome (prosome, macropain) subunit, alpha type, 2	AL523904	5683	Hs.181309.0	1386.18	1252.92	-1.11	-1.02	-1.21	-133.26	-1.938	0.10282	1386.18	1870.45	1.35	1.23	1.48	484.27	4.983	0.005893	1443.77	1472.4	1340.99	1287.57	1350.52	1340.14	1164.11	1156.92	1771.73	2123.81	1743.37	1842.9
201317_s_at	PSMA2: proteasome (prosome, macropain) subunit, alpha type, 2	NM_002787	5683	g4506180	7869.94	8166.9	1.04	1.02	1.05	296.96	3.757	0.010886	7869.94	7830.49	-1.01	-0.94	-1.08	-39.45	-0.118	0.913084	7924.47	7997.14	7700.11	7858.03	8223.71	8211.33	8025.38	8207.17	6961.6	8556.38	7935.13	7868.84
201318_s_at	MRCL3 /// MRLC2: myosin regulatory light chain MRCL3 /// myosin regulatory light chain MRLC2	NM_006471	103910 /// 10627	g5453739	9924.84	10521.4	1.06	0.96	1.16	596.6	0.955	0.408339	9924.84	9890.93	-1	-0.93	-1.08	-33.9	-0.076	0.943664	9928.15	9731.64	9978.57	10061	9371.19	9542.71	11779.3	11392.5	8836.44	9503.77	10596.3	10627.2
201319_at	LOC645094 /// MRCL3: myosin regulatory light chain MRCL3 /// similar to myosin regulatory light chain-like	NM_006471	10627 /// 645094	g5453739	5316.9	5491.43	1.03	0.82	1.25	174.53	0.251	0.817331	5316.9	4918.54	-1.08	-0.97	-1.21	-398.36	-1.202	0.305862	5313.86	5320	5524.51	5109.24	4297.88	4313.36	6483.97	6870.52	3988.59	5000.95	5355.45	5329.18
201320_at	SMARCC2: SWI/SNF related, matrix associated, actin dependent regulator of chromatin, subfamily c, member 2	BF663402	6601	Hs.236030.0	249.09	258.52	1.04	0.97	1.1	9.43	0.959	0.391086	249.09	315.33	1.27	0.93	1.6	66.24	1.303	0.282732	244.2	260.34	248.24	243.61	259.09	271.58	270.63	232.79	460.45	307.81	258.14	234.94
201321_s_at	SMARCC2: SWI/SNF related, matrix associated, actin dependent regulator of chromatin, subfamily c, member 2	NM_003075	6601	g4507080	803.48	774.71	-1.04	-0.97	-1.11	-28.77	-0.89	0.419224	803.48	810.87	1.01	0.95	1.07	7.39	0.258	0.807286	843.08	780.25	806.88	783.7	848.98	775.43	766.3	708.1	817.36	878.34	769.52	778.26
201322_at	ATP5B: ATP synthase, H+ transporting, mitochondrial F1 complex, beta polypeptide	NM_001686	506	g4502294	6688.38	5969.35	-1.12	-1.02	-1.25	-719.03	-1.937	0.141936	6688.38	6705.4	1	0.96	1.05	17.02	0.097	0.92719	6876.66	6615.12	6559.55	6702.19	5469.66	5253.72	6795.61	6358.41	6254.86	6700.94	6887.22	6978.58
201323_at	EBNA1BP2: EBNA1 binding protein 2	NM_006824	10969	g5803110	6621.35	6513.94	-1.02	-0.99	-1.05	-107.41	-0.89	0.422932	6621.35	6081.72	-1.09	-1.03	-1.16	-539.64	-2.432	0.085589	6595.75	6512.25	6635.03	6742.39	6586.41	6781.94	6264.9	6422.52	6294.68	6576.04	5619.49	5836.67
201324_at	EMP1: epithelial membrane protein 1	NM_001423	2012	g4503558	33.23	34.67	1.04	0.44	1.67	1.44	0.117	0.91422	33.23	23.06	-1.44	-0.98	-2.6	-10.18	-1.566	0.200272	33.49	27.61	35.56	36.27	12.91	14.23	56.71	54.84	28.27	37.51	17.17	9.27
201326_at	CCT6A: chaperonin containing TCP1, subunit 6A (zeta 1)	BE737030	908	Hs.82916.0	4043.88	3326.63	-1.22	-1.13	-1.31	-717.24	-4.708	0.014864	4043.88	4477.92	1.11	1.01	1.21	434.05	1.794	0.16756	4026.38	4005.27	4138.48	4005.39	3396.03	3719.73	3098.43	3092.35	5070.09	4665.49	4102.59	4073.52
201327_s_at	CCT6A: chaperonin containing TCP1, subunit 6A (zeta 1)	NM_001762	908	g4502642	5653.48	5039.45	-1.12	-1.08	-1.17	-614.03	-5.097	0.002812	5653.48	4556.38	-1.24	-1.14	-1.36	-1097.09	-4.339	0.016137	5764.53	5776.08	5597.55	5475.75	4813.91	4943	5207.43	5193.45	4782.48	5100.99	4344.97	3997.09
201328_at	ETS2: v-ets erythroblastosis virus E26 oncogene homolog 2 (avian)	AL575509	2114	Hs.85146.0	1215.22	1659.92	1.37	0.61	2.13	444.71	0.799	0.48196	1215.22	1496.46	1.23	1.02	1.45	281.24	1.844	0.150359	1305.38	1112.96	1242.29	1200.24	2609.04	2632.71	714.74	683.2	1742.87	1758.36	1267.01	1217.6
201329_s_at	ETS2: v-ets erythroblastosis virus E26 oncogene homolog 2 (avian)	NM_005239	2114	g4885220	678.48	650.69	-1.04	-0.87	-1.3	-27.79	-0.348	0.749786	678.48	716.85	1.06	0.88	1.23	38.36	0.53	0.630223	669.94	701.16	701.99	640.84	808.68	749.55	465.4	579.14	693.23	923.63	636.21	614.32
201330_at	RARS: arginyl-tRNA synthetase	NM_002887	5917	g4506428	3003.08	3068.37	1.02	0.99	1.06	65.3	1.008	0.357581	3003.08	3160.29	1.05	0.98	1.13	157.22	1.154	0.322106	3079.79	2907.88	2994.85	3029.78	3187.32	3065.75	3093	2927.41	3468.72	3283.39	2901.8	2987.26
201331_s_at	STAT6: signal transducer and activator of transcription 6, interleukin-4 induced	BC004973	6778	g13436385	1069.78	1203.78	1.13	1.06	1.19	134.01	3.421	0.016389	1069.78	938.05	-1.14	-0.96	-1.39	-131.73	-1.271	0.27939	1045.79	991.34	1129.13	1112.85	1251.94	1166.52	1233.99	1162.69	762.71	772.05	1120.26	1097.17
201332_s_at	STAT6: signal transducer and activator of transcription 6, interleukin-4 induced	NM_003153	6778	g4507258	33.02	38.68	1.17	0.94	1.44	5.66	1.209	0.277149	33.02	29.63	-1.11	-0.89	-1.43	-3.39	-0.775	0.469513	37.1	37.12	32.01	25.85	46.55	43.83	33.58	30.77	26.59	23.63	28.77	39.52
201334_s_at	ARHGEF12: Rho guanine nucleotide exchange factor (GEF) 12	AB002380	23365	Hs.6582.0	980.13	890.79	-1.1	-0.88	-1.46	-89.34	-0.657	0.550207	980.13	771.37	-1.27	-0.86	-2.4	-208.76	-0.932	0.41567	1105.95	965.16	917.05	932.36	653.51	695.43	1183.13	1031.11	1175.81	1127.56	401.62	380.49
201335_s_at	ARHGEF12: Rho guanine nucleotide exchange factor (GEF) 12	NM_015313	23365	g7662087	29.54	32.19	1.09	0.9	1.31	2.65	0.759	0.478352	29.54	32.76	1.11	0.71	1.54	3.22	0.434	0.689381	33.43	32.97	24.97	26.79	32.49	34.69	24.44	37.14	39.46	49.56	21.31	20.7
201336_at	VAMP3: vesicle-associated membrane protein 3 (cellubrevin)	BC003570	9341	g13097737	796.39	2271.06	2.85	1.79	5.09	1474.67	3.486	0.020163	796.39	1365.31	1.71	0.92	3.21	568.92	1.451	0.207792	441.49	459.37	1129.92	1154.8	2864.09	2967.07	1656.24	1596.84	792.95	770.9	1985.63	1911.78
201337_s_at	VAMP3: vesicle-associated membrane protein 3 (cellubrevin)	NM_004781	9341	g9257252	130.38	266.27	2.04	1.4	3.17	135.88	3.118	0.02289	130.38	127.95	-1.02	-0.6	-1.88	-2.43	-0.058	0.95575	77.57	93.92	178.75	171.29	338.85	311.18	222.73	192.3	48.89	99.48	189.86	173.57
201338_x_at	GTF3A: general transcription factor IIIA	NM_002097	2971	g4753158	10012.7	9865.21	-1.01	-0.96	-1.07	-147.51	-0.453	0.67455	10012.7	9564.23	-1.05	-1.02	-1.07	-448.48	-3.344	0.026083	10271.7	10119.6	9704.45	9955.12	10517.1	10242.6	9356.03	9345.12	9592.62	9446.06	9508.48	9709.75
201339_s_at	SCP2: sterol carrier protein 2	NM_002979	6342	g4506822	4069.77	4520.7	1.11	1.03	1.19	450.93	2.211	0.105875	4069.77	3654.29	-1.11	-0.95	-1.35	-415.48	-1.072	0.360607	4201.63	4026.5	4044.43	4006.52	4985.26	4713.49	4135.45	4248.62	2565.86	4376.5	3895.88	3778.94
201340_s_at	ENC1: ectodermal-neural cortex (with BTB-like domain)	AF010314	8507	g2415303	44.56	46.52	1.04	0.71	1.39	1.96	0.211	0.845286	44.56	27.87	-1.6	-1.21	-2.31	-16.69	-3.058	0.042486	47.46	40.46	42.96	47.36	68.44	50.73	42.16	24.74	18.89	20.27	31.38	40.95
201341_at	ENC1: ectodermal-neural cortex (with BTB-like domain)	NM_003633	8507	g4505460	119.55	104.25	-1.15	-0.86	-1.68	-15.3	-0.734	0.507417	119.55	83.67	-1.43	-1.16	-1.81	-35.88	-2.983	0.030013	114.56	117.73	107.96	137.95	143.63	126.21	93.52	53.64	113.03	78.64	66.41	76.59
201342_at	SNRPC: small nuclear ribonucleoprotein polypeptide C	NM_003093	6631	g4507126	5456.07	4908.82	-1.11	-1	-1.24	-547.25	-1.705	0.174439	5456.07	5879.23	1.08	1.04	1.12	423.15	3.083	0.022947	5703.31	5423.71	5386.8	5310.47	4436.32	4315.7	5392.62	5490.66	5705.42	5771.47	5851.98	6188.03
201343_at	UBE2D2: ubiquitin-conjugating enzyme E2D 2 (UBC4/5 homolog, yeast)	BE621259	7322	Hs.108332.0	2751.6	2742.32	-1	-0.89	-1.15	-9.28	-0.044	0.966978	2751.6	2964.31	1.08	1.04	1.12	212.71	3.548	0.026429	2789.62	2592.98	2858.53	2765.25	3072.13	3099.47	2321.55	2476.13	2911.1	3004.77	2957.11	2984.26
201344_at	UBE2D2: ubiquitin-conjugating enzyme E2D 2 (UBC4/5 homolog, yeast)	BF196642	7322	Hs.108332.0	421.51	269.53	-1.56	-1.13	-2.47	-151.98	-2.413	0.077986	421.51	484.35	1.15	1.06	1.25	62.83	2.903	0.052149	391.08	384.29	472.75	437.93	163.9	169.34	373.15	371.74	481.98	484.51	471.19	499.72
201345_s_at	UBE2D2: ubiquitin-conjugating enzyme E2D 2 (UBC4/5 homolog, yeast)	NM_003339	7322	g4507774	3002.97	3617.35	1.2	1.05	1.37	614.38	2.201	0.086596	3002.97	2829.01	-1.06	-0.97	-1.16	-173.96	-1.071	0.326317	2749.99	2832.11	3201.99	3227.78	4125.26	3962.49	3262.74	3118.89	2520.72	2871.19	2939.73	2984.39
201346_at	ADIPOR2: adiponectin receptor 2	NM_024551	79602	g13375714	1885.04	2130.67	1.13	1	1.27	245.64	1.617	0.173465	1885.04	2093.64	1.11	1.01	1.22	208.61	1.753	0.135122	2060.18	1877.2	1882.65	1720.11	2381.87	2341.5	1851.31	1948.01	2296.45	2221.19	1930.65	1926.29
201347_x_at	GRHPR: glyoxylate reductase/hydroxypyruvate reductase	NM_012203	9380	g6912395	2654.16	3016.63	1.14	1.08	1.2	362.47	3.906	0.008528	2654.16	2407.97	-1.1	-0.99	-1.24	-246.19	-1.454	0.215534	2842.49	2508.54	2587.46	2678.15	3095.32	3138.55	2931.56	2901.08	2033.93	2280.4	2671.86	2645.68
201349_at	SLC9A3R1: solute carrier family 9 (sodium/hydrogen exchanger), member 3 regulator 1	NM_004252	9368	g4759139	1564.42	1243.86	-1.26	-1.09	-1.47	-320.57	-2.715	0.041172	1564.42	1484.15	-1.05	-0.89	-1.29	-80.27	-0.48	0.656457	1675.41	1671.69	1476.37	1434.23	1069.53	1077.73	1376.43	1451.75	1878.29	1571.78	1307.2	1179.34
201350_at	FLOT2: flotillin 2	NM_004475	2319	g4758393	284.68	459.01	1.61	1.42	1.81	174.33	5.255	0.012507	284.68	384.59	1.35	1.05	1.66	99.9	1.9	0.152641	274.63	283.96	293.61	286.52	415.57	390.59	505.03	524.85	352.79	249.98	464.42	471.16
201351_s_at	YME1L1: YME1-like 1 (S. cerevisiae)	AF070656	10730	g4454687	4053.96	3989.84	-1.02	-0.94	-1.11	-64.12	-0.323	0.766664	4053.96	3570.56	-1.14	-1.05	-1.23	-483.4	-2.749	0.066171	4071.07	3963.55	4095.28	4085.94	3649.71	3652.61	4356.57	4300.45	3846.29	3883.92	3353.53	3198.49
201352_at	YME1L1: YME1-like 1 (S. cerevisiae)	NM_014263	10730	g7657688	4191.09	3872.64	-1.08	-0.92	-1.3	-318.45	-0.775	0.484683	4191.09	3466.44	-1.21	-0.91	-1.78	-724.65	-1.056	0.363236	4427.33	4390.58	4104.28	3842.17	3134.77	3271.89	4508.62	4575.29	4433.69	4810.58	2400.28	2221.21
201353_s_at	BAZ2A: bromodomain adjacent to zinc finger domain, 2A	AI653126	11176	Hs.277401.0	261.66	206.98	-1.26	-1.02	-1.58	-54.68	-1.761	0.129326	261.66	272.33	1.04	0.86	1.27	10.67	0.34	0.745366	323.91	259.63	251.19	211.9	167.67	175.35	246.57	238.34	309.38	227.99	244.52	307.44
201354_s_at	BAZ2A: bromodomain adjacent to zinc finger domain, 2A	AA788652	11176	Hs.277401.0	355.11	394.33	1.11	1.07	1.15	39.23	4.43	0.004768	355.11	349.84	-1.02	-0.9	-1.16	-5.27	-0.194	0.857561	364.88	364.69	347.89	342.96	413.34	389.1	381.5	393.4	324.92	286.99	389.25	398.19
201356_at	SF3A1: splicing factor 3a, subunit 1, 120kDa	BF129339	10291	Hs.288883.0	3125.18	2892.72	-1.08	-1.04	-1.13	-232.45	-3.053	0.025095	3125.18	3101.9	-1.01	-0.97	-1.05	-23.28	-0.321	0.759949	3222.58	3022.31	3082.58	3173.24	2968.73	2971.01	2919.38	2711.77	3080.47	3222.7	3149.85	2954.59
201357_s_at	SF3A1: splicing factor 3a, subunit 1, 120kDa	NM_005877	10291	g5032086	474.05	342.07	-1.39	-1.31	-1.46	-131.98	-9.344	0.000373	474.05	524.01	1.11	0.72	1.5	49.95	0.446	0.684852	475.3	451.72	508.47	460.72	335.78	361.39	331.44	339.69	852.16	467.72	405.01	371.14
201358_s_at	COPB1: coatomer protein complex, subunit beta 1	NM_016451	1315	g7705368	5290.69	5553.28	1.05	0.97	1.13	262.59	1.061	0.341263	5290.69	5630.92	1.06	1	1.14	340.23	1.537	0.184443	5622.24	5133.78	5291.22	5115.5	5986.68	5855.13	5083.32	5287.97	6133	5512.02	5642.98	5235.67
201359_at	COPB1: coatomer protein complex, subunit beta 1	NM_016451	1315	g7705368	2736.31	2923.73	1.07	0.95	1.19	187.42	0.955	0.394446	2736.31	2888.28	1.06	1	1.12	151.97	1.563	0.169722	2877.15	2755.19	2778.93	2533.97	3113.13	3339.15	2682.56	2560.09	3029.75	2727.01	2944.55	2851.8
201360_at	CST3: cystatin C (amyloid angiopathy and cerebral hemorrhage)	NM_000099	1471	g4503106	297.39	322.89	1.09	0.86	1.32	25.5	0.612	0.57906	297.39	291.77	-1.02	-0.83	-1.31	-5.61	-0.142	0.894695	292.66	276.72	293.33	326.83	412.24	369.96	252.82	256.53	296.54	183.12	350.99	336.45
201361_at	TMEM109: transmembrane protein 109	NM_024092	79073	g13129091	3659.93	3595.27	-1.02	-0.96	-1.08	-64.66	-0.472	0.661609	3659.93	3865.7	1.06	0.97	1.15	205.77	1.021	0.348565	3499.67	3396.03	3816.33	3927.67	3568.49	3503.89	3749.53	3559.15	3595.63	3634.78	3966.84	4265.54
201362_at	IVNS1ABP: influenza virus NS1A binding protein	AF205218	10625	g12003206	771.27	822.48	1.07	0.81	1.33	51.21	0.428	0.69512	771.27	702.63	-1.1	-1	-1.21	-68.63	-1.607	0.162863	795.13	694.33	799.25	796.36	1003.49	1043.2	650.41	592.8	666.53	629.05	732.56	782.39
201363_s_at	IVNS1ABP: influenza virus NS1A binding protein	AB020657	10625	g4240188	498.55	545.68	1.09	0.84	1.39	47.13	0.59	0.581317	498.55	452.6	-1.1	-0.91	-1.32	-45.95	-0.864	0.421642	459.1	404.98	579.65	550.47	671.45	658.01	420.18	433.07	366.89	430.48	525.45	487.59
201364_s_at	OAZ2: ornithine decarboxylase antizyme 2	AF242521	4947	g9802039	552.16	725.84	1.31	1.24	1.39	173.68	8.148	0.000229	552.16	398.11	-1.39	-1.19	-1.65	-154.05	-3.831	0.02109	528.69	565.57	531.02	583.37	698.83	717.27	774.17	713.09	297.93	380.76	458.51	455.25
201365_at	OAZ2: ornithine decarboxylase antizyme 2	NM_002537	4947	g9845506	568.26	807.84	1.42	1.25	1.61	239.58	4.375	0.00671	568.26	582.24	1.02	0.9	1.16	13.98	0.312	0.765459	483.25	570.98	615.13	603.68	913.38	834.24	693.08	790.68	497.43	621.68	647.15	562.69
201366_at	ANXA7: annexin A7	NM_004034	310	g4809278	2163.05	2063.37	-1.05	-0.99	-1.11	-99.68	-1.362	0.26242	2163.05	2561.27	1.18	0.98	1.39	398.22	1.502	0.229749	2165.44	2145.03	2194.28	2147.44	1864.47	2063.91	2120.89	2204.21	2227.57	1993.01	3031.9	2992.61
201367_s_at	ZFP36L2: zinc finger protein 36, C3H type-like 2	AI356398	678	Hs.78909.0	37.94	19.6	-1.94	-1.39	-2.8	-18.33	-3.214	0.021269	37.94	23.42	-1.62	-1.17	-2.29	-14.52	-2.451	0.05208	46.42	38.26	42.2	24.86	22.65	26.23	10.94	18.6	23.3	33.45	20.69	16.22
201368_at	ZFP36L2: zinc finger protein 36, C3H type-like 2	U07802	678	Hs.78909.0	3970.26	2279.89	-1.74	-1.27	-2.56	-1690.36	-3.036	0.023372	3970.26	2902.15	-1.37	-1.11	-1.69	-1068.1	-2.399	0.059036	4666.55	4539.16	3436.66	3238.66	3057.23	2946.81	1557.24	1558.29	3275.3	3346.68	2692.93	2293.7
201369_s_at	ZFP36L2: zinc finger protein 36, C3H type-like 2	NM_006887	678	g5901899	581.94	286.68	-2.03	-1.52	-2.88	-295.26	-4.272	0.005251	581.94	458.27	-1.27	-0.9	-2.05	-123.67	-1.085	0.33496	692.57	637.19	500.28	497.72	401.96	331.98	209.96	202.82	749.88	453.7	332.62	296.87
201370_s_at	CUL3: cullin 3	AU145232	8452	Hs.78946.0	784.82	573.12	-1.37	-0.92	-2.65	-211.7	-1.253	0.297382	784.82	1232.43	1.57	1.3	1.84	447.61	3.52	0.03687	787.97	737.22	810.83	803.26	844.68	882.09	309.45	256.27	1061.64	971.47	1459.45	1437.17
201371_s_at	CUL3: cullin 3	AF062537	8452	g3139078	3345.79	4090.51	1.22	0.92	1.62	744.72	1.17	0.289741	3345.79	4170.14	1.25	1.04	1.54	824.35	2.093	0.115807	3549	2232.56	3941.85	3659.73	4926.01	5021.5	3225.49	3189.03	4146.15	3896.15	4263.51	4374.73
201372_s_at	CUL3: cullin 3	NM_003590	8452	g4503164	32.58	39.75	1.22	0.5	2	7.17	0.495	0.651755	32.58	61.89	1.9	1.59	2.31	29.31	6.038	0.00102	33.62	23.38	37.11	36.19	65.78	62.61	14.29	16.3	54.02	57.18	67.8	68.56
201375_s_at	PPP2CB: protein phosphatase 2 (formerly 2A), catalytic subunit, beta isoform	NM_004156	5516	g4758951	2829.37	4609.23	1.63	1.58	1.69	1779.86	26.582	0	2829.37	3524.39	1.25	0.94	1.56	695.02	1.3	0.282943	2750.22	2795.34	2980	2791.91	4642.67	4491.98	4606.93	4695.33	2393.59	2849.81	4558.29	4295.86
201376_s_at	HNRPF: heterogeneous nuclear ribonucleoprotein F	AI591354	3185	Hs.808.0	1851.93	1534.27	-1.21	-1.05	-1.41	-317.66	-2.339	0.094137	1851.93	1429.91	-1.3	-1.09	-1.6	-422.02	-2.533	0.080565	1936.15	1832.12	1820.48	1818.98	1295.83	1315.01	1730.06	1796.19	997.17	1793.76	1436.03	1492.67
201377_at	UBAP2L: ubiquitin associated protein 2-like	NM_014847	9898	g7661941	1921.24	1948.36	1.01	0.87	1.17	27.12	0.154	0.8846	1921.24	2576.5	1.34	1.16	1.54	655.26	3.152	0.034419	2113.6	1967.81	1866.73	1736.82	2255.44	2182.32	1710.5	1645.16	3005.11	2793.29	2211.75	2295.86
201378_s_at	UBAP2L: ubiquitin associated protein 2-like	NM_014847	9898	g7661941	748.99	655.57	-1.14	-0.95	-1.44	-93.41	-1.125	0.336249	748.99	1191.69	1.59	0.94	2.24	442.7	1.499	0.230226	741.84	797.96	714.28	741.85	822.38	767.05	508.92	523.93	2070.28	994.2	861.05	841.21
201379_s_at	TPD52L2: tumor protein D52-like 2	NM_003288	7165	g4507642	1184.57	1585.83	1.34	1.2	1.49	401.26	4.098	0.013435	1184.57	1184.72	1	0.81	1.2	0.14	0.001	0.999236	1198.6	1066.3	1223.96	1249.44	1481.72	1422.74	1614.59	1824.28	1452.64	1381.45	932.56	972.23
201380_at	CRTAP: cartilage associated protein	NM_006371	10491	g5453600	215.46	243.46	1.13	0.78	1.51	28.01	0.599	0.585221	215.46	216.11	1	0.77	1.26	0.65	0.021	0.984475	222.83	241.72	219.88	177.39	157.02	179.1	341.47	296.26	157.32	178.04	254.28	274.8
201381_x_at	CACYBP: calcyclin binding protein	AF057356	27101	g3063652	6544.56	5588.41	-1.17	-1.06	-1.31	-956.15	-2.659	0.073021	6544.56	6232.79	-1.05	-0.94	-1.18	-311.77	-0.725	0.519271	6449.05	6514.9	6520.27	6694.02	6226.37	6173.92	5076.86	4876.5	5162.66	5927.76	6926.71	6914.03
201382_at	CACYBP: calcyclin binding protein	NM_014412	27101	g7656951	180.68	155.77	-1.16	-1.03	-1.3	-24.92	-2.071	0.094282	180.68	184	1.02	0.9	1.16	3.31	0.233	0.823338	187.33	201.83	180.97	152.6	159.13	170.62	141.25	152.08	173.57	204.01	196.33	162.08
201383_s_at	LOC727732 /// NBR1: neighbor of BRCA1 gene 1 /// similar to neighbor of BRCA1 gene 1	AL044170	4077 /// 727732	Hs.277721.0	115.26	125.03	1.08	0.93	1.27	9.77	0.879	0.413491	115.26	113.57	-1.01	-0.84	-1.25	-1.69	-0.124	0.905831	113.74	138.3	106.18	102.83	124.95	103.25	136.28	135.64	80.66	127.61	123.8	122.22
201384_s_at	LOC727732 /// NBR1: neighbor of BRCA1 gene 1 /// similar to neighbor of BRCA1 gene 1	NM_005899	4077 /// 727732	g5174504	730.53	648.85	-1.13	-0.77	-1.8	-81.68	-0.496	0.64069	730.53	819.12	1.12	0.84	1.49	88.6	0.667	0.530105	981.33	584.49	701.84	654.45	422.67	391.47	893.2	888.04	617.22	680.75	1028.78	949.75
201385_at	DHX15: DEAH (Asp-Glu-Ala-His) box polypeptide 15	NM_001358	1665	g4557516	8166.92	8592.08	1.05	0.98	1.13	425.16	1.118	0.333991	8166.92	8886.03	1.09	1.03	1.15	719.12	2.589	0.060083	8425.19	8264.64	7961.35	8016.49	9233.76	9213.04	7979.52	7942	9626.16	8823.21	8504.69	8590.06
201386_s_at	DHX15: DEAH (Asp-Glu-Ala-His) box polypeptide 15	AF279891	1665	g9624452	3960.54	4380.42	1.11	1	1.22	419.88	1.609	0.200829	3960.54	4290.76	1.08	1.05	1.12	330.22	3.701	0.014887	4085.86	3872.27	3946.48	3937.56	4744.79	4888.82	4046.8	3841.26	4081.41	4453.02	4317.78	4310.82
201388_at	PSMD3: proteasome (prosome, macropain) 26S subunit, non-ATPase, 3	NM_002809	5709	g4506228	1997.46	1945.73	-1.03	-0.82	-1.25	-51.72	-0.203	0.849269	1997.46	1921.06	-1.04	-0.83	-1.26	-76.39	-0.309	0.774829	2218.4	1286.94	2243.28	2241.2	1779.94	1849.26	2208.7	1945.03	1817.73	1908.87	1830.85	2126.81
201389_at	ITGA5: integrin, alpha 5 (fibronectin receptor, alpha polypeptide)	NM_002205	3678	g4504750	201.23	171.18	-1.18	-1.02	-1.34	-30.05	-1.858	0.129504	201.23	173.68	-1.16	-0.98	-1.37	-27.55	-1.43	0.203427	225.52	226.89	175.77	176.73	189.09	163.05	176.42	156.16	210.14	153.5	158.92	172.16
201390_s_at	CSNK2B: casein kinase 2, beta polypeptide	NM_001320	1460	g10334850	5794.46	5119.19	-1.13	-0.99	-1.31	-675.26	-1.57	0.213715	5794.46	5535.75	-1.05	-0.99	-1.11	-258.71	-1.436	0.242583	5829.49	5712.66	5822.54	5813.13	5893.27	5830.91	4402.32	4350.27	5600.65	5016.08	5725.87	5800.39
201391_at	TRAP1: TNF receptor-associated protein 1	NM_016292	10131	g7706484	3072.1	2301.8	-1.33	-1.15	-1.58	-770.3	-3.496	0.038198	3072.1	2911.21	-1.06	-0.99	-1.12	-160.89	-1.478	0.228186	3119.57	3020.49	3045.21	3103.12	1843.82	2011.67	2708.45	2643.24	2860.32	2645.57	2990.66	3148.26
201392_s_at	IGF2R: insulin-like growth factor 2 receptor	BG031974	3482	Hs.76473.0	2220.67	2412.96	1.09	0.88	1.31	192.29	0.675	0.53341	2220.67	2501.27	1.13	0.96	1.31	280.6	1.243	0.266599	2507.13	2356.79	2000.96	2017.78	2941.38	2736.44	1853.18	2120.85	2881.25	2765.51	2177.6	2180.71
201393_s_at	IGF2R: insulin-like growth factor 2 receptor	NM_000876	3482	g4504610	3475.69	3400.24	-1.02	-0.93	-1.13	-75.44	-0.385	0.714781	3475.69	3616.32	1.04	0.94	1.15	140.63	0.632	0.556323	3728.45	3596.8	3290.35	3287.15	3701.67	3648.18	3188.55	3062.56	3440.51	4186.73	3342.37	3495.66
201394_s_at	RBM5: RNA binding motif protein 5	U23946	10181	g1244403	618.63	880.14	1.42	1.23	1.63	261.51	3.757	0.018476	618.63	717.69	1.16	0.99	1.35	99.06	1.529	0.1953	588.94	553.76	675.33	656.48	1015.28	957.25	802.93	745.08	556.24	712.78	781.73	820
201395_at	RBM5: RNA binding motif protein 5	NM_005778	10181	g5032030	1556.33	2035.56	1.31	1.17	1.45	479.22	3.789	0.02514	1556.33	1890.19	1.21	1.13	1.31	333.86	4.035	0.014602	1585.54	1458.5	1610.62	1570.66	2200.57	2275.71	1908.4	1757.55	1711.21	1856.26	1916.89	2076.39
201396_s_at	SGTA: small glutamine-rich tetratricopeptide repeat (TPR)-containing, alpha	NM_003021	6449	g13259553	347.35	418.52	1.2	1.07	1.35	71.17	2.452	0.061659	347.35	467.66	1.35	1.08	1.63	120.31	2.138	0.111737	373.26	308.23	357.85	350.05	462.48	456.52	400.52	354.55	623.9	458.56	407.79	380.39
201397_at	PHGDH: phosphoglycerate dehydrogenase	NM_006623	26227	g5729973	2988.21	2649.37	-1.13	-0.87	-1.56	-338.83	-0.735	0.506226	2988.21	4769.19	1.6	1.42	1.79	1780.98	6.441	0.001181	2855.7	2678.87	3029.79	3388.47	1896.96	1912.73	3567.25	3220.56	4912.36	4089.79	4946.65	5127.95
201398_s_at	TRAM1: translocation associated membrane protein 1	BC000687	23471	g12653796	5293.75	6135.77	1.16	1.03	1.29	842.02	2.067	0.102981	5293.75	5125.24	-1.03	-0.93	-1.15	-168.51	-0.515	0.627959	5799.57	5136.52	5228.03	5010.87	6781.05	6753.36	5628.6	5380.05	4694.2	4603.2	5551.73	5651.84
201399_s_at	TRAM1: translocation associated membrane protein 1	NM_014294	23471	g7657654	1285.62	1593.16	1.24	0.97	1.51	307.54	1.459	0.238219	1285.62	923.13	-1.39	-1.15	-1.76	-362.49	-3.051	0.049331	1327.08	1286.86	1313.62	1214.91	2083.99	1792.93	1304.2	1191.52	582.33	978.32	1035.22	1096.64
201400_at	PSMB3: proteasome (prosome, macropain) subunit, beta type, 3	NM_002795	5691	g4506196	7670.69	7748.11	1.01	0.95	1.07	77.42	0.289	0.788034	7670.69	7062.9	-1.09	-1.04	-1.14	-607.79	-3.048	0.035412	7669.22	7583.45	7524.49	7905.6	8193.93	8177.77	7375.44	7245.31	6557.52	7227.44	7071.58	7395.05
201401_s_at	ADRBK1: adrenergic, beta, receptor kinase 1	M80776	156	g179334	151.24	133.31	-1.13	-0.89	-1.52	-17.92	-0.814	0.456626	151.24	148.16	-1.02	-0.9	-1.15	-3.08	-0.273	0.797348	160.61	123.68	149.58	171.08	110.94	90.99	155.74	175.58	143.15	155.9	156.51	137.09
201403_s_at	MGST3: microsomal glutathione S-transferase 3	NM_004528	4259	g4758713	2443.69	2989.33	1.22	1.03	1.42	545.64	1.87	0.151434	2443.69	2900.92	1.19	1.13	1.25	457.23	5.552	0.001451	2485.57	2449.38	2285.37	2554.43	3405.6	3557.81	2521.22	2472.68	2733.05	2955.16	2909.22	3006.25
201404_x_at	PSMB2: proteasome (prosome, macropain) subunit, beta type, 2	BC000268	5690	g12653014	323.74	287.92	-1.12	-1.01	-1.25	-35.82	-1.852	0.114141	323.74	293.11	-1.1	-0.96	-1.28	-30.63	-1.163	0.29556	327.41	351.01	333.55	282.99	308.16	287.72	304.01	251.79	239.8	274.39	332.86	325.37
201405_s_at	COPS6: COP9 constitutive photomorphogenic homolog subunit 6 (Arabidopsis)	NM_006833	10980	g5803095	2700.46	2214.78	-1.22	-1.17	-1.27	-485.68	-8.76	0.000379	2700.46	2657.73	-1.02	-0.93	-1.12	-42.73	-0.28	0.796842	2753.85	2689.38	2626.66	2731.94	2096.54	2199.57	2234.82	2328.18	3033.76	2763.44	2384	2449.74
201406_at	LOC729362 /// RPL36A: ribosomal protein L36a /// similar to large subunit ribosomal protein L36a	NM_021029	6173 /// 729362	g10445222	15256	15825.8	1.04	1.01	1.07	569.78	2.07	0.10748	15256	15805.3	1.04	0.92	1.16	549.32	0.49	0.654576	15990.6	15207.7	14900.9	14924.7	15721.6	15644.5	15815.8	16121.1	12627.5	16120.5	17230.2	17242.9
201407_s_at	PPP1CB: protein phosphatase 1, catalytic subunit, beta isoform	AI186712	5500	Hs.21537.0	3664.25	3785.75	1.03	0.97	1.1	121.49	0.817	0.460843	3664.25	3994.75	1.09	0.97	1.21	330.5	1.24	0.296543	3593.92	3573.35	3815.63	3674.11	4117.13	3904.49	3514.86	3606.5	3540.38	3551.88	4369.68	4517.07
201408_at	PPP1CB: protein phosphatase 1, catalytic subunit, beta isoform	W67887	5500	Hs.21537.0	973.3	900.91	-1.08	-0.83	-1.52	-72.39	-0.442	0.682448	973.3	794.35	-1.23	-0.99	-1.56	-178.96	-1.579	0.177502	1108.62	1022.3	901.5	860.78	1207.21	1123.21	650.28	622.96	528.04	765.16	934.48	949.71
201409_s_at	PPP1CB: protein phosphatase 1, catalytic subunit, beta isoform	NM_002709	5500	g4506004	1529.55	1555.01	1.02	0.92	1.11	25.45	0.292	0.786384	1529.55	1529.64	1	0.89	1.12	0.08	0.001	0.999429	1547.31	1506	1592.07	1472.83	1753.93	1630.82	1422.76	1412.51	1460.86	1309.57	1806.86	1541.27
201410_at	PLEKHB2: pleckstrin homology domain containing, family B (evectins) member 2	AI983043	55041	Hs.246885.0	4283.36	4356.8	1.02	0.99	1.04	73.45	1.127	0.316813	4283.36	4070.66	-1.05	-1.01	-1.09	-212.69	-2.19	0.10111	4252.36	4272.35	4239.24	4369.47	4450.05	4353.97	4193.84	4429.36	4092.12	4163.08	4222.54	3804.9
201411_s_at	PLEKHB2: pleckstrin homology domain containing, family B (evectins) member 2	NM_017958	55041	g8923679	1455.04	1569.54	1.08	0.98	1.18	114.5	1.371	0.241769	1455.04	1384.95	-1.05	-0.96	-1.15	-70.09	-0.918	0.407784	1358.05	1490.8	1485.96	1485.35	1682.17	1722.04	1433.42	1440.52	1261.13	1280.47	1448.43	1549.76
201412_at	LRP10: low density lipoprotein receptor-related protein 10	NM_014045	26020	g13027587	620.42	875.65	1.41	1.19	1.64	255.23	3.086	0.046165	620.42	594.36	-1.04	-0.95	-1.15	-26.07	-0.752	0.483553	659.1	647.12	602.54	572.92	718.82	755.96	1005.35	1022.46	542.72	552.05	660.84	621.81
201413_at	HSD17B4: hydroxysteroid (17-beta) dehydrogenase 4	NM_000414	3295	g4504504	2267.23	2880.21	1.27	1.09	1.46	612.98	2.462	0.082776	2267.23	2669.13	1.18	1.04	1.32	401.89	2.152	0.10614	2425.9	2257.48	2194.19	2191.37	3281.88	3312.62	2537.8	2388.54	2574.26	2203.98	2956.61	2941.67
201414_s_at	NAP1L4: nucleosome assembly protein 1-like 4	NM_005969	4676	g5174612	1986.09	2076.78	1.05	0.82	1.27	90.69	0.339	0.756806	1986.09	1812.63	-1.1	-0.86	-1.51	-173.46	-0.576	0.604464	1974.92	1960.49	2043.89	1965.04	2524.23	2552.16	1577.65	1653.08	2398.8	2262.21	1283.84	1305.69
201415_at	GSS: glutathione synthetase	NM_000178	2937	g4504168	748.95	718.24	-1.04	-0.91	-1.22	-30.71	-0.479	0.657888	748.95	662.09	-1.13	-1.02	-1.26	-86.86	-1.942	0.110506	812.33	752.33	706.28	724.87	599.04	632.91	836.95	804.08	745.32	708.11	588.15	606.77
201416_at	SOX4: SRY (sex determining region Y)-box 4	BG528420	6659	Hs.83484.0	5694.5	5130.11	-1.11	-0.88	-1.47	-564.39	-0.717	0.517862	5694.5	4606.27	-1.24	-1.09	-1.41	-1088.24	-2.848	0.03274	5644.18	5122.13	5824.33	6187.37	6687.79	6160.15	3847.6	3824.89	5338.63	4906.4	4056.53	4123.52
201417_at	SOX4: SRY (sex determining region Y)-box 4	AL136179	6659	Hs.83484.0	9148.53	8208.24	-1.11	-0.96	-1.32	-940.29	-1.185	0.309886	9148.53	7323.19	-1.25	-1.16	-1.36	-1825.34	-4.808	0.003762	8726.83	8794.99	9556.84	9515.46	9559.92	9486.82	7018.77	6767.43	7376.4	8161.12	6769.98	6985.28
201418_s_at	SOX4: SRY (sex determining region Y)-box 4	NM_003107	6659	g4507162	2104.93	1899.25	-1.11	-0.88	-1.48	-205.69	-0.688	0.53	2104.93	1659.07	-1.27	-1.1	-1.48	-445.86	-2.718	0.035258	1877.1	1964.23	2257.51	2320.89	2358.1	2403.94	1410.37	1424.57	1897.54	1821.27	1364.32	1553.15
201419_at	BAP1: BRCA1 associated protein-1 (ubiquitin carboxy-terminal hydrolase)	NM_004656	8314	g4757835	1581.77	1668.22	1.05	1.01	1.1	86.45	1.929	0.107027	1581.77	1593.43	1.01	0.89	1.13	11.66	0.101	0.925333	1522.66	1647.78	1590.75	1565.9	1660.64	1756.45	1677.05	1578.74	1504.92	1322.16	1720.88	1825.76
201420_s_at	WDR77: WD repeat domain 77	BF975273	79084	Hs.11039.0	1451.74	980.35	-1.48	-1.35	-1.63	-471.39	-7.933	0.000528	1451.74	1256.36	-1.16	-1.11	-1.21	-195.37	-5.32	0.002988	1421.19	1543.76	1410.11	1431.88	883.09	903.37	1055.77	1079.18	1222.35	1279.65	1299.8	1223.67
201421_s_at	WDR77: WD repeat domain 77	NM_024102	79084	g13129109	1337.47	935.68	-1.43	-1.37	-1.49	-401.79	-17.031	0.000422	1337.47	1230.29	-1.09	-1.05	-1.13	-107.19	-3.809	0.031525	1340.45	1339.11	1336.24	1334.08	943.4	923.07	994.8	881.46	1282.3	1258.31	1152.95	1227.58
201422_at	IFI30: interferon, gamma-inducible protein 30	NM_006332	10437	g5453695	410.99	298.35	-1.38	-1.07	-1.91	-112.64	-2.148	0.10484	410.99	311.87	-1.32	-1.15	-1.53	-99.12	-3.465	0.015923	397.27	371.89	429.06	445.76	199.92	225.64	392.09	375.75	252.51	296.58	352.67	345.73
201423_s_at	CUL4A: cullin 4A	AL037208	8451	Hs.183874.0	1210.67	1253.26	1.04	0.89	1.19	42.59	0.379	0.722586	1210.67	1317.22	1.09	0.99	1.19	106.55	1.507	0.182478	1299.53	1281.12	1175.38	1086.65	1422.35	1432.9	1096.6	1061.21	1250.49	1466.08	1291.99	1260.33
201424_s_at	CUL4A: cullin 4A	NM_003589	8451	g11140810	2722.86	2206.25	-1.23	-1.08	-1.42	-516.61	-2.498	0.048208	2722.86	3077.78	1.13	1.03	1.26	354.92	2.11	0.109658	3181.77	2679.28	2450.01	2580.37	1934.57	2049.1	2331.99	2509.33	2956.06	3136.31	3187.16	3031.6
201426_s_at	VIM: vimentin	AI922599	7431	Hs.297753.0	8210.31	7744.82	-1.06	-0.93	-1.2	-465.49	-0.725	0.500583	8210.31	8221.09	1	0.89	1.13	10.77	0.018	0.986222	9348.14	6736.59	8235.93	8520.59	8598.75	7977.45	7158.94	7244.13	7783.47	7924.25	8589.29	8587.32
201427_s_at	SEPP1: selenoprotein P, plasma, 1	NM_005410	6414	g4885590	101.49	88.47	-1.15	-1.07	-1.23	-13.02	-3.236	0.018568	101.49	120.52	1.19	1.03	1.35	19.03	1.987	0.128583	104.55	102.62	104.89	93.89	85.01	82.78	96.8	89.28	132.24	139.71	109.32	100.8
201429_s_at	PLK1 /// RPL37A: polo-like kinase 1 (Drosophila) /// ribosomal protein L37a	NM_000998	5347 /// 6168	g4506642	19469.8	19648.4	1.01	0.98	1.04	178.58	0.471	0.657278	19469.8	19682.4	1.01	0.99	1.03	212.57	0.976	0.384056	19535.5	20011.1	19203.5	19129	20129.7	20273.4	19147.5	19042.8	19657.6	19461.3	19754.5	19856.1
201432_at	CAT: catalase	NM_001752	847	g4557013	2927.46	3562.98	1.22	1.11	1.33	635.52	3.611	0.01258	2927.46	3315.31	1.13	0.95	1.32	387.86	1.198	0.301735	3204.3	2752.07	2987.81	2765.65	3812.75	3789.82	3384.36	3264.99	2735.61	2839.29	3871.74	3814.61
201433_s_at	PTDSS1: phosphatidylserine synthase 1	NM_014754	9791	g7662646	3128.09	3126.81	-1	-0.89	-1.14	-1.29	-0.006	0.995793	3128.09	3360.13	1.07	1.01	1.14	232.04	1.883	0.112832	3319.24	3000.72	3165.61	3026.81	2815.32	2700.74	3563.67	3427.5	3310.97	3132.39	3386.51	3610.65
201434_at	TTC1: tetratricopeptide repeat domain 1	NM_003314	7265	g4507710	1483.59	1547.95	1.04	0.96	1.13	64.36	0.847	0.429684	1483.59	1462.46	-1.01	-0.95	-1.08	-21.12	-0.371	0.731336	1423.08	1365.3	1545.59	1600.37	1468.71	1445.89	1661.89	1615.3	1411.3	1493.31	1469.37	1475.88
201435_s_at	EIF4E: eukaryotic translation initiation factor 4E	AW268640	1977	Hs.79306.0	2474.41	2486.32	1	0.91	1.11	11.92	0.079	0.940534	2474.41	2070.97	-1.19	-0.99	-1.49	-403.44	-1.588	0.196127	2339.35	2663.77	2522.45	2372.06	2774.43	2640.49	2219.54	2310.83	1398.67	2043.41	2492.05	2349.74
201436_at	EIF4E: eukaryotic translation initiation factor 4E	AI742789	1977	Hs.79306.0	556.39	422.17	-1.32	-1.11	-1.58	-134.22	-2.721	0.034777	556.39	555.89	-1	-0.8	-1.31	-0.49	-0.006	0.995527	514.93	498.14	648.24	564.24	475.29	490.58	342.56	380.25	405.89	444	685.83	687.84
201437_s_at	EIF4E: eukaryotic translation initiation factor 4E	NM_001968	1977	g4503534	2101.05	1951.11	-1.08	-0.95	-1.23	-149.94	-0.978	0.385255	2101.05	2052.23	-1.02	-0.94	-1.12	-48.82	-0.431	0.685643	2260.85	2024.88	2082.79	2035.68	1531	2155.8	2011.86	2105.78	1893.04	1910.66	2319.77	2085.44
201439_at	GBF1: golgi-specific brefeldin A resistance factor 1	NM_004193	8729	g4758415	242.87	286.96	1.18	1.05	1.32	44.09	2.383	0.056576	242.87	304.67	1.25	1.08	1.45	61.8	2.379	0.070337	268.46	250.27	239.46	213.28	260.19	269.09	324.74	293.81	373.4	289.16	270.36	285.74
201440_at	DDX23: DEAD (Asp-Glu-Ala-Asp) box polypeptide 23	NM_004818	9416	g4759277	1428.49	1213.14	-1.18	-1.09	-1.27	-215.35	-3.635	0.013251	1428.49	1614.28	1.13	1.04	1.23	185.79	2.321	0.06234	1437.38	1562.12	1346.88	1367.58	1146.62	1301.13	1175.74	1229.05	1548.91	1481.28	1654.54	1772.39
201441_at	COX6B1: cytochrome c oxidase subunit Vib polypeptide 1 (ubiquitous)	NM_001863	1340	g6680989	6766.59	7786.9	1.15	1.08	1.22	1020.31	3.473	0.034138	6766.59	6918.58	1.02	0.98	1.06	151.99	0.88	0.42827	6820.84	6662.13	6651.13	6932.26	8372.33	8182.87	7287.77	7304.63	6500.83	6897.47	7010.56	7265.47
201443_s_at	ATP6AP2: ATPase, H+ transporting, lysosomal accessory protein 2	AF248966	10159	g12005668	2962.22	3544.52	1.2	1.05	1.37	582.3	2.192	0.074675	2962.22	3275.19	1.11	0.99	1.24	312.97	1.501	0.185209	3165.3	2490.78	3113.12	3079.7	3173.91	3186.51	3820.41	3997.25	2931.32	3343.29	3587.69	3238.47
201444_s_at	ATP6AP2: ATPase, H+ transporting, lysosomal accessory protein 2	NM_005765	10159	g5031590	1413.16	1688.65	1.19	1.13	1.26	275.49	5.066	0.013676	1413.16	1340.12	-1.05	-0.86	-1.37	-73.04	-0.388	0.723964	1398.27	1423.19	1427.09	1404.08	1612.12	1594.85	1720.3	1827.32	783.74	1439.87	1593.67	1543.2
201446_s_at	TIA1: TIA1 cytotoxic granule-associated RNA binding protein	BF692742	7072	Hs.239489.0	930.38	1074.34	1.15	0.97	1.4	143.95	1.37	0.238218	930.38	987.71	1.06	0.85	1.33	57.33	0.443	0.673407	718.34	823.61	1112.77	1066.81	949.19	1157.69	1115.69	1074.77	762.61	941.81	1082.93	1163.49
201447_at	TIA1: TIA1 cytotoxic granule-associated RNA binding protein	H96549	7072	Hs.239489.0	447.71	474.83	1.06	1.01	1.11	27.12	1.936	0.145563	447.71	461.46	1.03	0.94	1.13	13.74	0.535	0.629544	444.48	450.35	450.98	445.05	450.42	454.6	484.57	509.75	430.14	413.77	528.45	473.48
201448_at	TIA1: TIA1 cytotoxic granule-associated RNA binding protein	AL046419	7072	Hs.239489.0	1395.18	1382.14	-1.01	-0.95	-1.08	-13.04	-0.243	0.815968	1395.18	1283.93	-1.09	-0.98	-1.22	-111.25	-1.283	0.265713	1377.7	1365.45	1499.9	1337.68	1301.36	1326.44	1457.16	1443.59	1080.88	1237.46	1399.03	1418.34
201449_at	TIA1: TIA1 cytotoxic granule-associated RNA binding protein	AL567227	7072	Hs.239489.0	1273.14	1270.02	-1	-0.89	-1.15	-3.12	-0.031	0.976612	1273.14	1335.24	1.05	0.97	1.13	62.1	0.982	0.370393	1299.41	1223.79	1357.16	1212.21	1463.39	1397.41	1119.06	1100.23	1262.17	1225.58	1422.76	1430.45
201450_s_at	TIA1: TIA1 cytotoxic granule-associated RNA binding protein	NM_022037	7072	g11863160	883.07	1050.68	1.19	1.06	1.33	167.61	2.413	0.065371	883.07	976.49	1.11	0.92	1.3	93.42	0.923	0.412374	842.59	816.72	958.85	914.12	947.74	951.69	1198.3	1104.99	759.38	873.96	1109.45	1163.19
201452_at	RHEB: Ras homolog enriched in brain	AW138374	6009	Hs.279903.0	44.76	43.61	-1.03	-0.86	-1.26	-1.16	-0.228	0.829664	44.76	40.55	-1.1	-0.9	-1.4	-4.21	-0.774	0.478236	43.73	42.55	51.89	40.89	45.63	53.67	43.02	32.1	26.11	47.29	44.81	43.99
201453_x_at	RHEB: Ras homolog enriched in brain	NM_005614	6009	g5032040	5329.42	5769.33	1.08	1.01	1.17	439.91	1.823	0.156001	5329.42	5857.46	1.1	1.01	1.2	528.04	1.852	0.119552	5741.89	5725.82	4975.95	4874.03	5709.44	5939.21	5691.39	5737.29	5372.15	6013.48	6053.35	5990.88
201454_s_at	NPEPPS: aminopeptidase puromycin sensitive	AW055008	9520	Hs.293007.0	1218.61	1609.11	1.32	1.23	1.42	390.5	5.664	0.007486	1218.61	1482.97	1.22	0.94	1.5	264.37	1.283	0.288482	1250.29	1170.04	1240.62	1213.48	1734.84	1712.93	1505.05	1483.6	1114.34	1140.75	1847.57	1829.22
201455_s_at	NPEPPS: aminopeptidase puromycin sensitive	AJ132583	9520	Hs.293007.0	842.09	927.6	1.1	1.03	1.18	85.51	2.268	0.066799	842.09	1100.65	1.31	1.09	1.53	258.56	2.291	0.098896	903	801.35	851.3	812.7	902.44	1014.4	878.39	915.17	974.91	858.13	1330.27	1239.27
201456_s_at	BUB3: BUB3 budding uninhibited by benzimidazoles 3 homolog (yeast)	AU160695	9184	Hs.40323.0	3198.23	3586.68	1.12	0.92	1.44	388.45	0.899	0.432238	3198.23	3809.27	1.19	0.95	1.56	611.04	1.233	0.273954	3216.35	1986.87	3871.73	3717.97	3760.68	3580.89	3538.48	3466.66	3975.71	4441.06	3340.7	3479.6
201457_x_at	BUB3: BUB3 budding uninhibited by benzimidazoles 3 homolog (yeast)	AF081496	9184	g3639059	6013.91	6558.13	1.09	1.06	1.12	544.23	5.653	0.003306	6013.91	5447.05	-1.1	-1.01	-1.21	-566.86	-1.889	0.141556	5807.97	6123.96	5942.99	6180.71	6556.88	6480.04	6512.33	6683.28	4846.19	6228.73	5408.14	5305.14
201458_s_at	BUB3: BUB3 budding uninhibited by benzimidazoles 3 homolog (yeast)	NM_004725	9184	g4757879	4007.79	4226.56	1.05	0.96	1.16	218.77	0.959	0.402721	4007.79	5209.78	1.3	1.08	1.54	1201.99	2.268	0.082259	3739.85	3546.21	4523.27	4221.82	4122.24	4273.42	4336.56	4174	6186.94	5861.78	4578.74	4211.66
201459_at	RUVBL2: RuvB-like 2 (E. coli)	NM_006666	10856	g5730022	5391.02	5120.47	-1.05	-0.97	-1.15	-270.55	-1.038	0.375138	5391.02	5172.41	-1.04	-1.01	-1.08	-218.61	-1.886	0.153982	5367.89	5416.4	5375.73	5404.07	5448.08	5669.53	4582.47	4781.8	5423.81	4916.46	5299.04	5050.31
201460_at	MAPKAPK2: mitogen-activated protein kinase-activated protein kinase 2	AI141802	9261	Hs.75074.0	1349.88	1533.91	1.14	0.91	1.38	184.03	0.995	0.371581	1349.88	1574.84	1.17	0.98	1.38	224.96	1.467	0.201729	1253.12	1171.89	1467.45	1507.06	1838.42	1801.57	1210.68	1284.99	1339.28	1361.07	1812.62	1786.42
201461_s_at	MAPKAPK2: mitogen-activated protein kinase-activated protein kinase 2	NM_004759	9261	g10863900	61.6	74.37	1.21	0.97	1.54	12.77	1.387	0.215923	61.6	74.39	1.21	0.92	1.58	12.79	1.168	0.288415	57.09	43.96	70.61	74.74	89.07	79.22	64.21	64.96	83.38	49.18	84.12	80.89
201462_at	SCRN1: secernin 1	NM_014766	9805	g7661983	729.65	800.37	1.1	1.06	1.13	70.72	4.871	0.011368	729.65	797.19	1.09	0.97	1.22	67.54	1.201	0.306963	736.68	688.94	751.76	741.23	792.44	798.5	811.81	798.73	935.86	830.51	727.16	695.24
201463_s_at	TALDO1: transaldolase 1	NM_006755	6888	g5803186	5032.8	4892.74	-1.03	-0.96	-1.11	-140.06	-0.643	0.563226	5032.8	4998.31	-1.01	-0.93	-1.1	-34.49	-0.138	0.898951	5085.55	5032.35	4922.53	5090.75	4503.64	4561.76	5376.24	5129.3	4406.88	4790.75	5287.22	5508.38
201466_s_at	JUN: jun oncogene	NM_002228	3725	g7710122	65.58	101.82	1.55	0.79	2.34	36.23	1.182	0.320736	65.58	63.06	-1.04	-0.82	-1.39	-2.53	-0.255	0.812196	58.79	62.54	74	67.01	143.71	164.5	50	49.06	67.42	85.04	59.92	39.84
201467_s_at	NQO1: NAD(P)H dehydrogenase, quinone 1	AI039874	1728	Hs.80706.0	113.9	133.59	1.17	0.62	1.73	19.69	0.516	0.64057	113.9	181.14	1.59	0.92	2.27	67.24	1.446	0.242827	114.98	116.72	120.71	103.2	65.4	70.4	200.14	198.44	85.86	119.61	242.01	277.11
201468_s_at	NQO1: NAD(P)H dehydrogenase, quinone 1	NM_000903	1728	g4505414	278.92	322.32	1.16	0.72	1.6	43.41	0.582	0.600903	278.92	550.61	1.97	1.44	2.51	271.69	3.001	0.057146	289.27	275.99	265.8	284.6	184.82	202.92	460.96	440.58	412.66	380.87	666.63	742.26
201469_s_at	SHC1: SHC (Src homology 2 domain containing) transforming protein 1	AI809967	6464	Hs.81972.0	46.88	38.32	-1.22	-0.94	-1.51	-8.55	-1.312	0.274503	46.88	42.23	-1.11	-0.68	-2.36	-4.65	-0.314	0.767865	56.01	28.34	48.57	54.6	40.14	40.96	35.63	36.57	79.5	43.4	24.93	21.06
201470_at	GSTO1: glutathione S-transferase omega 1	NM_004832	9446	g4758483	7348.72	8030.39	1.09	1.06	1.12	681.67	5.29	0.005553	7348.72	7851	1.07	1.03	1.11	502.28	2.793	0.032125	7580.55	7513.04	7091.06	7210.23	7903.44	8148.43	7997.27	8072.42	7533.62	7821.37	8197.55	7851.45
201471_s_at	SQSTM1: sequestosome 1	NM_003900	8878	g4505570	945.61	1269.35	1.34	0.94	1.75	323.74	1.395	0.255816	945.61	1050.54	1.11	0.74	1.49	104.93	0.488	0.658519	1001.42	914.83	960.6	905.58	1707.26	1626.8	823.91	919.41	770.9	601.11	1457.8	1372.35
201472_at	VBP1: von Hippel-Lindau binding protein 1	NM_003372	7411	g9257253	5711.57	5107.83	-1.12	-1.01	-1.26	-603.74	-1.757	0.172916	5711.57	5673.7	-1.01	-0.9	-1.14	-37.87	-0.093	0.931426	5562.84	5732.95	5736.07	5814.41	4475.82	4567.2	5648.67	5739.63	6398.78	6324.12	5147.36	4824.53
201473_at	JUNB: jun B proto-oncogene	NM_002229	3726	g4504808	80.21	81.37	1.01	0.9	1.14	1.16	0.204	0.846481	80.21	89.1	1.11	0.89	1.34	8.89	0.833	0.458422	76.53	85.65	84.51	74.16	75.73	84.13	93.87	71.75	119.7	79.62	81.71	75.39
201474_s_at	ITGA3: integrin, alpha 3 (antigen CD49C, alpha 3 subunit of VLA-3 receptor)	NM_002204	3675	g4504746	35.37	50.69	1.43	1.21	1.75	15.33	3.839	0.023728	35.37	51.99	1.47	1.23	1.81	16.62	3.811	0.014524	41.67	33.14	41.19	25.46	53.78	48.65	49.73	50.61	51.78	46.85	56.99	52.32
201475_x_at	MARS: methionyl-tRNA synthetase	NM_004990	4141	g4826825	2294.64	2308.12	1.01	0.91	1.11	13.48	0.098	0.927167	2294.64	2909.68	1.27	1.11	1.43	615.04	2.823	0.059153	2402.02	2349.06	2187.6	2239.89	2107.09	2130.07	2665.34	2329.98	2486.62	2602.25	3264.24	3285.63
201476_s_at	RRM1: ribonucleotide reductase M1 polypeptide	AI692974	6240	Hs.2934.0	1929.28	1938.58	1	0.9	1.11	9.3	0.074	0.944954	1929.28	1649.17	-1.17	-0.98	-1.45	-280.12	-1.42	0.247185	1902	1890.97	2015.05	1909.1	1756.22	1713.53	2215.39	2069.16	1146.32	2097.69	1646.86	1705.8
201477_s_at	RRM1: ribonucleotide reductase M1 polypeptide	NM_001033	6240	g4506748	7415.27	7069.64	-1.05	-0.96	-1.15	-345.63	-0.914	0.423913	7415.27	7678.65	1.04	0.92	1.15	263.38	0.523	0.63554	7539.28	7412.34	7492.44	7217.02	6516.94	6345.91	7632.03	7783.67	8478.68	8597.19	6910.36	6728.36
201478_s_at	DKC1: dyskeratosis congenita 1, dyskerin	U59151	1736	g2737893	3774.46	3260.82	-1.16	-1.06	-1.26	-513.63	-2.79	0.034339	3774.46	3921.76	1.04	0.91	1.18	147.31	0.492	0.644498	3549.4	3490.59	4008.39	4049.45	3503.29	3388.07	3105	3046.93	3202.12	3917.65	4154.06	4413.22
201479_at	DKC1: dyskeratosis congenita 1, dyskerin	NM_001363	1736	g4503336	5167.32	4698.64	-1.1	-1.01	-1.2	-468.68	-1.879	0.10995	5167.32	5845.62	1.13	1.05	1.21	678.3	2.871	0.028404	5023.85	4765.04	5438.67	5441.73	5032.08	5008.16	4347.93	4406.41	5514.39	5612.33	6040.9	6214.87
201480_s_at	SUPT5H: suppressor of Ty 5 homolog (S. cerevisiae)	NM_003169	6829	g4507312	1398.04	1673.43	1.2	1.1	1.3	275.39	3.495	0.016624	1398.04	1679.11	1.2	1.13	1.28	281.08	5.113	0.002502	1372.87	1287.84	1459.77	1471.66	1782.17	1790.62	1533.68	1587.25	1698.04	1596.54	1660.68	1761.19
201481_s_at	PYGB: phosphorylase, glycogen; brain	NM_002862	5834	g4506350	215.84	247.71	1.15	0.97	1.34	31.88	1.33	0.260451	215.84	249.88	1.16	0.97	1.35	34.04	1.369	0.250327	196.21	212.59	230.45	224.09	275.07	297.44	206.09	212.26	311.73	253.36	197.54	236.9
201482_at	QSOX1: quiescin Q6 sulfhydryl oxidase 1	NM_002826	5768	g13325074	222.74	272.72	1.22	1.16	1.29	49.98	6.569	0.000701	222.74	254.75	1.14	0.87	1.42	32.01	0.871	0.44594	215.79	214.32	225.96	234.9	279.59	284.5	258.04	268.74	184.51	200.66	303.7	330.14
201483_s_at	SUPT4H1: suppressor of Ty 4 homolog 1 (S. cerevisiae)	BC002802	6827	g12803910	2300.02	1876.2	-1.23	-1.02	-1.51	-423.81	-1.836	0.131711	2300.02	1789.36	-1.29	-1.16	-1.42	-510.66	-4.041	0.009773	2264.78	2611.51	2135.94	2187.84	1520.4	1536.43	2130.71	2317.26	1629.91	1845.03	1741.31	1941.19
201484_at	SUPT4H1: suppressor of Ty 4 homolog 1 (S. cerevisiae)	NM_003168	6827	g4507310	1320.78	1028.58	-1.28	-1.01	-1.73	-292.2	-1.742	0.162362	1320.78	1154.89	-1.14	-1.04	-1.26	-165.88	-2.301	0.061907	1447.79	1375.31	1229.96	1230.04	747.1	767.48	1361.24	1238.5	1015.12	1180.69	1204.43	1219.32
201485_s_at	RCN2: reticulocalbin 2, EF-hand calcium binding domain	BC004892	5955	g13436151	1869.96	2385.01	1.28	1.21	1.34	515.05	8.064	0.000205	1869.96	1949.01	1.04	0.81	1.28	79.04	0.301	0.781586	1877.76	1736.96	1958.2	1906.94	2300.11	2328.21	2483.91	2427.82	1332.45	1725.65	2456.43	2281.49
201486_at	RCN2: reticulocalbin 2, EF-hand calcium binding domain	NM_002902	5955	g4506456	3504.69	4044.26	1.15	1.07	1.24	539.57	3.114	0.025618	3504.69	3537.39	1.01	0.91	1.11	32.7	0.153	0.885551	3635.76	3635.63	3509.26	3238.11	3804.77	3799.65	4184.95	4387.68	3188.47	3219.34	3883.49	3858.25
201487_at	CTSC: cathepsin C	NM_001814	1075	g4503140	4365.94	3314.89	-1.32	-1.27	-1.36	-1051.06	-14.694	4.9e-05	4365.94	3777.74	-1.16	-1.05	-1.28	-588.2	-2.625	0.075033	4414.96	4270.52	4365.54	4412.76	3263.7	3208.58	3497.01	3290.24	3284.74	3541.4	4033.06	4251.78
201488_x_at	KHDRBS1: KH domain containing, RNA binding, signal transduction associated 1	BC000717	10657	g12653852	6059.2	5481.25	-1.11	-1.02	-1.19	-577.95	-2.139	0.096955	6059.2	6501.97	1.07	1	1.16	442.77	1.584	0.179615	5622.97	5662.05	6611.86	6339.93	5730.49	5299.92	5599.26	5295.33	6172.4	6666.06	6417.25	6752.18
201489_at	PPIF: peptidylprolyl isomerase F (cyclophilin F)	BC005020	10105	g13477126	2434.96	2581.93	1.06	0.98	1.14	146.97	1.232	0.27991	2434.96	2607.02	1.07	0.99	1.15	172.05	1.53	0.192187	2357.64	2331.47	2515.33	2535.41	2364.91	2439.74	2814.25	2708.84	2683.84	2346.84	2579.99	2817.39
201490_s_at	PPIF: peptidylprolyl isomerase F (cyclophilin F)	NM_005729	10105	g5031986	1095.12	1131.28	1.03	0.93	1.15	36.16	0.503	0.633351	1095.12	887.8	-1.23	-0.95	-1.74	-207.32	-1.277	0.274787	962.77	1055	1149.19	1213.53	1101	1015.53	1182.46	1226.13	437.89	954.94	1073.55	1084.84
201491_at	AHSA1: AHA1, activator of heat shock 90kDa protein ATPase homolog 1 (yeast)	NM_012111	10598	g6912279	3944.72	3936.55	-1	-0.96	-1.05	-8.17	-0.081	0.93843	3944.72	4062.13	1.03	0.97	1.09	117.41	0.795	0.469194	3877.8	3811.91	4002.03	4087.14	3812.29	3790.69	4026.9	4116.31	3873.93	3793.09	4246.29	4335.21
201492_s_at	RPL41: ribosomal protein L41	NM_021104	6171	g10863874	19321.9	19711.7	1.02	1	1.04	389.78	1.447	0.239395	19321.9	19992.2	1.03	1.02	1.04	670.29	5.644	0.005227	19249.3	19262.8	19337.2	19438.4	20109	20099.2	19660.5	18978.2	19895.5	19805.9	19956.8	20310.6
201493_s_at	PUM2: pumilio homolog 2 (Drosophila)	BE778078	23369	Hs.6151.0	1661.15	1718.35	1.03	1	1.07	57.19	1.629	0.192657	1661.15	1610.18	-1.03	-0.97	-1.1	-50.98	-0.797	0.461365	1759.94	1645.68	1635.94	1603.05	1739.91	1700.7	1717.42	1715.37	1502.86	1539	1735.56	1663.3
201494_at	PRCP: prolylcarboxypeptidase (angiotensinase C)	NM_005040	5547	g4826939	1169.5	1150.43	-1.02	-0.9	-1.15	-19.07	-0.225	0.832196	1169.5	1414.78	1.21	1.08	1.35	245.28	2.646	0.05617	1241.92	1212.05	1146.87	1077.16	994.49	1047.95	1309.79	1249.49	1353.47	1201.5	1545.76	1558.39
201498_at	USP7: ubiquitin specific peptidase 7 (herpes virus-associated)	AI160440	7874	Hs.78683.0	4778.36	3833.51	-1.25	-1.12	-1.39	-944.85	-3.653	0.020018	4778.36	4572.66	-1.04	-0.91	-1.23	-205.71	-0.485	0.657443	5030.54	4880.71	4579.37	4622.82	4239.92	4226.94	3321.22	3545.96	5123.52	5425.32	3938.22	3803.56
201499_s_at	USP7: ubiquitin specific peptidase 7 (herpes virus-associated)	NM_003470	7874	g4507856	4051.42	3484.38	-1.16	-1.05	-1.3	-567.04	-2.491	0.067916	4051.42	3852.69	-1.05	-0.94	-1.18	-198.74	-0.746	0.500499	4295.22	3891.56	4008.95	4009.96	3906.82	3781.95	3184.41	3064.34	4276.82	4301.53	3439.67	3392.73
201500_s_at	PPP1R11: protein phosphatase 1, regulatory (inhibitor) subunit 11	NM_021959	6992	g11386174	2454.96	2504.15	1.02	0.92	1.13	49.19	0.314	0.764596	2454.96	2039.32	-1.2	-0.93	-1.7	-415.64	-1.124	0.332267	2671	2589.19	2263.75	2295.9	2321.84	2292.15	2780.73	2621.88	2723.14	2582.32	1425.01	1426.81
201501_s_at	GRSF1: G-rich RNA sequence binding factor 1	NM_002092	2926	g4504160	3250.83	2419.96	-1.34	-1.25	-1.44	-830.87	-6.579	0.001888	3250.83	3722.85	1.15	1.08	1.22	472.02	3.621	0.016159	3540.29	3305.18	3135.37	3022.48	2317.23	2377.76	2582.8	2402.06	3919.57	3658.71	3663.04	3650.09
201502_s_at	NFKBIA: nuclear factor of kappa light polypeptide gene enhancer in B-cells inhibitor, alpha	AI078167	4792	Hs.81328.0	342.3	520.62	1.52	1.34	1.71	178.31	4.802	0.011638	342.3	467.5	1.37	1.1	1.64	125.2	2.254	0.103117	317.78	332.5	352.65	366.29	578.12	585.15	448.45	470.76	341.17	414.25	538.49	576.11
201503_at	G3BP1: GTPase activating protein (SH3 domain) binding protein 1	BG500067	10146	Hs.220689.0	4391.03	4413.11	1.01	0.89	1.12	22.08	0.072	0.94526	4391.03	5182.42	1.18	1.1	1.26	791.39	4.154	0.006698	4625.94	4666.84	4191.95	4079.38	3842	4078.52	4875.21	4856.7	5501.62	5179.26	5113.02	4935.8
201504_s_at	TSN: translin	AI435302	7247	Hs.75066.0	827.02	826.34	-1	-0.88	-1.16	-0.68	-0.01	0.992561	827.02	569.03	-1.45	-1.19	-1.85	-257.99	-3.375	0.032741	841.28	886.35	795	785.46	718.44	714.59	965.86	906.46	354.07	610.6	673.85	637.61
201505_at	LAMB1: laminin, beta 1	NM_002291	3912	g4504950	71.55	72	1.01	0.84	1.18	0.45	0.061	0.954822	71.55	79.41	1.11	0.84	1.39	7.86	0.663	0.551687	74.72	70.55	75.09	65.84	77.59	88.46	66.34	55.61	61.11	57.44	100.06	99.01
201507_at	PFDN1: prefoldin subunit 1	NM_002622	5201	g12408673	1877.95	2282.75	1.22	1.11	1.34	404.79	3.748	0.017749	1877.95	1928	1.03	0.92	1.15	50.05	0.397	0.705337	1711.13	1706.5	2053.19	2041	2386.57	2321.67	2172.59	2250.16	2094.66	2028.29	1760.5	1828.57
201509_at	IDH3B: isocitrate dehydrogenase 3 (NAD+) beta	NM_006899	3420	g5901981	1773.96	1314.4	-1.35	-1.05	-1.89	-459.56	-1.997	0.137504	1773.96	1649.31	-1.08	-1.03	-1.13	-124.65	-2.581	0.048943	1759.8	1845.97	1724.42	1765.64	915.28	922.09	1684.37	1735.85	1766	1575.03	1623.44	1632.78
201510_at	ELF3: E74-like factor 3 (ets domain transcription factor, epithelial-specific )	AF017307	1999	g2338755	22.65	32.14	1.42	1	1.92	9.49	1.626	0.179294	22.65	31.43	1.39	1.19	1.66	8.78	3.677	0.023163	25.66	15.99	24.29	24.66	18.53	38.93	28.68	42.4	31.79	33.28	29.26	31.38
201511_at	AAMP: angio-associated, migratory cell protein	NM_001087	14	g4557228	795.86	759.93	-1.05	-0.96	-1.14	-35.94	-0.918	0.401603	795.86	887.42	1.12	1.02	1.22	91.56	1.928	0.121994	844.88	812.26	766.1	760.22	705.56	697.97	816.94	819.24	825.41	804.21	938.61	981.45
201512_s_at	TOMM70A: translocase of outer mitochondrial membrane 70 homolog A (S. cerevisiae)	BC003633	9868	g13177705	197.99	143.97	-1.38	-1.2	-1.61	-54.03	-3.938	0.011663	197.99	174	-1.14	-1.05	-1.23	-23.99	-2.597	0.041492	189.21	203.83	214.7	184.24	134.68	114.8	161.96	164.43	163.81	191	166.81	174.39
201513_at	TSN: translin	AI659180	7247	Hs.75066.0	947.62	823.86	-1.15	-1.02	-1.29	-123.76	-1.992	0.093559	947.62	877.85	-1.08	-0.94	-1.26	-69.77	-0.879	0.418699	1050.57	958.2	941.08	840.62	746.47	746.17	907.45	895.35	780.22	752.54	1030.01	948.64
201514_s_at	G3BP1: GTPase activating protein (SH3 domain) binding protein 1	NM_005754	10146	g5031702	1251.52	1383.18	1.11	1.02	1.2	131.65	2.081	0.099708	1251.52	1275.62	1.02	0.89	1.16	24.1	0.245	0.815838	1225.92	1387.92	1277.24	1115.02	1378.84	1373.93	1458.08	1321.85	1034.85	1364.92	1335.23	1367.49
201515_s_at	TSN: translin	NM_004622	7247	g4759269	4617.17	4263.91	-1.08	-0.98	-1.21	-353.26	-1.266	0.272311	4617.17	4358.58	-1.06	-1	-1.12	-258.59	-1.638	0.152508	4890.94	4665.73	4561.25	4350.77	3850.43	3794.84	4737.87	4672.51	4086.2	4319.76	4622.56	4405.79
201516_at	SRM: spermidine synthase	NM_003132	6723	g4507208	3474.63	3074.87	-1.13	-1.03	-1.25	-399.76	-2.154	0.114829	3474.63	3833.71	1.1	0.99	1.22	359.08	1.458	0.237951	3512.22	3547.95	3419.25	3419.11	3452.02	3323.97	2753.06	2770.4	4385.75	3196.09	3888.94	3864.07
201517_at	NCBP2: nuclear cap binding protein subunit 2, 20kDa	BC001255	22916	g12654824	3523.75	3655.82	1.04	0.91	1.21	132.08	0.436	0.691838	3523.75	2295.42	-1.54	-1.15	-2.16	-1228.32	-2.528	0.046842	3431.94	2708.14	4042.59	3912.32	3624.29	3610.94	3686.11	3701.95	1503.37	1787.89	2872.47	3017.97
201518_at	CBX1: chromobox homolog 1 (HP1 beta homolog Drosophila )	NM_006807	10951	g5803075	4616.67	4815.95	1.04	0.81	1.28	199.29	0.308	0.776292	4616.67	3938.19	-1.17	-1.08	-1.27	-678.47	-3.255	0.017541	4339.92	4362.07	4900.82	4863.86	5911.19	5898.64	3744.33	3709.66	3591.4	3919.68	4280.13	3961.55
201519_at	TOMM70A: translocase of outer mitochondrial membrane 70 homolog A (S. cerevisiae)	NM_014820	9868	g7662672	1827.02	1565.67	-1.17	-0.98	-1.44	-261.34	-1.435	0.238639	1827.02	1934.29	1.06	1.01	1.11	107.28	2.109	0.082223	1889.71	1775.13	1901.1	1742.13	1182.37	1344.55	1872.49	1863.29	2023.76	1923.36	1911.1	1878.96
201520_s_at	GRSF1: G-rich RNA sequence binding factor 1	BF034561	2926	Hs.79295.0	3001.77	2455.12	-1.22	-1.07	-1.42	-546.65	-2.6	0.071275	3001.77	2479.2	-1.21	-1.12	-1.32	-522.57	-4.004	0.01567	3044.38	3124.71	2899.85	2938.15	2105.55	2098.88	2830.21	2785.84	2142.97	2470.79	2668.27	2634.76
201521_s_at	NCBP2: nuclear cap binding protein subunit 2, 20kDa	NM_007362	22916	g6679063	866.97	885.13	1.02	0.93	1.13	18.16	0.342	0.74685	866.97	472.69	-1.83	-1.56	-2.18	-394.27	-6.435	0.000724	763.97	816.21	923.71	963.97	825.19	863.48	909.36	942.48	361.84	466.12	532.99	529.82
201522_x_at	SNRPN /// SNURF: small nuclear ribonucleoprotein polypeptide N /// SNRPN upstream reading frame	NM_003097	6638 /// 8926	g13027651	3686.52	3870.84	1.05	0.88	1.22	184.32	0.479	0.66365	3686.52	3943.38	1.07	0.94	1.2	256.86	0.872	0.444139	3646.51	3561.14	3777.47	3760.97	4496.45	4562.68	3148.59	3275.66	3542.4	3348.34	4438.34	4444.45
201523_x_at	UBE2N: ubiquitin-conjugating enzyme E2N (UBC13 homolog, yeast)	BE262760	7334	Hs.75355.0	2428.72	1954.86	-1.24	-1.07	-1.46	-473.86	-2.391	0.056723	2428.72	1796.05	-1.35	-0.99	-2.11	-632.67	-1.558	0.202568	2137.67	2324.03	2612.01	2641.18	2296.18	2147.87	1699.08	1676.31	686.23	1837.3	2345.86	2314.81
201524_x_at	UBE2N: ubiquitin-conjugating enzyme E2N (UBC13 homolog, yeast)	NM_003348	7334	g4507792	5245.85	4282.33	-1.23	-1.11	-1.35	-963.53	-3.526	0.013223	5245.85	4570.11	-1.15	-0.99	-1.35	-675.74	-1.544	0.196148	4878.84	5021.34	5552.07	5531.16	4673.19	4616.9	3856.79	3982.43	3605.88	4214.27	5303.81	5156.49
201525_at	APOD: apolipoprotein D	NM_001647	347	g4502162	25.65	22.47	-1.14	-0.91	-1.42	-3.18	-0.986	0.364619	25.65	27.6	1.08	0.78	1.43	1.95	0.404	0.703039	19.79	27.22	31.81	23.76	18.05	27.57	21.59	22.65	39.51	26.51	22.93	21.43
201526_at	ARF5: ADP-ribosylation factor 5	NM_001662	381	g6995999	1245.13	1528.32	1.23	1.12	1.34	283.19	3.508	0.031341	1245.13	1164.97	-1.07	-0.97	-1.18	-80.16	-1.154	0.31885	1252.08	1218.9	1206.72	1302.82	1759.2	1469.04	1466.06	1418.97	1233.06	1315.67	1032.25	1078.88
201527_at	ATP6V1F: ATPase, H+ transporting, lysosomal 14kDa, V1 subunit F	NM_004231	9296	g4757819	3154.23	3847.24	1.22	1.19	1.25	693.01	13.432	1.1e-05	3154.23	3482.22	1.1	0.97	1.24	327.99	1.238	0.300652	3084.21	3118.46	3160.4	3253.84	3750.46	3903.51	3902.47	3832.5	2871.42	3218.07	3922.09	3917.28
201528_at	RPA1: replication protein A1, 70kDa	BG398414	6117	Hs.84318.0	4095.01	2989.62	-1.37	-0.99	-2.22	-1105.39	-1.583	0.2087	4095.01	4097.12	1	0.92	1.08	2.11	0.01	0.992319	4241.3	3848.34	4097.53	4192.87	1770	1810.22	4186.73	4191.55	4436.63	4405.26	3781.96	3764.63
201529_s_at	RPA1: replication protein A1, 70kDa	NM_002945	6117	g4506582	2474.99	1723.29	-1.44	-1.07	-2.18	-751.7	-2.097	0.126032	2474.99	2287.21	-1.08	-0.99	-1.2	-187.78	-1.418	0.245209	2530.31	2421.29	2444.21	2504.16	1133.78	1087.36	2461.66	2210.36	1996.41	2614.18	2195.95	2342.3
201530_x_at	EIF4A1: eukaryotic translation initiation factor 4A, isoform 1	NM_001416	1973	g4503528	10982.1	11281.7	1.03	1	1.05	299.64	1.801	0.132031	10982.1	10996.3	1	0.94	1.07	14.23	0.033	0.975364	10888.7	10661.2	11040	11338.4	11146	11119.5	11408.4	11453	9884.42	10912.6	11472.5	11715.8
201531_at	ZFP36: zinc finger protein 36, C3H type, homolog (mouse)	NM_003407	7538	g4507960	327.29	339.46	1.04	0.92	1.16	12.16	0.529	0.623515	327.29	231.89	-1.41	-1.26	-1.6	-95.4	-5.329	0.002915	351.64	332.07	319.13	306.34	344.1	395.72	299.32	318.7	214.45	272.42	236.32	204.37
201532_at	PSMA3: proteasome (prosome, macropain) subunit, alpha type, 3	NM_002788	5684	g4506182	9019.64	9231.66	1.02	0.99	1.06	212.02	0.994	0.376447	9019.64	8658.68	-1.04	-0.91	-1.21	-360.96	-0.482	0.65876	8809.69	8571.12	9389.22	9308.51	9270.09	9167.84	9050.45	9438.26	6515.32	9661.96	9151.5	9305.92
201533_at	CTNNB1: catenin (cadherin-associated protein), beta 1, 88kDa	NM_001904	1499	g4503130	4191.21	5575.49	1.33	1.25	1.42	1384.28	7.37	0.00032	4191.21	3302.55	-1.27	-1.03	-1.65	-888.66	-1.881	0.142927	4403.36	4437.16	4005.69	3918.62	5685.79	5890.03	5300.89	5425.24	2404.8	2640.53	4131.19	4033.66
201534_s_at	UBL3: ubiquitin-like 3	AF044221	5412	g4105251	534.23	664.73	1.24	1.09	1.4	130.49	2.686	0.059089	534.23	525.57	-1.02	-0.88	-1.2	-8.66	-0.177	0.868543	545.27	573.2	519.99	498.46	757.94	726.74	569.48	604.74	415.65	483.73	611.39	591.51
201535_at	UBL3: ubiquitin-like 3	NM_007106	5412	g6005927	480.68	512.5	1.07	0.95	1.19	31.82	0.941	0.383948	480.68	524.75	1.09	0.9	1.3	44.07	0.773	0.482582	516.29	521.28	441.95	443.2	497.86	582.79	509.21	460.14	443.14	438.19	658.39	559.28
201536_at	DUSP3: dual specificity phosphatase 3 (vaccinia virus phosphatase VH1-related)	AL048503	1845	Hs.181046.0	448.69	432.53	-1.04	-0.79	-1.44	-16.16	-0.21	0.843389	448.69	474.36	1.06	0.85	1.29	25.67	0.432	0.683338	502.76	503.07	388.72	400.23	542.76	564.43	300.94	322	366.78	410.17	560.04	560.47
201537_s_at	DUSP3: dual specificity phosphatase 3 (vaccinia virus phosphatase VH1-related)	BC002682	1845	g12803692	77.43	67.14	-1.15	-1.01	-1.32	-10.29	-1.828	0.119118	77.43	74.55	-1.04	-0.88	-1.25	-2.88	-0.367	0.730514	87.33	70.31	76.79	75.29	55.7	65.06	73.87	73.92	61.15	65.68	79.46	91.92
201538_s_at	DUSP3: dual specificity phosphatase 3 (vaccinia virus phosphatase VH1-related)	NM_004090	1845	g4758207	15.44	22.81	1.48	1.12	2.05	7.37	2.375	0.058042	15.44	13.29	-1.16	-0.77	-1.8	-2.15	-0.609	0.564719	19.29	20.1	11.52	10.85	20.37	19.54	27.85	23.46	18.36	7.85	10.18	16.75
201539_s_at	FHL1: four and a half LIM domains 1	U29538	2273	g2078479	106.3	89.18	-1.19	-1	-1.47	-17.12	-1.648	0.182869	106.3	63.27	-1.68	-1.2	-2.76	-43.03	-2.812	0.061049	105.77	105.53	114.54	99.36	103.56	108.62	75.56	68.98	21.91	61.2	80.87	89.12
201540_at	FHL1: four and a half LIM domains 1	NM_001449	2273	g4503720	2379.76	1714.51	-1.39	-1.16	-1.73	-665.26	-3.198	0.043905	2379.76	1682.77	-1.41	-1.23	-1.67	-696.99	-4.398	0.01603	2507.49	2339.52	2344.32	2327.72	2076.19	2057.57	1376.49	1347.79	1416.83	1428.37	2008.69	1877.21
201541_s_at	ZNHIT1: zinc finger, HIT type 1	NM_006349	10467	g5453616	2066.95	2376.34	1.15	1.11	1.19	309.39	6.131	0.000861	2066.95	1780.34	-1.16	-0.99	-1.41	-286.6	-1.498	0.225155	2170.16	2055.94	2033.01	2008.67	2434.39	2441.35	2309.09	2320.53	1287.81	1688.33	2039.69	2105.54
201542_at	SAR1A: SAR1 gene homolog A (S. cerevisiae)	AY008268	56681	g10445220	3321.93	3202.31	-1.04	-0.77	-1.6	-119.62	-0.174	0.872531	3321.93	2252.01	-1.48	-1.33	-1.66	-1069.93	-6.674	0.001668	3362.79	3418.55	3404.44	3101.96	1991.13	2052.87	4296.2	4469.06	1874.22	2236.3	2553.15	2344.35
201543_s_at	SAR1A: SAR1 gene homolog A (S. cerevisiae)	NM_020150	56681	g9910541	1070.4	1773.61	1.66	1.48	1.88	703.21	8.161	0.000564	1070.4	767.49	-1.39	-1.18	-1.64	-302.91	-3.294	0.019162	900.7	988.29	1194.46	1198.14	1812.66	1872.67	1682.42	1726.67	611.32	846.52	823.56	788.57
201544_x_at	PABPN1: poly(A) binding protein, nuclear 1	BF675004	8106	Hs.117176.0	5988.58	6664.2	1.11	1.07	1.16	675.62	4.455	0.007151	5988.58	6684.49	1.12	1.07	1.17	695.91	3.897	0.015326	6118.32	6056.94	5767.25	6011.82	6629.68	6312.45	6804.99	6909.7	6853.68	6202.24	6868.75	6813.28
201545_s_at	PABPN1: poly(A) binding protein, nuclear 1	NM_004643	8106	g4758875	1363.67	1348.09	-1.01	-0.94	-1.09	-15.58	-0.263	0.805284	1363.67	1444.16	1.06	0.95	1.17	80.49	0.892	0.429715	1415.37	1394.04	1334.58	1310.69	1353.63	1194.04	1412.16	1432.53	1219.11	1403.69	1538.94	1614.88
201546_at	TRIP12: thyroid hormone receptor interactor 12	NM_004238	9320	g10863902	3279.76	3759.98	1.15	1.07	1.23	480.21	3.026	0.032366	3279.76	3167.61	-1.04	-0.98	-1.1	-112.15	-0.964	0.373204	3362.49	3068.37	3409.35	3278.85	3536.47	3549.31	4127.51	3826.62	2945.45	3106.55	3287.56	3330.87
201547_at	JARID1B: jumonji, AT rich interactive domain 1B	AA729218	10765	Hs.143323.0	20.94	15.85	-1.32	-0.75	-2.52	-5.09	-0.83	0.438404	20.94	20.89	-1	-0.64	-1.39	-0.04	-0.009	0.992922	14.97	11.92	29.99	26.87	23.88	19.13	16.43	3.97	20.34	16.42	23.56	23.26
201548_s_at	JARID1B: jumonji, AT rich interactive domain 1B	W02593	10765	Hs.143323.0	552.48	449.65	-1.23	-1.01	-1.53	-102.83	-1.776	0.13701	552.48	365.73	-1.51	-1.35	-1.69	-186.75	-5.565	0.003512	623.7	572.24	529.44	484.55	523.9	537.15	409.79	327.77	343.43	411.8	354.8	352.88
201549_x_at	JARID1B: jumonji, AT rich interactive domain 1B	NM_006618	10765	g5729977	367.13	341.64	-1.07	-0.72	-1.86	-25.49	-0.27	0.79955	367.13	239.98	-1.53	-1.23	-1.85	-127.15	-2.957	0.048171	464.8	405.35	294.79	303.57	481.59	495.05	210.77	179.16	251.99	242.46	261.55	203.9
201550_x_at	ACTG1: actin, gamma 1	NM_001614	71	g11038618	15462.1	16062.4	1.04	1	1.08	600.3	1.778	0.129793	15462.1	16196.7	1.05	1.02	1.08	734.6	2.578	0.041867	15795.4	15049.6	15184.1	15819.2	16564.5	16062.1	16313.1	15309.8	16371.2	15723.3	16038.7	16653.5
201551_s_at	LAMP1: lysosomal-associated membrane protein 1	J03263	3916	g187178	102.24	120.43	1.18	1.03	1.36	18.19	2.091	0.093834	102.24	95.66	-1.07	-0.89	-1.29	-6.58	-0.599	0.57102	87.85	93.65	105.28	122.19	115.37	111.56	130.39	124.42	87.2	78.88	114.87	101.72
201552_at	LAMP1: lysosomal-associated membrane protein 1	NM_005561	3916	g7669500	1748.28	2225.94	1.27	1.14	1.41	477.66	3.591	0.019866	1748.28	2030.83	1.16	0.97	1.36	282.54	1.417	0.237799	1577.68	1782.39	1790.69	1842.37	2076.35	1973.11	2381.57	2472.73	1526.98	1945.37	2351.99	2298.97
201553_s_at	LAMP1: lysosomal-associated membrane protein 1	NM_005561	3916	g7669500	4713.08	5984.08	1.27	1.21	1.33	1271	8.459	0.000162	4713.08	5694.97	1.21	1.09	1.33	981.89	2.982	0.043633	4590.72	4493.26	4760.89	5007.46	5837.76	5811.1	6053.25	6234.19	5011.37	5333.43	6171.54	6263.56
201554_x_at	GYG1: glycogenin 1	NM_004130	2992	g4758491	730.69	646.86	-1.13	-0.94	-1.41	-83.84	-1.042	0.361956	730.69	486.45	-1.5	-1.37	-1.65	-244.25	-7.439	0.000332	763.48	781.66	698.39	679.24	512.7	517.4	798.97	758.37	429.59	507.17	529.61	479.42
201555_at	MCM3: minichromosome maintenance complex component 3	NM_002388	4172	g6631094	3950.53	3600.08	-1.1	-1.05	-1.14	-350.44	-3.828	0.021385	3950.53	3783.08	-1.04	-0.99	-1.1	-167.45	-1.406	0.244089	3963.14	3871.9	3949.58	4017.48	3539.36	3399.72	3807.5	3653.75	3649.5	4127.64	3694.38	3660.79
201556_s_at	VAMP2: vesicle-associated membrane protein 2 (synaptobrevin 2)	BC002737	6844	g12803794	32.18	39.98	1.24	0.99	1.62	7.79	1.601	0.179135	32.18	108.99	3.39	0.79	6.34	76.81	1.509	0.227064	33.97	19.52	39.56	35.7	45.85	36.8	40.31	36.95	260.73	56.75	50.79	67.7
201557_at	VAMP2: vesicle-associated membrane protein 2 (synaptobrevin 2)	NM_014232	6844	g7657674	55.85	46.07	-1.21	-0.99	-1.51	-9.78	-1.56	0.170587	55.85	124.74	2.23	0.53	4.01	68.89	1.186	0.320097	54.02	61.98	44.85	62.56	47.04	32.79	54.63	49.84	298.07	56.61	76.3	67.97
201558_at	RAE1: RAE1 RNA export 1 homolog (S. pombe)	NM_003610	8480	g4506398	3121.18	3375.66	1.08	1.06	1.11	254.48	5.826	0.001573	3121.18	3077.12	-1.01	-0.97	-1.06	-44.05	-0.574	0.593049	3214.98	3042.59	3113.07	3114.07	3301.28	3416.91	3395.88	3388.57	2990.82	3025.55	3279.97	3012.14
201559_s_at	CLIC4: chloride intracellular channel 4	AF109196	25932	g4588523	71.27	77.97	1.09	0.88	1.35	6.7	0.697	0.513513	71.27	69.24	-1.03	-0.87	-1.21	-2.03	-0.284	0.787091	54.39	72.01	81.11	77.56	97.14	82.98	67.08	64.67	57.48	71.9	74.58	73
201560_at	CLIC4: chloride intracellular channel 4	NM_013943	25932	g7330334	1572.81	1613.33	1.03	0.68	1.37	40.52	0.124	0.909155	1572.81	1840.54	1.17	1.12	1.23	267.74	5.317	0.002464	1580.3	1497.77	1640.31	1572.86	2091.88	2257.52	1059.9	1044.01	1937.5	1795.12	1875.57	1753.99
201561_s_at	CLSTN1: calsyntenin 1	NM_014944	22883	g7662373	808.53	1210.69	1.5	1.28	1.72	402.16	3.733	0.030264	808.53	1236	1.53	1.3	1.76	427.47	3.895	0.027069	810.7	858.3	794.96	770.15	1412.39	1367.76	979.11	1083.5	1532.74	1056.92	1258.96	1095.39
201562_s_at	LOC653381 /// SORD: sorbitol dehydrogenase /// similar to Sorbitol dehydrogenase (L-iditol 2-dehydrogenase)	NM_003104	653381 /// 6652	g4507154	1296.3	987.68	-1.31	-1.18	-1.44	-308.61	-4.034	0.026188	1296.3	1310.5	1.01	0.92	1.12	14.21	0.182	0.865984	1159.8	1183.34	1479.75	1362.28	970.86	1010.83	985.86	983.18	1300.77	1269.45	1350.36	1321.42
201563_at	SORD: sorbitol dehydrogenase	L29008	6652	g496077	2355.23	1649.89	-1.43	-1.31	-1.55	-705.35	-6.752	0.001134	2355.23	2510.54	1.07	0.94	1.2	155.3	0.868	0.426557	2193.87	2210.27	2538.61	2478.18	1591.03	1543.46	1790.37	1674.69	2967.07	2278.28	2380.7	2416.1
201564_s_at	FSCN1: fascin homolog 1, actin-bundling protein (Strongylocentrotus purpuratus)	NM_003088	6624	g4507114	30.19	32.75	1.08	0.57	1.9	2.56	0.238	0.820726	30.19	29.98	-1.01	-0.62	-1.54	-0.21	-0.026	0.98011	29.56	16.57	47.33	27.3	53.86	40.04	19.88	17.23	39.49	36.22	19.59	24.63
201565_s_at	ID2: inhibitor of DNA binding 2, dominant negative helix-loop-helix protein	NM_002166	3398	g4504570	270.21	543.04	2.01	1.56	2.55	272.83	4.052	0.016485	270.21	773.34	2.86	1.37	4.48	503.13	2.065	0.129074	249.97	211.78	317.5	301.59	659.65	642.85	420.86	448.79	1152.16	1232.26	365.01	343.91
201566_x_at	ID2 /// ID2B: inhibitor of DNA binding 2, dominant negative helix-loop-helix protein /// inhibitor of DNA binding 2B, dominant negative helix-loop-helix protein	D13891	3398 /// 84099	g464183	84.68	161.59	1.91	1.48	2.41	76.91	3.704	0.022888	84.68	227.06	2.68	1.17	4.3	142.38	1.832	0.162844	76.34	70.1	101.75	90.51	194.52	195.92	132.47	123.44	349.15	372.57	93.04	93.46
201567_s_at	GOLGA4: golgi autoantigen, golgin subfamily a, 4	NM_002078	2803	g6715599	1552.43	2084.13	1.34	1.16	1.54	531.7	3.21	0.028021	1552.43	1743.94	1.12	0.84	1.42	191.51	0.709	0.522461	1650.04	1685.06	1520.39	1354.22	2213.21	2439.66	1815.38	1868.26	2134.16	2227.4	1447.48	1166.73
201568_at	UQCRQ: ubiquinol-cytochrome c reductase, complex III subunit VII, 9.5kDa	NM_014402	27089	g7657485	7744.82	9050.11	1.17	1.07	1.26	1305.29	2.921	0.055172	7744.82	8108.79	1.05	1	1.09	363.97	1.836	0.130923	7754.07	7803.34	7488.04	7933.82	9561.25	10011.1	8208.86	8419.26	8208.12	7626.49	8141.41	8459.13
201569_s_at	SAMM50: sorting and assembly machinery component 50 homolog (S. cerevisiae)	NM_015380	25813	g7661541	1983.61	1870.31	-1.06	-0.99	-1.13	-113.3	-1.441	0.220842	1983.61	1730.83	-1.15	-1.06	-1.24	-252.78	-2.838	0.032671	1931.11	1805.02	2117.68	2080.63	1880.76	1954.32	1839.08	1807.08	1643.4	1663.37	1741.38	1875.19
201570_at	SAMM50: sorting and assembly machinery component 50 homolog (S. cerevisiae)	NM_015380	25813	g7661541	2565.97	2547.01	-1.01	-0.95	-1.07	-18.97	-0.195	0.851713	2565.97	2266.97	-1.13	-1.07	-1.2	-299	-3.319	0.019707	2446.25	2440.02	2629.13	2748.49	2650.84	2494.39	2397.68	2645.11	2269.24	2148.56	2257.58	2392.51
201571_s_at	DCTD: dCMP deaminase	AI656493	1635	Hs.76894.0	886.71	856.05	-1.04	-0.88	-1.25	-30.66	-0.333	0.758289	886.71	772.26	-1.15	-0.99	-1.37	-114.45	-1.475	0.220201	861.47	830.32	939.14	915.92	681.87	727.9	976.51	1037.91	557	803.76	846.78	881.5
201572_x_at	DCTD: dCMP deaminase	NM_001921	1635	g4503276	2768.34	2622.17	-1.06	-0.87	-1.33	-146.17	-0.438	0.68853	2768.34	2730.39	-1.01	-0.92	-1.12	-37.95	-0.24	0.820725	2871.75	2553.43	2884.73	2763.44	2103.3	2032.14	3041.75	3311.49	2441.51	2557.01	3032.37	2890.67
201573_s_at	ETF1: eukaryotic translation termination factor 1	M75715	2107	g338686	2378.2	2235.62	-1.06	-0.78	-1.66	-142.57	-0.29	0.790398	2378.2	2711.81	1.14	1.03	1.26	333.61	2.08	0.104134	2194.63	2437.86	2488.39	2391.91	1382.81	1397.63	3087	3075.03	2959.06	2959.2	2379.92	2549.05
201574_at	ETF1: eukaryotic translation termination factor 1	NM_004730	2107	g4759033	5261.38	4860.96	-1.08	-1.04	-1.13	-400.41	-3.4	0.019691	5261.38	5498.89	1.05	0.97	1.12	237.51	1.026	0.371362	5281.4	5083.86	5334.65	5345.61	4722.18	4685.53	5124.43	4911.72	5020.71	5255.2	6017.44	5702.22
201575_at	SNW1: SNW domain containing 1	NM_012245	22938	g6912675	3556	3622.38	1.02	0.87	1.17	66.38	0.208	0.848298	3556	3493.53	-1.02	-0.85	-1.26	-62.47	-0.153	0.888101	3564.48	3565.01	3560.33	3534.18	4255.29	4084.81	3034.3	3115.11	4172.03	4227.93	2757.45	2816.73
201576_s_at	GLB1: galactosidase, beta 1	NM_000404	2720	g10834965	1030.01	1216.56	1.18	1.12	1.24	186.55	5.046	0.00648	1030.01	1108.75	1.08	0.9	1.25	78.74	0.715	0.524345	1068.53	1039.08	1000.01	1012.42	1258.17	1158.54	1289.57	1159.98	988.77	861.9	1286.88	1297.44
201577_at	NME1: non-metastatic cells 1, protein (NM23A) expressed in	NM_000269	4830	g4557796	8355.82	8072.44	-1.04	-0.99	-1.09	-283.38	-1.157	0.309693	8355.82	8258.09	-1.01	-0.94	-1.1	-97.73	-0.239	0.825102	8404.27	8110.37	8318.62	8590.01	8389.39	8524.94	7683.06	7692.36	7147.23	8429.94	8421.01	9034.19
201578_at	PODXL: podocalyxin-like	NM_005397	5420	g4885556	155.43	167.74	1.08	0.86	1.36	12.31	0.556	0.598418	155.43	153.02	-1.02	-0.77	-1.36	-2.41	-0.093	0.92874	135.52	127.95	200.23	158	189.89	192.58	160.17	128.32	114.27	123.17	181.57	193.07
201579_at	FAT: FAT tumor suppressor homolog 1 (Drosophila)	NM_005245	2195	g4885228	4177.45	3773.73	-1.11	-0.97	-1.28	-403.71	-1.283	0.266349	4177.45	4844.63	1.16	0.81	1.52	667.19	0.745	0.508371	4175.6	3814.87	4367.2	4352.11	4184.19	4350.99	3266.24	3293.51	6458.19	6296.62	3217.73	3405.98
201580_s_at	TXNDC13: thioredoxin domain containing 13	AL544094	56255	Hs.169358.0	459.92	701.99	1.53	1.42	1.64	242.07	7.921	0.003636	459.92	470.08	1.02	0.88	1.16	10.16	0.26	0.811539	465.97	447.88	459.68	466.14	761.9	746.2	653.21	646.64	370.06	448.49	542.73	519.04
201581_at	TXNDC13: thioredoxin domain containing 13	BF572868	56255	Hs.169358.0	1664.08	2010.71	1.21	1.09	1.33	346.63	2.868	0.059995	1664.08	1741.89	1.05	1.01	1.08	77.81	2.223	0.072671	1689.55	1626.9	1707.6	1632.29	2142.32	2278.79	1785.64	1836.07	1691.16	1710.81	1820.7	1744.9
201582_at	SEC23B: Sec23 homolog B (S. cerevisiae)	AL121900	10483	Hs.173497.0	165.53	176.68	1.07	0.98	1.17	11.14	1.189	0.284956	165.53	206.16	1.25	1.1	1.4	40.62	2.966	0.029101	151.7	161.43	187.72	161.29	188.83	179.55	174.97	163.37	209.51	182.56	235.77	196.8
201583_s_at	SEC23B: Sec23 homolog B (S. cerevisiae)	NM_006363	10483	g5454043	529.43	662.97	1.25	1.19	1.31	133.54	7.108	0.002949	529.43	550.67	1.04	0.91	1.17	21.23	0.521	0.637321	517.53	523.64	544.51	532.06	704.39	663.91	666.42	617.17	476.8	491.05	646.01	588.81
201584_s_at	DDX39: DEAD (Asp-Glu-Ala-Asp) box polypeptide 39	NM_005804	10212	g5031658	5905.39	4824.71	-1.22	-1.16	-1.29	-1080.67	-5.78	0.004633	5905.39	5452.79	-1.08	-0.99	-1.19	-452.6	-1.487	0.193366	5678.74	5601.58	5974.86	6366.36	4917.12	4865.83	4617.6	4898.3	5248.61	4845.25	5788.61	5928.69
201585_s_at	SFPQ: splicing factor proline/glutamine-rich (polypyrimidine tract binding protein associated)	BG035151	6421	Hs.180610.0	6420	6077.14	-1.06	-1.03	-1.08	-342.86	-3.777	0.01231	6420	6221.05	-1.03	-0.97	-1.11	-198.96	-0.774	0.491878	6280.23	6490.51	6488.05	6421.23	5926	6019.5	6077.18	6285.9	6350.41	6880.54	5856.79	5796.46
201586_s_at	SFPQ: splicing factor proline/glutamine-rich (polypyrimidine tract binding protein associated)	NM_005066	6421	g4826997	8006.18	7430.08	-1.08	-1.03	-1.13	-576.1	-2.576	0.079087	8006.18	7944.63	-1.01	-0.92	-1.11	-61.55	-0.137	0.899951	8007.56	7942.88	7986.33	8087.95	7709.39	7778.7	6805.84	7426.39	8724.14	8720.89	7220.99	7112.52
201587_s_at	IRAK1: interleukin-1 receptor-associated kinase 1	NM_001569	3654	g4755143	4360.36	5478.32	1.26	1.08	1.45	1117.96	2.454	0.065006	4360.36	5201.95	1.19	1.03	1.37	841.59	1.993	0.107876	4119.55	3924.21	4733.77	4663.93	4720.42	4828.33	6076.68	6287.87	4545.82	4578.46	5734.49	5949.05
201588_at	TXNL1: thioredoxin-like 1	NM_004786	9352	g4759273	5201.39	4656.1	-1.12	-1.01	-1.24	-545.29	-1.881	0.144359	5201.39	4779.03	-1.09	-1.02	-1.16	-422.36	-2.234	0.086849	5189.83	5003.65	5376.82	5235.27	4191.2	4153.57	5121.12	5158.51	4761.58	5265.18	4620.18	4469.19
201589_at	SMC1A: structural maintenance of chromosomes 1A	D80000	8243	Hs.211602.0	3433.51	2683.92	-1.28	-1.22	-1.35	-749.6	-7.691	0.000552	3433.51	3116.68	-1.1	-1.01	-1.21	-316.84	-1.856	0.126759	3412.18	3540.81	3571.63	3209.44	2559.48	2685.97	2675.23	2814.98	2932.02	2810.53	3462.38	3261.78
201590_x_at	ANXA2: annexin A2	NM_004039	302	g4757755	2629.1	2478.95	-1.06	-0.99	-1.13	-150.15	-1.511	0.192919	2629.1	1868.36	-1.41	-1.29	-1.55	-760.74	-6.983	0.001397	2766.89	2629.21	2529.84	2590.47	2636.12	2617.24	2313.22	2349.23	1582.07	1943.31	1940.93	2007.15
201591_s_at	NISCH: nischarin	NM_007184	11188	g6005787	786.74	1024.03	1.3	1.13	1.47	237.29	2.974	0.052622	786.74	1003.22	1.28	1.2	1.36	216.48	5.988	0.002555	790.44	737.82	809.19	809.51	1120.35	1192.48	879.61	903.7	1065.24	918.07	993.67	1035.9
201592_at	EIF3H: eukaryotic translation initiation factor 3, subunit H	NM_003756	8667	g4503514	9019.37	8860.28	-1.02	-0.98	-1.06	-159.09	-0.787	0.471798	9019.37	9816.38	1.09	1.07	1.11	797.01	7.322	0.000563	9283.92	8926.4	8971.44	8895.72	8500.03	8607	9245.47	9088.62	9856.07	9973.91	9710.22	9725.32
201593_s_at	ZC3H15: zinc finger CCCH-type containing 15	AV716798	55854	Hs.6375.0	4875.47	4481.62	-1.09	-0.99	-1.2	-393.85	-1.472	0.225814	4875.47	4572.29	-1.07	-0.99	-1.15	-303.19	-1.474	0.218314	5076.91	4859.67	4750.9	4814.41	5070.73	4755.1	4001.41	4099.24	4058.05	4711.07	4976.27	4543.75
201594_s_at	PPP4R1: protein phosphatase 4, regulatory subunit 1	NM_005134	9989	g4826933	1487.35	1575.78	1.06	0.94	1.18	88.43	0.842	0.448991	1487.35	1508.07	1.01	0.85	1.18	20.72	0.139	0.896983	1413.81	1536.61	1564.31	1434.66	1686.51	1794.98	1387.78	1433.85	1226.9	1296.23	1714.94	1794.23
201595_s_at	ZC3H15: zinc finger CCCH-type containing 15	NM_018471	55854	g8923807	3857.93	3332.22	-1.16	-1.07	-1.26	-525.71	-3.179	0.043959	3857.93	3821.3	-1.01	-0.98	-1.04	-36.63	-0.616	0.561778	3945.07	3822.21	3883.95	3780.49	3641.98	3576.23	3012.14	3098.53	3925.2	3794.02	3861.6	3704.38
201597_at	COX7A2: cytochrome c oxidase subunit VIIa polypeptide 2 (liver)	NM_001865	1347	g4502988	9116.33	7710.44	-1.18	-0.94	-1.59	-1405.89	-1.163	0.327511	9116.33	9551.63	1.05	1.01	1.08	435.3	2.177	0.078825	9337.5	8956.76	8894.86	9276.2	5523.74	5752.87	10077.2	9487.91	9706.72	9234.64	9321.91	9943.25
201598_s_at	INPPL1: inositol polyphosphate phosphatase-like 1	NM_001567	3636	g4755141	291.4	488.97	1.68	1.51	1.86	197.57	6.798	0.003782	291.4	396.44	1.36	1.22	1.51	105.04	4.228	0.015328	291.14	276.35	283.36	314.75	481.1	563.95	429.32	481.5	348.18	365	442.42	430.18
201599_at	OAT: ornithine aminotransferase (gyrate atrophy)	NM_000274	4942	g4557808	1788.2	1322.17	-1.35	-1.16	-1.55	-466.03	-3.094	0.04502	1788.2	1974.33	1.1	0.97	1.28	186.13	1.265	0.291981	1529.9	1551.85	2104.66	1966.39	1260.76	1361.22	1255.38	1411.34	1930.47	1947.29	2021.38	1998.18
201600_at	PHB2: prohibitin 2	NM_007273	11331	g6005853	6234.41	5090.33	-1.22	-1.09	-1.39	-1144.08	-3.09	0.048051	6234.41	6187.76	-1.01	-0.98	-1.03	-46.65	-0.501	0.63601	6375.51	6348.96	6064.62	6148.56	4388.39	4541.75	5695.91	5735.25	6240.02	6064.51	6138.71	6307.81
201601_x_at	IFITM1: interferon induced transmembrane protein 1 (9-27)	NM_003641	8519	g4504580	1830.82	3042.22	1.66	1.49	1.86	1211.4	7.821	0.000266	1830.82	1630.38	-1.12	-0.95	-1.35	-200.43	-1.116	0.313118	1696.12	1666.97	1858.36	2101.81	3310.03	3159.83	2782.83	2916.18	1301.81	1461.86	1942.37	1815.49
201602_s_at	PPP1R12A: protein phosphatase 1, regulatory (inhibitor) subunit 12A	BE737620	4659	Hs.16533.0	543.05	664.29	1.22	1.12	1.34	121.25	3.573	0.015997	543.05	565.83	1.04	0.87	1.22	22.79	0.393	0.716481	557	491.52	573.35	550.32	640.83	593.83	717.32	705.19	441.43	518.47	696.94	606.49
201603_at	PPP1R12A: protein phosphatase 1, regulatory (inhibitor) subunit 12A	AI817061	4659	Hs.16533.0	1626.15	1776.68	1.09	0.98	1.22	150.53	1.329	0.233999	1626.15	1859.73	1.14	1.01	1.3	233.58	1.739	0.133674	1608.22	1440.55	1864.31	1591.5	1642.83	1663.93	1890.61	1909.35	1665.35	1729.39	2112.27	1931.9
201604_s_at	PPP1R12A: protein phosphatase 1, regulatory (inhibitor) subunit 12A	NM_002480	4659	g4505316	840.19	990.07	1.18	1.06	1.31	149.87	2.654	0.037972	840.19	910.26	1.08	0.91	1.27	70.06	0.774	0.47931	821.86	739.66	915.27	883.98	931.99	917.68	1095.03	1015.57	717.55	831.96	1057.4	1034.11
201605_x_at	CNN2: calponin 2	NM_004368	1265	g4758017	1531.32	1642.98	1.07	0.87	1.28	111.66	0.594	0.588806	1531.32	1453.29	-1.05	-0.98	-1.13	-78.02	-1.23	0.2697	1440.63	1573.03	1658.44	1453.18	1326.99	1333.89	1933.4	1977.64	1378.94	1554.23	1442.08	1437.94
201606_s_at	PWP1: PWP1 homolog (S. cerevisiae)	BE796924	11137	Hs.172589.0	3528.49	2708.79	-1.3	-1.16	-1.48	-819.7	-3.958	0.016768	3528.49	3222.99	-1.09	-1	-1.2	-305.51	-1.662	0.166989	3303.84	3534.03	3650.95	3625.15	2412.52	2347.54	3089.5	2985.59	2787.72	3146.21	3433.05	3524.96
201607_at	PWP1: PWP1 homolog (S. cerevisiae)	AI694451	11137	Hs.172589.0	723.69	532.82	-1.36	-1.18	-1.58	-190.87	-3.853	0.013232	723.69	784.54	1.08	1.02	1.15	60.85	2.24	0.083158	758.76	756.9	724.82	654.29	446.79	475.13	629.66	579.71	759.6	769.64	810.1	798.83
201608_s_at	PWP1: PWP1 homolog (S. cerevisiae)	NM_007062	11137	g5902033	2843.38	2136.75	-1.33	-1.18	-1.52	-706.63	-4.257	0.013739	2843.38	2646.22	-1.07	-0.99	-1.17	-197.16	-1.506	0.198306	2876.5	2704.38	2800.39	2992.24	1900.83	1840.47	2426.59	2379.11	2442.03	2449.33	2832.24	2861.28
201609_x_at	ICMT: isoprenylcysteine carboxyl methyltransferase	AL578502	23463	Hs.183212.0	1159.16	1207.4	1.04	0.88	1.21	48.24	0.417	0.696777	1159.16	1105.14	-1.05	-0.87	-1.3	-54.01	-0.404	0.707658	1223.25	1013.78	1200.42	1199.18	1079.57	997.99	1462.05	1289.97	845.83	952.4	1237.35	1385
201611_s_at	ICMT: isoprenylcysteine carboxyl methyltransferase	NM_012405	23463	g6912429	1308.62	1311.26	1	0.95	1.06	2.64	0.06	0.954846	1308.62	1365.57	1.04	0.97	1.12	56.95	0.962	0.394965	1262.21	1313.24	1355.16	1303.86	1401.17	1353.58	1254.83	1235.44	1488.43	1432.26	1260.72	1280.85
201612_at	ALDH9A1: aldehyde dehydrogenase 9 family, member A1	NM_000696	223	g4502046	3454.61	3793.32	1.1	0.99	1.23	338.71	1.442	0.203039	3454.61	2907.85	-1.19	-0.97	-1.5	-546.76	-1.398	0.225076	3892.88	3629.7	3223.87	3071.99	3543.32	3556.88	4075.43	3997.64	3428.32	3571.42	2322.05	2309.59
201613_s_at	AP1G2: adaptor-related protein complex 1, gamma 2 subunit	BC000519	8906	g12653494	288.79	334.52	1.16	0.8	1.53	45.73	0.717	0.522952	288.79	328.1	1.14	1	1.28	39.31	1.703	0.157918	303.38	274.8	268.15	308.83	212.08	240.05	452.33	433.63	339.55	268.08	341.25	363.52
201614_s_at	RUVBL1: RuvB-like 1 (E. coli)	NM_003707	8607	g4506752	974.12	768.06	-1.27	-1.2	-1.34	-206.06	-7.084	0.000512	974.12	812.43	-1.2	-1.11	-1.3	-161.69	-4.005	0.009008	943.05	1039.34	973.14	940.97	812.49	768.7	724.96	766.1	758.55	795.11	909.27	786.78
201618_x_at	GPAA1: glycosylphosphatidylinositol anchor attachment protein 1 homolog (yeast)	NM_003801	8733	g6031166	636.48	534.94	-1.19	-0.96	-1.54	-101.54	-1.333	0.261706	636.48	570.49	-1.12	-1.04	-1.19	-65.98	-2.562	0.051139	669.43	679.11	604.48	592.88	392.99	426.02	672.66	648.07	606.12	547.58	575.41	552.86
201619_at	PRDX3: peroxiredoxin 3	NM_006793	10935	g5802973	6495.85	6826.15	1.05	0.97	1.14	330.29	1.006	0.36553	6495.85	7602.88	1.17	1.09	1.26	1107.03	3.752	0.030804	6681.1	5626.9	6846.72	6828.68	6790.87	6429.7	6946.95	7137.07	7675.8	7645.8	7482.93	7606.98
201620_at	MBTPS1: membrane-bound transcription factor peptidase, site 1	NM_003791	8720	g4506774	1416.34	1107.61	-1.28	-1.13	-1.48	-308.73	-3.358	0.039086	1416.34	1214.58	-1.17	-1	-1.4	-201.76	-1.612	0.20169	1439.36	1445.34	1414.35	1366.31	943.77	1036.86	1363.14	1086.67	1001.95	1000.36	1397.1	1458.9
201622_at	SND1: staphylococcal nuclease and tudor domain containing 1	NM_014390	27044	g7657430	2444.42	2687.61	1.1	1.02	1.18	243.2	1.995	0.116042	2444.42	2302.77	-1.06	-1	-1.13	-141.65	-1.57	0.177162	2584.43	2376.66	2394.76	2421.81	2817.57	2924.12	2429.45	2579.31	2508.13	2323.14	2154.6	2225.22
201623_s_at	DARS: aspartyl-tRNA synthetase	BC000629	1615	g12653688	5894.52	5936.96	1.01	0.96	1.06	42.43	0.247	0.813441	5894.52	6925.53	1.17	1.12	1.24	1031.01	5.104	0.002421	5608.73	5767.7	6003.91	6197.76	5928.46	5729.57	6253.05	5836.75	7382.07	6706.6	6847.5	6765.96
201624_at	DARS: aspartyl-tRNA synthetase	NM_001349	1615	g4557512	2808.6	2511.25	-1.12	-0.99	-1.26	-297.36	-1.553	0.172373	2808.6	3138.17	1.12	1.01	1.24	329.57	1.793	0.12591	2575.5	2579.44	3175.1	2904.36	2254.87	2344.98	2663.52	2781.61	3351.36	3262.48	3106.21	2832.66
201625_s_at	INSIG1: insulin induced gene 1	BE300521	3638	Hs.56205.0	1846.22	814.25	-2.27	-1.97	-2.65	-1031.97	-10.92	3.5e-05	1846.22	1248.04	-1.48	-1.05	-2.48	-598.18	-1.913	0.143641	1907.96	1995.6	1790.9	1690.41	967.52	872.92	661.87	754.68	1830.99	1718.14	769.65	673.38
201626_at	INSIG1: insulin induced gene 1	BG292233	3638	Hs.56205.0	5735.22	2761.84	-2.08	-1.71	-2.62	-2973.37	-7.365	0.000626	5735.22	4397.72	-1.3	-0.9	-2.3	-1337.5	-1.137	0.333138	6133.12	6023.53	5626.22	5158	3137.95	3517.06	2102.11	2290.26	6638.19	6134.01	2616.28	2202.38
201627_s_at	INSIG1: insulin induced gene 1	NM_005542	3638	g5031800	3790.11	1677.38	-2.26	-1.89	-2.73	-2112.72	-7.663	0.000454	3790.11	2535.24	-1.49	-1.11	-2.21	-1254.87	-2.331	0.076465	4301.81	4040.93	3448.52	3369.16	1945.07	1951.4	1406.73	1406.33	3242.82	3492.81	1869	1536.33
201628_s_at	RRAGA: Ras-related GTP binding A	NM_006570	10670	g5729998	2121.5	2383.83	1.12	1.05	1.19	262.33	2.931	0.050697	2121.5	2720.2	1.28	1.26	1.31	598.7	21.286	7e-06	2127.1	2187.63	2074.47	2096.78	2187.65	2291.91	2543.29	2512.47	2708.62	2686.91	2739.79	2745.48
201629_s_at	ACP1: acid phosphatase 1, soluble	BE872974	52	Hs.75393.0	1667.82	1728.79	1.04	0.98	1.1	60.97	1.016	0.3502	1667.82	1375.37	-1.21	-0.89	-1.88	-292.44	-0.978	0.398323	1620.31	1780.11	1621.63	1649.21	1840.39	1768.42	1639.17	1667.17	582.38	2016.54	1502.44	1400.12
201630_s_at	ACP1: acid phosphatase 1, soluble	NM_004300	52	g4757713	7520.21	7644.58	1.02	0.97	1.06	124.37	0.617	0.559978	7520.21	8518.86	1.13	1.03	1.24	998.65	2.042	0.121046	7792.85	7613.59	7156.6	7517.82	7430.31	7441.05	7633.14	8073.81	9037.14	9579.11	7820.14	7639.06
201631_s_at	IER3: immediate early response 3	NM_003897	8870	g4503328	790.64	1095.93	1.39	0.6	2.2	305.29	0.801	0.480367	790.64	490.01	-1.61	-1.18	-2.51	-300.63	-2.65	0.057114	737.3	700.54	837.71	887.01	1749.29	1754.27	426.9	453.23	635.63	704.03	323.08	297.31
201632_at	EIF2B1: eukaryotic translation initiation factor 2B, subunit 1 alpha, 26kDa	NM_001414	1967	g4503502	3416.96	3512.66	1.03	0.97	1.09	95.7	0.756	0.492743	3416.96	2543.18	-1.34	-1.07	-1.79	-873.78	-2.19	0.101983	3185.4	3242.66	3615.48	3624.29	3552.06	3622.48	3464.07	3412.04	1774.29	2005.32	3268.46	3124.66
201633_s_at	CYB5B: cytochrome b5 type B (outer mitochondrial membrane)	AW235051	80777	Hs.79103.0	1532.65	1382.77	-1.11	-0.9	-1.45	-149.87	-0.752	0.503164	1532.65	1174.36	-1.31	-1.02	-1.81	-358.29	-1.782	0.166092	1419.05	1549.43	1569.47	1592.63	1044.81	1044.65	1690.72	1750.92	623.66	1177.76	1531.18	1364.83
201634_s_at	CYB5B: cytochrome b5 type B (outer mitochondrial membrane)	NM_030579	80777	g13385593	2027.48	1788.4	-1.13	-0.83	-1.61	-239.08	-0.653	0.5395	2027.48	1935.41	-1.05	-0.81	-1.37	-92.07	-0.293	0.779457	2256.27	1370.76	2325.46	2157.41	1257.62	1311.33	2268.34	2316.29	1409.86	1721.82	2331.5	2278.44
201635_s_at	FXR1: fragile X mental retardation, autosomal homolog 1	AI990766	8087	Hs.82712.0	3117.11	3972.5	1.27	1.18	1.38	855.39	4.849	0.004231	3117.11	3056.54	-1.02	-0.91	-1.15	-60.57	-0.289	0.785328	3203.17	3312.09	3095.24	2857.94	3966.33	3558.46	4164.72	4200.5	2553.31	3022.19	3411.93	3238.74
201636_at	FXR1: fragile X mental retardation, autosomal homolog 1	BG025078	8087	Hs.82712.0	974.31	1514.94	1.55	1.39	1.73	540.63	5.546	0.008848	974.31	1146.75	1.18	0.95	1.4	172.43	1.293	0.282252	1012.4	917.28	1003.34	964.24	1403.93	1306.09	1700.05	1649.69	834.51	1029.82	1408.27	1314.39
201637_s_at	FXR1: fragile X mental retardation, autosomal homolog 1	NM_005087	8087	g4826735	2943.78	3140.13	1.07	0.93	1.22	196.34	0.766	0.480045	2943.78	2685.63	-1.1	-1	-1.19	-258.16	-1.717	0.144434	3221.14	3091.15	2744.94	2717.91	2611.22	2928.5	3511.2	3509.58	2820.26	2834.98	2568.31	2518.95
201638_s_at	CPSF1: cleavage and polyadenylation specific factor 1, 160kDa	BE676642	29894	Hs.83727.0	76.36	75.39	-1.01	-0.86	-1.22	-0.96	-0.121	0.909465	76.36	67.5	-1.13	-0.97	-1.34	-8.86	-1.305	0.253522	83.74	78.52	74.54	68.62	90.43	78.8	76.87	55.47	68.77	83.61	55.8	61.8
201639_s_at	CPSF1: cleavage and polyadenylation specific factor 1, 160kDa	NM_013291	29894	g9558724	855.4	889.81	1.04	0.98	1.1	34.4	1.097	0.316095	855.4	918.29	1.07	0.98	1.17	62.89	1.344	0.246123	851.38	828.78	828.51	912.94	947.22	899.43	882.79	829.8	1038.61	848.15	872.28	914.13
201640_x_at	CLPTM1: cleft lip and palate associated transmembrane protein 1	NM_001294	1209	g4502896	216.29	213.09	-1.02	-0.9	-1.14	-3.2	-0.216	0.836537	216.29	273.05	1.26	0.96	1.59	56.76	1.406	0.241536	224.51	237.92	184.13	218.61	228.51	220.59	217.51	185.76	381.27	199.79	243.45	267.7
201641_at	BST2: bone marrow stromal cell antigen 2	NM_004335	684	g7262372	861.75	1132.32	1.31	1.23	1.4	270.57	7.272	0.000354	861.75	683.21	-1.26	-1.1	-1.48	-178.54	-2.817	0.046728	814.32	832.67	871.58	928.45	1056.43	1181.87	1131.15	1159.84	534.4	666.28	719.22	812.93
201642_at	IFNGR2: interferon gamma receptor 2 (interferon gamma transducer 1)	NM_005534	3460	g5031782	1222.07	1431.45	1.17	1.08	1.27	209.38	2.991	0.047007	1222.07	1152.24	-1.06	-0.89	-1.31	-69.83	-0.518	0.638597	1242.19	1246.97	1237.5	1161.62	1563.98	1514.07	1380.2	1267.56	870.85	979.11	1394.43	1364.59
201643_x_at	JMJD1B: jumonji domain containing 1B	NM_016604	51780	g7706598	1617.12	1986.67	1.23	1.14	1.32	369.55	4.491	0.005913	1617.12	1887.08	1.17	1.08	1.26	269.96	3.057	0.029002	1713.37	1666.92	1576.51	1511.7	2102.23	2094.52	1816.7	1933.23	1827.74	1725.34	2084.01	1911.24
201644_at	TSTA3: tissue specific transplantation antigen P35B	NM_003313	7264	g6598326	991.73	872.73	-1.14	-0.97	-1.36	-119	-1.313	0.254683	991.73	949.72	-1.04	-0.94	-1.16	-42.01	-0.667	0.530806	909.15	944.61	1034.23	1078.94	1017.14	1009.3	755.99	708.49	960.15	807.48	1007.61	1023.65
201646_at	SCARB2: scavenger receptor class B, member 2	AA885297	950	Hs.323567.0	63.67	105.32	1.65	1.48	1.85	41.66	7.718	0.000305	63.67	73.77	1.16	0.6	1.74	10.11	0.461	0.674663	72.5	61.83	64.19	56.15	116.22	97.54	107.46	100.07	33.13	41.42	121.73	98.82
201647_s_at	SCARB2: scavenger receptor class B, member 2	NM_005506	950	g5031630	23.27	46.06	1.98	1.61	2.45	22.78	5.07	0.004557	23.27	36.94	1.59	1.22	2.03	13.67	2.75	0.046572	29.69	19.71	21.87	21.83	50.87	53.4	44.07	35.89	32.68	27.65	48.31	39.12
201648_at	JAK1: Janus kinase 1 (a protein tyrosine kinase)	AL039831	3716	Hs.50651.0	1365.66	1249	-1.09	-0.93	-1.32	-116.66	-0.864	0.434583	1365.66	1819.45	1.33	1.24	1.44	453.79	6.635	0.000851	1501.06	1410.57	1292.88	1258.14	1427.81	1493.91	1030.86	1043.42	1862.14	1719.92	1900.67	1795.1
201649_at	UBE2L6: ubiquitin-conjugating enzyme E2L 6	NM_004223	9246	g4759281	1729.01	1568.03	-1.1	-0.78	-1.87	-160.98	-0.409	0.709498	1729.01	1771.15	1.02	0.93	1.12	42.13	0.435	0.682937	1831.49	1784.05	1662.06	1638.45	892.12	889.49	2219.22	2271.28	1942.39	1891.49	1629.69	1621.01
201651_s_at	PACSIN2: protein kinase C and casein kinase substrate in neurons 2	NM_007229	11252	g6005825	1321.44	1273.91	-1.04	-0.93	-1.17	-47.53	-0.53	0.624933	1321.44	1275.21	-1.04	-0.93	-1.16	-46.24	-0.555	0.60826	1273.31	1267.93	1402.25	1342.29	1403.71	1433.34	1137.23	1121.36	1096.3	1202.23	1369.63	1432.66
201652_at	COPS5: COP9 constitutive photomorphogenic homolog subunit 5 (Arabidopsis)	NM_006837	10987	g5803045	4842.07	4196.28	-1.15	-1.1	-1.21	-645.78	-5.092	0.012441	4842.07	4987.18	1.03	1.01	1.05	145.11	2.766	0.045935	4820.28	4896.78	4860.08	4791.14	4434.41	4334.59	3866.77	4149.37	4986.89	4984.81	5103.92	4873.12
201653_at	CNIH: cornichon homolog (Drosophila)	NM_005776	10175	g5031638	4588.07	5171.62	1.13	0.97	1.29	583.54	1.29	0.27509	4588.07	4728.23	1.03	0.92	1.14	140.16	0.459	0.668786	4888.19	4701.79	4459.92	4302.39	4394.27	4451.93	5998.23	5842.03	4172.69	5457.81	4817.73	4464.7
201656_at	ITGA6: integrin, alpha 6	NM_000210	3655	g4557674	1261.79	1564.39	1.24	0.46	2.05	302.6	0.499	0.650778	1261.79	1119.65	-1.13	-0.96	-1.33	-142.14	-1.208	0.272642	1464.56	1116.88	1310.94	1154.8	2680.53	2526.27	507.45	543.32	1358.03	1136.67	979.4	1004.51
201657_at	ARL1: ADP-ribosylation factor-like 1	BE890745	400	Hs.242894.0	442.04	403.54	-1.1	-0.97	-1.25	-38.49	-1.211	0.291287	442.04	380.99	-1.16	-0.84	-1.84	-61.04	-0.709	0.527694	411.18	448.5	471.84	436.62	448.57	457.43	340.09	368.09	190.05	286.3	545.21	502.42
201658_at	ARL1: ADP-ribosylation factor-like 1	AU151560	400	Hs.242894.0	1538.89	1292.3	-1.19	-1.05	-1.37	-246.59	-2.344	0.079099	1538.89	1552.21	1.01	0.52	1.51	13.32	0.029	0.978812	1462.93	1476.36	1613.97	1602.3	1435.94	1482.39	1103.41	1147.45	715.36	794.69	2309.33	2389.45
201659_s_at	ARL1: ADP-ribosylation factor-like 1	NM_001177	400	g4755126	989.11	885.42	-1.12	-0.94	-1.37	-103.69	-1.02	0.377137	989.11	846.55	-1.17	-0.96	-1.49	-142.55	-1.278	0.285171	928.19	1026.65	991.53	1010.07	1055.31	1058.26	690.82	737.29	568.1	780.12	1052.3	985.7
201660_at	ACSL3: Full-length cDNA clone CS0DF008YJ12 of Fetal brain of Homo sapiens (human) /// Acyl-CoA synthetase long-chain family member 3	AL525798	2181	Hs.268012.0	572.27	694.62	1.21	0.84	1.84	122.35	0.854	0.426144	572.27	884.86	1.55	1.13	2.28	312.59	2.378	0.059064	419.45	363.28	797.02	709.33	867.01	853.53	530.54	527.39	1078.46	938.23	770.67	752.06
201661_s_at	ACSL3: acyl-CoA synthetase long-chain family member 3	NM_004457	2181	g12669907	920.4	1165.87	1.27	0.92	1.8	245.47	1.215	0.270317	920.4	1360.38	1.48	1.14	2.04	439.98	2.541	0.052763	686.55	651.36	1247.26	1096.44	1330.69	1465.38	945.81	921.6	1536.74	1490.44	1209.22	1205.1
201662_s_at	ACSL3: acyl-CoA synthetase long-chain family member 3	D89053	2181	g4165017	1533.13	1464.13	-1.05	-0.98	-1.12	-69	-1.141	0.297649	1533.13	1541.6	1.01	0.93	1.08	8.46	0.119	0.908965	1483.72	1495.6	1665.71	1487.5	1549.62	1519.82	1390.37	1396.7	1395.04	1641.24	1610.69	1519.41
201663_s_at	SMC4: structural maintenance of chromosomes 4	NM_005496	10051	g4885112	1716.34	1956.61	1.14	1.06	1.23	240.27	2.78	0.043613	1716.34	1730.76	1.01	0.7	1.32	14.42	0.045	0.966807	1686.81	1696.64	1831.84	1650.08	1750.88	1928.44	2065.02	2082.12	1848.41	2582.84	1246.24	1245.57
201664_at	SMC4: structural maintenance of chromosomes 4	AL136877	10051	g6807670	4898.53	5798.51	1.18	1.12	1.25	899.97	5.073	0.002444	4898.53	6069.03	1.24	1.01	1.47	1170.5	1.722	0.176612	5202.12	4640.49	5046.34	4705.19	5630.94	5604.23	6098.54	5860.32	7129.85	7311.02	4855.16	4980.1
201665_x_at	RPS17: ribosomal protein S17	NM_001021	6218	g4506692	15315.3	15190.4	-1.01	-0.97	-1.05	-124.88	-0.373	0.723749	15315.3	15498.6	1.01	0.98	1.05	183.33	0.602	0.569981	15515.3	15753.9	14968.4	15023.5	14536.3	15529.4	15746.4	14949.5	15105	15242.4	16171.6	15475.4
201666_at	TIMP1: TIMP metallopeptidase inhibitor 1	NM_003254	7076	g4507508	61.75	396.32	6.42	5.25	7.91	334.56	10.569	0.001327	61.75	116.76	1.89	1.11	2.77	55	1.882	0.149189	75.61	46.88	62.44	62.08	479.14	409	344.65	352.48	57.84	77.48	166.06	165.64
201671_x_at	USP14: ubiquitin specific peptidase 14 (tRNA-guanine transglycosylase)	BC003556	9097	g13097695	2466.57	1272.29	-1.94	-1.52	-2.67	-1194.29	-5.538	0.009837	2466.57	2675.03	1.08	0.98	1.2	208.45	1.269	0.285688	2531.71	2391.17	2532.05	2411.36	1665.95	1608.07	967.19	847.94	2666.78	2232.59	2832.9	2967.83
201672_s_at	USP14: ubiquitin specific peptidase 14 (tRNA-guanine transglycosylase)	NM_005151	9097	g4827049	7487.46	5136.38	-1.46	-1.15	-1.97	-2351.08	-2.823	0.05594	7487.46	7458.54	-1	-0.95	-1.05	-28.92	-0.125	0.907953	7539.77	6842.54	7908.75	7658.77	6559.92	6484.84	3822.81	3677.94	7476.68	7354.36	7502.2	7500.9
201673_s_at	GYS1: glycogen synthase 1 (muscle)	NM_002103	2997	g4504232	449.62	430.7	-1.04	-0.82	-1.44	-18.92	-0.261	0.810562	449.62	410.53	-1.1	-0.97	-1.25	-39.1	-1.235	0.287526	436.38	429.14	478.3	454.68	315.05	299.5	573.48	534.79	441.18	321.76	433.68	445.49
201674_s_at	AKAP1: A kinase (PRKA) anchor protein 1	BC000729	8165	g12653874	1475.66	1321.64	-1.12	-1.08	-1.16	-154.02	-5.144	0.005318	1475.66	1635.84	1.11	0.95	1.27	160.18	1.094	0.352576	1485.8	1460.13	1507.79	1448.91	1348.78	1380.68	1297.63	1259.47	1888.01	1879.7	1321.32	1454.32
201675_at	AKAP1: A kinase (PRKA) anchor protein 1	NM_003488	8165	g4502014	1445.12	1163.04	-1.24	-1.21	-1.28	-282.08	-11.652	0.00011	1445.12	1584.72	1.1	0.84	1.36	139.6	0.616	0.580941	1430.57	1484.92	1472.43	1392.56	1159.64	1197.96	1146.97	1147.59	1958.22	1990.93	1155.89	1233.85
201676_x_at	PSMA1: proteasome (prosome, macropain) subunit, alpha type, 1	NM_002786	5682	g4506178	8900.65	8991.61	1.01	0.98	1.04	90.95	0.608	0.565608	8900.65	7876.37	-1.13	-1.05	-1.22	-1024.29	-2.958	0.048156	8883.37	9146.13	8649.53	8923.58	9006.77	8681.4	9092.13	9186.14	6924.6	8460.82	8049.41	8070.64
201677_at	C3orf37: Chromosome 3 open reading frame 37	AI937543	56941	Hs.110480.0	464.52	377.6	-1.23	-1.08	-1.42	-86.92	-2.597	0.04927	464.52	649.14	1.4	1.29	1.52	184.62	6.474	0.000853	496.64	476	415.84	469.58	326.5	355.04	369.41	459.44	616.14	604.05	692.02	684.34
201678_s_at	C3orf37: chromosome 3 open reading frame 37	NM_020187	56941	g9910181	794.35	654.26	-1.21	-0.95	-1.67	-140.08	-1.287	0.284887	794.35	789.67	-1.01	-0.89	-1.15	-4.68	-0.076	0.943997	833.35	782.38	758.02	803.64	463.9	472.96	860.96	819.24	660.46	716.19	877.25	904.77
201679_at	ARS2: arsenate resistance protein 2	BE646076	51593	Hs.111801.0	151.83	160.27	1.06	0.91	1.22	8.44	0.597	0.574306	151.83	139.39	-1.09	-0.97	-1.22	-12.45	-1.201	0.277853	169.64	132.55	160.33	144.82	166.06	133.47	188.27	153.28	128.03	155.18	143.88	130.47
201680_x_at	ARS2: arsenate resistance protein 2	NM_015908	51593	g7706237	4591.56	4665.1	1.02	0.97	1.06	73.54	0.56	0.600551	4591.56	4685.39	1.02	0.99	1.05	93.83	1.227	0.27652	4725.6	4611.69	4408.77	4620.19	4383.77	4593.29	4779.26	4904.07	4780.84	4694.55	4595.15	4671.02
201681_s_at	DLG5: discs, large homolog 5 (Drosophila)	AB011155	9231	Hs.170290.0	441.91	674.78	1.53	1.01	2.09	232.87	1.68	0.182579	441.91	487.21	1.1	0.85	1.39	45.29	0.645	0.551065	516.78	471.58	390.84	388.46	893.08	923.64	440.68	441.74	379.18	378.26	585.52	605.88
201682_at	PMPCB: peptidase (mitochondrial processing) beta	NM_004279	9512	g4758733	3624.12	3452.74	-1.05	-1.01	-1.09	-171.38	-2.05	0.107761	3624.12	2404.68	-1.51	-1.1	-2.37	-1219.43	-2.283	0.105928	3650.3	3668.09	3653.94	3524.14	3387.62	3308.94	3448.59	3665.81	3207.68	3440.78	1492.49	1477.79
201683_x_at	TOX4: TOX high mobility group box family member 4	BE783632	9878	Hs.194035.0	480.87	589.01	1.22	1.13	1.32	108.14	3.766	0.030134	480.87	479.34	-1	-0.94	-1.08	-1.53	-0.075	0.944639	485.69	482.51	467.89	487.39	591.28	508.43	634.91	621.42	516.13	506.2	466.25	428.77
201684_s_at	TOX4: TOX high mobility group box family member 4	BF001668	9878	Hs.194035.0	651.94	704.97	1.08	0.98	1.18	53.02	1.349	0.252124	651.94	623.13	-1.05	-0.99	-1.11	-28.82	-1.235	0.267741	686.18	643.75	621.34	656.51	657.9	626.25	769.93	765.79	637.73	670.15	595.18	589.45
201685_s_at	TOX4: TOX high mobility group box family member 4	NM_014828	9878	g7662273	515.04	549.27	1.07	1	1.14	34.22	1.697	0.167156	515.04	547.13	1.06	0.92	1.22	32.09	0.691	0.526346	565.66	501.24	516.81	476.46	529.79	546.59	558.42	562.27	544.5	667.95	483.36	492.73
201686_x_at	API5: apoptosis inhibitor 5	AF229254	8539	g12656084	126.82	137.2	1.08	1.01	1.16	10.38	1.78	0.127837	126.82	135.52	1.07	0.89	1.25	8.71	0.644	0.559949	135.18	123.71	129.93	118.44	127.47	149.08	138.48	133.77	159.16	153.98	125.7	103.25
201687_s_at	API5: apoptosis inhibitor 5	NM_006595	8539	g5729729	2489.25	2042.91	-1.22	-1.14	-1.3	-446.33	-5.113	0.002729	2489.25	3022.11	1.21	1.11	1.33	532.87	3.376	0.024286	2516.67	2596.17	2558.46	2285.68	2123.04	2071.63	2088.11	1888.87	3264.52	3269.94	2766.2	2787.79
201688_s_at	TPD52: tumor protein D52	BG389015	7163	Hs.2384.0	1648.43	1425.18	-1.16	-0.93	-1.51	-223.25	-1.074	0.353157	1648.43	1434.38	-1.15	-0.85	-1.74	-214.05	-0.716	0.522671	1530.65	1647.79	1783.69	1631.6	1099.69	1055.06	1746.73	1799.24	668.86	1275.89	1915.86	1876.92
201689_s_at	TPD52: tumor protein D52	BE974098	7163	Hs.2384.0	2502.84	2022.1	-1.24	-1.04	-1.53	-480.75	-1.99	0.120026	2502.84	2251.87	-1.11	-0.83	-1.67	-250.97	-0.54	0.624123	2343.89	2405.23	2735.27	2526.99	1589.78	1676.82	2446.67	2375.11	1252.79	1702.96	3002.76	3048.96
201690_s_at	TPD52: tumor protein D52	AA524023	7163	Hs.2384.0	4953.92	4188.78	-1.18	-0.98	-1.48	-765.15	-1.491	0.227334	4953.92	4343.53	-1.14	-0.84	-1.78	-610.4	-0.638	0.56787	4711.14	4993.12	5149.16	4962.28	3307.86	3321.2	5024.38	5101.67	2514.11	2902.84	6205.44	5751.71
201691_s_at	TPD52: tumor protein D52	NM_005079	7163	g4827037	289.34	160.34	-1.8	-1.64	-1.98	-129	-9.053	0.000817	289.34	216.47	-1.34	-0.93	-2.32	-72.87	-1.277	0.283387	254.8	306.17	313.09	283.29	146.5	165.26	172.02	157.59	98.31	147.14	328.63	291.8
201692_at	OPRS1: opioid receptor, sigma 1	NM_005866	10280	g5032116	1630.1	1120.55	-1.45	-1.1	-2.12	-509.54	-2.324	0.090792	1630.1	1371	-1.19	-1.05	-1.36	-259.1	-2.295	0.070127	1768.93	1679.27	1497.04	1575.15	745.77	766.84	1527.7	1441.9	1219.98	1190.25	1539.45	1534.31
201693_s_at	EGR1: early growth response 1	AV733950	1958	Hs.326035.0	66.03	79.83	1.21	0.8	1.66	13.79	0.83	0.457037	66.03	50.45	-1.31	-1.12	-1.51	-15.59	-2.736	0.05623	74.64	64.28	73.69	51.52	108.05	105.04	60.58	45.64	50.69	48.88	46.66	55.56
201694_s_at	EGR1: early growth response 1	NM_001964	1958	g4503492	33.75	286.09	8.48	1.77	15.42	252.34	1.833	0.164065	33.75	48.68	1.44	0.92	2.01	14.93	1.384	0.252359	35.03	28.46	39.74	31.79	520.67	528.11	54.44	41.15	69.31	64.32	31.15	29.95
201695_s_at	NP: nucleoside phosphorylase	NM_000270	4860	g4557800	2153.38	1951.99	-1.1	-0.71	-1.54	-201.38	-0.419	0.698332	2153.38	2314.97	1.08	0.79	1.66	161.59	0.346	0.749999	1407.57	1325.74	2902.99	2977.22	2157.7	2275.3	1705.95	1669.03	2422.35	2557.59	2115.21	2164.74
201696_at	SFRS4: splicing factor, arginine/serine-rich 4	NM_005626	6429	g5032088	3090.09	3032.55	-1.02	-0.88	-1.2	-57.54	-0.206	0.848734	3090.09	3060.53	-1.01	-0.97	-1.05	-29.56	-0.373	0.723172	2942.59	3122.23	3045.55	3249.98	3537.99	3448.25	2442.65	2701.3	2980.22	3006.41	3070.83	3184.65
201697_s_at	DNMT1: DNA (cytosine-5-)-methyltransferase 1	NM_001379	1786	g4503350	6077.28	5921.47	-1.03	-0.97	-1.08	-155.81	-0.81	0.450205	6077.28	6029.91	-1.01	-0.92	-1.11	-47.37	-0.143	0.892678	6263.01	6390.81	5899.05	5756.25	5573.31	5938.46	6076.43	6097.71	5152.59	6225.4	6293.63	6448.01
201698_s_at	SFRS9: splicing factor, arginine/serine-rich 9	NM_003769	8683	g4506902	7468.25	8267.65	1.11	1.02	1.2	799.4	2.04	0.114964	7468.25	7035.86	-1.06	-0.97	-1.17	-432.39	-1.079	0.345021	7260.84	7532.25	7257.7	7822.21	8901.99	8908	7661.07	7599.54	5992.75	6983.82	7485	7681.88
201699_at	PSMC6: proteasome (prosome, macropain) 26S subunit, ATPase, 6	NM_002806	5706	g4506214	4608.93	4394.61	-1.05	-0.98	-1.13	-214.32	-1.074	0.334729	4608.93	4367.72	-1.06	-0.94	-1.2	-241.21	-0.756	0.495879	4656.22	4324.76	4692.67	4762.07	4039.12	4151.87	4695.45	4692	3474.53	4510.63	4805.49	4680.22
201700_at	CCND3: cyclin D3	NM_001760	896	g4502618	4949.04	4030.09	-1.23	-1.08	-1.41	-918.95	-2.61	0.04092	4949.04	4308.61	-1.15	-0.92	-1.51	-640.43	-0.98	0.38485	5515.28	5130.21	4569.74	4580.92	3468.46	3686.15	4555.44	4410.3	5769.77	4868.45	3316.68	3279.55
201701_s_at	PGRMC2: progesterone receptor membrane component 2	NM_006320	10424	g5453915	740.44	620.57	-1.19	-1.03	-1.42	-119.87	-1.987	0.135222	740.44	707.76	-1.05	-0.95	-1.17	-32.68	-0.719	0.519035	719.29	770.81	739.23	732.43	549.4	543.35	594.27	795.25	698.16	744.59	797.98	590.3
201702_s_at	PPP1R10: protein phosphatase 1, regulatory (inhibitor) subunit 10	AI492873	5514	Hs.106019.0	379.25	350.26	-1.08	-0.98	-1.2	-28.99	-1.324	0.235272	379.25	262.87	-1.44	-1.17	-1.86	-116.38	-3.104	0.036692	381.86	404.93	390.53	339.68	361.54	303.33	382.8	353.34	250.54	174.03	339.4	287.51
201703_s_at	PPP1R10: protein phosphatase 1, regulatory (inhibitor) subunit 10	NM_002714	5514	g4506008	554.62	554.81	1	0.93	1.07	0.19	0.008	0.993805	554.62	459.08	-1.21	-1.05	-1.41	-95.54	-2.309	0.077587	605.47	526.57	534.03	552.42	564.71	561.68	580.58	512.28	469.54	350.41	508.31	508.07
201704_at	ENTPD6: ectonucleoside triphosphate diphosphohydrolase 6 (putative function)	NM_001247	955	g4557422	387.41	631.33	1.63	1.46	1.84	243.93	8.621	0.001181	387.41	622	1.61	1.43	1.83	234.6	7.192	0.000556	452.22	391.89	382.52	322.98	640.87	655.11	614.23	615.11	652.21	569.08	619.24	647.49
201705_at	PSMD7: proteasome (prosome, macropain) 26S subunit, non-ATPase, 7	NM_002811	5713	g4506230	2855.62	2671.33	-1.07	-0.98	-1.17	-184.29	-1.265	0.283686	2855.62	2858.1	1	0.9	1.1	2.48	0.014	0.989539	2792.91	2963.84	2869.17	2796.57	2380	2483.31	2901.94	2920.08	3025.01	3252.91	2645	2509.48
201706_s_at	PEX19: peroxisomal biogenesis factor 19	BC000496	5824	g12653448	433.94	402.15	-1.08	-0.86	-1.43	-31.79	-0.517	0.635628	433.94	438.67	1.01	0.83	1.2	4.74	0.096	0.928587	456.13	473.55	403.74	402.34	292.21	308.89	504.45	503.05	574.91	414.16	375.3	390.33
201707_at	PEX19: peroxisomal biogenesis factor 19	NM_002857	5824	g4506338	1223.41	868.12	-1.41	-1.21	-1.69	-355.29	-3.879	0.017597	1223.41	1220.09	-1	-0.94	-1.07	-3.32	-0.069	0.94717	1313.64	1245.06	1155.3	1179.65	974.54	1044.93	764.1	688.93	1312.65	1168.47	1184.04	1215.2
201708_s_at	NIPSNAP1: nipsnap homolog 1 (C. elegans)	AW083371	8508	Hs.173878.0	960.77	848.14	-1.13	-0.99	-1.31	-112.63	-1.547	0.194143	960.77	864.15	-1.11	-0.91	-1.42	-96.61	-0.832	0.459572	1035.81	981.22	917.63	908.42	979.66	929.77	797.68	685.45	674.28	666.06	1040.18	1076.1
201709_s_at	NIPSNAP1: nipsnap homolog 1 (C. elegans)	NM_003634	8508	g4505398	2065.09	1919.62	-1.08	-0.95	-1.22	-145.47	-0.993	0.359101	2065.09	1900.05	-1.09	-0.85	-1.48	-165.04	-0.521	0.632239	2269.05	2200.04	1949.06	1842.21	2047.09	2151.04	1753.26	1727.09	1436.16	1327.03	2402.59	2434.42
201710_at	MYBL2: v-myb myeloblastosis viral oncogene homolog (avian)-like 2	NM_002466	4605	g4505292	1323.9	1198.76	-1.1	-1.01	-1.21	-125.13	-1.909	0.12622	1323.9	1194.81	-1.11	-0.98	-1.26	-129.09	-1.418	0.237305	1374.64	1365.68	1276.12	1279.14	1134.71	1064.75	1272.54	1323.06	1085.63	1009.01	1321.68	1362.91
201711_x_at	RANBP2: RAN binding protein 2	AI681120	5903	Hs.199179.0	1346.02	1459.48	1.08	0.72	1.46	113.46	0.373	0.732673	1346.02	1013.84	-1.33	-1.21	-1.46	-332.17	-4.765	0.004061	1446.74	1187.93	1405.04	1344.36	2029.48	1922.8	961.53	924.1	923.27	1111.04	978.79	1042.27
201712_s_at	RANBP2: RAN binding protein 2	NM_006267	5903	g6382078	823.54	780.43	-1.06	-0.93	-1.22	-43.11	-0.667	0.548406	823.54	985.78	1.2	1.11	1.29	162.24	3.577	0.026903	855.14	830.14	823.39	785.49	860.6	915.05	678.21	667.85	880.65	950.41	1052.26	1059.8
201713_s_at	RANBP2: RAN binding protein 2	D42063	5903	g924266	2243.9	2684.53	1.2	1.08	1.31	440.63	2.903	0.040367	2243.9	2091.06	-1.07	-0.97	-1.19	-152.84	-1.172	0.295951	2341.01	2319.92	2259.56	2055.12	2770.57	3034.01	2445.23	2488.31	1765	2252.87	2232.03	2114.36
201714_at	TUBG1: tubulin, gamma 1	NM_001070	7283	g4507730	2180.5	2187.52	1	0.88	1.13	7.02	0.044	0.967609	2180.5	1956.7	-1.11	-1.02	-1.23	-223.8	-1.93	0.12402	2098.13	2112.09	2294.74	2217.04	1920.04	1925.64	2507.21	2397.2	2127.5	2149.75	1812.72	1736.82
201715_s_at	ACIN1: apoptotic chromatin condensation inducer 1	NM_014977	22985	g7662237	1177.53	1173.19	-1	-0.83	-1.24	-4.34	-0.031	0.976786	1177.53	1138.36	-1.03	-0.92	-1.17	-39.17	-0.454	0.666147	1088.92	1070.98	1290.73	1259.5	1459.28	1318.84	927.62	987.03	1325.9	1035.03	1121.18	1071.34
201716_at	SNX1: sorting nexin 1	NM_003099	6642	g4507138	725.13	424.25	-1.71	-1.21	-2.91	-300.88	-2.814	0.065531	725.13	859.3	1.19	1.06	1.31	134.17	2.406	0.089347	718.53	738.52	698.17	745.31	246.51	233.79	616.86	599.83	1005.7	867.6	817.3	746.6
201717_at	MRPL49: mitochondrial ribosomal protein L49	NM_004927	740	g4826648	1813.4	1724.53	-1.05	-0.86	-1.35	-88.87	-0.38	0.729122	1813.4	1989.38	1.1	0.99	1.21	175.98	1.48	0.230736	1824.08	1760.88	1856.1	1812.52	2149.63	2105.97	1345.64	1296.88	2333.89	1896.24	1808.69	1918.7
201718_s_at	EPB41L2: erythrocyte membrane protein band 4.1-like 2	BF511685	2037	Hs.7857.0	272	256.08	-1.06	-0.92	-1.25	-15.92	-0.675	0.539732	272	162.85	-1.67	-1.24	-2.55	-109.15	-3.134	0.045593	261.22	257.91	290.4	278.47	298.22	291.1	216.27	218.74	68.64	229.32	186.24	167.2
201719_s_at	EPB41L2: erythrocyte membrane protein band 4.1-like 2	NM_001431	2037	g4503578	1347.89	1071.92	-1.26	-1.14	-1.4	-275.96	-3.854	0.016207	1347.89	1024.01	-1.32	-1.07	-1.71	-323.88	-2.221	0.105538	1386.01	1346.47	1396.53	1262.55	1173.57	1186.06	920.51	1007.56	1304.42	1235.29	780.53	775.78
201720_s_at	LAPTM5: lysosomal associated multispanning membrane protein 5	AI589086	7805	Hs.79356.0	1352.35	767.65	-1.76	-1.33	-2.58	-584.7	-3.863	0.025765	1352.35	852.93	-1.59	-1.42	-1.78	-499.42	-7.788	0.000584	1292.5	1297.64	1419.04	1400.22	512.3	512.03	1007.75	1038.54	692.14	874.42	924.91	920.23
201721_s_at	LAPTM5: lysosomal associated multispanning membrane protein 5	NM_006762	7805	g5803055	5211.62	2047.07	-2.55	-2.07	-3.3	-3164.55	-10.44	0.000549	5211.62	4215.62	-1.24	-1.14	-1.35	-996	-4.397	0.008162	5186.67	4932.11	5263.71	5463.98	1608.77	1509.46	2543.45	2526.58	4736.85	3773.31	4173.43	4178.89
201722_s_at	GALNT1: UDP-N-acetyl-alpha-D-galactosamine:polypeptide N-acetylgalactosaminyltransferase 1 (GalNAc-T1)	AV692127	2589	Hs.80120.0	1722.42	1637.64	-1.05	-0.88	-1.31	-84.78	-0.427	0.696969	1722.42	1650.81	-1.04	-0.89	-1.26	-71.61	-0.418	0.702893	1722.09	1685.96	1805.32	1676.29	1283.44	1313.54	2008	1945.57	1306.54	1425.02	2008.74	1862.94
201723_s_at	GALNT1: UDP-N-acetyl-alpha-D-galactosamine:polypeptide N-acetylgalactosaminyltransferase 1 (GalNAc-T1)	U41514	2589	g1136284	2057.56	2030.15	-1.01	-0.91	-1.15	-27.41	-0.188	0.860293	2057.56	2076.44	1.01	0.8	1.22	18.88	0.072	0.946655	2038.59	1936.11	2167.83	2087.71	1841.68	1751.57	2305.47	2221.87	1596.64	1668.38	2521.1	2519.64
201724_s_at	GALNT1: UDP-N-acetyl-alpha-D-galactosamine:polypeptide N-acetylgalactosaminyltransferase 1 (GalNAc-T1)	NM_020474	2589	g13124890	1275.21	1112.32	-1.15	-0.91	-1.47	-162.89	-0.97	0.371236	1275.21	1555.82	1.22	0.95	1.54	280.61	1.302	0.253304	1064.85	1131.86	1493.24	1410.9	859.15	912.03	1353.94	1324.18	1260.94	1200.33	1911.37	1850.65
201725_at	CDC123: cell division cycle 123 homolog (S. cerevisiae)	NM_006023	8872	g5174422	6196.37	5829.93	-1.06	-1	-1.13	-366.43	-1.681	0.143682	6196.37	4835.44	-1.28	-1.21	-1.35	-1360.93	-7.197	0.000541	6238.3	6473.76	5762.5	6310.9	6076.7	6120.31	5548.21	5574.5	4606.96	5140.15	4820.42	4774.23
201726_at	ELAVL1: ELAV (embryonic lethal, abnormal vision, Drosophila)-like 1 (Hu antigen R)	BC003376	1994	g13097227	4195.61	3770.98	-1.11	-1.06	-1.17	-424.64	-3.96	0.010819	4195.61	4123.79	-1.02	-0.96	-1.08	-71.83	-0.456	0.6729	4311.91	4042.53	4222.55	4205.47	3949.74	3902.89	3651.4	3579.88	3969.87	3794.37	4291.42	4439.48
201727_s_at	ELAVL1: ELAV (embryonic lethal, abnormal vision, Drosophila)-like 1 (Hu antigen R)	NM_001419	1994	g4503550	2416.42	2380.68	-1.02	-0.87	-1.21	-35.74	-0.151	0.888775	2416.42	1864.92	-1.3	-1.21	-1.39	-551.5	-6.444	0.00098	2337.93	2325.79	2478.6	2523.35	1969.64	1994.48	2723.18	2835.42	1782.14	2072.85	1814.49	1790.18
201728_s_at	KIAA0100: KIAA0100	AA904674	9703	Hs.151761.0	187.95	142.91	-1.32	-1.2	-1.45	-45.04	-5.151	0.005594	187.95	148.96	-1.26	-1.17	-1.37	-38.99	-5.231	0.00377	184.1	189.57	197.68	180.47	130.48	129.13	150.48	161.56	154.1	164.24	134.85	142.65
201729_s_at	KIAA0100: KIAA0100	NM_014680	9703	g7661903	672.2	505.62	-1.33	-1.27	-1.4	-166.58	-9.386	0.000102	672.2	562.98	-1.19	-1.12	-1.27	-109.22	-4.786	0.003729	704.03	682.15	662.78	639.83	514.82	525.48	508.84	473.35	566.06	611.26	524.25	550.35
201730_s_at	TPR: translocated promoter region (to activated MET oncogene)	BF110993	7175	Hs.169750.0	1783.92	2074.63	1.16	1.02	1.33	290.71	1.846	0.115108	1783.92	1982.5	1.11	0.95	1.29	198.58	1.13	0.305242	2026.45	1737.39	1845.15	1526.7	2403.34	2087.29	1894.4	1913.49	1681.31	1848.48	2335.14	2065.08
201731_s_at	TPR: translocated promoter region (to activated MET oncogene)	NM_003292	7175	g4507658	1596.37	1601.67	1	0.91	1.1	5.3	0.058	0.956404	1596.37	1729.17	1.08	0.98	1.19	132.8	1.299	0.265112	1692.12	1615.45	1558.74	1519.17	1702.03	1773.03	1523.96	1407.65	1509.65	1633.24	1912.5	1861.29
201732_s_at	CLCN3: chloride channel 3	AF029346	1182	Hs.174139.0	476.65	513.5	1.08	0.97	1.19	36.85	1.172	0.294384	476.65	409.2	-1.16	-0.94	-1.51	-67.45	-1.149	0.322856	520.28	460.74	481.6	443.99	513.55	439.14	563.57	537.72	277.61	368.52	541.75	448.91
201733_at	CLCN3: chloride channel 3	AA902971	1182	Hs.174139.0	539.34	488.89	-1.1	-0.96	-1.29	-50.45	-1.147	0.309505	539.34	424.67	-1.27	-1.06	-1.57	-114.67	-2.246	0.087711	547.28	558.44	569.8	481.83	439.03	406.91	572.73	536.88	315.53	383.95	529.78	469.41
201734_at	CLCN3: Chloride channel 3	AI760629	1182	Hs.174139.0	1850.27	1623.18	-1.14	-1.1	-1.18	-227.1	-6.447	0.003802	1850.27	1274.25	-1.45	-1.08	-2.22	-576.02	-2.135	0.119771	1836.16	1851.56	1937.26	1776.12	1648.73	1632.56	1617.3	1594.11	783.94	851.97	1843.28	1617.81
201735_s_at	CLCN3: chloride channel 3	NM_001829	1182	g4502868	1322.62	1381.13	1.04	0.94	1.15	58.51	0.706	0.507107	1322.62	1261.38	-1.05	-0.91	-1.23	-61.24	-0.53	0.620133	1448.15	1375.03	1275.69	1191.6	1280.46	1271.87	1502.7	1469.47	998.54	1211.42	1447.6	1387.95
201736_s_at	MARCH6: membrane-associated ring finger (C3HC4) 6	BF000409	10299	Hs.20141.0	1471.72	2006.07	1.36	1.2	1.53	534.35	3.777	0.028155	1471.72	1149.05	-1.28	-1.2	-1.37	-322.67	-6.244	0.001312	1525.74	1391.4	1493.62	1476.12	2244.74	2247.08	1757.16	1775.3	1025.79	1224.61	1164.49	1181.3
201737_s_at	MARCH6: membrane-associated ring finger (C3HC4) 6	NM_005885	10299	g5032166	739.83	741.55	1	0.84	1.18	1.72	0.022	0.982928	739.83	974.41	1.32	1.19	1.47	234.58	4.567	0.004773	753.54	618.73	789.74	797.31	829.27	870.62	604.69	661.6	1049.64	991.04	949.11	907.83
201738_at	EIF1B: eukaryotic translation initiation factor 1B	NM_005875	10289	g5031710	4823.29	5168.95	1.07	0.98	1.16	345.66	1.353	0.243645	4823.29	5262.01	1.09	1.02	1.16	438.72	2.213	0.076494	4997.4	5021.13	4637.05	4637.56	4747.2	4845.14	5337.56	5745.9	5328.88	5626.67	5272.71	4819.78
201739_at	SGK1: serum/glucocorticoid regulated kinase 1	NM_005627	6446	g5032090	115.55	201.76	1.75	1.41	2.19	86.21	4.245	0.006373	115.55	92.67	-1.25	-0.83	-2.19	-22.88	-0.86	0.433366	88.41	101.35	137.42	135.01	169.06	196.79	246.59	194.59	108.39	152.4	50.38	59.52
201740_at	NDUFS3: NADH dehydrogenase (ubiquinone) Fe-S protein 3, 30kDa (NADH-coenzyme Q reductase)	NM_004551	4722	g4758787	4264.51	4399.59	1.03	0.92	1.14	135.08	0.483	0.660643	4264.51	4409.39	1.03	0.91	1.16	144.88	0.444	0.686293	4334.04	4174.17	4206.8	4343.02	4922.92	4830.01	3893.75	3951.67	3705.97	4017.82	4890.29	5023.46
201741_x_at	SFRS1: splicing factor, arginine/serine-rich 1 (splicing factor 2, alternate splicing factor)	M69040	6426	Hs.73737.0	87.06	76.11	-1.14	-0.9	-1.55	-10.95	-0.896	0.433961	87.06	74.54	-1.17	-0.89	-1.7	-12.52	-0.878	0.442916	84.3	91.8	85.75	86.38	100.94	92.65	52.97	57.89	36.86	77.12	78.63	105.56
201742_x_at	SFRS1: splicing factor, arginine/serine-rich 1 (splicing factor 2, alternate splicing factor)	NM_006924	6426	g5902075	1215.2	1101.77	-1.1	-1.01	-1.21	-113.43	-1.787	0.124269	1215.2	862.49	-1.41	-1.06	-2.06	-352.71	-2.065	0.118406	1162.64	1111.79	1289.78	1296.59	1182.97	1132.47	1112.46	979.17	370.01	1044.45	1034.32	1001.16
201745_at	TWF1: twinfilin, actin-binding protein, homolog 1 (Drosophila)	NM_002822	5756	g4506274	1570.86	2293.8	1.46	1.07	1.94	722.94	1.979	0.111175	1570.86	1815.7	1.16	0.83	1.56	244.84	0.749	0.487999	1962.61	1735.18	1320.35	1265.28	1808.14	1661.21	2811.29	2894.56	1168.85	1532.19	2360.24	2201.51
201746_at	TP53: tumor protein p53 (Li-Fraumeni syndrome)	NM_000546	7157	g8400737	104.3	121.22	1.16	1.02	1.32	16.91	1.82	0.131668	104.3	148.15	1.42	1.06	1.8	43.85	1.901	0.14648	117.43	101.69	96.19	101.91	132.44	136.22	114.86	101.35	209.36	102.83	130.05	150.38
201747_s_at	SAFB: scaffold attachment factor B	AI769566	6294	Hs.23978.0	245.06	288.26	1.18	1.04	1.32	43.2	2.225	0.073831	245.06	233.79	-1.05	-0.89	-1.26	-11.26	-0.456	0.670345	274.39	226.12	231.13	248.59	313.42	314.15	247.04	278.41	173.73	280.75	242.41	238.27
201748_s_at	SAFB: scaffold attachment factor B	NM_002967	6294	g4506778	2753.26	3004.19	1.09	0.92	1.28	250.93	0.882	0.417709	2753.26	3129.16	1.14	1	1.29	375.9	1.709	0.138541	3087.83	2930.36	2505.56	2489.28	3598.06	3193.17	2642.2	2583.34	3516.06	3262.97	2828.08	2909.52
201749_at	ECE1: endothelin converting enzyme 1	BF969352	1889	Hs.288203.0	122.46	145.3	1.19	1.04	1.37	22.84	2.091	0.088641	122.46	140.78	1.15	0.97	1.37	18.32	1.334	0.231261	138.79	98.2	133.84	119.01	163.24	137.76	140.83	139.35	168.78	119.28	137.45	137.63
201751_at	JOSD1: Josephin domain containing 1	NM_014876	9929	g7661887	1053.43	697.72	-1.51	-1.28	-1.82	-355.71	-4.353	0.006426	1053.43	1373.73	1.3	1.2	1.42	320.3	5.322	0.001961	992.5	969.17	1171.34	1080.7	585.98	575.9	808.58	820.39	1270.1	1359.55	1424.83	1440.42
201752_s_at	ADD3: adducin 3 (gamma)	AI763123	120	Hs.324470.1	1000.21	1779.49	1.78	1.67	1.9	779.28	16.551	3e-06	1000.21	1311.55	1.31	0.81	1.83	311.34	1.01	0.385167	1100.17	949.3	983.67	967.71	1819.84	1740.77	1847.82	1709.53	672.12	904.32	1876	1793.77
201753_s_at	ADD3: adducin 3 (gamma)	NM_019903	120	g9951926	1296.31	2206.97	1.7	1.61	1.8	910.65	15.763	1.1e-05	1296.31	1598.97	1.23	0.87	1.6	302.66	1.068	0.362059	1385.4	1260.72	1303.98	1235.16	2098.15	2181.19	2221.88	2326.64	1021.45	1230.01	2201.95	1942.46
201754_at	COX6C: cytochrome c oxidase subunit VIc	NM_004374	1345	g4758039	11296.9	12969.6	1.15	1.08	1.21	1672.67	3.847	0.029325	11296.9	11756.9	1.04	1.03	1.06	459.99	4.292	0.008255	11373.8	11396.7	11162.8	11254.3	13801.8	13614.2	12099.3	12363	11830.9	11964.1	11532.1	11700.5
201755_at	MCM5: minichromosome maintenance complex component 5	NM_006739	4174	g6981191	944.96	765.25	-1.23	-1.13	-1.36	-179.71	-3.725	0.010133	944.96	1021.72	1.08	0.89	1.28	76.76	0.684	0.534331	869.46	896.12	1000.82	1013.45	688.6	738.97	807.7	825.74	1338.36	887.21	941.07	920.26
201756_at	RPA2: replication protein A2, 32kDa	NM_002946	6118	g4506584	2718.59	2389.47	-1.14	-0.95	-1.41	-329.12	-1.16	0.328502	2718.59	2596.66	-1.05	-0.99	-1.11	-121.93	-1.346	0.255363	2800.62	2715.01	2688.53	2670.2	1900.11	1906.47	2949.17	2802.14	2765.83	2722.95	2438.22	2459.63
201757_at	NDUFS5: NADH dehydrogenase (ubiquinone) Fe-S protein 5, 15kDa (NADH-coenzyme Q reductase)	NM_004552	4725	g4758789	10574.4	11602.8	1.1	1.07	1.12	1028.42	6.706	0.000695	10574.4	10956.5	1.04	0.99	1.08	382.13	1.332	0.258868	10590	10344.1	10562.4	10801.1	11817.6	11781.8	11510	11301.9	10326.1	10918.8	10929.9	11651.5
201758_at	TSG101: tumor susceptibility gene 101	NM_006292	7251	g5454139	2099.06	2303.97	1.1	0.92	1.28	204.91	0.88	0.440437	2099.06	2241.82	1.07	0.92	1.22	142.76	0.757	0.499736	2181.53	2150.67	2033.82	2030.22	2705.8	2695.21	1866.49	1948.39	2070.66	1802.92	2546.48	2547.21
201759_at	TBCD: tubulin folding cofactor D	AW247323	6904	Hs.12570.0	409.42	483.55	1.18	0.96	1.4	74.13	1.368	0.262744	409.42	514.32	1.26	1.22	1.3	104.91	11.441	3.3e-05	399.45	416.26	422.48	399.48	375.83	408.85	552.48	597.03	527.26	514.79	520.6	494.66
201760_s_at	WSB2: WD repeat and SOCS box-containing 2	NM_018639	55884	g8923880	1526.77	1793.63	1.17	1.02	1.33	266.86	1.845	0.157901	1526.77	1958.98	1.28	1.18	1.38	432.2	4.805	0.012838	1499.35	1482.17	1581.56	1544.01	1997.18	2078.73	1587.55	1511.08	2213.89	1906.38	1895.34	1820.29
201761_at	MTHFD2: methylenetetrahydrofolate dehydrogenase (NADP+ dependent) 2, methenyltetrahydrofolate cyclohydrolase	NM_006636	10797	g13699869	5642.74	6065.84	1.07	0.92	1.27	423.1	0.752	0.484103	5642.74	7991.6	1.42	1.24	1.65	2348.86	4.604	0.008781	4937.37	4795.66	6696.62	6141.31	5514.41	5562.94	6832.91	6353.1	7540.86	8040.24	7829.93	8555.37
201762_s_at	PSME2: proteasome (prosome, macropain) activator subunit 2 (PA28 beta)	NM_002818	5721	g4506236	4797.62	6049.07	1.26	1.2	1.32	1251.45	8.047	0.000198	4797.62	4733.27	-1.01	-0.94	-1.09	-64.35	-0.305	0.772891	5031.17	4940.19	4569.01	4650.1	5841.33	6053.8	5953.68	6347.48	5052.1	5032.54	4471.07	4377.36
201763_s_at	DAXX: death-associated protein 6	NM_001350	1616	g4503256	1218.08	1289.01	1.06	0.96	1.17	70.93	0.943	0.385046	1218.08	1178.24	-1.03	-0.92	-1.16	-39.83	-0.484	0.648108	1265.31	1302.21	1097.42	1207.37	1423.83	1355.42	1211.62	1165.17	1234.89	971.64	1247.86	1258.59
201764_at	TMEM106C: transmembrane protein 106C	NM_024056	79022	g13129025	3612.41	4718.91	1.31	1.23	1.38	1106.5	6.719	0.004434	3612.41	3745.27	1.04	0.99	1.08	132.86	1.332	0.250368	3652.67	3487.15	3650.03	3659.79	4570.11	4340.42	4987.34	4977.77	3499.47	3936.52	3775.51	3769.56
201765_s_at	HEXA: hexosaminidase A (alpha polypeptide)	AL523158	3073	Hs.119403.0	638.48	819.86	1.28	1.1	1.47	181.38	2.595	0.066754	638.48	632.82	-1.01	-0.91	-1.12	-5.66	-0.146	0.889542	696.38	596.71	642.88	617.96	750.16	667.94	948.1	913.24	536.86	653.95	663.17	677.31
201767_s_at	ELAC2: elaC homolog 2 (E. coli)	NM_018127	60528	g11875212	2681.72	2385.21	-1.12	-1	-1.27	-296.51	-1.696	0.170433	2681.72	2631.63	-1.02	-0.95	-1.09	-50.1	-0.459	0.665241	2668.8	2611.27	2597.77	2849.05	2189.1	2027.59	2602.4	2721.77	2640.4	2381.41	2678.81	2825.89
201768_s_at	CLINT1: clathrin interactor 1	BC004467	9685	g13325306	779.88	474.48	-1.64	-1.46	-1.86	-305.4	-7.632	0.000312	779.88	411.86	-1.89	-1.58	-2.35	-368.02	-6.869	0.001371	840.8	798.94	755.93	723.84	542.31	510.36	431.53	413.72	321.72	539.5	420.81	365.42
201769_at	CLINT1: clathrin interactor 1	NM_014666	9685	g7661967	2908.9	1757.08	-1.66	-1.4	-1.98	-1151.82	-5.104	0.002278	2908.9	2289.26	-1.27	-1	-1.7	-619.64	-1.649	0.167927	3293.24	3081.24	2673.55	2587.56	1983.04	2052.19	1520.2	1472.88	3090.96	2598.97	1760.45	1706.64
201770_at	SNRPA: small nuclear ribonucleoprotein polypeptide A	NM_004596	6626	g4759155	3134.71	2679	-1.17	-1.04	-1.34	-455.71	-2.193	0.111868	3134.71	3304.48	1.05	1	1.11	169.77	1.683	0.174416	3113.65	3101.15	3095.04	3228.98	2421.87	2237.51	3051.86	3004.76	3470.52	3469.54	3125.28	3152.56
201771_at	SCAMP3: secretory carrier membrane protein 3	NM_005698	10067	g5032076	1327.09	1036.32	-1.28	-0.97	-1.87	-290.77	-1.444	0.235629	1327.09	1531.44	1.15	1.01	1.31	204.36	1.711	0.161536	1269.34	1227.77	1390.37	1420.86	734.66	662.16	1399.4	1349.05	1639.75	1202.92	1616.16	1666.94
201772_at	AZIN1: antizyme inhibitor 1	NM_015878	51582	g7706219	2121.51	2246.34	1.06	0.94	1.19	124.83	0.78	0.484237	2121.51	1290.3	-1.64	-1.24	-2.43	-831.21	-3.227	0.044053	2127.12	1994.62	2218.63	2145.66	2016.83	1957.17	2432.67	2578.7	1636.95	1809.86	906.6	807.79
201773_at	ADNP: activity-dependent neuroprotector homeobox	NM_015339	23394	g12229216	1497.08	1698.13	1.13	1.01	1.26	201.05	1.826	0.151553	1497.08	1540.84	1.03	0.74	1.32	43.76	0.166	0.878105	1588.41	1472.33	1480.16	1447.43	1433.85	1624.82	1894.85	1839.03	930.56	1282.18	1957.72	1992.89
201774_s_at	NCAPD2: non-SMC condensin I complex, subunit D2	AK022511	9918	Hs.5719.0	887.68	1241.51	1.4	1.33	1.47	353.84	10.993	0.000169	887.68	965.18	1.09	0.95	1.23	77.51	1.02	0.377227	870.46	861.64	931.03	887.58	1266.86	1284.14	1158.5	1256.55	1164.86	990.82	837.31	867.75
201775_s_at	KIAA0494: KIAA0494	AA676790	9813	Hs.62515.0	205.66	207.55	1.01	0.88	1.15	1.89	0.114	0.913178	205.66	146.01	-1.41	-1.09	-1.95	-59.65	-2.237	0.081873	238.31	209.66	184.52	190.16	203.16	199.02	240.27	187.77	142.76	214.12	111.27	115.89
201776_s_at	KIAA0494: KIAA0494	AK001487	9813	Hs.62515.0	587.64	590.51	1	0.86	1.17	2.86	0.052	0.960069	587.64	371.88	-1.58	-1.24	-2.1	-215.76	-3.343	0.019063	658.53	638.82	540.69	512.52	514.19	525.24	676.59	646	450.06	478.35	279.86	279.27
201777_s_at	KIAA0494: KIAA0494	BC002525	9813	g12803404	446.82	532.81	1.19	1	1.41	85.99	1.664	0.155919	446.82	312.06	-1.43	-1.09	-2.01	-134.75	-2.249	0.079921	527.52	439.6	412.96	407.19	483.09	458.42	654.29	535.42	395.13	408.65	249.13	195.35
201778_s_at	KIAA0494: KIAA0494	NM_014774	9813	g7662159	3911.12	3740.67	-1.05	-0.94	-1.15	-170.46	-0.742	0.50809	3911.12	2968.16	-1.32	-1.04	-1.76	-942.96	-1.913	0.120702	4451.22	4112.46	3539.67	3541.13	3729.86	3800.74	3820.75	3611.31	3734.62	3721.04	2199.72	2217.26
201779_s_at	RNF13: ring finger protein 13	AF070558	11342	g3387924	1329.3	1442.19	1.08	0.93	1.25	112.89	0.884	0.429444	1329.3	1365.15	1.03	0.91	1.15	35.85	0.369	0.729399	1459.46	1284.03	1292.38	1281.32	1734.25	1543.25	1257.3	1233.95	1143.51	1314.19	1470.31	1532.59
201780_s_at	RNF13: ring finger protein 13	NM_007282	11342	g6005863	974.15	941.61	-1.03	-0.95	-1.12	-32.54	-0.7	0.513456	974.15	946.38	-1.03	-0.94	-1.13	-27.77	-0.508	0.629897	1005.56	1067.63	900.17	923.23	975.12	996.17	889.24	905.91	875.91	962.61	1049.12	897.88
201781_s_at	AIP: aryl hydrocarbon receptor interacting protein	AL558532	9049	Hs.75305.0	787.29	786.26	-1	-0.9	-1.12	-1.02	-0.019	0.985284	787.29	715.93	-1.1	-0.89	-1.43	-71.35	-0.686	0.534325	725.29	857.4	746.05	820.4	909.3	782.35	724.19	729.2	429.5	735.13	852.12	846.98
201782_s_at	AIP: aryl hydrocarbon receptor interacting protein	NM_003977	9049	g4502008	1293.1	1313.66	1.02	0.93	1.11	20.56	0.295	0.77888	1293.1	1427.87	1.1	1.03	1.18	134.77	2.396	0.053652	1237.62	1210.58	1346.96	1377.24	1465.75	1332.94	1238.77	1217.19	1355.08	1370.51	1470.24	1515.63
201783_s_at	RELA: v-rel reticuloendotheliosis viral oncogene homolog A, nuclear factor of kappa light polypeptide gene enhancer in B-cells 3, p65 (avian)	NM_021975	5970	g11496238	1916.07	1453.27	-1.32	-1.02	-1.86	-462.8	-1.8	0.167178	1916.07	1825.51	-1.05	-0.92	-1.22	-90.56	-0.572	0.60473	1952.29	1879.52	1851.42	1981.04	1828.09	1957.91	997.9	1029.18	1719.14	1435.03	2038.83	2109.05
201784_s_at	C11orf58: chromosome 11 open reading frame 58	NM_014267	10944	g7657233	6278.34	6492.87	1.03	1.02	1.05	214.53	3.864	0.009419	6278.34	6067.78	-1.03	-0.91	-1.2	-210.56	-0.416	0.705215	6354.41	6281.41	6189.69	6287.86	6497.19	6513.43	6374.37	6586.48	4574.39	6790.05	6533.29	6373.41
201786_s_at	ADAR: adenosine deaminase, RNA-specific	NM_001111	103	g7669471	5434.32	4621.72	-1.18	-0.99	-1.45	-812.6	-1.505	0.218749	5434.32	6572.87	1.21	1.15	1.27	1138.55	6.864	0.000744	5736.12	5090.82	5380.69	5529.67	3710.84	3732.42	5654.25	5389.39	6794.8	6423.54	6404.4	6668.75
201788_at	DDX42: DEAD (Asp-Glu-Ala-Asp) box polypeptide 42	NM_007372	11325	g11321631	1671.92	2062.64	1.23	1.1	1.37	390.72	2.927	0.051715	1671.92	2057.68	1.23	1.09	1.38	385.76	2.678	0.066275	1620.81	1610.76	1759.8	1696.31	2239.15	2327.35	1860.12	1823.93	1754.37	1893.14	2237.88	2345.33
201790_s_at	DHCR7: 7-dehydrocholesterol reductase	AW150953	1717	Hs.11806.0	662.6	434.88	-1.52	-1.38	-1.67	-227.72	-5.951	0.007321	662.6	567.29	-1.17	-0.97	-1.44	-95.31	-1.339	0.238158	569.64	636.46	735.63	708.68	426.19	417.8	440.93	454.59	482.6	444.04	669.42	673.11
201791_s_at	DHCR7: 7-dehydrocholesterol reductase	NM_001360	1717	g4503320	1535.43	1067.08	-1.44	-1.31	-1.58	-468.35	-6.645	0.000588	1535.43	1350.11	-1.14	-1.01	-1.29	-185.32	-1.812	0.131032	1431.67	1467.6	1659.41	1583.05	971.93	1000.44	1151.77	1144.19	1267.49	1141.91	1502.95	1488.1
201792_at	AEBP1: AE binding protein 1	NM_001129	165	g4755145	1220.98	595.6	-2.05	-1.81	-2.36	-625.38	-12.578	0.0003	1220.98	717.97	-1.7	-1.58	-1.84	-503	-13.774	6.3e-05	1223.45	1171.02	1245.83	1243.6	509.18	523.38	694.48	655.36	805.92	724.02	661.38	680.58
201793_x_at	SMG7: Smg-7 homolog, nonsense mediated mRNA decay factor (C. elegans)	BF509099	9887	Hs.15087.0	588.05	666.77	1.13	0.97	1.32	78.72	1.329	0.234629	588.05	667.14	1.13	1	1.3	79.1	1.601	0.161013	526.1	545.05	690.61	590.42	670.5	536.24	750.37	709.97	615.99	620.72	673.85	758.01
201794_s_at	SMG7: Smg-7 homolog, nonsense mediated mRNA decay factor (C. elegans)	NM_014837	9887	g7662023	1091.58	1109.8	1.02	0.9	1.14	18.22	0.225	0.83261	1091.58	1430.52	1.31	1.17	1.46	338.94	3.642	0.024111	1035.47	1037.35	1150.96	1142.55	1056.78	925.04	1251.45	1205.93	1660.38	1282.31	1307.29	1472.09
201795_at	LBR: lamin B receptor	NM_002296	3930	g4504960	5859.55	5417.14	-1.08	-1.04	-1.12	-442.42	-3.396	0.020699	5859.55	5538.37	-1.06	-0.99	-1.13	-321.19	-1.461	0.205038	6089.92	6003.27	5741.14	5603.88	5528.41	5529.72	5290.36	5320.06	5361.44	5094.38	5903.34	5794.31
201797_s_at	VARS: valyl-tRNA synthetase	NM_006295	7407	g5454157	750.18	515.95	-1.45	-1.35	-1.58	-234.24	-8.566	0.000229	750.18	626.66	-1.2	-1.08	-1.34	-123.52	-2.921	0.043513	720.9	724.07	778.38	777.39	536.58	568.09	486.78	472.34	685.96	514.88	630.58	675.21
201799_s_at	OSBP: oxysterol binding protein	AI927993	5007	Hs.24734.0	305.33	283.34	-1.08	-0.91	-1.3	-21.98	-0.714	0.515103	305.33	274.64	-1.11	-0.92	-1.39	-30.69	-0.906	0.419269	304.36	275.87	309.04	332.04	241.79	227.5	341.85	322.23	192.5	260.07	306.31	339.66
201800_s_at	OSBP: oxysterol binding protein	AF185696	5007	g10441379	1490.38	1392.26	-1.07	-1.01	-1.13	-98.12	-1.835	0.155308	1490.38	1522.54	1.02	0.94	1.11	32.17	0.416	0.692216	1599.08	1548.99	1447.93	1365.51	1406.57	1416.13	1363.92	1382.42	1380.87	1504.36	1657.36	1547.58
201801_s_at	SLC29A1: solute carrier family 29 (nucleoside transporters), member 1	AF079117	2030	g3694939	92.33	47.12	-1.96	-1.55	-2.55	-45.21	-4.902	0.002842	92.33	97.85	1.06	0.79	1.37	5.52	0.345	0.746356	74.22	100.27	105.66	89.17	51.74	59.63	46.2	30.9	136.67	99.97	68.86	85.89
201802_at	SLC29A1: solute carrier family 29 (nucleoside transporters), member 1	NM_004955	2030	g4826715	249.78	115.06	-2.17	-1.84	-2.62	-134.72	-9.222	0.00012	249.78	347.94	1.39	0.82	1.98	98.16	1.127	0.340274	265.83	247.35	260.94	225.01	127.08	134.66	115.56	82.96	606.21	289.48	250.41	245.67
201803_at	POLR2B: polymerase (RNA) II (DNA directed) polypeptide B, 140kDa	NM_000938	5431	g4505940	4926.55	5204.61	1.06	1.01	1.11	278.06	1.927	0.105483	4926.55	5009.81	1.02	0.95	1.08	83.26	0.43	0.687013	5028.13	4666.84	5037.85	4973.39	5434.92	5360.53	5063.64	4959.34	4592.17	4891.05	5167.18	5388.85
201804_x_at	TBCB: tubulin folding cofactor B	NM_001281	1155	g4502848	2379.56	2469.03	1.04	0.75	1.34	89.47	0.211	0.845051	2379.56	2975.11	1.25	1.11	1.4	595.55	3.146	0.022227	2376.41	2068.63	2481.34	2591.88	3304.01	3040.86	1751	1780.27	2652.68	2779.34	3209.52	3258.91
201805_at	PRKAG1: protein kinase, AMP-activated, gamma 1 non-catalytic subunit	NM_002733	5571	g4506060	1473.24	1401.01	-1.05	-0.98	-1.13	-72.23	-1.107	0.344552	1473.24	1582.84	1.07	0.95	1.21	109.59	0.986	0.366416	1594.84	1561.17	1318.55	1418.42	1418.47	1369.45	1397.04	1419.1	1821.42	1599.7	1387.7	1522.52
201806_s_at	ATXN2L: ataxin 2-like	NM_007245	11273	g6005698	75.94	52.38	-1.45	-1.17	-1.87	-23.55	-2.958	0.03179	75.94	143.71	1.89	0.8	3.02	67.77	1.34	0.271696	71.68	66.38	83.97	81.72	47.95	35.47	59.96	66.17	293.18	84.64	81.42	115.58
201807_at	VPS26A: vacuolar protein sorting 26 homolog A (S. pombe)	NM_004896	9559	g4758509	1623.64	1477.39	-1.1	-1.03	-1.17	-146.25	-2.222	0.093994	1623.64	3047.77	1.88	1.74	2.03	1424.13	14.322	1.1e-05	1741.32	1692.52	1600.36	1460.38	1431.19	1478.65	1539.08	1460.64	3107.46	2835.6	3203.56	3044.48
201810_s_at	SH3BP5: SH3-domain binding protein 5 (BTK-associated)	AL562152	9467	Hs.109150.0	871.16	1000.51	1.15	0.86	1.49	129.34	0.815	0.453177	871.16	659.66	-1.32	-1.12	-1.52	-211.5	-2.624	0.077119	764.29	703.98	996.74	1019.64	1235.63	1238.74	743.25	784.4	656.1	644.58	682.54	655.43
201811_x_at	SH3BP5: SH3-domain binding protein 5 (BTK-associated)	NM_004844	9467	g4759057	1685.17	1843.31	1.09	0.84	1.41	158.13	0.578	0.584354	1685.17	1324.26	-1.27	-1.04	-1.51	-360.91	-1.959	0.139822	1686.29	1172.18	1967.51	1914.7	2199.08	2195.74	1488.46	1489.94	1251.46	1400.78	1302.68	1342.13
201812_s_at	LOC201725 /// TOMM7: translocase of outer mitochondrial membrane 7 homolog (yeast) /// hypothetical protein LOC201725	NM_019059	201725 /// 54543	g9506858	4810.12	5106.23	1.06	1.01	1.12	296.11	1.995	0.127963	4810.12	5165.13	1.07	1	1.16	355.01	1.585	0.165605	5026.07	5080.7	4505.15	4628.55	5041.61	5163.29	5184.39	5035.63	4819.57	4923.05	5408.03	5509.88
201813_s_at	TBC1D5: TBC1 domain family, member 5	AI654161	9779	Hs.115740.0	673.82	700.43	1.04	0.69	1.41	26.61	0.182	0.866042	673.82	791.59	1.17	0.95	1.43	117.77	1.245	0.278248	787.63	663.72	627.47	616.46	480.94	433.21	919.15	968.42	697.89	596.21	926	946.27
201814_at	TBC1D5: TBC1 domain family, member 5	AI300084	9779	Hs.115740.0	1792.38	1692.86	-1.06	-0.78	-1.61	-99.52	-0.275	0.798854	1792.38	1872.38	1.04	0.8	1.31	80	0.292	0.785017	1960.83	1952.56	1679.41	1576.72	1086.79	1103.62	2409.55	2171.47	1412.37	1458.58	2409.14	2209.43
201815_s_at	TBC1D5: TBC1 domain family, member 5	NM_014744	9779	g7661997	62.19	67.59	1.09	0.84	1.38	5.4	0.545	0.608193	62.19	63.69	1.02	0.81	1.28	1.49	0.169	0.871554	71.19	70.03	47.84	59.7	52.37	56.86	88.87	72.26	58.29	47.5	69.07	79.89
201816_s_at	GBAS: glioblastoma amplified sequence	NM_001483	2631	g4503936	2990.48	1592.12	-1.88	-1.35	-3.06	-1398.35	-3.685	0.030925	2990.48	2154.46	-1.39	-0.99	-2.33	-836.02	-1.568	0.211914	2955.82	2861.18	3187.88	2957.04	2279.97	2194.37	914.78	979.37	3099.33	3040.39	1252.91	1225.21
201817_at	UBE3C: ubiquitin protein ligase E3C	NM_014671	9690	g7661855	1138.63	1292.99	1.14	0.76	1.51	154.36	0.594	0.594225	1138.63	1156.38	1.02	0.93	1.1	17.75	0.313	0.771789	1157.79	1123.77	1170.99	1101.98	1719.17	1764.68	821.47	866.65	999.19	1167.55	1226.08	1232.7
201818_at	LPCAT1: lysophosphatidylcholine acyltransferase 1	NM_024830	79888	g13376233	1870.25	1758.42	-1.06	-0.93	-1.23	-111.83	-0.748	0.491986	1870.25	1814	-1.03	-0.95	-1.12	-56.25	-0.637	0.548286	1785.62	1726.35	1973.11	1995.9	1526.42	1534.94	2041.68	1930.64	1660.02	1795.52	1915.16	1885.28
201819_at	SCARB1: scavenger receptor class B, member 1	NM_005505	949	g5031628	651.7	437.45	-1.49	-1.1	-2.3	-214.24	-2.28	0.104652	651.7	679.92	1.04	0.86	1.23	28.23	0.391	0.720804	647	673.34	623.83	662.62	272.55	279.23	607.28	590.75	588.31	528.17	808.78	794.43
201821_s_at	TIMM17A: translocase of inner mitochondrial membrane 17 homolog A (yeast)	BC004439	10440	g13325239	3857.55	3259.8	-1.18	-1.01	-1.43	-597.75	-1.716	0.178515	3857.55	3809.6	-1.01	-0.9	-1.15	-47.95	-0.171	0.874147	3671.19	3866.92	3961.91	3930.17	3713.71	3976.76	2681.37	2667.34	3009.83	4225.9	3941.37	4061.32
201822_at	TIMM17A: translocase of inner mitochondrial membrane 17 homolog A (yeast)	NM_006335	10440	g5454119	102.45	73.15	-1.4	-1.15	-1.71	-29.3	-2.828	0.031194	102.45	122.41	1.19	1.05	1.38	19.96	2.361	0.082602	92.95	107.49	122.57	86.8	86.82	81.95	60.16	63.67	119.68	129.97	117.14	122.85
201823_s_at	RNF14: ring finger protein 14	NM_004290	9604	g4757761	615.19	658.44	1.07	0.93	1.21	43.25	0.841	0.459948	615.19	581.32	-1.06	-0.96	-1.18	-33.87	-0.906	0.428024	631.43	616.3	598.12	614.93	756.52	729.46	606.92	540.86	481.62	571.27	645.49	626.9
201824_at	RNF14: ring finger protein 14	AB022663	9604	g5019617	956.7	1039.05	1.09	0.96	1.21	82.35	1.147	0.31165	956.7	1050.95	1.1	1	1.2	94.25	1.702	0.147118	952.82	945.15	1038.36	890.47	1119.46	1175.57	962.39	898.77	1107.62	1148.35	996.44	951.4
201825_s_at	SCCPDH: saccharopine dehydrogenase (putative)	AL572542	51097	Hs.238126.0	2248.23	2882.37	1.28	1.1	1.46	634.14	2.583	0.081455	2248.23	1885.62	-1.19	-0.94	-1.64	-362.61	-1.165	0.328221	2227.77	2247.5	2258.62	2259.03	3303.14	3310.96	2430.55	2484.84	1241.13	1464.26	2444.59	2392.51
201826_s_at	SCCPDH: saccharopine dehydrogenase (putative)	NM_016002	51097	g7705766	931.89	1341.65	1.44	1.28	1.62	409.77	5.166	0.002245	931.89	1131.95	1.21	0.91	1.54	200.06	1.164	0.315947	864.55	857.11	1078.82	927.07	1449.42	1437.01	1205.22	1274.97	849.73	847.99	1447.47	1382.61
201827_at	SMARCD2: SWI/SNF related, matrix associated, actin dependent regulator of chromatin, subfamily d, member 2	AF113019	6603	g6642761	927.39	671.81	-1.38	-1.25	-1.53	-255.58	-5.484	0.001547	927.39	1162.67	1.25	1.1	1.42	235.27	2.685	0.054796	969.87	997.81	855.61	886.28	600.91	633.85	731.86	720.64	1128.84	947.4	1289.23	1285.2
201828_x_at	FAM127A: family with sequence similarity 127, member A	NM_003928	8933	g4503180	56.48	77.57	1.37	1.11	1.73	21.08	2.502	0.046831	56.48	61.44	1.09	0.8	1.45	4.96	0.469	0.657209	48.59	44.51	60.57	72.25	82.34	62.31	76.87	88.74	55.65	46.93	57.05	86.15
201829_at	NET1: neuroepithelial cell transforming gene 1	AW263232	10276	Hs.25155.0	1586.7	1443.16	-1.1	-0.95	-1.31	-143.54	-1.003	0.388186	1586.7	1456.83	-1.09	-0.94	-1.3	-129.87	-0.914	0.426515	1555.49	1583.61	1629.26	1578.44	1150.8	1314.95	1491.4	1815.48	1522.17	1776.88	1434.79	1093.49
201830_s_at	NET1: neuroepithelial cell transforming gene 1	NM_005863	10276	g5031938	1238.68	1156.44	-1.07	-0.95	-1.22	-82.24	-0.953	0.3904	1238.68	1024.17	-1.21	-1.08	-1.37	-214.52	-2.807	0.03957	1227.48	1241.65	1335.51	1150.09	1065.52	988.09	1316.2	1255.96	916.39	1216.95	969.32	994.01
201831_s_at	USO1: USO1 homolog, vesicle docking protein (yeast)	BE875592	8615	Hs.325948.0	675.17	789.09	1.17	0.88	1.46	113.92	0.974	0.399851	675.17	710.13	1.05	0.98	1.12	34.96	1.225	0.275766	677.71	635.4	707.26	680.32	1011.15	965.97	615.56	563.68	653.02	769.65	721.73	696.11
201832_s_at	USO1: USO1 homolog, vesicle docking protein (yeast)	NM_003715	8615	g4505540	1334.86	1488.29	1.11	0.88	1.35	153.43	0.817	0.469375	1334.86	1423.25	1.07	1	1.14	88.39	1.695	0.14151	1421.35	1345.24	1339.13	1233.71	1842.78	1765.05	1217.08	1128.23	1496.91	1465.74	1344.81	1385.53
201833_at	HDAC2: histone deacetylase 2	NM_001527	3066	g4557640	4748.68	4596.35	-1.03	-0.98	-1.09	-152.34	-0.955	0.379238	4748.68	4985.47	1.05	0.96	1.15	236.79	0.858	0.433781	4612.06	4476.69	5053.22	4852.77	4719.17	4775.54	4355.33	4535.35	4661.32	4494.92	5533.24	5252.4
201834_at	PRKAB1: protein kinase, AMP-activated, beta 1 non-catalytic subunit	BC001007	5564	g12654368	946.8	688.54	-1.38	-1.16	-1.69	-258.25	-3.213	0.040074	946.8	1014.68	1.07	0.99	1.16	67.89	1.394	0.230479	971.17	941.38	985.53	889.11	793.59	847.86	575.05	537.67	1144.88	955.17	975.38	983.3
201835_s_at	PRKAB1: protein kinase, AMP-activated, beta 1 non-catalytic subunit	NM_006253	5564	g5453967	158.79	114.2	-1.39	-1.15	-1.73	-44.59	-2.948	0.030074	158.79	125.24	-1.27	-1.02	-1.64	-33.56	-1.817	0.135622	152.87	154.5	144.52	183.29	128.49	138.45	108.25	81.62	81.29	160.25	134.14	125.27
201836_s_at	SUPT7L: suppressor of Ty 7 (S. cerevisiae)-like	AU154740	9913	Hs.6232.0	119.13	138.74	1.16	1.03	1.32	19.62	1.961	0.098399	119.13	176.82	1.48	1.26	1.74	57.7	3.691	0.019008	111.25	115.11	138.68	111.46	141.98	155.87	137.79	119.34	163.25	154.73	218.17	171.15
201837_s_at	SUPT7L: suppressor of Ty 7 (S. cerevisiae)-like	AF197954	9913	g11066257	749.35	947.03	1.26	1.12	1.41	197.68	3.01	0.055794	749.35	924.95	1.23	1.12	1.35	175.59	3.356	0.041867	745.46	734.25	765.55	752.14	803.29	869.31	1053.9	1061.63	804.34	873.56	997.48	1024.4
201838_s_at	SUPT7L: suppressor of Ty 7 (S. cerevisiae)-like	NM_014860	9913	g7662291	215.82	224.99	1.04	0.94	1.15	9.17	0.657	0.549427	215.82	302.76	1.4	1.24	1.57	86.94	4.136	0.021181	214.71	224.78	220.49	203.31	222.87	191.34	255.17	230.6	345.6	254.34	284.97	326.13
201840_at	NEDD8: neural precursor cell expressed, developmentally down-regulated 8	NM_006156	4738	g5453759	4055.87	5177	1.28	1.15	1.41	1121.13	3.742	0.013695	4055.87	3924.79	-1.03	-0.95	-1.12	-131.08	-0.638	0.547237	3848.49	3739.81	4249.83	4385.36	5744.65	5476.47	4742.4	4744.49	3523.46	4092.36	4029.38	4053.96
201841_s_at	HSPB1: heat shock 27kDa protein 1	NM_001540	3315	g4996892	514.95	592.62	1.15	1.08	1.23	77.67	3.561	0.014268	514.95	500.05	-1.03	-0.89	-1.21	-14.91	-0.32	0.764703	483.83	484.47	542.66	548.85	613.44	557.12	606.79	593.13	553.59	373.48	554.06	519.06
201842_s_at	EFEMP1: EGF-containing fibulin-like extracellular matrix protein 1	AI826799	2202	Hs.76224.0	2481.38	776.7	-3.19	-2.9	-3.55	-1704.69	-23.534	1e-06	2481.38	911.46	-2.72	-2.34	-3.25	-1569.92	-14.871	2e-05	2612.76	2496.76	2484.26	2331.76	842.75	861.8	705.4	696.82	1068.63	1059.78	774.23	743.21
201843_s_at	EFEMP1: EGF-containing fibulin-like extracellular matrix protein 1	NM_004105	2202	g9665261	276.51	78.69	-3.51	-2.88	-4.38	-197.83	-10.446	0.000259	276.51	98.06	-2.82	-2.32	-3.51	-178.45	-8.927	0.000265	299.81	306.54	266.27	233.43	89.47	92.85	77.84	54.58	120.43	112.12	83.62	76.07
201844_s_at	RYBP: RING1 and YY1 binding protein	W84482	23429	Hs.7910.0	697.1	880.4	1.26	1.07	1.46	183.29	2.304	0.093088	697.1	728.07	1.04	0.96	1.13	30.96	0.853	0.4298	652.93	678.68	751.56	705.25	1013.93	1011.03	768.5	728.13	640.66	750.35	771.48	749.78
201845_s_at	RYBP: RING1 and YY1 binding protein	AB029551	23429	g6714542	1292.7	1486.22	1.15	0.99	1.31	193.52	1.507	0.225757	1292.7	1430.68	1.11	1.07	1.15	137.98	4.468	0.005621	1321.1	1282.26	1320.05	1247.39	1784.14	1607	1317.41	1236.33	1384.72	1474.43	1474.77	1388.78
201846_s_at	RYBP: RING1 and YY1 binding protein	NM_012234	23429	g6912639	508.19	690.56	1.36	1.17	1.55	182.38	3.075	0.051654	508.19	540.67	1.06	0.94	1.19	32.49	0.877	0.439678	488.72	507.71	528.97	507.34	825.09	752.92	595.94	588.31	438.51	588.82	594.67	540.69
201847_at	LIPA: lipase A, lysosomal acid, cholesterol esterase (Wolman disease)	NM_000235	3988	g4557720	1365.47	1687.86	1.24	1.18	1.3	322.4	7.815	0.001188	1365.47	1435.44	1.05	0.75	1.36	69.97	0.278	0.798124	1348.61	1282.07	1463.79	1367.4	1725.98	1690.57	1692.13	1642.77	952.17	1063.65	1909.26	1816.66
201848_s_at	BNIP3: BCL2/adenovirus E1B 19kDa interacting protein 3	U15174	664	g558845	1936.75	2213.13	1.14	1.06	1.23	276.38	2.969	0.02781	1936.75	1605.5	-1.21	-0.84	-2.09	-331.25	-0.794	0.481763	2042.95	1977.58	2011.67	1714.81	2366.61	2213.18	2156.57	2116.16	614.7	1288.67	2462.83	2055.8
201849_at	BNIP3: BCL2/adenovirus E1B 19kDa interacting protein 3	NM_004052	664	g7669480	2066.04	2502.23	1.21	1.13	1.31	436.2	4.561	0.00995	2066.04	1932.61	-1.07	-0.78	-1.69	-133.42	-0.306	0.777942	2174.35	2065.98	2205.77	1818.05	2596.26	2529.79	2437.74	2445.15	1030.65	1401.78	2825.7	2472.31
201850_at	CAPG: capping protein (actin filament), gelsolin-like	NM_001747	822	g4502560	1430.74	987.21	-1.45	-1.37	-1.54	-443.53	-11.399	7.2e-05	1430.74	948.99	-1.51	-1.36	-1.7	-481.75	-7.256	0.002611	1492.63	1405.1	1399.59	1425.64	1072.16	996.82	961.17	918.68	859.68	845.19	974.77	1116.31
201851_at	SH3GL1: SH3-domain GRB2-like 1	NM_003025	6455	g4506928	333.51	384.36	1.15	1.02	1.29	50.85	1.963	0.124099	333.51	447.93	1.34	1.14	1.55	114.43	2.769	0.062371	317.66	359.43	324.63	332.29	356.74	337.9	395.11	447.68	568.18	401.41	419.81	402.33
201853_s_at	CDC25B: cell division cycle 25 homolog B (S. pombe)	NM_021873	994	g11641412	1437.77	1506.81	1.05	0.57	1.53	69.03	0.164	0.880354	1437.77	1842.03	1.28	1.16	1.41	404.26	3.784	0.028479	1480.95	1403.4	1464.23	1402.5	2240.99	2230.51	825.46	730.27	2107.39	1903.37	1631.7	1725.67
201854_s_at	ATMIN: ATM interactor	AI744148	23300	Hs.16349.0	561.4	433.64	-1.29	-1.14	-1.46	-127.76	-3.294	0.025327	561.4	560.16	-1	-0.89	-1.13	-1.24	-0.03	0.977063	644.92	554.63	569.31	476.73	445.79	478.09	411.52	399.14	618.85	513.66	543.78	564.34
201855_s_at	ATMIN: ATM interactor	NM_015251	23300	g7662115	1063.35	795.46	-1.34	-1.14	-1.62	-267.89	-3.104	0.048291	1063.35	1145.07	1.08	1.01	1.14	81.72	1.947	0.122729	1034.5	1110.28	1054.84	1053.79	899.82	977.26	626.76	678.02	1212.88	1190.69	1137.49	1039.22
201856_s_at	ZFR: zinc finger RNA binding protein	BC000376	51663	g12653216	436.85	501.93	1.15	0.89	1.44	65.08	0.918	0.409729	436.85	444.89	1.02	0.88	1.18	8.05	0.205	0.844525	388.56	389.53	496.84	472.46	627	600.64	405.22	374.84	366.69	487.21	446.43	479.24
201857_at	ZFR: zinc finger RNA binding protein	NM_016107	51663	g7706372	2903.63	3223.29	1.11	0.91	1.32	319.66	0.885	0.435144	2903.63	3490.06	1.2	1.13	1.28	586.43	4.715	0.003333	2976.26	2695.89	3088.73	2853.65	3955.53	3693.12	2640.83	2603.66	3303.85	3364.17	3621.5	3670.72
201858_s_at	SRGN: serglycin	J03223	5552	g190419	529.65	710.96	1.34	1.21	1.49	181.31	4.548	0.005082	529.65	317.04	-1.67	-1.28	-2.38	-212.61	-3.478	0.025787	581.79	477.11	509.04	550.68	774.63	755.18	678.22	635.81	158.38	416.6	375.47	317.72
201859_at	SRGN: serglycin	NM_002727	5552	g4506044	1021.4	1253.03	1.23	1.15	1.31	231.63	5.442	0.004836	1021.4	713.7	-1.43	-1.28	-1.61	-307.7	-5.458	0.00159	1124.82	947.33	1033.21	980.24	1223.4	1300.22	1228.92	1259.59	675.88	807.46	750.26	621.18
201861_s_at	LRRFIP1: leucine rich repeat (in FLII) interacting protein 1	BF965566	9208	Hs.326159.0	2622.06	2805.76	1.07	1	1.15	183.7	1.62	0.165163	2622.06	2453.51	-1.07	-1	-1.14	-168.55	-1.572	0.183986	2785.91	2782.57	2508.13	2411.63	2886.24	2834.92	2875.63	2626.27	2481.96	2562.98	2330.96	2438.12
201862_s_at	LRRFIP1: leucine rich repeat (in FLII) interacting protein 1	NM_004735	9208	g4758689	3761.45	3597.36	-1.05	-0.97	-1.13	-164.09	-0.956	0.378663	3761.45	3194.59	-1.18	-1.08	-1.29	-566.86	-3.193	0.021562	3866.42	3994.16	3645.67	3539.55	3426.51	3301.67	3820.02	3841.24	2929.49	3597.98	3062.54	3188.36
201863_at	FAM32A: family with sequence similarity 32, member A	NM_014077	26017	g7661695	1578.98	2025.82	1.28	1.13	1.44	446.84	3.044	0.05201	1578.98	1561.24	-1.01	-0.92	-1.13	-17.74	-0.179	0.86854	1564.56	1536.37	1567.85	1647.13	2298.77	2253.56	1770.74	1780.19	1311.43	1508.2	1730.52	1694.8
201864_at	GDI1: GDP dissociation inhibitor 1	NM_001493	2664	g4503970	1042.2	1586.96	1.52	1.31	1.74	544.75	4.202	0.019789	1042.2	1374.4	1.32	1.21	1.44	332.2	4.93	0.006037	1021.34	968.54	1107.91	1071.02	1843.7	1762.9	1380.83	1360.39	1375.07	1233.46	1527.5	1361.57
201865_x_at	NR3C1: nuclear receptor subfamily 3, group C, member 1 (glucocorticoid receptor)	AI432196	2908	Hs.75772.0	1051.36	1129.95	1.07	0.92	1.25	78.59	0.794	0.457962	1051.36	983.28	-1.07	-0.8	-1.55	-68.08	-0.357	0.740157	1192.52	1115.45	1005.17	892.3	1277.43	1234.05	1035.02	973.31	648.57	699.15	1270.69	1314.71
201866_s_at	NR3C1: nuclear receptor subfamily 3, group C, member 1 (glucocorticoid receptor)	NM_000176	2908	g4504132	174.3	232.81	1.34	1.18	1.5	58.51	3.834	0.011856	174.3	135.36	-1.29	-1.08	-1.56	-38.93	-2.479	0.05631	176.64	164.04	160.1	196.4	259.07	239.5	197.4	235.26	109.77	120.49	140.38	170.81
201867_s_at	TBL1X: transducin (beta)-like 1X-linked	AW968555	6907	Hs.76536.0	59.34	70.95	1.2	1.02	1.4	11.61	1.898	0.107862	59.34	78.84	1.33	1.08	1.61	19.5	2.184	0.088434	69.95	53.22	53.44	60.76	82.49	61.99	74.43	64.89	81.35	100.51	66.02	67.49
201868_s_at	TBL1X: transducin (beta)-like 1X-linked	AI082187	6907	Hs.76536.0	34.67	42.52	1.23	1.01	1.46	7.84	1.765	0.14305	34.67	35.05	1.01	0.85	1.19	0.37	0.103	0.921914	33.17	29.58	36.75	39.19	38.31	47.52	50.52	33.72	39.71	39.32	27.03	34.11
201869_s_at	TBL1X: transducin (beta)-like 1X-linked	BF593932	6907	Hs.76536.0	81.12	104.04	1.28	1.04	1.56	22.92	1.899	0.127241	81.12	88.41	1.09	0.9	1.3	7.28	0.77	0.476235	89.24	77.46	89.12	68.65	122.98	118.66	99.79	74.73	99.8	104.39	71.84	77.6
201870_at	TOMM34: translocase of outer mitochondrial membrane 34	NM_006809	10953	g5803204	757.78	950.16	1.25	1.05	1.46	192.39	2.092	0.11332	757.78	1034.22	1.36	1.02	1.71	276.45	1.767	0.170181	713.64	717.35	826.77	773.34	797.71	810.58	1157.4	1034.96	830.45	719.42	1222.52	1364.51
201871_s_at	LOC51035: SAPK substrate protein 1	NM_015853	51035	g7705653	1660.67	1697.93	1.02	0.95	1.1	37.26	0.487	0.644125	1660.67	1177.77	-1.41	-1.11	-1.92	-482.9	-2.476	0.079198	1775.95	1705.46	1549.89	1611.39	1636.37	1571.11	1829.1	1755.16	824.94	878.67	1508.11	1499.35
201872_s_at	ABCE1: ATP-binding cassette, sub-family E (OABP), member 1	AI002002	6059	Hs.12013.0	2603.07	2199.97	-1.18	-1.12	-1.25	-403.11	-5.317	0.002245	2603.07	2196.65	-1.19	-1.1	-1.29	-406.43	-3.692	0.01924	2623.95	2584.46	2712.26	2491.61	2354.85	2230.68	2078.07	2136.26	2050.75	2490.78	2149.84	2095.21
201873_s_at	ABCE1: ATP-binding cassette, sub-family E (OABP), member 1	NM_002940	6059	g4506558	3837.92	3291.86	-1.17	-1.14	-1.19	-546.06	-10.387	9.1e-05	3837.92	3834.91	-1	-0.94	-1.06	-3.02	-0.022	0.98379	3710.19	3874.45	3870.62	3896.44	3353.71	3260.74	3222.86	3330.13	4075.97	4010.25	3755.63	3497.78
201874_at	MPZL1: myelin protein zero-like 1	BF978611	9019	Hs.14891.0	534.82	426.25	-1.25	-0.99	-1.64	-108.58	-1.589	0.168412	534.82	653.92	1.22	1.09	1.4	119.09	2.893	0.052738	463.36	472.07	581.91	621.94	335.43	325.95	539.26	504.34	662.1	645.97	627.78	679.82
201875_s_at	MPZL1: myelin protein zero-like 1	NM_024569	9019	g13375739	531.79	399.62	-1.33	-1.12	-1.59	-132.17	-2.695	0.036938	531.79	739.19	1.39	1.14	1.68	207.4	2.689	0.046095	440.39	506.17	566.21	614.39	345.11	345.52	449.57	458.3	934.43	636.26	666.67	719.38
201877_s_at	PPP2R5C: protein phosphatase 2, regulatory subunit B', gamma isoform	NM_002719	5527	g4506022	1646.95	2040.73	1.24	1.05	1.44	393.78	2.036	0.12322	1646.95	1679.98	1.02	0.91	1.14	33.03	0.293	0.782655	1593.15	1613.11	1794.87	1586.67	2363.73	2360.96	1771.31	1666.91	1420.93	1624.64	1875.48	1798.85
201878_at	ARIH1: ariadne homolog, ubiquitin-conjugating enzyme E2 binding protein, 1 (Drosophila)	N25546	25820	Hs.181461.0	503.86	679.1	1.35	1.28	1.42	175.24	10.181	0.000105	503.86	552.04	1.1	0.95	1.24	48.17	1.087	0.343176	530.85	469.24	522.45	492.91	706.34	669.48	679.62	660.98	655.1	583.58	500.43	469.03
201879_at	ARIH1: ariadne homolog, ubiquitin-conjugating enzyme E2 binding protein, 1 (Drosophila)	AI694332	25820	Hs.181461.0	402.11	437.98	1.09	1	1.19	35.88	1.67	0.147099	402.11	391.28	-1.03	-0.89	-1.2	-10.83	-0.311	0.769441	398.94	364.49	443.93	401.08	441.98	463.98	447.73	398.25	301.68	408.09	413.27	442.05
201880_at	ARIH1: Ariadne homolog, ubiquitin-conjugating enzyme E2 binding protein, 1 (Drosophila)	AL040708	25820	Hs.181461.0	1169.27	1183.2	1.01	0.96	1.06	13.93	0.387	0.712312	1169.27	1205.43	1.03	0.98	1.08	36.16	1.078	0.324914	1212.82	1214.32	1142.7	1107.25	1201.27	1242.27	1132.48	1156.79	1194.99	1165.88	1262.76	1198.08
201881_s_at	ARIH1: ariadne homolog, ubiquitin-conjugating enzyme E2 binding protein, 1 (Drosophila)	NM_005744	25820	g9966762	482.8	664.65	1.38	1.22	1.57	181.84	4.602	0.005908	482.8	425.35	-1.14	-0.97	-1.33	-57.46	-1.321	0.236619	493.43	387.07	544.42	506.3	691.57	708.14	632.47	626.41	372.24	501.56	423.71	403.88
201883_s_at	B4GALT1: UDP-Gal:betaGlcNAc beta 1,4- galactosyltransferase, polypeptide 1	D29805	2683	g474986	512.69	794.09	1.55	0.88	2.68	281.4	1.303	0.249851	512.69	713.56	1.39	0.97	2.23	200.87	1.507	0.191098	472.66	214.26	724.67	639.17	1141.02	1084.12	454.5	496.74	569.32	617.69	796.64	870.6
201885_s_at	CYB5R3: cytochrome b5 reductase 3	NM_000398	1727	g6552326	4953.77	5268.35	1.06	1.01	1.12	314.58	1.838	0.119023	4953.77	5599.15	1.13	0.99	1.27	645.37	1.582	0.200698	4879.55	4719.02	5004.68	5211.84	5451.27	5506.96	5203.24	4911.94	4943.64	4892.75	6207.59	6352.6
201886_at	WDR23: WD repeat domain 23	NM_025230	80344	g13489107	399.11	575.59	1.44	1.31	1.58	176.48	5.517	0.008486	399.11	443.81	1.11	0.96	1.26	44.7	1.226	0.300554	410.76	375.94	404.27	405.45	529.28	515.88	638.9	618.3	420.84	357.71	472.66	524.02
201889_at	FAM3C: family with sequence similarity 3, member C	NM_014888	10447	g7661713	1525.93	1259.23	-1.21	-1.07	-1.38	-266.7	-2.453	0.051366	1525.93	1057.95	-1.44	-1.24	-1.69	-467.98	-4.041	0.006859	1593.21	1731.82	1418.3	1360.4	1129.62	1154.16	1360.42	1392.74	1162.59	1223.43	933.17	912.62
201890_at	RRM2: ribonucleotide reductase M2 polypeptide	BE966236	6241	Hs.75319.0	8588.43	4240.74	-2.03	-1.93	-2.12	-4347.69	-25.623	1e-06	8588.43	9785.55	1.14	1.1	1.18	1197.13	6.891	0.000554	8495.74	8492.47	8985.66	8379.84	4087.45	4055.9	4333.78	4485.82	9941.19	10005.4	9593.55	9602.05
201891_s_at	B2M: beta-2-microglobulin	NM_004048	567	g4757825	13096.1	14090.3	1.08	1.05	1.1	994.16	5.754	0.002367	13096.1	13169	1.01	0.98	1.04	72.96	0.304	0.776334	13344.8	12925	13043.8	13070.7	14314.7	14039.6	14316.1	13690.6	12617	13063	13321	13675.2
201892_s_at	IMPDH2: IMP (inosine monophosphate) dehydrogenase 2	NM_000884	3615	g4504688	6545.61	5006.15	-1.31	-1.15	-1.5	-1539.45	-3.771	0.024093	6545.61	7502.3	1.15	1.07	1.22	956.7	3.38	0.025177	6845.32	6635.41	6345.49	6356.21	4302.53	4359.6	5651.72	5710.77	7304.07	6868.58	7903.54	7933.03
201894_s_at	SSR1: signal sequence receptor, alpha (translocon-associated protein alpha)	NM_001920	6745	g4503270	2102.87	1857.66	-1.13	-1.02	-1.28	-245.21	-1.896	0.149866	2102.87	1582.04	-1.33	-1.08	-1.74	-520.83	-2.295	0.104049	2132.61	2070.78	2142.87	2065.23	2120.04	2031.98	1664.49	1614.12	1199.25	1183.58	2007.85	1937.48
201895_at	ARAF: v-raf murine sarcoma 3611 viral oncogene homolog	NM_001654	369	g4502192	211.56	290.01	1.37	0.97	2.27	78.45	1.476	0.220205	211.56	350.01	1.65	1.15	2.76	138.45	2.377	0.065402	131.64	117.28	295.01	302.32	309.74	326.46	269.28	254.57	432.96	295.85	335.24	335.99
201896_s_at	PSRC1: proline/serine-rich coiled-coil 1	BC001425	84722	g12655140	619.26	822.61	1.33	1.2	1.47	203.35	4.143	0.01717	619.26	752.91	1.22	1.13	1.31	133.65	4.207	0.009518	611.92	579.78	652.81	632.53	927.28	874.04	755.1	734.04	702.25	708.14	794.73	806.53
201897_s_at	CKS1B: CDC28 protein kinase regulatory subunit 1B	NM_001826	1163	g4502856	5145.72	5250.06	1.02	0.97	1.07	104.35	0.63	0.568329	5145.72	5074.57	-1.01	-0.93	-1.12	-71.14	-0.25	0.81772	5252.71	5166.28	5046.8	5117.08	5107.73	4939.04	5685.72	5267.76	5126.8	5844.74	4587	4739.75
201898_s_at	UBE2A: ubiquitin-conjugating enzyme E2A (RAD6 homolog)	AI126625	7319	Hs.80612.0	2182.83	2565.87	1.18	1.11	1.25	383.04	4.746	0.007347	2182.83	1858.25	-1.17	-1.01	-1.38	-324.58	-1.822	0.14	2015.09	2118.07	2343.17	2254.99	2552.73	2480.72	2578.59	2651.43	1380.96	2096.51	2025.33	1930.2
201899_s_at	UBE2A: ubiquitin-conjugating enzyme E2A (RAD6 homolog)	NM_003336	7319	g4507768	2727.53	3162.02	1.16	1.1	1.23	434.5	4.826	0.015189	2727.53	3308.46	1.21	1.12	1.31	580.94	4.041	0.007598	2596.76	2558.57	2924.29	2830.49	3179.62	3187.86	3126.28	3154.34	3245.5	3015.7	3494.98	3477.67
201900_s_at	AKR1A1: aldo-keto reductase family 1, member A1 (aldehyde reductase)	NM_006066	10327	g5174390	2693.18	2474.5	-1.09	-1.01	-1.17	-218.68	-1.864	0.118425	2693.18	2326.48	-1.16	-1.05	-1.28	-366.7	-2.424	0.052823	2802.86	2870.19	2429.37	2670.3	2579.32	2595.7	2346.36	2376.62	2622.3	2400.01	2147.34	2136.29
201901_s_at	YY1: YY1 transcription factor	Z14077	7528	Hs.97496.0	5416.82	5399.11	-1	-0.97	-1.04	-17.71	-0.161	0.877267	5416.82	5463.13	1.01	0.94	1.08	46.31	0.209	0.845016	5641.01	5373.74	5367.25	5285.28	5181.38	5398.72	5477.27	5539.06	5284.24	4960.85	5812.56	5794.86
201903_at	UQCRC1: ubiquinol-cytochrome c reductase core protein I	NM_003365	7384	g4507840	3445.72	3143.87	-1.1	-0.97	-1.26	-301.85	-1.197	0.292616	3445.72	4093.71	1.19	0.96	1.42	647.98	1.362	0.257619	3684.9	3201.41	3326.51	3570.09	3656.94	3393.5	2781.31	2743.75	5472.66	3493	3669.99	3739.18
201904_s_at	CTDSPL: CTD (carboxy-terminal domain, RNA polymerase II, polypeptide A) small phosphatase-like	BF031714	10217	Hs.147189.0	588.38	578.1	-1.02	-0.84	-1.28	-10.28	-0.14	0.897074	588.38	336.06	-1.75	-1.63	-1.89	-252.32	-15.401	7.7e-05	592.65	592.78	568.66	599.43	447.05	456.87	709.88	698.6	307.82	324.71	377.79	333.92
201905_s_at	CTDSPL: CTD (carboxy-terminal domain, RNA polymerase II, polypeptide A) small phosphatase-like	BF590317	10217	Hs.147189.0	218.51	231.33	1.06	0.84	1.28	12.82	0.439	0.688996	218.51	140.86	-1.55	-1.45	-1.66	-77.65	-11.427	2.9e-05	209.91	210.34	230.54	223.24	187.54	175.76	282.99	279.03	137.36	133.92	154.18	137.96
201906_s_at	CTDSPL: CTD (carboxy-terminal domain, RNA polymerase II, polypeptide A) small phosphatase-like	NM_005808	10217	g5031774	420.2	418.22	-1	-0.88	-1.17	-1.98	-0.055	0.959581	420.2	247.7	-1.7	-1.54	-1.88	-172.5	-10.513	0.000221	430	432.88	419.19	398.72	356.8	357.05	481.15	477.88	225.2	224.01	284.54	257.03
201908_at	DVL3: dishevelled, dsh homolog 3 (Drosophila)	NM_004423	1857	g6806886	514.97	625.34	1.21	1.15	1.28	110.37	5.436	0.004529	514.97	727.83	1.41	1.15	1.68	212.86	2.609	0.077907	540.96	508.62	506.54	503.78	636.3	581.99	669.01	614.07	664.4	528.03	873.21	845.69
201909_at	RPS4Y1: ribosomal protein S4, Y-linked 1	NM_001008	6192	g4506726	6671.78	6356.63	-1.05	-1.01	-1.1	-315.15	-1.908	0.11605	6671.78	6641.39	-1	-0.91	-1.12	-30.39	-0.073	0.945975	6884.32	6705.75	6614.62	6482.45	6208.14	6041.13	6668.35	6508.89	5447.27	7150.11	6800.02	7168.17
201912_s_at	GSPT1: G1 to S phase transition 1	NM_002094	2935	g4504166	2337.08	1432.79	-1.63	-1.51	-1.76	-904.29	-10.33	9e-05	2337.08	2168.22	-1.08	-0.98	-1.19	-168.86	-1.348	0.231905	2162.87	2371.41	2506.03	2308.01	1575.72	1428.77	1341.53	1385.16	2401.68	1950.45	2272.63	2048.11
201913_s_at	COASY: Coenzyme A synthase	NM_025233	80347	g13376837	1186.98	1074.92	-1.1	-0.98	-1.27	-112.06	-1.322	0.266229	1186.98	1010.46	-1.17	-0.99	-1.45	-176.53	-1.517	0.219796	1240.17	1208.57	1163.26	1135.94	967.84	903.76	1202.4	1225.68	802.86	824.79	1182.79	1231.4
201914_s_at	SEC63: SEC63 homolog (S. cerevisiae)	AK001465	11231	Hs.31575.0	2575.08	2359.63	-1.09	-1.01	-1.18	-215.45	-1.863	0.129963	2575.08	2360.58	-1.09	-0.95	-1.28	-214.5	-0.996	0.385443	2714.74	2559.97	2470.27	2555.34	2585.13	2471.23	2259.19	2122.96	1946.3	2056.63	2759.5	2679.89
201915_at	SEC63: SEC63 homolog (S. cerevisiae)	AI806665	11231	Hs.31575.0	263.68	231.01	-1.14	-1.02	-1.29	-32.68	-1.869	0.118654	263.68	228.83	-1.15	-0.95	-1.46	-34.85	-1.169	0.312546	277.68	257.75	280.11	239.2	251.08	261.02	208.18	203.75	154.48	216.09	279	265.75
201916_s_at	SEC63: SEC63 homolog (S. cerevisiae)	NM_007214	11231	g6005871	1548.07	1299.37	-1.19	-1.09	-1.31	-248.71	-3.175	0.020304	1548.07	1339.05	-1.16	-1.02	-1.33	-209.03	-1.866	0.129371	1497.4	1683.93	1553.35	1457.62	1404.52	1404.61	1186.72	1201.62	1111.94	1230.47	1535.03	1478.74
201917_s_at	SLC25A36: solute carrier family 25, member 36	AI694452	55186	Hs.42484.0	1835.09	2286.75	1.25	1.19	1.31	451.65	6.976	0.003485	1835.09	1888.6	1.03	0.84	1.21	53.5	0.26	0.811671	1800.53	1849.62	1880.55	1809.67	2306.58	2431.71	2279.15	2129.54	1370.19	1748.87	2201.49	2233.84
201918_at	SLC25A36: solute carrier family 25, member 36	AI927944	55186	Hs.42484.0	986.63	1114.57	1.13	1	1.27	127.94	1.687	0.145562	986.63	1054.86	1.07	0.91	1.24	68.23	0.698	0.518902	872.01	1040.44	1081.23	952.84	1161.76	1254.86	1062.24	979.4	821.2	1037.62	1214.17	1146.43
201919_at	SLC25A36: solute carrier family 25, member 36	AL049246	55186	Hs.42484.0	2330.11	2676.01	1.15	1.07	1.24	345.89	3.202	0.042217	2330.11	2497.79	1.07	0.96	1.2	167.67	1.017	0.349595	2582.51	2422.56	2175.05	2140.34	2625.08	2715.86	2639.83	2723.27	2313.38	2248.74	2757.65	2671.38
201920_at	SLC20A1: solute carrier family 20 (phosphate transporter), member 1	NM_005415	6574	g7382462	3528.19	2807.62	-1.26	-0.91	-2.04	-720.57	-1.097	0.350689	3528.19	4636.02	1.31	1.06	1.57	1107.83	2.039	0.130498	3556.92	3301.63	3625.44	3628.76	1667.94	1688.52	3944.11	3929.91	5747.44	5367.35	3688.54	3740.74
201921_at	GNG10 /// LOC552891: guanine nucleotide binding protein (G protein), gamma 10 /// hypothetical protein LOC552891	NM_004125	2790 /// 552891	g4758445	4337.21	4786.03	1.1	0.9	1.32	448.81	0.83	0.454318	4337.21	4631.98	1.07	0.98	1.17	294.77	1.239	0.267366	4716.12	4635.23	4029.88	3967.62	5728.03	5583.84	3973.48	3858.75	4316.13	4505.57	4884.49	4821.74
201922_at	TINP1: TGF beta-inducible nuclear protein 1	NM_014886	10412	g7662676	7648.88	6598.92	-1.16	-1	-1.38	-1049.96	-1.656	0.195793	7648.88	7628.87	-1	-0.95	-1.06	-20.01	-0.081	0.940294	7593.33	7729.61	7588.62	7683.95	5476.15	5531.3	7619.12	7769.12	6907.79	7897.1	7960.36	7750.21
201923_at	PRDX4: peroxiredoxin 4	NM_006406	10549	g5453548	3972.43	4295.93	1.08	0.97	1.2	323.5	1.15	0.314153	3972.43	3892.55	-1.02	-0.84	-1.29	-79.87	-0.162	0.880417	4020.08	4256.16	3830.78	3782.69	4668.43	4803.47	3740.18	3971.64	2848.59	3306.36	4685.27	4729.99
201924_at	AFF1: AF4/FMR2 family, member 1	NM_005935	4299	g5174572	2046.88	1761.77	-1.16	-0.91	-1.57	-285.11	-0.976	0.383688	2046.88	1726.42	-1.19	-1.07	-1.3	-320.46	-2.674	0.06194	2313.27	2160.21	1871.11	1842.93	2090.77	2346.4	1312.07	1297.84	1620.56	1779.7	1735.43	1769.98
201925_s_at	CD55: CD55 molecule, decay accelerating factor for complement (Cromer blood group)	NM_000574	1604	g10835142	267.78	381	1.42	1.33	1.52	113.22	9.386	9.4e-05	267.78	279.41	1.04	0.59	1.51	11.63	0.156	0.886013	282.35	253.87	284.66	250.24	357.95	390.51	391.91	383.62	134.92	169.53	425.99	387.2
201926_s_at	CD55: CD55 molecule, decay accelerating factor for complement (Cromer blood group)	BC001288	1604	g12654888	182.51	242.12	1.33	1.15	1.52	59.61	3.066	0.038491	182.51	186.52	1.02	0.64	1.41	4.01	0.094	0.930914	203.1	171.36	174.53	181.04	289.16	250.81	220.59	207.91	101.8	126.79	248.67	268.83
201927_s_at	PKP4: plakophilin 4	BG292559	8502	Hs.152151.0	511.08	640.47	1.25	1.13	1.4	129.39	3.42	0.01531	511.08	596.86	1.17	1.04	1.31	85.78	2.143	0.080249	480.77	461.35	555.56	546.65	564.57	626.76	668.29	702.27	525.32	567.41	674.82	619.9
201928_at	PKP4: plakophilin 4	AA194254	8502	Hs.152151.0	682.13	692.64	1.02	0.92	1.12	10.51	0.256	0.806624	682.13	790.71	1.16	1.01	1.32	108.59	1.763	0.142657	638.57	631.46	756.91	701.56	617.04	684.2	750.4	718.9	639.65	785.53	865.95	871.73
201929_s_at	PKP4: plakophilin 4	NM_003628	8502	g6806894	322.55	379.99	1.18	1.01	1.4	57.44	1.789	0.152999	322.55	371.6	1.15	0.86	1.5	49.06	0.827	0.446625	258.79	296.48	400.68	334.24	397.01	384.17	390.12	348.66	229.57	366.78	455.72	434.34
201930_at	MCM6: minichromosome maintenance complex component 6	NM_005915	4175	g7427518	6820.02	6294.51	-1.08	-1.01	-1.16	-525.51	-2.005	0.120673	6820.02	7604.94	1.12	1.08	1.15	784.92	6.538	0.000616	6780.63	6604.21	7015.58	6879.67	6863.65	6553.63	5894.32	5866.45	7624.06	7786.87	7383.24	7625.6
201931_at	ETFA: electron-transfer-flavoprotein, alpha polypeptide (glutaric aciduria II)	NM_000126	2108	g4503606	2655.63	2667.03	1	0.89	1.13	11.41	0.057	0.956321	2655.63	2357.64	-1.13	-0.9	-1.47	-297.99	-0.859	0.440554	2802.44	2296.74	2826.49	2696.84	2947.73	2922.71	2338.42	2459.26	1599.3	2041.34	2965.74	2824.15
201932_at	LRRC41: leucine rich repeat containing 41	NM_006369	10489	g5453747	267.42	251.18	-1.06	-0.89	-1.29	-16.24	-0.577	0.587318	267.42	328.4	1.23	1.06	1.42	60.98	2.333	0.060684	278.23	306.3	254.58	230.57	279.22	300.73	204.9	219.86	282.53	310.46	343.17	377.43
201933_at	CHMP1A: chromatin modifying protein 1A	NM_002768	5119	g4506138	659.7	804.94	1.22	1.15	1.3	145.24	5.723	0.003055	659.7	735.3	1.11	1.03	1.2	75.6	2.401	0.053205	622.51	623.71	677.94	714.64	780.05	834.75	811.92	793.04	765.32	669.61	750.72	755.54
201934_at	WDR82: WD repeat domain 82	N92524	80335	Hs.194110.0	5096.26	4643.37	-1.1	-0.95	-1.29	-452.89	-1.059	0.365764	5096.26	5225.32	1.03	0.98	1.07	129.06	0.907	0.42026	5065.39	5181.6	5153.27	4984.8	5388.92	5367.39	3836	3981.17	5059.03	4944.37	5527.68	5370.2
201935_s_at	EIF4G3: eukaryotic translation initiation factor 4 gamma, 3	AI768122	8672	Hs.25732.0	1368.81	1450.75	1.06	0.92	1.2	81.94	0.723	0.516295	1368.81	1155.45	-1.18	-1.13	-1.24	-213.36	-5.672	0.001321	1447.8	1339.26	1364.53	1323.66	1703.89	1564.09	1285.94	1249.06	1081.08	1166.23	1195.55	1178.95
201936_s_at	EIF4G3: eukaryotic translation initiation factor 4 gamma, 3	NM_003760	8672	g10092600	877.46	851.98	-1.03	-0.9	-1.19	-25.48	-0.354	0.738582	877.46	795.69	-1.1	-0.99	-1.23	-81.77	-1.492	0.188125	976.54	872.89	822.11	838.31	990.38	927.1	750.11	740.34	878.05	857.29	741.83	705.6
201937_s_at	DNPEP: aspartyl aminopeptidase	NM_012100	23549	g6912247	914.62	810.43	-1.13	-0.92	-1.44	-104.19	-0.949	0.403093	914.62	860.22	-1.06	-0.96	-1.18	-54.41	-1.002	0.358843	894.3	837.54	944.03	982.62	1028.9	952.41	625.04	635.38	914.77	735.35	860.24	930.5
201938_at	CDK2AP1: CDK2-associated protein 1	NM_004642	8099	g4758187	7834.05	9098.61	1.16	1.11	1.22	1264.56	5.22	0.003934	7834.05	7708.77	-1.02	-0.92	-1.14	-125.28	-0.248	0.815822	7417.88	7525.15	8210.44	8182.71	9340.55	9267.69	8913.83	8872.35	6801.03	7036.42	8436.93	8560.68
201940_at	CPD: carboxypeptidase D	AA897514	1362	Hs.5057.0	535.83	567.79	1.06	1	1.13	31.96	1.59	0.204481	535.83	489.91	-1.09	-1	-1.19	-45.92	-1.695	0.141217	568.89	492.83	569.97	511.63	562.71	569.84	561.47	577.12	515.45	526.36	469.18	448.63
201941_at	CPD: carboxypeptidase D	BE349147	1362	Hs.5057.0	574.08	596.28	1.04	0.91	1.17	22.19	0.488	0.652674	574.08	497.27	-1.15	-1.06	-1.26	-76.81	-2.9	0.031527	600.98	561.13	596.2	538.02	674.97	665.81	528.77	515.55	438.64	492.41	540.39	517.65
201942_s_at	CPD: carboxypeptidase D	D85390	1362	g3641620	37.74	61.63	1.63	1.26	2.04	23.9	2.87	0.053435	37.74	40.87	1.08	0.81	1.38	3.13	0.494	0.647814	40.13	32.06	42.56	36.19	42.32	61.97	81.49	60.74	34.28	58.51	34.12	36.57
201943_s_at	CPD: carboxypeptidase D	NM_001304	1362	g8051580	182.48	250.59	1.37	1.09	1.7	68.11	2.235	0.082964	182.48	159.82	-1.14	-0.95	-1.38	-22.66	-1.189	0.279479	175.93	154.22	219.52	180.25	214.56	193.46	300.9	293.42	141.31	199.3	152.53	146.14
201944_at	HEXB: hexosaminidase B (beta polypeptide)	NM_000521	3074	g13128866	2161.76	2286.55	1.06	0.95	1.17	124.8	0.865	0.438817	2161.76	1918.56	-1.13	-0.79	-1.97	-243.19	-0.485	0.660346	2306.66	2103.8	2119.46	2117.1	2062.96	2043.45	2562.35	2477.45	940.67	1177.88	2840.98	2714.72
201945_at	FURIN: furin (paired basic amino acid cleaving enzyme)	NM_002569	5045	g4505578	132.86	131.07	-1.01	-0.87	-1.18	-1.79	-0.144	0.890301	132.86	128.46	-1.03	-0.84	-1.29	-4.39	-0.263	0.801911	115.6	144.39	116.98	154.45	135.14	147.99	129.75	111.4	159.77	98.75	114.86	140.46
201946_s_at	CCT2: chaperonin containing TCP1, subunit 2 (beta)	AL545982	10576	Hs.6456.0	4889.22	4863.43	-1.01	-0.88	-1.18	-25.79	-0.059	0.956669	4889.22	4040.93	-1.21	-1.02	-1.48	-848.29	-1.898	0.150014	4802.97	4825.21	4842.17	5086.53	5965.12	5092.5	3968.45	4427.66	2737.45	4673.62	4478.19	4274.47
201947_s_at	CCT2: chaperonin containing TCP1, subunit 2 (beta)	NM_006431	10576	g5453602	11900.4	12188.1	1.02	0.95	1.1	287.73	0.558	0.612979	11900.4	12138	1.02	0.98	1.06	237.61	0.842	0.449102	12114.9	11721.5	11745.6	12019.5	13101	13014.7	11176.8	11459.9	12899.8	12078.3	11723.6	11850.2
201948_at	GNL2: guanine nucleotide binding protein-like 2 (nucleolar)	NM_013285	29889	g7019418	3065.86	3051.77	-1	-0.94	-1.07	-14.09	-0.121	0.90788	3065.86	3277.88	1.07	0.96	1.19	212.02	1.009	0.364159	2834.77	2980.91	3213.02	3234.74	3019.22	3188.26	2886.45	3113.17	3447.11	3709.33	3086.06	2869.02
201949_x_at	CAPZB: capping protein (actin filament) muscle Z-line, beta	AL572341	832	Hs.76368.0	3415.73	3090.9	-1.11	-1	-1.22	-324.83	-1.576	0.171675	3415.73	3470.23	1.02	0.92	1.13	54.49	0.25	0.811023	3752.6	2954.45	3536.77	3419.12	2998.77	2822.49	3379.22	3163.13	3766.34	3596.59	3126.78	3391.21
201950_x_at	CAPZB: capping protein (actin filament) muscle Z-line, beta	NM_004930	832	g4826658	1765.8	1486.54	-1.19	-1.1	-1.29	-279.25	-3.561	0.012205	1765.8	1659.7	-1.06	-0.99	-1.15	-106.1	-1.387	0.215076	1746.45	1902.85	1650.72	1763.16	1471.44	1326.11	1575	1573.62	1810.06	1672.94	1549.19	1606.61
201951_at	ALCAM: activated leukocyte cell adhesion molecule	BF242905	214	Hs.10247.0	930.68	648.39	-1.44	-1.2	-1.7	-282.3	-3.154	0.031833	930.68	769.49	-1.21	-1.03	-1.39	-161.2	-1.937	0.139796	1111.73	1022.57	812.99	775.45	562.2	610.38	697.02	723.95	731.11	782.12	814.01	750.69
201952_at	ALCAM: activated leukocyte cell adhesion molecule	AA156721	214	Hs.10247.0	1211.83	873.8	-1.39	-1.12	-1.67	-338.03	-2.387	0.087319	1211.83	1071.83	-1.13	-0.91	-1.37	-140	-0.956	0.395837	1463.99	1433.68	950.67	998.97	844.79	797.26	894.65	958.5	1047.87	957.81	1204.57	1077.06
201953_at	CIB1: calcium and integrin binding 1 (calmyrin)	NM_006384	10519	g9951921	2883.75	3466.35	1.2	0.98	1.54	582.6	1.446	0.219236	2883.75	3278	1.14	0.91	1.47	394.25	0.913	0.403244	2265.48	2229.64	3467.7	3572.18	3784.43	3712.97	3166.63	3201.37	2751.13	3055.71	3605.12	3700.05
201954_at	ARPC1B /// LOC653888: actin related protein 2/3 complex, subunit 1B, 41kDa /// similar to Actin-related protein 2/3 complex subunit 1B (ARP2/3 complex 41 kDa subunit) (p41-ARC)	NM_005720	10095 /// 653888	g5031600	3534.5	3239.43	-1.09	-0.98	-1.22	-295.08	-1.386	0.254365	3534.5	3203.15	-1.1	-0.93	-1.35	-331.35	-0.92	0.423888	3493.1	3452.65	3564.11	3628.16	2756.87	3053.87	3706.73	3440.24	2407.88	2828.15	3588.53	3988.05
201955_at	CCNC: cyclin C	AL137784	892	Hs.118442.0	4979.22	3149.38	-1.58	-1.34	-1.94	-1829.84	-5.207	0.013392	4979.22	4179.78	-1.19	-1.14	-1.25	-799.44	-7.071	0.00406	4919.41	4985.55	5045.52	4966.4	2488.5	2608.03	3647.74	3853.25	4354.04	4094.71	4362.81	3907.58
201956_s_at	GNPAT: glyceronephosphate O-acyltransferase	NM_014236	8443	g7657133	3960.58	4374.76	1.1	1.06	1.15	414.18	3.891	0.025848	3960.58	4193.65	1.06	1.01	1.1	233.06	2.186	0.109524	3926.96	3978.31	4014.03	3923.02	4085.91	4525.21	4358.49	4529.42	3917.62	4279.45	4409.39	4168.12
201957_at	PPP1R12B: protein phosphatase 1, regulatory (inhibitor) subunit 12B	AF324888	4660	g12642661	107.48	140.98	1.31	1.17	1.46	33.5	3.689	0.028402	107.48	164.95	1.53	1.35	1.72	57.47	4.837	0.014405	113.54	107.67	103.79	104.92	115.6	143.41	149.4	155.52	183.95	184.23	136.54	155.1
201959_s_at	MYCBP2: MYC binding protein 2	AA488899	23077	Hs.151411.0	933.44	1142.39	1.22	1.1	1.35	208.95	3.181	0.023927	933.44	976.84	1.05	0.98	1.12	43.4	1.126	0.321453	986.19	830.59	971	945.98	1059.2	1035.25	1250.62	1224.49	955.39	985.64	949.37	1016.94
201960_s_at	MYCBP2: MYC binding protein 2	NM_015057	23077	g7662379	2519.14	2571.69	1.02	0.94	1.11	52.55	0.402	0.713742	2519.14	2332.36	-1.08	-0.99	-1.19	-186.78	-1.462	0.237514	2483.73	2555.09	2525.14	2512.58	2295.9	2405.96	2769.02	2815.88	1975.55	2575.76	2398.09	2380.03
201961_s_at	RNF41: ring finger protein 41	AL583171	10193	Hs.153639.0	229.09	232.9	1.02	0.94	1.1	3.81	0.348	0.740016	229.09	217.13	-1.06	-0.92	-1.23	-11.96	-0.619	0.567802	220.78	210.63	244.11	240.86	238.53	210.88	238.2	244	258.01	228.91	174.83	206.76
201962_s_at	RNF41: ring finger protein 41	NM_005785	10193	g5032070	428.42	566.13	1.32	1	1.66	137.71	1.66	0.181354	428.42	510.97	1.19	1.06	1.35	82.55	2.406	0.052892	486.69	448.81	394.52	383.67	455.7	412.55	748.28	648	576.93	466.5	517.65	482.8
201963_at	ACSL1: acyl-CoA synthetase long-chain family member 1	NM_021122	2180	g12669906	610.77	900.4	1.47	1.3	1.68	289.63	4.854	0.003721	610.77	867.53	1.42	1.28	1.59	256.76	5.62	0.001469	573.65	534.36	687.73	647.33	960.47	997.89	784.73	858.51	849.6	807.72	949.12	863.69
201964_at	SETX: senataxin	N64643	23064	Hs.154919.0	551.93	682.21	1.24	1.1	1.38	130.28	2.864	0.041367	551.93	694.09	1.26	1.12	1.4	142.15	3.238	0.027059	521.59	513.64	590.83	581.67	731.06	764.86	649.47	583.46	596.96	683.12	709.76	786.5
201965_s_at	SETX: senataxin	NM_015046	23064	g7662211	543.57	691.1	1.27	1.17	1.38	147.54	4.7	0.003787	543.57	641.56	1.18	1.09	1.28	97.99	3.548	0.012104	583.84	490.74	556.48	543.21	623.5	695.09	705.08	740.73	583.2	665.25	657.09	660.69
201966_at	NDUFS2: NADH dehydrogenase (ubiquinone) Fe-S protein 2, 49kDa (NADH-coenzyme Q reductase)	NM_004550	4720	g4758785	1636.09	1836.89	1.12	1.07	1.18	200.8	3.823	0.010411	1636.09	1777.64	1.09	0.92	1.26	141.55	0.832	0.46311	1716.99	1651.11	1584.18	1592.1	1818.63	1948.43	1742.38	1838.11	1434.47	1547.93	2092.92	2035.23
201967_at	RBM6: RNA binding motif protein 6	NM_005777	10180	g5032032	751.27	818.88	1.09	0.93	1.26	67.61	0.919	0.406946	751.27	838.73	1.12	1.04	1.2	87.46	2.543	0.06227	727.56	673.28	809.48	794.77	885.75	973.52	715.94	700.31	862.86	861.94	818.84	811.28
201968_s_at	PGM1: phosphoglucomutase 1	NM_002633	5236	g4505764	2163.66	2268.23	1.05	0.95	1.16	104.57	0.789	0.479601	2163.66	2500.04	1.16	1.01	1.32	336.38	1.751	0.13132	2435.35	2318.83	1994.66	1905.79	2271.77	2373.98	2192.03	2235.13	2389.36	2142.39	2728.18	2740.23
201969_at	NASP: nuclear autoantigenic sperm protein (histone-binding)	AW003362	4678	Hs.243886.0	955.66	704.41	-1.36	-0.97	-1.82	-251.25	-1.527	0.194253	955.66	1440.48	1.51	1.17	2.05	484.82	2.759	0.038255	1220.82	1198.22	705.43	698.18	828.15	837.58	556.84	595.08	1362.55	1202.73	1600.65	1596.01
201970_s_at	NASP: nuclear autoantigenic sperm protein (histone-binding)	NM_002482	4678	g4505332	4988.02	5504.99	1.1	1.01	1.2	516.97	1.887	0.129891	4988.02	4828.09	-1.03	-0.97	-1.1	-159.93	-0.914	0.397098	5284.75	4988.11	4749.41	4929.81	5991	5877.92	5141.15	5009.9	4496.41	5157.93	4835.17	4822.84
201971_s_at	ATP6V1A: ATPase, H+ transporting, lysosomal 70kDa, V1 subunit A	NM_001690	523	g4502304	209.2	213.69	1.02	0.85	1.21	4.49	0.2	0.849162	209.2	242.01	1.16	0.67	1.67	32.82	0.52	0.636807	181.98	204.8	237.85	212.17	256.12	235.09	190.18	173.37	92.46	188.14	354.42	333.04
201972_at	ATP6V1A: ATPase, H+ transporting, lysosomal 70kDa, V1 subunit A	AF113129	523	g6523820	1963.38	1712.61	-1.15	-1.01	-1.29	-250.77	-1.841	0.12251	1963.38	2428.71	1.24	1	1.49	465.34	1.677	0.166049	2143.25	1647.73	2112.19	1950.34	1858.34	1826.09	1565.03	1600.96	2030.66	1952.48	2894.91	2836.81
201973_s_at	C7orf28A: chromosome 7 open reading frame 28A	AL550875	51622	Hs.289112.0	6326.82	6841.47	1.08	0.95	1.22	514.65	1.034	0.359902	6326.82	6987.86	1.1	1.04	1.18	661.04	2.611	0.040436	6472.8	5778.71	6426.83	6628.94	6011.99	6076.47	7685.11	7592.32	6958.72	7477.12	6751.46	6764.16
201974_s_at	C7orf28A /// C7orf28B /// LOC652200: chromosome 7 open reading frame 28A /// chromosome 7 open reading frame 28B /// similar to CG14980-PB	NM_015622	221960 /// 51622 /// 652200	g11056021	37.33	37.93	1.02	0.8	1.28	0.61	0.113	0.914116	37.33	42.34	1.13	0.89	1.43	5.01	0.877	0.417387	44.83	40.87	30.39	33.22	33.86	39	29.66	49.21	53.64	31.2	44.05	40.49
201975_at	CLIP1: CAP-GLY domain containing linker protein 1	NM_002956	6249	g4506750	532.74	764.23	1.43	1.24	1.63	231.49	3.735	0.032039	532.74	808.19	1.52	1.32	1.71	275.46	4.396	0.020717	514.13	536.28	547.71	532.83	887.95	850.17	679.87	638.92	991.82	747.2	774.89	718.86
201977_s_at	KIAA0141: KIAA0141	AI539425	9812	Hs.63510.0	137.49	152.65	1.11	0.97	1.26	15.16	1.274	0.266103	137.49	107.66	-1.28	-1.02	-1.7	-29.83	-1.773	0.157886	130.13	132.22	134.62	153	121.7	170.74	159.34	158.83	74.74	99.59	104.96	151.35
201979_s_at	PPP5C: protein phosphatase 5, catalytic subunit	NM_006247	5536	g5453957	192.83	153.96	-1.25	-1.08	-1.48	-38.87	-2.613	0.057777	192.83	153.14	-1.26	-0.99	-1.73	-39.69	-1.545	0.210882	180.66	190.82	190.67	209.19	172.82	168.68	160.58	113.76	139.79	88.06	193.43	191.3
201980_s_at	RSU1: Ras suppressor protein 1	NM_012425	6251	g10800408	1775.17	1851.41	1.04	0.95	1.13	76.24	0.791	0.469497	1775.17	1734.61	-1.02	-0.96	-1.1	-40.56	-0.569	0.591367	1693.56	1891.43	1786.6	1729.11	1667.85	1742.46	1977.31	2018.04	1755.7	1885.45	1665.48	1631.81
201981_at	PAPPA: pregnancy-associated plasma protein A, pappalysin 1	AA148534	5069	Hs.75874.0	70.85	89.06	1.26	1.05	1.48	18.22	2.083	0.097831	70.85	60.12	-1.18	-0.9	-1.67	-10.72	-0.956	0.394953	82.69	64.63	68.09	67.97	74.66	77.23	98.23	106.13	39.83	45.26	72.09	83.33
201985_at	KIAA0196: KIAA0196	NM_014846	9897	g7661987	1018.98	1351.11	1.33	1.17	1.52	332.13	4.101	0.023243	1018.98	1036.41	1.02	0.89	1.17	17.43	0.208	0.846187	1143.34	795.47	1122.83	1014.27	1325.83	1326.83	1377.48	1374.29	1079.22	1078.34	1011.08	977
201986_at	MED13: mediator complex subunit 13	AB011165	9969	Hs.11861.0	790.04	999.65	1.27	1.18	1.36	209.6	5.696	0.001271	790.04	800.09	1.01	0.75	1.28	10.05	0.079	0.941711	865.47	758.14	759.01	777.56	1015.67	1051.6	1005.4	925.91	554.06	618.67	981.73	1045.91
201987_at	MED13: mediator complex subunit 13	AI984051	9969	Hs.11861.0	1928.01	2160.83	1.12	1.06	1.19	232.82	3.055	0.038753	1928.01	1879.39	-1.03	-0.83	-1.34	-48.63	-0.181	0.867379	1963.88	1877.15	1988.27	1882.76	2240.28	2307.86	1990.23	2104.97	1342.48	1499.58	2336.02	2339.47
201988_s_at	CREBL2: cAMP responsive element binding protein-like 2	BF438056	1389	Hs.13313.0	133.18	174.69	1.31	0.54	2.17	41.5	0.65	0.557635	133.18	100.11	-1.33	-0.98	-1.86	-33.07	-1.548	0.172862	162.46	153.03	116.16	101.08	66.15	68.08	286.34	278.17	120.44	132.65	78.1	69.25
201989_s_at	CREBL2: cAMP responsive element binding protein-like 2	AL529409	1389	Hs.13313.0	476.32	662	1.39	0.56	2.31	185.68	0.757	0.499749	476.32	424.29	-1.12	-0.85	-1.52	-52.03	-0.672	0.526874	547.94	580.37	392.63	384.34	235.82	257.56	1077.93	1076.69	468.96	566.01	353.71	308.5
201990_s_at	CREBL2: cAMP responsive element binding protein-like 2	NM_001310	1389	g4503034	312.68	336.46	1.08	0.5	1.67	23.78	0.215	0.842833	312.68	220.65	-1.42	-1.25	-1.6	-92.03	-4.382	0.009538	351.29	338.42	282.98	278.02	152.3	143.68	509.03	540.84	205.81	228.03	243.76	204.98
201991_s_at	KIF5B: kinesin family member 5B	BF223224	3799	Hs.149436.0	3769.16	4698.51	1.25	1.06	1.48	929.36	2.264	0.064436	3769.16	3634.08	-1.04	-0.89	-1.19	-135.08	-0.419	0.697518	3214.07	3286.59	4345.68	4230.29	5177.05	5179.39	4307.07	4130.54	3679.35	3944.55	3472.94	3439.48
201992_s_at	KIF5B: kinesin family member 5B	NM_004521	3799	g4758647	395.31	489.49	1.24	1.01	1.55	94.18	1.739	0.135765	395.31	288.71	-1.37	-1.06	-1.76	-106.6	-2.029	0.093842	324.63	328.39	503.08	425.14	503.38	565.37	484.91	404.32	311.1	362.71	256.71	224.33
201993_x_at	HNRPDL: heterogeneous nuclear ribonucleoprotein D-like	NM_005463	9987	g4885422	7740.01	7316.19	-1.06	-1.02	-1.1	-423.82	-2.591	0.057214	7740.01	7956.59	1.03	1	1.05	216.58	1.923	0.105875	7869.9	7848.9	7620.96	7620.28	7544.2	7597.54	7022.4	7100.64	7711.06	8002.32	7976.79	8136.19
201994_at	MORF4L2: mortality factor 4 like 2	NM_012286	9643	g6912447	7821.36	8036.21	1.03	0.98	1.08	214.84	0.963	0.373269	7821.36	6318.62	-1.24	-0.91	-1.95	-1502.75	-1.07	0.360966	8116.21	8084.05	7655.92	7429.29	8419.78	8109.92	7769.13	7845.99	3624.06	4203.29	8627.77	8819.34
201995_at	EXT1: exostoses (multiple) 1	NM_000127	2131	g4557570	282.05	342.08	1.21	0.89	1.55	60.04	1.064	0.360166	282.05	257.59	-1.09	-0.94	-1.3	-24.45	-0.951	0.392444	310.67	258.17	278.12	281.22	422.14	452.39	252.89	240.9	297.57	298.33	215.89	218.58
201996_s_at	SPEN: spen homolog, transcriptional regulator (Drosophila)	AL524033	23013	Hs.184245.0	823.78	940.21	1.14	0.96	1.33	116.44	1.267	0.285576	823.78	853.03	1.04	0.94	1.14	29.26	0.599	0.578302	885.04	779.27	807.59	823.2	1135.2	1047.2	801.97	776.48	809.34	981.21	791.4	830.19
201997_s_at	SPEN: spen homolog, transcriptional regulator (Drosophila)	NM_015001	23013	g7657266	1575.85	1590.79	1.01	0.93	1.09	14.94	0.205	0.84831	1575.85	1815.71	1.15	1.07	1.24	239.85	3.006	0.045478	1638.29	1588.75	1531.05	1545.31	1623.42	1767.95	1519.58	1452.2	1816.86	2000.01	1627.45	1818.51
201998_at	ST6GAL1: ST6 beta-galactosamide alpha-2,6-sialyltranferase 1	AI743792	6480	Hs.2554.0	630.99	452.21	-1.4	-1.13	-1.8	-178.77	-2.78	0.055548	630.99	366.47	-1.72	-1.62	-1.83	-264.52	-12.392	0.0003	684.58	634.44	613.86	591.07	547.78	567.78	352.53	340.76	344.37	373.58	369.18	378.74
201999_s_at	DYNLT1: dynein, light chain, Tctex-type 1	NM_006519	6993	g5730084	2108.65	2462.66	1.17	0.63	1.71	354.01	0.512	0.643108	2108.65	2782.45	1.32	1.05	1.6	673.8	1.962	0.137388	2218.29	2233.9	2028.27	1954.13	1313.05	1231.78	3683.47	3622.34	2050.82	2370.99	3359.77	3348.2
202000_at	NDUFA6: NADH dehydrogenase (ubiquinone) 1 alpha subcomplex, 6, 14kDa	BC002772	4700	g12803858	677.42	645.94	-1.05	-1	-1.1	-31.48	-1.621	0.162746	677.42	713.19	1.05	0.75	1.36	35.77	0.288	0.791874	648.25	698.93	651.66	710.86	654.4	613.33	657.24	658.8	826.22	1007.55	497.83	521.17
[truncated: 29,595 more rows]

## Sheet: Regulated by TYK2 KD (786)
Supplementary Table 5: Gene expression profile after TYK2 and STAT1 knockdown in JURKAT cells (Regulated by TYK2 KD)
[truncated: 789 more rows]

## Sheet: Regulated by STAT1 KD (566)
Supplementary Table 5: Gene expression profile after TYK2 and STAT1 knockdown in JURKAT cells (Regulated by STAT1 KD)
[truncated: 569 more rows]
