# Supplementary material for: TYK2–STAT1–BCL2 Pathway Dependence in T-cell Acute Lymphoblastic Leukemia
Source: Oxford University Press journal article supplement (doi:10.1158/2159-8290.cd-12-0504), 2013-03-07
Supplement: 21598290cd120504-sup-tab6.xls [file 21598290cd120504-sup-tab6.xls]

## Sheet: Table S5
Supplementary Table 6. TYK2 genotype in 17 T-ALL cell lines.
Cell Line	TYK2 Genotype
CCRF-CEM	R1027H
DND-41	wild-type
DU.528	wild-type
HPB-ALL	wild-type
JURKAT	wild-type
KOPT-K1	wild-type
LOUCY	wild-type
MOLT-16	G36D, S47N, R425H, R1027H
MOLT-4	E957D
PEER	wild-type
PF-382	wild-type
RPMI-8402	V731I
SKW-3/KE-37	wild-type
SUP-T11	wild-type
SUP-T13	wild-type
TALL-1	wild-type
ALL-SIL	wild-type
