# Supplementary material for: TYK2–STAT1–BCL2 Pathway Dependence in T-cell Acute Lymphoblastic Leukemia
Source: Oxford University Press journal article supplement (doi:10.1158/2159-8290.cd-12-0504), 2013-03-07
Supplement: 21598290cd120504-sup-tab8.xls [file 21598290cd120504-sup-tab8.xls]

## Sheet: Table S8
Supplementary Table 8. PCR Primer sequences
Gene	Forward	Reverse
STAT1	TGGCGAGAACCTAAGTTTCAGT	CCCAAAGGGCAAAAAGAACT
IL10RA	GCCTCAGTTTCCTCATCTGC	AGCTTTGTGTTCAAGGCACA
IL10RB	TGCTACACAGAGCACGGACT	GGAGCACCAGCAGCATATAA
IL10	AGCTGTGGCCAGCTTGTTAT	CTCCCAAAGTGCTGGGATTA
IFNAR1	TTGTATTCAGGCTGGGAACC	TTTCTTGGGCATTAGGGATG
IFNAR2	TGGAATGCAGTGGCTATTCA	AATCCCAGCTACTGGGGAAG
IL6ST	GCTGCTTGGGTTCTCCATAG	TTTAGCGGTTGGGGAAAATA
IL11RA	GGAGCCCATTTCTGTGAGAC	CGTTCCTTGAGCAGAACTCC
IL12RB1	ACAAAGGCGAGAGGACTGAG	TGTCTCCATCCTCCAAGGAC
IL12RB2	ACCTCTGCACTCACTGTCCA	TAGCCACTAGCCATGTGTGG
IL27RA	TGCAGCATGGACTGAGTTCT	GTTCCAGCTCATAGGCAAGG
BCL2	AACAGAGGGAGGGTTCCTGT	TTTTCCTCCCACCAGGTATG
GAPDH	CTCCTCTGACTTCAACAGCGACAC	TGCTGTAGCCAAATTCGTTGTCAT
